# Supplementary material for: A highly efficient BF3·Et2O-catalysed intramolecular [3+2] cycloaddition for the synthesis of 3,4-dihydrobenzopyrano[3,4-c]pyrazoles
Source: Royal Society of Chemistry journal article supplement (doi:10.1039/c2ra22025c), 2012-12-06
Supplement: c2ra22025c.pdf [file c2ra22025c.pdf]

**A highly efficient  $\text{BF}_3 \cdot \text{Et}_2\text{O}$ -catalysed intramolecular [3+2]  
cycloaddition for the synthesis of  
3,4-dihydrobenzopyrano[3,4-*c*]pyrazoles**

**Wei-Liang Wang, Yu-Lan Feng, Wen-Qiang Gao, Xiaoyan Luo and Wei-Ping Deng**

Shanghai Key Laboratory of New Drug Design & School of Pharmacy, East China University of  
Science and Technology, 130 Meilong Road, Shanghai 200237, China.

*E-mail: weiping\_deng@ecust.edu.cn*

## **Contents**

|                                                                   |    |
|-------------------------------------------------------------------|----|
| 1. General information.....                                       | S2 |
| 2. General procedure for the synthesis of compound <b>7</b> ..... | S2 |
| 3. Analytic data of <b>6</b> , <b>7</b> and <b>13</b> .....       | S4 |

## 1. General information

Flash chromatography was performed with freshly distilled solvents.  $^1\text{H}$  NMR (400 MHz) and  $^{13}\text{C}$  NMR (100 MHz) spectra were recorded using  $\text{CDCl}_3$  as solvent. Chemical shifts ( $\delta$ ) are reported in ppm, using TMS as an internal standard. Data are presented as follows: chemical shift (ppm), multiplicity (s = singlet, d = doublet, t = triplet, q = quartet, m = multiplet). Solvents were purified using the following method. THF was dried over sodium for 4 h and distilled under  $\text{N}_2$  atmosphere.  $\text{CH}_2\text{Cl}_2$  was dried over  $\text{CaH}_2$  for 4 h and distilled under  $\text{N}_2$  atmosphere. Other solvents and materials were used as received. All the reactions were carried out under  $\text{N}_2$ .

## 2. General procedure for the synthesis of compound 7

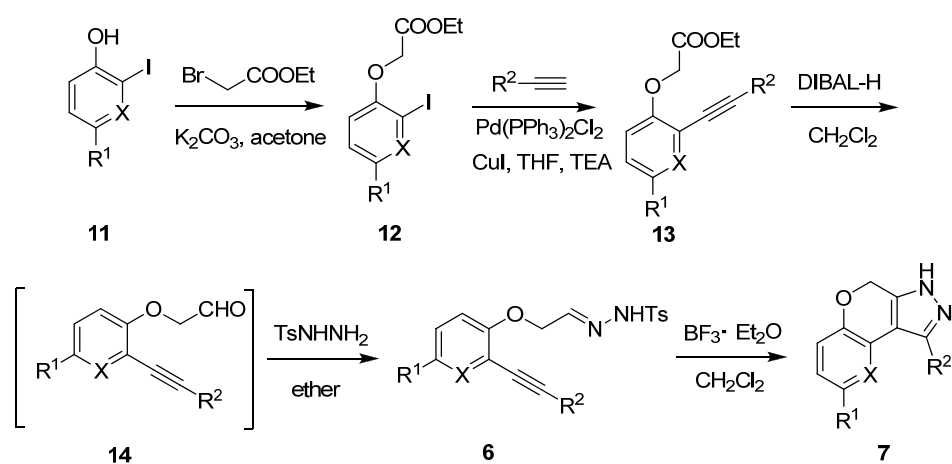

X = N, CH;  $\text{R}^1$  = H,  $\text{CH}_3$ , Br, *t*-Bu;  $\text{R}^2$  = Ph, *p*- $\text{MeC}_6\text{H}_4$ , *p*- $\text{MeOC}_6\text{H}_4$ , *n*-Bu, 2-thiophene, Cyclopropyl

In a 250 mL of three necked flask was added **11** (20.0 mmol),  $\text{K}_2\text{CO}_3$  (40.0 mmol), acetone (100 mL) and ethyl 2-bromoacetate (30.0 mmol). After refluxing overnight, cooled to r.t., solid was filtrated. The filtrate is concentrated in vacuum affording **12**, which was used in next step without further purification.

In a 250 mL of oven dried three necked flask was added **12** (10.0 mmol),  $\text{Pd}(\text{PPh}_3)_2\text{Cl}_2$  (0.2 mmol),  $\text{CuI}$  (0.4 mmol) under  $\text{N}_2$ , then THF (30 mL) and  $\text{Et}_3\text{N}$  (30 mL) was added successively. The reaction mixture was heated to 45 °C, and then terminal alkyne (20.0 mmol) was added dropwise. After the addition, the resulting solution was stirred for additional 3 h, then cooled down to r.t., filtrated, the filtrate was concentrated in vacuum and purified by silica gel column chromatography, affording pure compound **13**.

Compound **13** (9.0 mmol) was dissolved in  $\text{CH}_2\text{Cl}_2$  (30 mL) under  $\text{N}_2$ , then cooled to -78 °C, and DIBAL-H (1M in hexane, 9 mL) was added dropwise. After the addition, the solution was stirred at -78 °C for additional 2 h. After the completion of reaction, methanol (9 mL) was added and

stirred for additional 5 min, then poured into ice-water, acidified with diluted HCl to pH 5-6, extracted with CH<sub>2</sub>Cl<sub>2</sub> for 3 times. The organic layers were combined and washed with brine, dried over Na<sub>2</sub>SO<sub>4</sub>, concentrated in vacuum to give **14**, which was used in next step without further purification.

Compound **14** (4.0 mmol) was dissolved in ether (15 mL), 2 drops diluted HCl was added, and the mixture was then cooled in ice-water. After addition of TsNHNH<sub>2</sub> (4.0 mmol) in portions within 5 min, white solid formed, which was then filtrated and washed with cooled ether, dried in vacuum affording compound **6**.

Compound **6** (1.0 mmol) was dissolved in CH<sub>2</sub>Cl<sub>2</sub> (10 mL), cooled with ice-water. A solution of BF<sub>3</sub>·Et<sub>2</sub>O (48% in ether, 0.1 mL, 0.3 mmol) in CH<sub>2</sub>Cl<sub>2</sub> (2 mL) was then added in dropwise. After the addition, the resulting solution was stirred at 0 °C for 3 h. The reaction was then quenched with saturated NaHCO<sub>3</sub> (5 mL), and extracted with CH<sub>2</sub>Cl<sub>2</sub> for 3 times, washed with brine, dried over Na<sub>2</sub>SO<sub>4</sub>, concentrated in vacuum. The residue was purified by silica gel column chromatography to give pure tricyclic fused-pyrazole **7**.

### 3. Analytic data of 6, 7 and 13

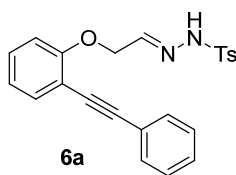

#### **(E)-4-Methyl-N'-(2-(2-(phenylethynyl)phenoxy)ethylidene)benzenesulfonohydrazide (6a)**

White solid (91%); m.p. = 105-106 °C; <sup>1</sup>H NMR (400 MHz, DMSO-d<sub>6</sub>) δ 11.49 (br s, 1H), 7.71 (d, *J* = 7.6 Hz, 2H), 7.50-7.36 (m, 9H), 7.27-7.23 (m, 1H), 7.00-6.96 (m, 2H), 4.72 (d, *J* = 4.0 Hz, 2H), 2.36 (s, 3H); <sup>13</sup>C NMR (100 MHz, DMSO-d<sub>6</sub>) δ 158.2, 145.5, 143.4, 136.0, 133.1, 131.2, 130.1, 129.6, 128.7, 128.6, 127.1, 122.6, 121.1, 112.9, 111.8, 93.2, 85.8, 67.3, 21.0; IR (film): 3198, 1442, 1367, 1344, 1307, 1224, 1014, 918, 753, 687, 577 cm<sup>-1</sup>; HRMS-ESI (*m/z*) calcd. for C<sub>23</sub>H<sub>20</sub>N<sub>2</sub>O<sub>3</sub>SNa [M+Na]<sup>+</sup> 427.1092, found: 427.1095.

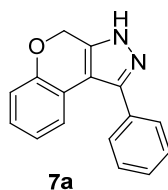

#### **1-Phenyl-3,4-dihydrochromeno[3,4-c]pyrazole (7a)**

White solid (86%); m.p. = 170-172 °C; <sup>1</sup>H NMR (400 MHz, CDCl<sub>3</sub>) δ 7.65-7.63 (m, 2H), 7.54-7.52 (m, 3H), 7.34 (d, *J* = 7.6 Hz, 1H), 7.12-7.08 (m, 1H), 7.01-6.99 (m, 1H), 6.85 (t, *J* = 7.4 Hz, 1H), 4.85 (s, 2H); <sup>13</sup>C NMR (100 MHz, CDCl<sub>3</sub>) δ 152.5, 146.4, 138.9, 130.1, 129.4, 129.2, 128.6, 127.6, 122.9, 122.0, 119.7, 117.5, 109.5, 63.9; IR (film): 3147, 3070, 2920, 1434, 1207, 1133, 1097, 1030, 750, 700, 559 cm<sup>-1</sup>; HRMS-EI (*m/z*) calcd. for C<sub>16</sub>H<sub>12</sub>N<sub>2</sub>O [M]<sup>+</sup> 248.0950, found: 248.0952.

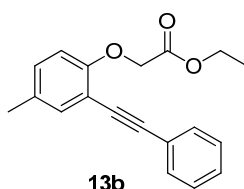

#### **Ethyl 2-(4-methyl-2-(phenylethynyl)phenoxy)acetate (13b).**

Yellow oil (86%); <sup>1</sup>H NMR (400 MHz, CDCl<sub>3</sub>) δ 7.57-7.54 (m, 2H), 7.35-7.30 (m, 4H), 7.07-7.04

(m, 1H), 6.74 (d,  $J = 8.0$  Hz, 1H), 4.70 (s, 2H), 4.25 (q,  $J = 7.2$  Hz, 2H), 2.28 (s, 3H), 1.28 (t,  $J = 7.2$  Hz, 3H);  $^{13}\text{C}$  NMR (100 MHz,  $\text{CDCl}_3$ )  $\delta$  168.9, 156.5, 134.0, 131.7, 131.3, 130.2, 128.3, 128.2, 123.6, 113.5, 113.4, 93.7, 85.6, 66.8, 61.3, 20.4, 14.2; IR (film): 2981, 2925, 2212, 1759, 1501, 1442, 1297, 1197, 1114, 1071, 805, 758, 692  $\text{cm}^{-1}$ ; HRMS-EI ( $m/z$ ) calcd. for  $\text{C}_{19}\text{H}_{18}\text{O}_3$   $[\text{M}]^+$  294.1256, found: 294.1257.

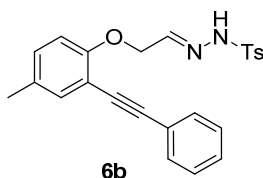

**4-Methyl-N'-(2-(4-methyl-2-(phenylethynyl)phenoxy)ethylidene)benzenesulfonohydrazide (6b)**

White solid (67%); m.p. = 112-114 °C;  $^1\text{H}$  NMR (400 MHz,  $\text{DMSO-d}_6$ )  $\delta$  11.47 (br s, 1H), 7.71 (d,  $J = 8.4$  Hz, 2H), 7.51-7.49 (m, 2H), 7.44-7.42 (m, 4H), 7.37 (d,  $J = 8.0$  Hz, 2H), 7.28 (d,  $J = 1.6$  Hz, 1H), 7.02 (dd,  $J = 8.8, 1.6$  Hz, 1H), 6.84 (d,  $J = 8.4$  Hz, 1H), 4.67 (d,  $J = 4.8$  Hz, 2H), 2.37 (s, 3H), 2.23 (s, 3H);  $^{13}\text{C}$  NMR (100 MHz,  $\text{DMSO-d}_6$ )  $\delta$  156.6, 146.1, 143.9, 136.6, 133.8, 131.7, 131.1, 130.5, 130.2, 129.2, 129.1, 127.6, 123.2, 113.5, 112.1, 93.4, 86.5, 68.0, 21.5, 20.2; IR (film): 3192, 1501, 1369, 1347, 1311, 1228, 1167, 1022, 811, 758, 689, 579  $\text{cm}^{-1}$ ; HRMS-ESI ( $m/z$ ) calcd. for  $\text{C}_{24}\text{H}_{23}\text{N}_2\text{O}_3\text{S}$   $[\text{M}+\text{H}]^+$  419.1429, found: 419.1428.

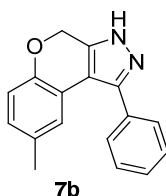

**8-Methyl-1-phenyl-3,4-dihydrochromeno[3,4-c]pyrazole (7b)**

White solid (91%); m.p. = 169-171 °C;  $^1\text{H}$  NMR (400 MHz,  $\text{CDCl}_3$ )  $\delta$  7.63-7.61 (m, 2H), 7.52-7.50 (m, 3H), 7.16 (s, 1H), 6.91 (s, 2H), 5.12 (s, 2H), 2.17 (s, 3H);  $^{13}\text{C}$  NMR (100 MHz,  $\text{CDCl}_3$ )  $\delta$  150.4, 146.7, 138.9, 131.2, 130.1, 129.4, 129.1, 128.5, 128.1, 123.4, 119.5, 117.3, 109.5, 63.8, 20.9; IR (film): 3154, 3065, 2920, 1493, 1440, 1234, 1210, 1009, 819, 767, 698, 553  $\text{cm}^{-1}$ ; HRMS-EI ( $m/z$ ) calcd. for  $\text{C}_{17}\text{H}_{14}\text{N}_2\text{O}$   $[\text{M}]^+$  262.1106, found: 262.1104.

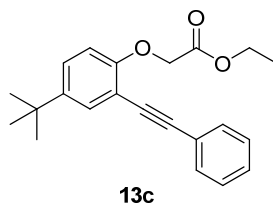

**Ethyl 2-(4-*tert*-butyl-2-(phenylethynyl)phenoxy)acetate (13c)**

Light yellow solid (90%); m.p. = 72-73 °C;  $^1\text{H}$  NMR (400 MHz,  $\text{CDCl}_3$ )  $\delta$  7.59-7.57 (m, 2H), 7.53 (m, 1H), 7.34-7.27 (m, 4H), 6.77 (d,  $J = 8.4$  Hz, 1H), 4.73 (s, 2H), 4.27 (q,  $J = 7.2$  Hz, 2H), 1.31-1.27 (m, 12H);  $^{13}\text{C}$  NMR (100 MHz,  $\text{CDCl}_3$ )  $\delta$  169.0, 156.3, 144.6, 131.7, 130.7, 128.3, 128.2, 126.7, 123.6, 112.9, 112.8, 93.4, 86.0, 66.6, 61.4, 34.2, 31.4, 14.2; IR (film): 2960, 1756, 1523, 1298, 1257, 1222, 816, 762, 693  $\text{cm}^{-1}$ ; HRMS-ESI ( $m/z$ ) calcd. for  $\text{C}_{22}\text{H}_{25}\text{O}_3$   $[\text{M}+\text{H}]^+$  337.1804, found: 337.1801.

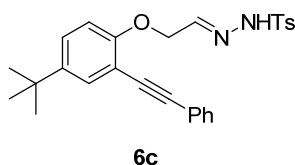

**(*E*)-N'-(2-(4-*tert*-butyl-2-(phenylethynyl)phenoxy)ethylidene)-4-methylbenzenesulfonylhydrazide (6c)**

White solid (63%); m.p. = 119-120 °C;  $^1\text{H}$  NMR (400 MHz,  $\text{DMSO-d}_6$ )  $\delta$  11.47 (br s, 1H), 7.73 (d,  $J = 8.4$  Hz, 2H), 7.51-7.38 (m, 9H), 7.23 (dd,  $J = 8.8, 2.0$  Hz, 1H), 6.88 (d,  $J = 8.8$  Hz, 1H), 4.69 (d,  $J = 4.8$  Hz, 2H), 2.37 (s, 3H), 1.26 (s, 9H);  $^{13}\text{C}$  NMR (100 MHz,  $\text{DMSO-d}_6$ )  $\delta$  156.6, 146.2, 143.9, 136.6, 131.8, 131.7, 130.3, 130.2, 129.2, 129.1, 127.7, 127.5, 123.3, 113.1, 111.7, 93.2, 86.8, 68.0, 34.3, 31.6, 21.5; IR (film): 3163, 2957, 1501, 1344, 1240, 1161, 1070, 1018, 890, 804, 753, 689, 581, 583  $\text{cm}^{-1}$ ; HRMS-ESI ( $m/z$ ) calcd. for  $\text{C}_{27}\text{H}_{29}\text{N}_2\text{O}_3\text{S}$   $[\text{M}+\text{H}]^+$  461.1899, found: 461.1894.

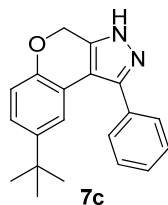

**8-Tert-butyl-1-phenyl-3,4-dihydrochromeno[3,4-c]pyrazole (7c)**

White solid (90%); m.p. = 168-169 °C;  $^1\text{H}$  NMR (400 MHz,  $\text{CDCl}_3$ )  $\delta$  7.67-7.63 (m, 2H), 7.53-7.49 (m, 3H), 7.39 (d,  $J$  = 3.2 Hz, 1H), 7.11 (dd,  $J$  = 10.8, 2.8 Hz, 1H), 6.91 (d,  $J$  = 11.2 Hz, 1H), 4.91 (s, 2H), 1.16 (s, 9H);  $^{13}\text{C}$  NMR (100 MHz,  $\text{CDCl}_3$ )  $\delta$  150.1, 146.6, 144.5, 138.5, 129.9, 129.3, 128.9, 128.3, 124.4, 120.0, 118.8, 116.7, 109.7, 63.9, 34.2, 31.3; IR (film): 3153, 3063, 2956, 2903, 2867, 1492, 1439, 1360, 1235, 1215, 1008, 820, 767, 700  $\text{cm}^{-1}$ ; HRMS-EI ( $m/z$ ) calcd. for  $\text{C}_{20}\text{H}_{20}\text{N}_2\text{O}$  [ $\text{M}$ ] $^+$  304.1576, found: 304.1574.

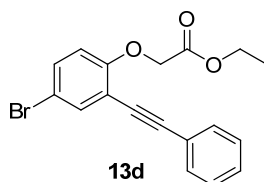

**Ethyl 2-(4-bromo-2-(phenylethynyl)phenoxy)acetate (13d)**

Yellow solid (91%); m.p. = 39-41 °C;  $^1\text{H}$  NMR (400 MHz,  $\text{CDCl}_3$ )  $\delta$  7.62-7.62 (m, 1H), 7.56-7.54 (m, 2H), 7.36-7.33 (m, 4H), 6.69 (d,  $J$  = 8.8 Hz, 1H), 4.70 (s, 2H), 4.26 (q,  $J$  = 7.1 Hz, 2H), 1.28 (t,  $J$  = 7.2 Hz, 3H);  $^{13}\text{C}$  NMR (100 MHz,  $\text{CDCl}_3$ )  $\delta$  168.4, 157.7, 136.0, 132.3, 131.8, 128.7, 128.4, 123.1, 115.8, 114.8, 113.9, 95.3, 84.1, 66.6, 61.6, 14.3; IR (film): 3477, 1716, 1496, 1307, 1268, 1235, 1118, 1019, 799, 751, 685  $\text{cm}^{-1}$ ; HRMS-ESI ( $m/z$ ) calcd. for  $\text{C}_{18}\text{H}_{15}\text{BrO}_3\text{Na}$  [ $\text{M}+\text{Na}$ ] $^+$  381.0102, found: 381.0106.

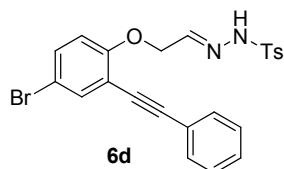

**(E)-N'-(2-(4-bromo-2-(phenylethynyl)phenoxy)ethylidene)-4-methylbenzenesulfonohydrazide (6d)**

White solid (56%); m.p. = 136-137 °C;  $^1\text{H}$  NMR (400 MHz,  $\text{DMSO}-d_6$ )  $\delta$  11.48 (br s, 1H), 7.69-7.64 (m, 3H), 7.53-7.51 (m, 2H), 7.45-7.44 (m, 3H), 7.41-7.34 (m, 4H), 6.90 (d,  $J$  = 9.2 Hz,

1H), 4.73 (d,  $J = 4.8$  Hz, 2H), 2.38 (s, 3H);  $^{13}\text{C}$  NMR (100 MHz, DMSO- $d_6$ )  $\delta$  157.9, 145.4, 143.9, 136.5, 135.3, 133.0, 131.8, 130.2, 129.5, 129.2, 127.6, 122.7, 115.4, 114.5, 112.5, 95.0, 84.8, 68.0, 21.5; IR (film): 3180, 1479, 1345, 1310, 1225, 1166, 1015, 882, 811, 756, 686, 578, 535  $\text{cm}^{-1}$ ; HRMS-ESI ( $m/z$ ) calcd. for  $\text{C}_{23}\text{H}_{20}\text{BrN}_2\text{O}_3\text{S}$   $[\text{M}+\text{H}]^+$  483.0378, found: 483.0378.

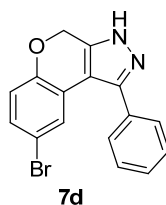

#### 8-Bromo-1-phenyl-3,4-dihydrochromeno[3,4-c]pyrazole (7d)

White solid (89%); m.p. = 189-191  $^{\circ}\text{C}$ ;  $^1\text{H}$  NMR (400 MHz,  $\text{CDCl}_3$ )  $\delta$  7.59-7.52 (m, 5H), 7.39 (d,  $J = 2.4$  Hz, 1H), 7.15 (dd,  $J = 8.8, 2.8$  Hz, 1H), 6.83 (d,  $J = 8.8$  Hz, 1H), 4.85 (s, 2H);  $^{13}\text{C}$  NMR (100 MHz,  $\text{CDCl}_3$ )  $\delta$  151.5, 146.3, 139.3, 130.2, 129.8, 129.4, 129.3, 128.3, 125.4, 121.6, 119.2, 114.3, 108.5, 63.9; IR (film): 3151, 3061, 2903, 1513, 1468, 1432, 1392, 1262, 1236, 1213, 809, 787, 700  $\text{cm}^{-1}$ ; HRMS-EI ( $m/z$ ) calcd. for  $\text{C}_{16}\text{H}_{11}\text{BrN}_2\text{O}$   $[\text{M}]^+$  326.0055, found: 326.0056.

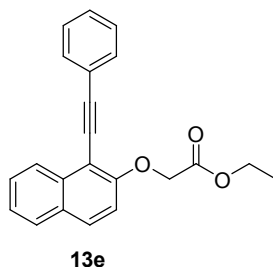

#### Ethyl 2-(1-(phenylethynyl)naphthalen-2-yloxy)acetate (13e)

White solid (82%); m.p. = 54-56  $^{\circ}\text{C}$ ;  $^1\text{H}$  NMR (400 MHz,  $\text{CDCl}_3$ )  $\delta$  8.38 (d,  $J = 8.0$  Hz, 1H), 7.80 (d,  $J = 9.2$  Hz, 2H), 7.67 (d,  $J = 7.6$  Hz, 2H), 7.57-7.55 (m, 1H), 7.44-7.35 (m, 4H), 7.19 (d,  $J = 9.2$  Hz, 1H), 4.91 (s, 2H), 4.27 (q,  $J = 7.1$  Hz, 2H), 1.28 (t,  $J = 7.2$  Hz, 3H);  $^{13}\text{C}$  NMR (100 MHz,  $\text{CDCl}_3$ )  $\delta$  169.0, 157.6, 134.5, 131.7, 130.1, 129.4, 128.4, 128.4, 128.2, 127.5, 125.6, 124.9, 123.7, 115.5, 108.2, 99.7, 83.6, 67.4, 61.4, 14.2; IR (film): 3082, 2976, 1764, 1588, 1508, 1274, 1207, 1107, 1027, 802, 747  $\text{cm}^{-1}$ ; HRMS-ESI ( $m/z$ ) calcd. for  $\text{C}_{22}\text{H}_{18}\text{O}_3\text{Na}$   $[\text{M}+\text{Na}]^+$  353.1154, found: 353.1149.



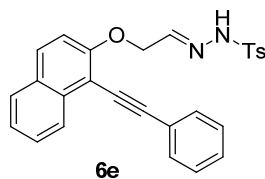

**(E)-4-Methyl-N'-(2-(1-(phenylethynyl)naphthalen-2-yloxy)ethylidene)benzenesulfonohydrazide (6e)**

White solid, (72%); m.p. = 129-130 °C;  $^1\text{H}$  NMR (400 MHz, DMSO- $d_6$ )  $\delta$  11.52 (br s, 1H), 8.26 (d,  $J$  = 8.4 Hz, 1H), 7.94 (d,  $J$  = 8.0 Hz, 1H), 7.87 (d,  $J$  = 9.2 Hz, 1H), 7.70-7.63 (m, 5H), 7.53-7.48 (m, 5H), 7.36 (d,  $J$  = 9.2 Hz, 1H), 7.31 (d,  $J$  = 7.6 Hz, 2H), 4.91 (d,  $J$  = 4.8 Hz, 2H), 2.33 (s, 3H);  $^{13}\text{C}$  NMR (100 MHz, DMSO- $d_6$ )  $\delta$  157.9, 146.0, 143.9, 136.5, 134.0, 131.7, 130.9, 130.1, 129.3, 129.2, 128.8, 128.3, 127.5, 125.1, 125.0, 123.3, 115.2, 106.2, 99.2, 84.4, 68.5, 21.4; IR (film): 3190, 1345, 1308, 1270, 1167, 1035, 1019, 914, 809, 749, 687, 582, 599  $\text{cm}^{-1}$ ; HRMS-ESI (m/z) calcd. for  $\text{C}_{27}\text{H}_{23}\text{N}_2\text{O}_3\text{S}$   $[\text{M}+\text{H}]^+$  455.1429, found: 455.1436.

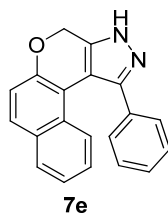

**1-Phenyl-3,4-dihydrobenzo[5,6]chromeno[3,4-c]pyrazole (7e)**

White solid (90%); m.p. = 222-224 °C;  $^1\text{H}$  NMR (400 MHz,  $\text{CDCl}_3$ )  $\delta$  7.78 (d,  $J$  = 8.0 Hz, 1H), 7.72 (d,  $J$  = 8.8 Hz, 1H), 7.43-7.24 (m, 8H), 6.94 (t,  $J$  = 7.6 Hz, 1H), 4.99 (s, 2H);  $^{13}\text{C}$  NMR (100 MHz,  $\text{CDCl}_3$ )  $\delta$  152.3, 148.9, 139.2, 131.0, 130.3, 129.0, 128.7, 128.5, 128.4, 128.4, 128.1, 126.7, 125.2, 123.9, 118.8, 114.5, 109.1, 64.1; IR (film): 3281, 1492, 1475, 1227, 1041, 989, 818, 766, 748, 720, 697  $\text{cm}^{-1}$ ; HRMS-EI (m/z) calcd. for  $\text{C}_{20}\text{H}_{14}\text{N}_2\text{O}$   $[\text{M}]^+$  298.1106, found: 298.1107.

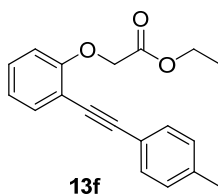

**Ethyl 2-(2-(*p*-tolylethynyl)phenoxy)acetate (13f)**

Yellow oil (84%);  $^1\text{H NMR}$  (400 MHz,  $\text{CDCl}_3$ )  $\delta$  7.49-7.44 (m, 3H), 7.22-7.17 (m, 1H), 7.11-7.09 (d,  $J = 8.8$  Hz, 2H), 6.93 (t,  $J = 7.4$  Hz, 1H), 6.76 (d,  $J = 8.0$  Hz, 1H), 4.67 (s, 2H), 4.20 (q,  $J = 7.2$  Hz, 2H), 2.30 (s, 3H), 1.22 (t,  $J = 7.0$  Hz, 3H);  $^{13}\text{C NMR}$  (100 MHz,  $\text{CDCl}_3$ )  $\delta$  168.7, 158.4, 138.3, 133.6, 131.6, 129.5, 129.1, 121.8, 120.6, 113.8, 113.1, 94.3, 84.9, 66.3, 61.3, 21.5, 14.2; IR (film): 2982, 2924, 1760, 1512, 1488, 1450, 1300, 1197, 1112, 818, 752  $\text{cm}^{-1}$ ; HRMS-ESI ( $m/z$ ) calcd. for  $\text{C}_{19}\text{H}_{19}\text{O}_3$  [ $\text{M}+\text{H}$ ] $^+$  295.1334, found: 295.1329.

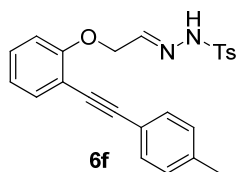

**(*E*)-4-Methyl-*N'*-(2-(2-(*p*-tolylethynyl)phenoxy)ethylidene)benzenesulfonohydrazide (6f)**

White solid (59%); m.p. = 113-114  $^\circ\text{C}$ ;  $^1\text{H NMR}$  (400 MHz,  $\text{DMSO-d}_6$ )  $\delta$  11.48 (br s, 1H), 7.72 (d,  $J = 8.0$  Hz, 2H), 7.47-7.36 (m, 6H), 7.24-7.22 (m, 3H), 6.97-6.94 (m, 2H), 4.71 (d,  $J = 4.8$  Hz, 2H), 2.36 (s, 3H), 2.34 (s, 3H);  $^{13}\text{C NMR}$  (100 MHz,  $\text{DMSO}$ )  $\delta$  158.6, 146.0, 143.9, 138.8, 136.5, 133.5, 131.6, 130.4, 130.1, 129.8, 127.6, 121.6, 120.2, 113.4, 112.5, 93.9, 85.7, 67.8, 21.5, 21.5; IR (film): 3181, 1446, 1347, 1309, 1221, 1165, 1016, 918, 816, 753, 576  $\text{cm}^{-1}$ ; HRMS-ESI ( $m/z$ ) calcd. for  $\text{C}_{24}\text{H}_{23}\text{N}_2\text{O}_3\text{S}$  [ $\text{M}+\text{H}$ ] $^+$  419.1429, found: 419.1429.

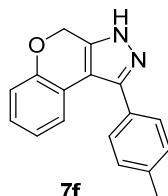

**1-*p*-tolyl-3,4-dihydrochromeno[3,4-*c*]pyrazole (7f)**

White solid (93%); m.p. = 174-176  $^\circ\text{C}$ ;  $^1\text{H NMR}$  (400 MHz,  $\text{CDCl}_3$ )  $\delta$  7.53 (d,  $J = 7.6$  Hz, 2H), 7.39 (d,  $J = 7.6$  Hz, 1H), 7.33 (d,  $J = 7.6$  Hz, 2H), 7.13 (t,  $J = 7.6$  Hz, 1H), 7.03 (d,  $J = 8.0$  Hz, 1H), 6.87 (t,  $J = 7.4$  Hz, 1H), 4.97 (s, 2H), 2.48 (s, 3H);  $^{13}\text{C NMR}$  (100 MHz,  $\text{CDCl}_3$ )  $\delta$  152.6, 146.5,

139.4, 139.0, 129.8, 128.3, 127.4, 127.1, 123.0, 121.9, 119.8, 117.5, 109.2, 64.0, 21.4; IR (film): 3148, 3067, 2920, 1522, 1431, 1209, 1027, 820, 753  $\text{cm}^{-1}$ ; HRMS-EI (m/z) calcd. for  $\text{C}_{17}\text{H}_{14}\text{N}_2\text{O}$   $[\text{M}]^+$  262.1106, found: 262.1107.

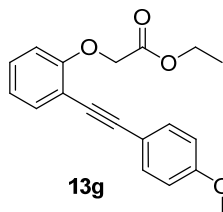

**Ethyl 2-(2-((4-methoxyphenyl)ethynyl)phenoxy)acetate (13g)**

Yellow oil (89%);  $^1\text{H}$  NMR (400 MHz,  $\text{CDCl}_3$ )  $\delta$  7.52-7.48 (m, 3H), 7.25-7.21 (m, 1H), 6.97 (td,  $J = 7.6, 0.8$  Hz, 1H), 6.87-6.85 (m, 2H), 6.81 (dd,  $J = 8.4, 0.8$  Hz, 1H), 4.72 (s, 2H), 4.25 (q,  $J = 7.2$  Hz, 2H), 3.78 (s, 3H), 1.27 (t,  $J = 7.2$  Hz, 3H);  $^{13}\text{C}$  NMR (100 MHz,  $\text{CDCl}_3$ )  $\delta$  168.7, 159.7, 158.3, 133.5, 133.1, 129.3, 121.8, 115.7, 114.0, 113.9, 113.1, 94.1, 84.1, 66.4, 61.3, 55.3, 14.2; IR (film): 2933, 1759, 1606, 1512, 1488, 1449, 1287, 1249, 1198, 1111, 1029, 834, 753  $\text{cm}^{-1}$ ; HRMS-ESI (m/z) calcd. for  $\text{C}_{19}\text{H}_{19}\text{O}_4$   $[\text{M}+\text{H}]^+$  311.1283, found: 311.1278.

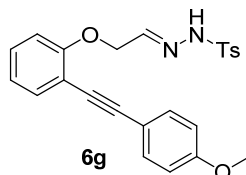

**(E)-N'-(2-(2-((4-methoxyphenyl)ethynyl)phenoxy)ethylidene)-4-methylbenzenesulfonohydrazide (6g)**

White solid (63%); m.p. = 120-121  $^{\circ}\text{C}$ ;  $^1\text{H}$  NMR (400 MHz,  $\text{DMSO-d}_6$ )  $\delta$  11.49 (br s, 1H), 7.72 (d,  $J = 8.4$  Hz, 2H), 7.47-7.44 (m, 4H), 7.37 (d,  $J = 8.4$  Hz, 2H), 7.24-7.20 (m, 1H), 7.00-6.94 (m, 4H), 4.71 (d,  $J = 4.8$  Hz, 2H), 3.80 (s, 3H), 2.37 (s, 3H);  $^{13}\text{C}$  NMR (100 MHz,  $\text{DMSO-d}_6$ )  $\delta$  160.0, 158.5, 146.0, 143.9, 136.6, 133.4, 133.3, 130.2, 130.2, 127.6, 121.6, 115.2, 114.8, 113.4, 112.8, 93.8, 84.9, 67.9, 55.7, 21.5; IR (film): 3195, 1512, 1452, 1346, 1310, 1250, 1224, 1166, 1016, 831, 757, 703, 577  $\text{cm}^{-1}$ ; HRMS-ESI (m/z) calcd. for  $\text{C}_{24}\text{H}_{23}\text{N}_2\text{O}_4\text{S}$   $[\text{M}+\text{H}]^+$  435.1379, found: 435.1371.

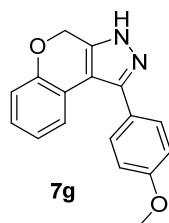

**1-(4-Methoxyphenyl)-3,4-dihydrochromeno[3,4-c]pyrazole (7g)**

White solid (86%); m.p. = 164-166 °C;  $^1\text{H}$  NMR (400 MHz,  $\text{CDCl}_3$ )  $\delta$  7.53-7.51 (d,  $J$  = 8.4 Hz, 2H), 7.37-7.35 (m, 1H), 7.12-7.08 (m, 1H), 7.02-6.99 (m, 3H), 6.86 (t,  $J$  = 7.6 Hz, 1H), 4.95 (s, 2H), 3.87 (s, 3H);  $^{13}\text{C}$  NMR (100 MHz,  $\text{CDCl}_3$ )  $\delta$  160.4, 152.5, 146.3, 138.9, 129.8, 127.4, 122.9, 122.2, 122.0, 119.9, 117.5, 114.5, 109.1, 64.0, 55.4; IR (film): 3143, 2906, 1595, 1515, 1488, 1434, 1295, 1249, 1205, 1095, 1028, 831, 755  $\text{cm}^{-1}$ ; HRMS-EI (m/z) calcd. for  $\text{C}_{17}\text{H}_{14}\text{N}_2\text{O}_2$   $[\text{M}]^+$  278.1055, found: 278.1059.

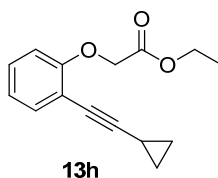

**Ethyl 2-(2-(cyclopropylethynyl)phenoxy)acetate (13h)**

Light yellow oil (82%);  $^1\text{H}$  NMR (400 MHz,  $\text{CDCl}_3$ )  $\delta$  7.34 (dd,  $J$  = 7.6, 1.6 Hz, 1H), 7.18-7.13 (m, 1H), 6.90-6.86 (m, 1H), 6.73 (dd,  $J$  = 8.0, 0.8 Hz, 1H), 4.65 (s, 2H), 4.23 (q,  $J$  = 7.2 Hz, 2H), 1.51-1.46 (m, 1H), 1.26 (t,  $J$  = 7.2 Hz, 3H), 0.88-0.81 (m, 4H);  $^{13}\text{C}$  NMR (100 MHz,  $\text{CDCl}_3$ )  $\delta$  168.1, 158.0, 133.1, 128.1, 121.1, 113.5, 112.4, 97.6, 70.9, 65.7, 60.6, 13.6, 8.19, -0.01; IR (film): 2982, 2929, 2230, 1760, 1492, 1450, 1301, 1128, 1128, 752  $\text{cm}^{-1}$ ; HRMS-ESI (m/z) calcd. for  $\text{C}_{15}\text{H}_{17}\text{O}_3$   $[\text{M}+\text{H}]^+$  245.1178, found: 245.1183.

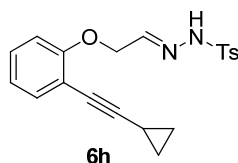

**N'-(2-(2-(cyclopropylethynyl)phenoxy)ethylidene)-4-methylbenzenesulfonohydrazide (6h)**

White solid (65%); m.p. = 101-103 °C;  $^1\text{H}$  NMR (400 MHz,  $\text{DMSO-d}_6$ )  $\delta$  11.47 (br s, 1H), 7.72 (d,  $J$  = 8.0 Hz, 2H), 7.41-7.39 (m, 3H), 7.28 (d,  $J$  = 7.2 Hz, 1H), 7.13 (t,  $J$  = 7.6 Hz, 1H), 6.90-6.85 (m, 2H), 4.63 (d,  $J$  = 4.8 Hz, 2H), 2.39 (s, 3H), 1.54-1.50 (m, 1H), 0.88-0.86 (m, 2H), 0.69-0.69

(m, 2H);  $^{13}\text{C}$  NMR (100 MHz,  $\text{DMSO-d}_6$ )  $\delta$  158.7, 146.0, 144.0, 136.5, 133.6, 130.2, 129.4, 127.6, 121.4, 113.2, 113.2, 98.2, 72.2, 67.7, 21.5, 9.0, 0.58; IR (film): 3195, 1492, 1446, 1345, 1311, 1221, 1166, 1009, 814, 752, 576  $\text{cm}^{-1}$ ; HRMS-ESI (m/z) calcd. for  $\text{C}_{20}\text{H}_{21}\text{N}_2\text{O}_3\text{S}$   $[\text{M}+\text{H}]^+$  369.1273, found: 369.1262.

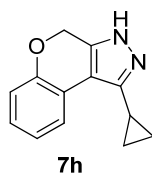

### 1-Cyclopropyl-3,4-dihydrochromeno[3,4-c]pyrazole (7h)

White solid (87%); m.p. = 154-156  $^{\circ}\text{C}$ ;  $^1\text{H}$  NMR (400 MHz,  $\text{CDCl}_3$ )  $\delta$  7.66 (d,  $J = 7.6$  Hz, 1H), 7.15-7.11 (m, 1H), 7.04-7.00 (m, 2H), 5.27 (s, 2H), 2.08-2.01 (m, 1H), 1.09-1.04 (m, 2H), 0.84-0.80 (m, 2H);  $^{13}\text{C}$  NMR (100 MHz,  $\text{CDCl}_3$ )  $\delta$  152.1, 145.4, 140.2, 127.1, 123.6, 122.0, 120.0, 117.1, 110.5, 64.2, 6.5; IR (film): 3134, 3004, 2934, 2889, 1594, 1523, 1437, 1229, 1200, 1113, 1035, 816, 757  $\text{cm}^{-1}$ ; HRMS-ESI (m/z) calcd. for  $\text{C}_{13}\text{H}_{13}\text{N}_2\text{O}$   $[\text{M}+\text{H}]^+$  213.1028, found: 213.1019.

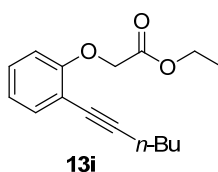

### Ethyl 2-(2-(hex-1-ynyl)phenoxy)acetate (13i)

Yellow oil (86%);  $^1\text{H}$  NMR (400 MHz,  $\text{CDCl}_3$ )  $\delta$  7.37 (dd,  $J = 7.6, 1.6$  Hz, 1H), 7.19-7.15 (m, 1H), 6.93-6.89 (m, 1H), 6.76 (dd,  $J = 8.0, 0.8$  Hz, 1H), 4.68 (s, 2H), 4.23 (q,  $J = 7.2$  Hz, 2H), 2.45 (t,  $J = 7.0$  Hz, 2H), 1.64-1.46 (m, 4H), 1.26 (t,  $J = 7.2$  Hz, 3H), 0.94 (t,  $J = 7.2$  Hz, 3H);  $^{13}\text{C}$  NMR (100 MHz,  $\text{CDCl}_3$ )  $\delta$  168.8, 158.4, 133.8, 128.6, 121.7, 114.3, 113.1, 95.1, 76.4, 66.4, 61.2, 30.9, 22.0, 19.4, 14.1, 13.6; IR (film): 2959, 2932, 2232, 1761, 1491, 1450, 1194, 1124, 1074, 752  $\text{cm}^{-1}$ ; HRMS-ESI (m/z) calcd. for  $\text{C}_{16}\text{H}_{21}\text{O}_3$   $[\text{M}+\text{H}]^+$  261.1491, found: 261.1492.

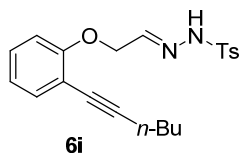

**(E)-N'-(2-(2-(hex-1-ynyl)phenoxy)ethylidene)-4-methylbenzenesulfonylhydrazide (6i)**

White solid (50%); m.p. = 102-104 °C; <sup>1</sup>H NMR (400 MHz, DMSO-d<sub>6</sub>) δ 11.48 (br s, 1H), 7.71 (d, *J* = 8.0 Hz, 2H), 7.39-7.37 (m, 3H), 7.30-7.28 (m, 1H), 7.14-7.11 (m, 1H), 6.91-6.86 (m, 2H), 4.62 (d, *J* = 5.2 Hz, 2H), 2.41-2.38 (m, 5H), 1.51-1.39 (m, 4H), 0.89 (t, *J* = 7.2 Hz, 3H); <sup>13</sup>C NMR (100 MHz, DMSO-d<sub>6</sub>) δ 158.6, 145.8, 143.9, 136.6, 133.5, 130.2, 129.5, 127.6, 121.4, 113.4, 113.2, 95.0, 77.3, 67.8, 30.8, 21.8, 21.5, 19.1, 13.9; IR (film): 3193, 2962, 1492, 1457, 1349, 1311, 1167, 1066, 1009, 921, 748, 676, 575 cm<sup>-1</sup>; HRMS-ESI (*m/z*) calcd. for C<sub>21</sub>H<sub>25</sub>N<sub>2</sub>O<sub>3</sub>S [M+H]<sup>+</sup> 385.1586, found: 385.1593.

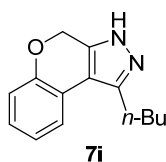

**1-Butyl-3,4-dihydrochromeno[3,4-c]pyrazole (7i)**

**6i** (384 mg, 1.0 mmol) was dissolved in CH<sub>2</sub>Cl<sub>2</sub> (10 mL), cooled with ice-water. A solution of BF<sub>3</sub>·Et<sub>2</sub>O (48%, 0.1 mL, 0.3 mmol) in CH<sub>2</sub>Cl<sub>2</sub> (2 mL) was added in dropwise. After the addition, the solution was stirred at r.t. for 24 h. The reaction was quenched with saturated NaHCO<sub>3</sub> (5 mL), and extracted with CH<sub>2</sub>Cl<sub>2</sub> for 3 times, washed with brine, dried over Na<sub>2</sub>SO<sub>4</sub>, concentrated in vacuum. The residue was purified by chromatography (PE:EA = 5:1), affording white solid (148 mg, 65%); m.p. = 115-117 °C; <sup>1</sup>H NMR (400 MHz, CDCl<sub>3</sub>) δ 7.38 (d, *J* = 8.0 Hz, 1H), 7.14-7.10 (m, 1H), 7.02-6.99 (m, 2H), 5.25 (s, 2H), 2.90 (t, *J* = 7.8 Hz, 2H), 1.75-1.67 (m, 2H), 1.46-1.40 (m, 2H), 0.95 (t, *J* = 7.4 Hz, 3H); <sup>13</sup>C NMR (100 MHz, CDCl<sub>3</sub>) δ 152.3, 145.6, 139.6, 127.0, 122.9, 122.1, 120.2, 117.4, 108.7, 64.2, 30.7, 25.7, 22.5, 13.8; IR (film): 3135, 3071, 2930, 2857, 1595, 1527, 1461, 1430, 1205, 1117, 1062, 1041, 756 cm<sup>-1</sup>; HRMS-ESI (*m/z*) calcd. for C<sub>14</sub>H<sub>17</sub>N<sub>2</sub>O [M+H]<sup>+</sup> 229.1341, found: 229.1337.

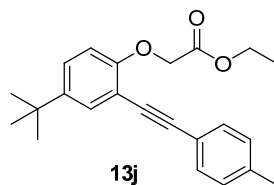

**Ethyl 2-(4-*tert*-butyl-2-(*p*-tolylethynyl)phenoxy)acetate (13j)**

Light yellow solid (92%); m.p. = 68-69 °C;  $^1\text{H}$  NMR (400 MHz,  $\text{CDCl}_3$ )  $\delta$  7.52 (d,  $J$  = 2.8 Hz, 1H), 7.48-7.46 (m, 2H), 7.26 (dd,  $J$  = 8.8, 2.8 Hz, 1H), 7.15-7.13 (m, 2H), 6.77 (d,  $J$  = 8.8 Hz, 1H), 4.72 (s, 2H), 4.26 (q,  $J$  = 7.1 Hz, 2H), 2.36 (s, 3H), 1.30-1.27 (m, 12H);  $^{13}\text{C}$  NMR (100 MHz,  $\text{CDCl}_3$ )  $\delta$  169.0, 156.3, 144.7, 138.2, 131.6, 130.7, 129.1, 126.4, 120.5, 113.2, 113.1, 93.6, 85.3, 66.7, 61.3, 34.2, 31.4, 21.5, 14.2; IR (film): 2961, 1761, 1513, 1496, 1198, 1109, 817  $\text{cm}^{-1}$ ; HRMS-ESI ( $m/z$ ) calcd. for  $\text{C}_{23}\text{H}_{27}\text{O}_3$  [ $\text{M}+\text{H}$ ] $^+$  351.1960, found: 351.1963.

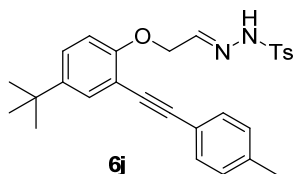

**(*E*)-N'-(2-(4-*tert*-butyl-2-(*p*-tolylethynyl)phenoxy)ethylidene)-4-methylbenzenesulfonohydrazide (6j)**

White solid (69%); m.p. = 128-129 °C;  $^1\text{H}$  NMR (400 MHz,  $\text{DMSO-d}_6$ )  $\delta$  11.47 (br s, 1H), 7.75 (d,  $J$  = 8.0 Hz, 2H), 7.45-7.38 (m, 6H), 7.24-7.22 (m, 3H), 6.88 (d,  $J$  = 8.8 Hz, 1H), 4.69 (d,  $J$  = 4.4 Hz, 2H), 2.37 (s, 3H), 2.34 (s, 3H), 1.26 (s, 9H);  $^{13}\text{C}$  NMR (100 MHz,  $\text{DMSO-d}_6$ )  $\delta$  156.5, 146.2, 143.9, 143.8, 138.8, 136.7, 131.6, 130.2, 130.1, 129.8, 127.7, 127.2, 120.3, 113.2, 112.0, 93.4, 86.2, 68.0, 34.2, 31.6, 21.5; IR (film): 3167, 2924, 1450, 1380, 1348, 1246, 1162, 1029, 819, 670  $\text{cm}^{-1}$ ; HRMS-ESI ( $m/z$ ) calcd. for  $\text{C}_{28}\text{H}_{29}\text{N}_2\text{O}_3\text{S}$  [ $\text{M}-\text{H}$ ] $^+$  473.1899, found: 473.1909.

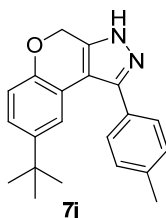

**8-*Tert*-butyl-1-*p*-tolyl-3,4-dihydrochromeno[3,4-*c*]pyrazole (7j)**

White solid (91%); m.p. = 139-141 °C;  $^1\text{H}$  NMR (400 MHz,  $\text{CDCl}_3$ )  $\delta$  7.55 (d,  $J$  = 8.0 Hz, 2H), 7.47 (d,  $J$  = 2.0 Hz, 1H), 7.31 (d,  $J$  = 8.0 Hz, 2H), 7.13 (dd,  $J$  = 8.4, 2.4 Hz, 1H), 6.94 (d,  $J$  = 8.8

Hz, 1H), 4.96 (s, 2H), 2.46 (s, 3H), 1.21 (s, 9H);  $^{13}\text{C}$  NMR (100 MHz,  $\text{CDCl}_3$ )  $\delta$  150.3, 146.7, 144.6, 139.3, 138.7, 129.6, 128.2, 127.1, 124.3, 120.2, 119.1, 116.8, 109.6, 64.1, 34.3, 31.4, 21.5; IR (film): 3149, 3063, 2957, 2902, 2866, 1492, 1217, 1134, 1012, 821, 733  $\text{cm}^{-1}$ ; HRMS-EI ( $m/z$ ) calcd. for  $\text{C}_{21}\text{H}_{22}\text{N}_2\text{O}$  [ $\text{M}$ ] $^+$  318.1732, found: 318.1733.

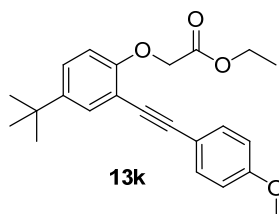

**Ethyl 2-(4-*tert*-butyl-2-((4-methoxyphenyl)ethynyl)phenoxy)acetate (13k)**

Yellow solid (91%); m.p. = 69-71  $^{\circ}\text{C}$ ;  $^1\text{H}$  NMR (400 MHz,  $\text{CDCl}_3$ )  $\delta$  7.52-7.50 (m, 3H), 7.25 (dd,  $J$  = 8.8, 2.4 Hz, 1H), 6.87-6.85 (m, 2H), 6.76 (d,  $J$  = 8.8 Hz, 1H), 4.71 (s, 2H), 4.25 (q,  $J$  = 7.1 Hz, 2H), 3.79 (s, 3H), 1.30-1.26 (m, 12H);  $^{13}\text{C}$  NMR (100 MHz,  $\text{CDCl}_3$ )  $\delta$  169.0, 159.6, 156.2, 144.6, 133.1, 130.5, 126.3, 115.8, 114.0, 113.2, 113.1, 93.5, 84.6, 66.7, 61.3, 55.3, 34.2, 31.4, 14.2; IR (film): 2961, 1760, 1604, 1512, 1497, 1464, 1287, 1249, 1198, 1109, 1030, 833  $\text{cm}^{-1}$ ; HRMS-ESI ( $m/z$ ) calcd. for  $\text{C}_{23}\text{H}_{27}\text{O}_4$  [ $\text{M}+\text{H}$ ] $^+$  367.1909, found: 367.1906.

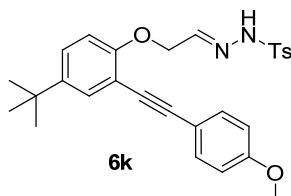

**(*E*)-*N'*-(2-(4-*tert*-butyl-2-((4-methoxyphenyl)ethynyl)phenoxy)ethylidene)-4-methylbenzenesulfonohydrazide (6k)**

White solid (71%); m.p. = 122-123  $^{\circ}\text{C}$ ;  $^1\text{H}$  NMR (400 MHz,  $\text{DMSO-d}_6$ )  $\delta$  11.47 (br s, 1H), 7.74 (d,  $J$  = 8.0 Hz, 2H), 7.47-7.39 (m, 6H), 7.21 (dd,  $J$  = 8.4, 2.0 Hz, 1H), 6.98 (d,  $J$  = 8.8 Hz, 2H), 6.86 (d,  $J$  = 8.8 Hz, 1H), 4.69 (d,  $J$  = 4.4 Hz, 2H), 3.80 (s, 3H), 2.38 (s, 3H), 1.26 (s, 9H);  $^{13}\text{C}$  NMR (100 MHz,  $\text{DMSO-d}_6$ )  $\delta$  159.9, 156.4, 146.3, 143.9, 136.7, 133.3, 130.2, 130.1, 127.7, 127.0, 115.2, 114.8, 113.1, 112.2, 93.4, 85.4, 68.0, 55.7, 34.2, 31.6, 21.5; IR (film): 3185, 2958, 1513, 1452, 1377, 1349, 1289, 1249, 1163, 1031, 816, 669  $\text{cm}^{-1}$ ; HRMS-ESI ( $m/z$ ) calcd. for  $\text{C}_{28}\text{H}_{31}\text{N}_2\text{O}_4\text{S}$  [ $\text{M}+\text{H}$ ] $^+$  491.2005, found: 491.2003.



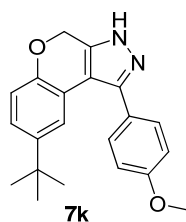

**8-Tert-butyl-1-(4-methoxyphenyl)-3,4-dihydrochromeno[3,4-c]pyrazole (7k)**

White solid (88%); m.p. = 159-161 °C;  $^1\text{H}$  NMR (400 MHz,  $\text{CDCl}_3$ )  $\delta$  7.52 (d,  $J$  = 8.4 Hz, 2H), 7.42 (d,  $J$  = 2.0 Hz, 1H), 7.09 (dd,  $J$  = 8.4, 2.0 Hz, 1H), 6.96 (d,  $J$  = 8.4 Hz, 2H), 6.89 (d,  $J$  = 8.4 Hz, 1H), 4.92 (s, 2H), 3.82 (s, 3H), 1.17 (s, 9H);  $^{13}\text{C}$  NMR (100 MHz,  $\text{CDCl}_3$ )  $\delta$  160.4, 150.2, 146.5, 144.6, 138.7, 129.7, 124.3, 122.3, 120.1, 119.2, 116.8, 114.4, 109.4, 64.0, 55.4, 34.3, 31.4; IR (film): 3184, 2958, 2904, 2866, 1519, 1489, 1460, 1435, 1252, 1215, 1178, 832  $\text{cm}^{-1}$ ; HRMS-EI (m/z) calcd. for  $\text{C}_{21}\text{H}_{22}\text{N}_2\text{O}_2$   $[\text{M}]^+$  334.1681, found: 334.1679.

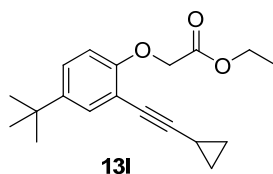

**Ethyl 2-(4-tert-butyl-2-(cyclopropylethynyl)phenoxy)acetate (13I)**

Yellow oil (87%);  $^1\text{H}$  NMR (400 MHz,  $\text{CDCl}_3$ )  $\delta$  7.37 (d,  $J$  = 2.4 Hz, 1H), 7.19 (dd,  $J$  = 8.8, 2.8 Hz, 1H), 6.70 (d,  $J$  = 8.8 Hz, 1H), 4.66 (s, 2H), 4.26 (q,  $J$  = 7.2 Hz, 2H), 1.54-1.47 (m, 1H), 1.31-1.28 (m, 12H), 0.87-0.84 (m, 4H);  $^{13}\text{C}$  NMR (100 MHz,  $\text{CDCl}_3$ )  $\delta$  169.0, 156.4, 144.5, 130.8, 125.6, 113.4, 112.9, 97.5, 72.0, 66.6, 61.2, 34.1, 31.3, 14.2, 8.75, 0.54; IR (film): 2962, 1761, 1736, 1499, 1288, 1197, 1156, 1099, 811  $\text{cm}^{-1}$ ; HRMS-ESI (m/z) calcd. for  $\text{C}_{19}\text{H}_{25}\text{O}_3$   $[\text{M}+\text{H}]^+$  301.1804, found: 301.1803.

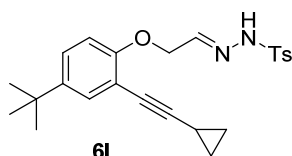

**(E)-N'-(2-(4-tert-butyl-2-(cyclopropylethynyl)phenoxy)ethylidene)-4-methylbenzenesulfonohydrazide (6I)**

White solid (48%); m.p. = 102-104 °C;  $^1\text{H}$  NMR (400 MHz,  $\text{DMSO}-d_6$ )  $\delta$  11.45 (br s, 1H), 7.72 (d,  $J$  = 8.0 Hz, 2H), 7.42 (d,  $J$  = 8.0 Hz, 2H), 7.36 (t,  $J$  = 5.0 Hz, 1H), 7.25 (d,  $J$  = 2.0 Hz, 1H), 7.12

(dd,  $J = 8.8, 2.0$  Hz, 1H), 6.77 (d,  $J = 8.8$  Hz, 1H), 4.60 (d,  $J = 5.2$  Hz, 2H), 2.40 (s, 3H), 1.54-1.50 (m, 1H), 1.22 (s, 9H), 0.89-0.85 (m, 2H), 0.71-0.67 (m, 2H);  $^{13}\text{C}$  NMR (100 MHz, DMSO- $d_6$ )  $\delta$  156.6, 146.3, 143.9, 143.6, 136.6, 130.4, 130.2, 127.7, 126.2, 113.0, 112.6, 97.6, 72.7, 67.9, 34.2, 31.6, 21.6, 8.94, 0.57; IR (film): 3154, 2958, 1499, 1343, 1299, 1274, 1161, 1069, 1022, 921, 886, 804, 576  $\text{cm}^{-1}$ ; HRMS-ESI ( $m/z$ ) calcd. for  $\text{C}_{24}\text{H}_{29}\text{N}_2\text{O}_3\text{S}$   $[\text{M}+\text{H}]^+$  425.1899, found: 425.1898.

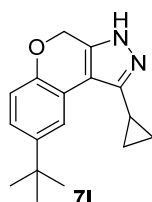

### 8-Tert-butyl-1-cyclopropyl-3,4-dihydrochromeno[3,4-c]pyrazole (71)

Light yellow oil (87%);  $^1\text{H}$  NMR (400 MHz,  $\text{CDCl}_3$ )  $\delta$  7.73 (d,  $J = 2.4$  Hz, 1H), 7.14 (dd,  $J = 8.4, 2.4$  Hz, 1H), 6.92 (d,  $J = 8.4$  Hz, 1H), 5.23 (s, 2H), 2.07-2.03 (m, 1H), 1.34 (s, 9H), 1.10-1.05 (m, 2H), 0.85-0.81 (m, 2H);  $^{13}\text{C}$  NMR (100 MHz,  $\text{CDCl}_3$ )  $\delta$  149.9, 145.4, 144.7, 139.8, 124.0, 120.6, 119.3, 116.5, 110.9, 64.2, 34.3, 31.6, 6.42, 6.30; IR (film): 3181, 2960, 2868, 1727, 1496, 1480, 1264, 1233, 1211, 1129, 1008, 820  $\text{cm}^{-1}$ ; HRMS-EI ( $m/z$ ) calcd. for  $\text{C}_{17}\text{H}_{20}\text{N}_2\text{O}$   $[\text{M}]^+$  268.1576, found: 268.1575.

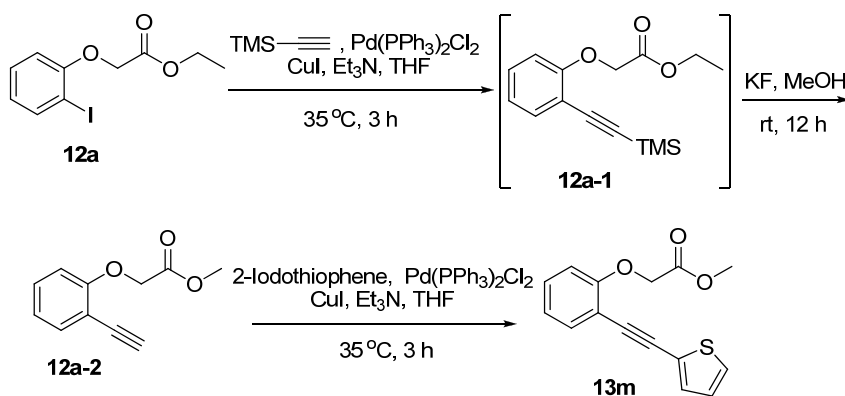

### Methyl 2-(2-(thiophen-2-ylethynyl)phenoxy)acetate (13m)

In an oven dried three necked flask was added **12a** (3.0 g, 10.0 mmol),  $\text{Pd}(\text{PPh}_3)_2\text{Cl}_2$  (70 mg, 0.1 mmol),  $\text{CuI}$  (57 mg, 0.3 mmol), THF (15 mL) and  $\text{Et}_3\text{N}$  (15 mL) successively. The mixture was heated to 35  $^\circ\text{C}$ , and then ethynyltrimethylsilane (2.1 mL, 15.0 mmol) was added dropwise. After the addition, the mixture was stirred for 3 h. The mixture was concentrated in vacuum, and used in next step without further purification.

The residue was dissolved in methanol (50 mL),  $\text{KF}$  (1.4 g, 24.0 mmol) was added, stirred for 12 h

at r.t. Concentrated, and purified by chromatography (PE:EA = 20:1), affording light yellow oil **12a-2** (1.43 g, 75%);  $^1\text{H}$  NMR (400 MHz,  $\text{CDCl}_3$ )  $\delta$  7.48 (d,  $J = 7.6$  Hz, 1H), 7.30-7.26 (m, 1H), 6.98-6.95 (m, 1H), 6.79 (d,  $J = 8.4$  Hz, 1H), 4.75 (s, 2H), 3.79 (s, 3H), 3.33 (s, 1H);  $^{13}\text{C}$  NMR (100 MHz,  $\text{CDCl}_3$ )  $\delta$  169.1, 159.0, 134.4, 130.1, 121.7, 112.5, 112.2, 81.8, 79.6, 66.0, 52.2; IR (film): 3280, 2954, 2107, 1760, 1597, 1489, 1450, 1292, 1211, 1119, 1073, 754  $\text{cm}^{-1}$ ; HRMS-ESI ( $m/z$ ) calcd. for  $\text{C}_{11}\text{H}_{10}\text{O}_3\text{Na}$   $[\text{M}+\text{Na}]^+$  213.0528, found: 213.0519.

In an oven dried three necked flask was added 2-iodothiophene (0.88 mL, 8.0 mmol),  $\text{Pd}(\text{PPh}_3)_2\text{Cl}_2$  (72 mg, 0.1 mmol),  $\text{CuI}$  (38 mg, 0.2 mmol) THF (15 mL) and  $\text{Et}_3\text{N}$  (15 mL) successively. The mixture was heated to 35  $^\circ\text{C}$ , and then a solution of **12a-2** (2.66 g, 14.0 mmol) in THF (5 mL) was added dropwise. After the addition, the mixture was stirred for 3 h. The mixture was concentrated in vacuum, the residue was purified by chromatography (PE:EA = 40:1), affording light yellow oil (1.85 g, 85%);  $^1\text{H}$  NMR (400 MHz,  $\text{CDCl}_3$ )  $\delta$  7.51 (d,  $J = 7.2$  Hz, 1H), 7.33-7.26 (m, 3H), 7.03-6.99 (m, 2H), 6.82 (d,  $J = 8.4$  Hz, 1H), 4.75 (s, 2H), 3.80 (s, 3H);  $^{13}\text{C}$  NMR (100 MHz,  $\text{CDCl}_3$ )  $\delta$  169.2, 158.3, 133.5, 132.0, 129.9, 127.4, 127.2, 123.5, 121.9, 113.2, 112.9, 89.2, 87.2, 66.2, 52.3; IR (film): 2956, 2924, 2853, 1714, 1455, 1261, 1201, 1100, 802  $\text{cm}^{-1}$ ; HRMS-ESI ( $m/z$ ) calcd. for  $\text{C}_{15}\text{H}_{12}\text{O}_3\text{SNa}$   $[\text{M}+\text{Na}]^+$  295.0405, found: 295.0403.

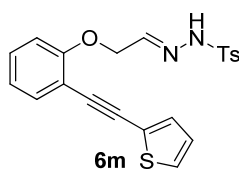

**(E)-4-Methyl-N'-(2-(2-(thiophen-2-ylethynyl)phenoxy)ethylidene)benzenesulfonylhydrazide**  
**(6m)**

White solid (68%); m.p. = 103-105  $^\circ\text{C}$ ;  $^1\text{H}$  NMR (400 MHz,  $\text{DMSO}-d_6$ )  $\delta$  11.47 (br s, 1H), 7.70 (d,  $J = 8.4$  Hz, 2H), 7.66 (d,  $J = 5.2$  Hz, 1H), 7.47-7.36 (m, 5H), 7.27-7.22 (m, 1H), 7.14-7.12 (m, 1H), 7.00-6.95 (m, 2H), 4.71 (d,  $J = 5.2$  Hz, 2H), 2.38 (s, 3H);  $^{13}\text{C}$  NMR (100 MHz,  $\text{DMSO}-d_6$ )  $\delta$  158.5, 145.9, 144.0, 136.5, 133.4, 132.8, 130.8, 130.2, 129.2, 128.2, 127.6, 122.7, 121.6, 113.3, 111.9, 89.9, 86.8, 67.8, 21.5; IR (film): 3196, 1443, 1387, 1345, 1307, 1223, 1163, 1012, 918, 815, 754, 707, 577  $\text{cm}^{-1}$ ; HRMS-ESI ( $m/z$ ) calcd. for  $\text{C}_{21}\text{H}_{19}\text{N}_2\text{O}_3\text{S}_2$   $[\text{M}+\text{H}]^+$  411.0837, found: 411.0837.

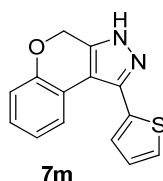

### 1-(Thiophen-2-yl)-3,4-dihydrochromeno[3,4-c]pyrazole (7m)

Grey solid (88%); m.p. = 174-176 °C;  $^1\text{H}$  NMR (400 MHz,  $\text{CDCl}_3$ )  $\delta$  10.42 (br s, 1H), 7.50-7.47 (m, 2H), 7.34 (d,  $J = 3.2$  Hz, 1H), 7.18-7.16 (m, 1H), 7.09 (t,  $J = 7.8$  Hz, 1H), 6.96 (d,  $J = 8.0$  Hz, 1H), 6.86 (t,  $J = 7.6$  Hz, 1H), 4.94 (s, 2H);  $^{13}\text{C}$  NMR (100 MHz,  $\text{CDCl}_3$ )  $\delta$  152.5, 145.9, 132.5, 130.3, 128.5, 128.0, 127.9, 127.6, 123.1, 122.1, 119.3, 117.5, 110.8, 63.7; IR (film): 3147, 3074, 2921, 1533, 1408, 1277, 1205, 1122, 1026, 755, 707  $\text{cm}^{-1}$ ; HRMS-ESI (m/z) calcd. for  $\text{C}_{14}\text{H}_{11}\text{N}_2\text{OS}$   $[\text{M}+\text{H}]^+$  255.0592, found: 255.0590.

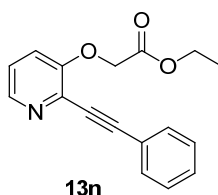

### Ethyl 2-(2-(phenylethynyl)pyridin-3-yloxy)acetate (13n)

Yellow oil (81%);  $^1\text{H}$  NMR (400 MHz,  $\text{CDCl}_3$ )  $\delta$  7.96-7.95 (m, 1H), 7.40-7.38 (m, 2H), 7.09-7.07 (m, 3H), 6.88-6.87 (m, 2H), 4.47 (s, 2H), 3.93 (q,  $J = 7.2$  Hz, 2H), 0.94 (t,  $J = 7.2$  Hz, 3H);  $^{13}\text{C}$  NMR (100 MHz,  $\text{CDCl}_3$ )  $\delta$  167.7, 155.2, 142.6, 133.6, 131.8, 128.8, 128.2, 123.4, 122.4, 119.6, 93.9, 85.4, 65.6, 61.2, 13.9; IR (film): 3057, 2983, 2934, 2221, 1756, 1577, 1492, 1442, 1295, 1201, 1124, 796, 759, 692  $\text{cm}^{-1}$ ; HRMS-ESI (m/z) calcd. for  $\text{C}_{17}\text{H}_{16}\text{NO}_3$   $[\text{M}+\text{H}]^+$  282.1130, found: 282.1131.

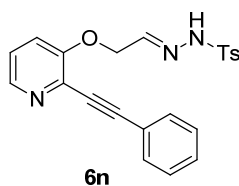

### 4-Methyl-N'-(2-(2-(phenylethynyl)pyridin-3-yloxy)ethylidene)benzenesulfonohydrazide (6n)

White solid (50%); m.p. = 84-85 °C;  $^1\text{H}$  NMR (400 MHz,  $\text{CDCl}_3$ )  $\delta$  8.20-8.18 (m, 1H), 7.78 (d,  $J = 8.0$  Hz, 2H), 7.43-7.38 (m, 3H), 7.31-7.23 (m, 5H), 7.09-7.03 (m, 2H), 4.66 (d,  $J = 5.2$  Hz, 2H), 2.36 (s, 3H);  $^{13}\text{C}$  NMR (100 MHz,  $\text{CDCl}_3$ )  $\delta$  155.4, 144.3, 142.4, 135.4, 135.2, 133.8, 132.0, 129.7, 129.0, 128.3, 127.9, 123.6, 122.2, 120.0, 94.5, 84.9, 67.9, 21.6; IR (film): 3203, 1573, 1460, 1440, 1366, 1344, 1306, 1276, 1165, 1115, 1004, 757, 578  $\text{cm}^{-1}$ ; HRMS-ESI (m/z) calcd. for  $\text{C}_{22}\text{H}_{20}\text{N}_3\text{O}_3\text{S}$   $[\text{M}+\text{H}]^+$  406.1225, found: 406.1226.

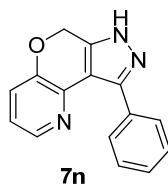

**9-Aza-1-phenyl-3,4-dihydrochromeno[3,4-c]pyrazole (7n)**

**6n** (405 mg, 1.0 mmol) was dissolved in CH<sub>2</sub>Cl<sub>2</sub> (10 mL), cooled with ice-water. A solution of BF<sub>3</sub>·Et<sub>2</sub>O (48%, 1 mL, 3.0 mmol) in CH<sub>2</sub>Cl<sub>2</sub> (5 mL) was added in dropwise. After the addition, the solution was stirred at r.t. for 12 h. The reaction was quenched with saturated NaHCO<sub>3</sub> (20 mL), and extracted with CH<sub>2</sub>Cl<sub>2</sub> for 3 times, washed with brine, dried over Na<sub>2</sub>SO<sub>4</sub>, concentrated in vacuum. The residue was purified by chromatography (PE:EA = 5:1), affording light yellow solid (212 mg, 85%); m.p. = 84-85 °C; <sup>1</sup>H NMR (400 MHz, CDCl<sub>3</sub>) δ 8.13 (d, *J* = 3.6 Hz, 1H), 7.97 (d, *J* = 6.8 Hz, 2H), 7.42-7.35 (m, 3H), 7.22-7.20 (m, 1H), 7.02-6.99 (m, 1H), 5.12 (s, 2H); <sup>13</sup>C NMR (100 MHz, CDCl<sub>3</sub>) δ 149.2, 148.1, 142.4, 140.6, 140.6 129.3, 128.9, 128.5, 128.4, 123.8, 122.2, 110.1, 64.2; IR (film): 3211, 3058, 2923, 1590, 1517, 1416, 1238, 1198, 1129, 1045, 840, 760 cm<sup>-1</sup>; HRMS-ESI (*m/z*) calcd. for C<sub>15</sub>H<sub>12</sub>N<sub>3</sub>O [M+H]<sup>+</sup> 250.0980, found: 250.0981.
