# Supplementary material for: A highly efficient BF3·Et2O-catalysed intramolecular [3+2] cycloaddition for the synthesis of 3,4-dihydrobenzopyrano[3,4-c]pyrazoles
Source: Royal Society of Chemistry journal article supplement (doi:10.1039/c2ra22025c), 2012-12-06
Supplement: c2ra22025c_2.pdf [file c2ra22025c_2.pdf]

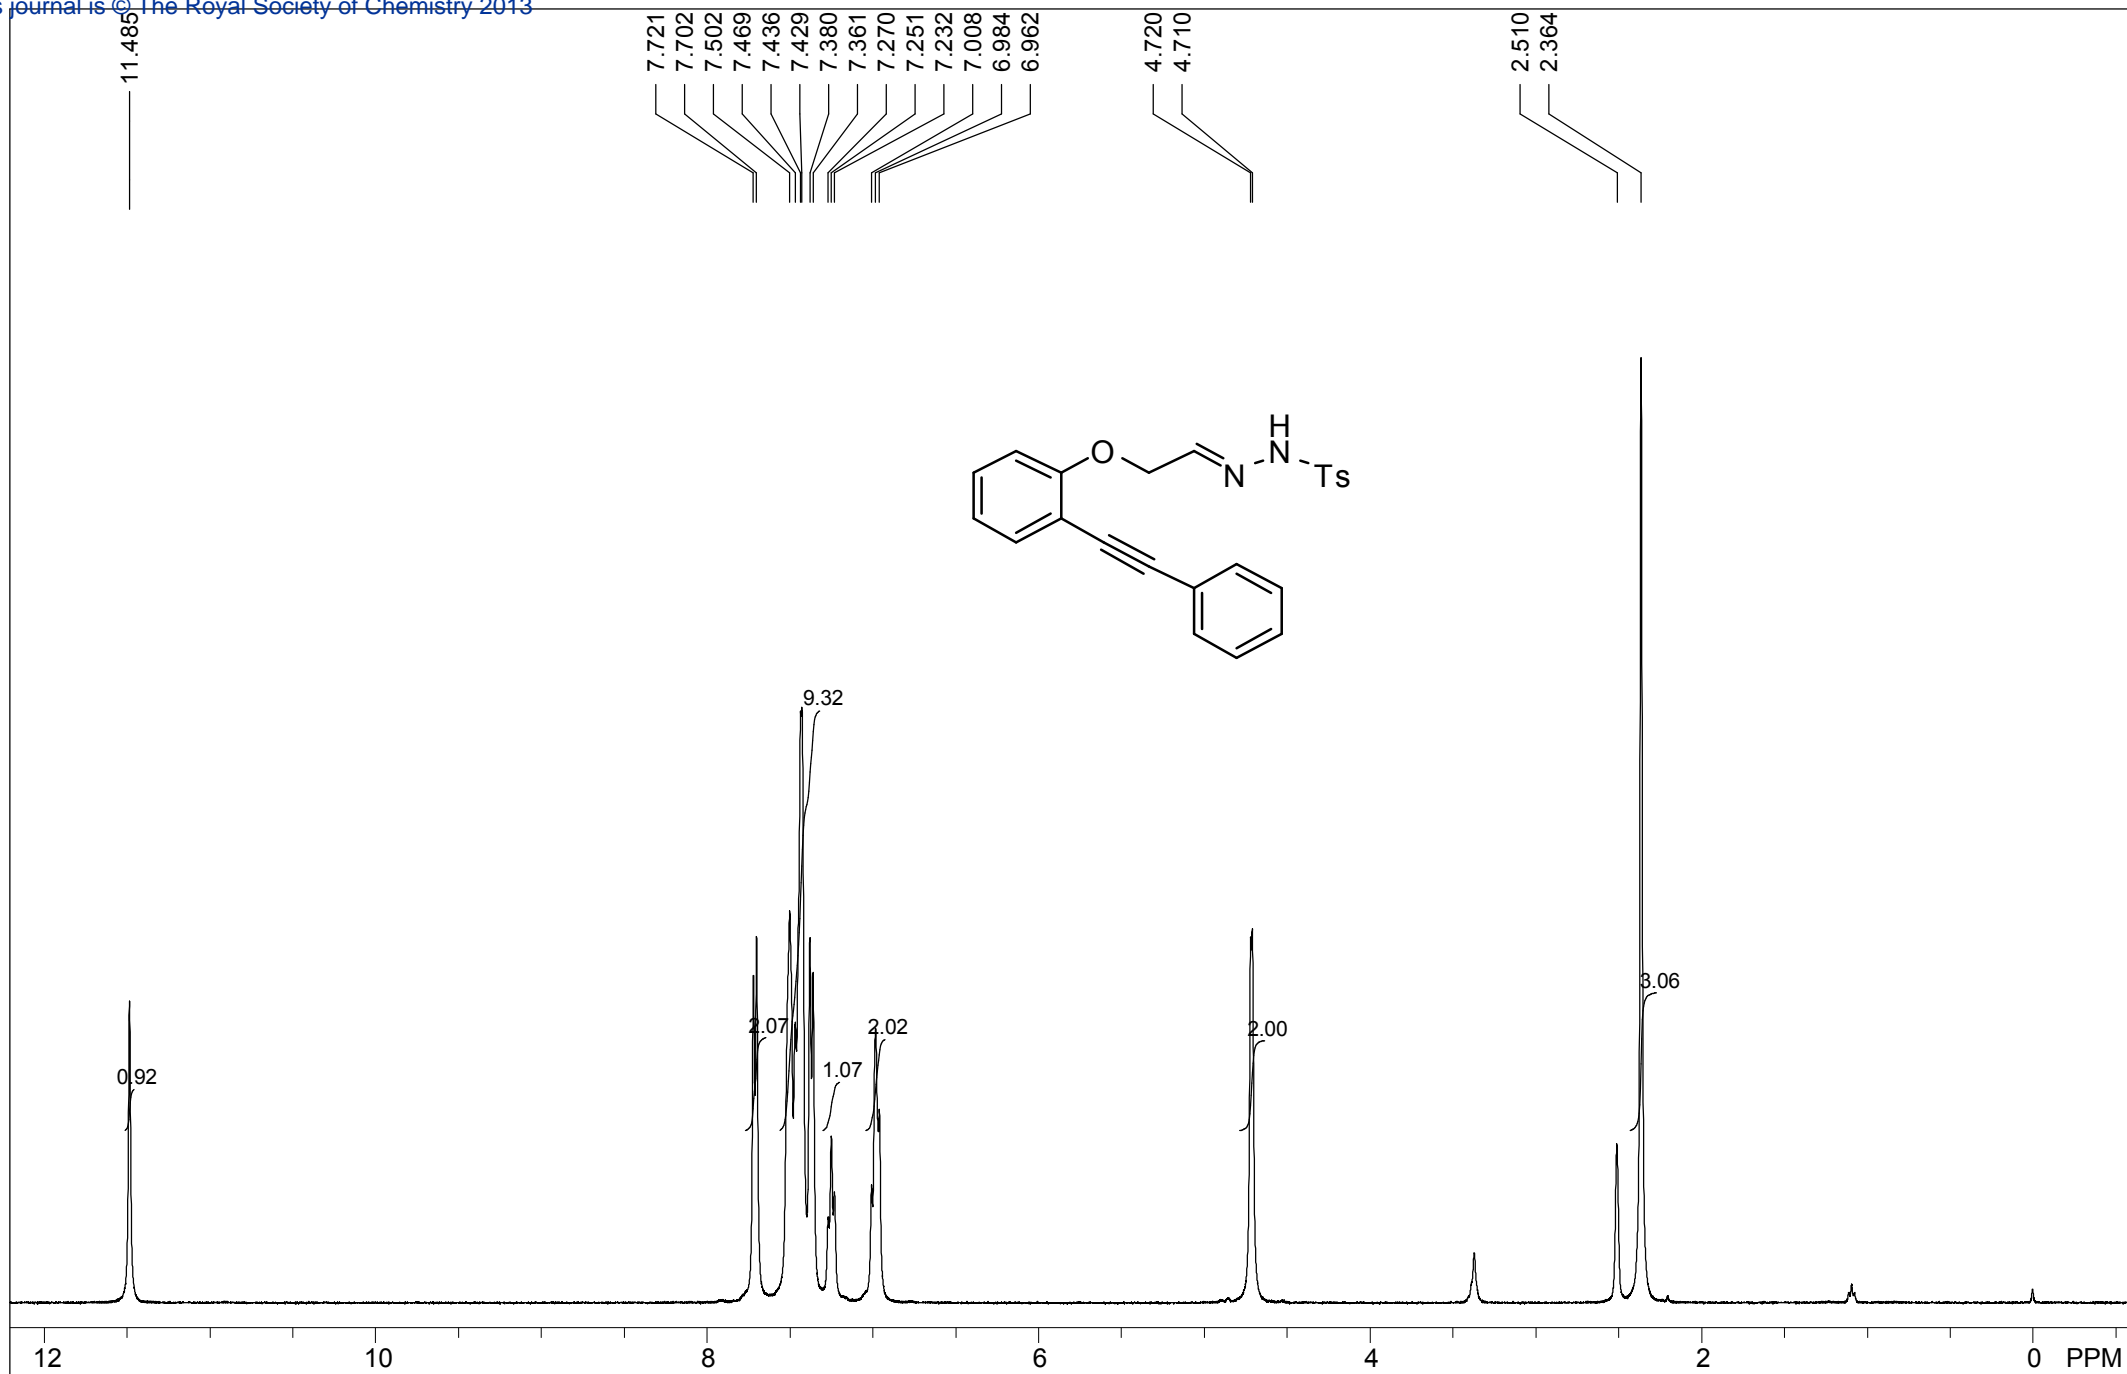

USER: Administr -- DATE: Sat Apr 30 11:40:18 2011

|             |             |             |             |                      |
|-------------|-------------|-------------|-------------|----------------------|
| F1: 400.132 | F2: 1.000   | SW1: 8224   | OF1: 2475.5 | PTS1d: 32768 , 32768 |
| EX: zg30    | PW: 13.6 us | PD: 1.0 sec | NA: 2       | LB: 0.0              |

Nuts - \$GWQ-2034\_1

158.152  
145.472  
143.423  
133.055  
136.015  
131.203  
130.123  
129.649  
128.694  
128.607  
127.097  
122.635  
121.075  
112.864  
111.771  
93.170  
85.813  
67.336  
40.139  
39.935  
39.723  
39.519  
39.308  
39.096  
38.892  
20.970

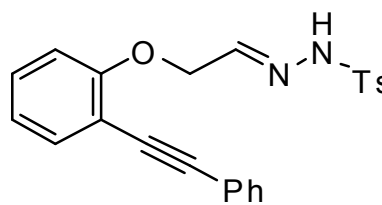

200 150 100 50 PPM

USER: Administr -- DATE: Sat Apr 30 11:59:14 2011

|             |           |            |             |              |         |                      |                       |
|-------------|-----------|------------|-------------|--------------|---------|----------------------|-----------------------|
| F1: 100.623 | F2: 1.000 | SW1: 24038 |             | OF1: 10011.3 |         | PTS1d: 32768 , 32768 |                       |
| EX: zgpg30  |           | PW: 9.5 us | PD: 2.0 sec | NA: 350      | LB: 0.0 |                      | Nuts - \$GWQ-2034-C_1 |

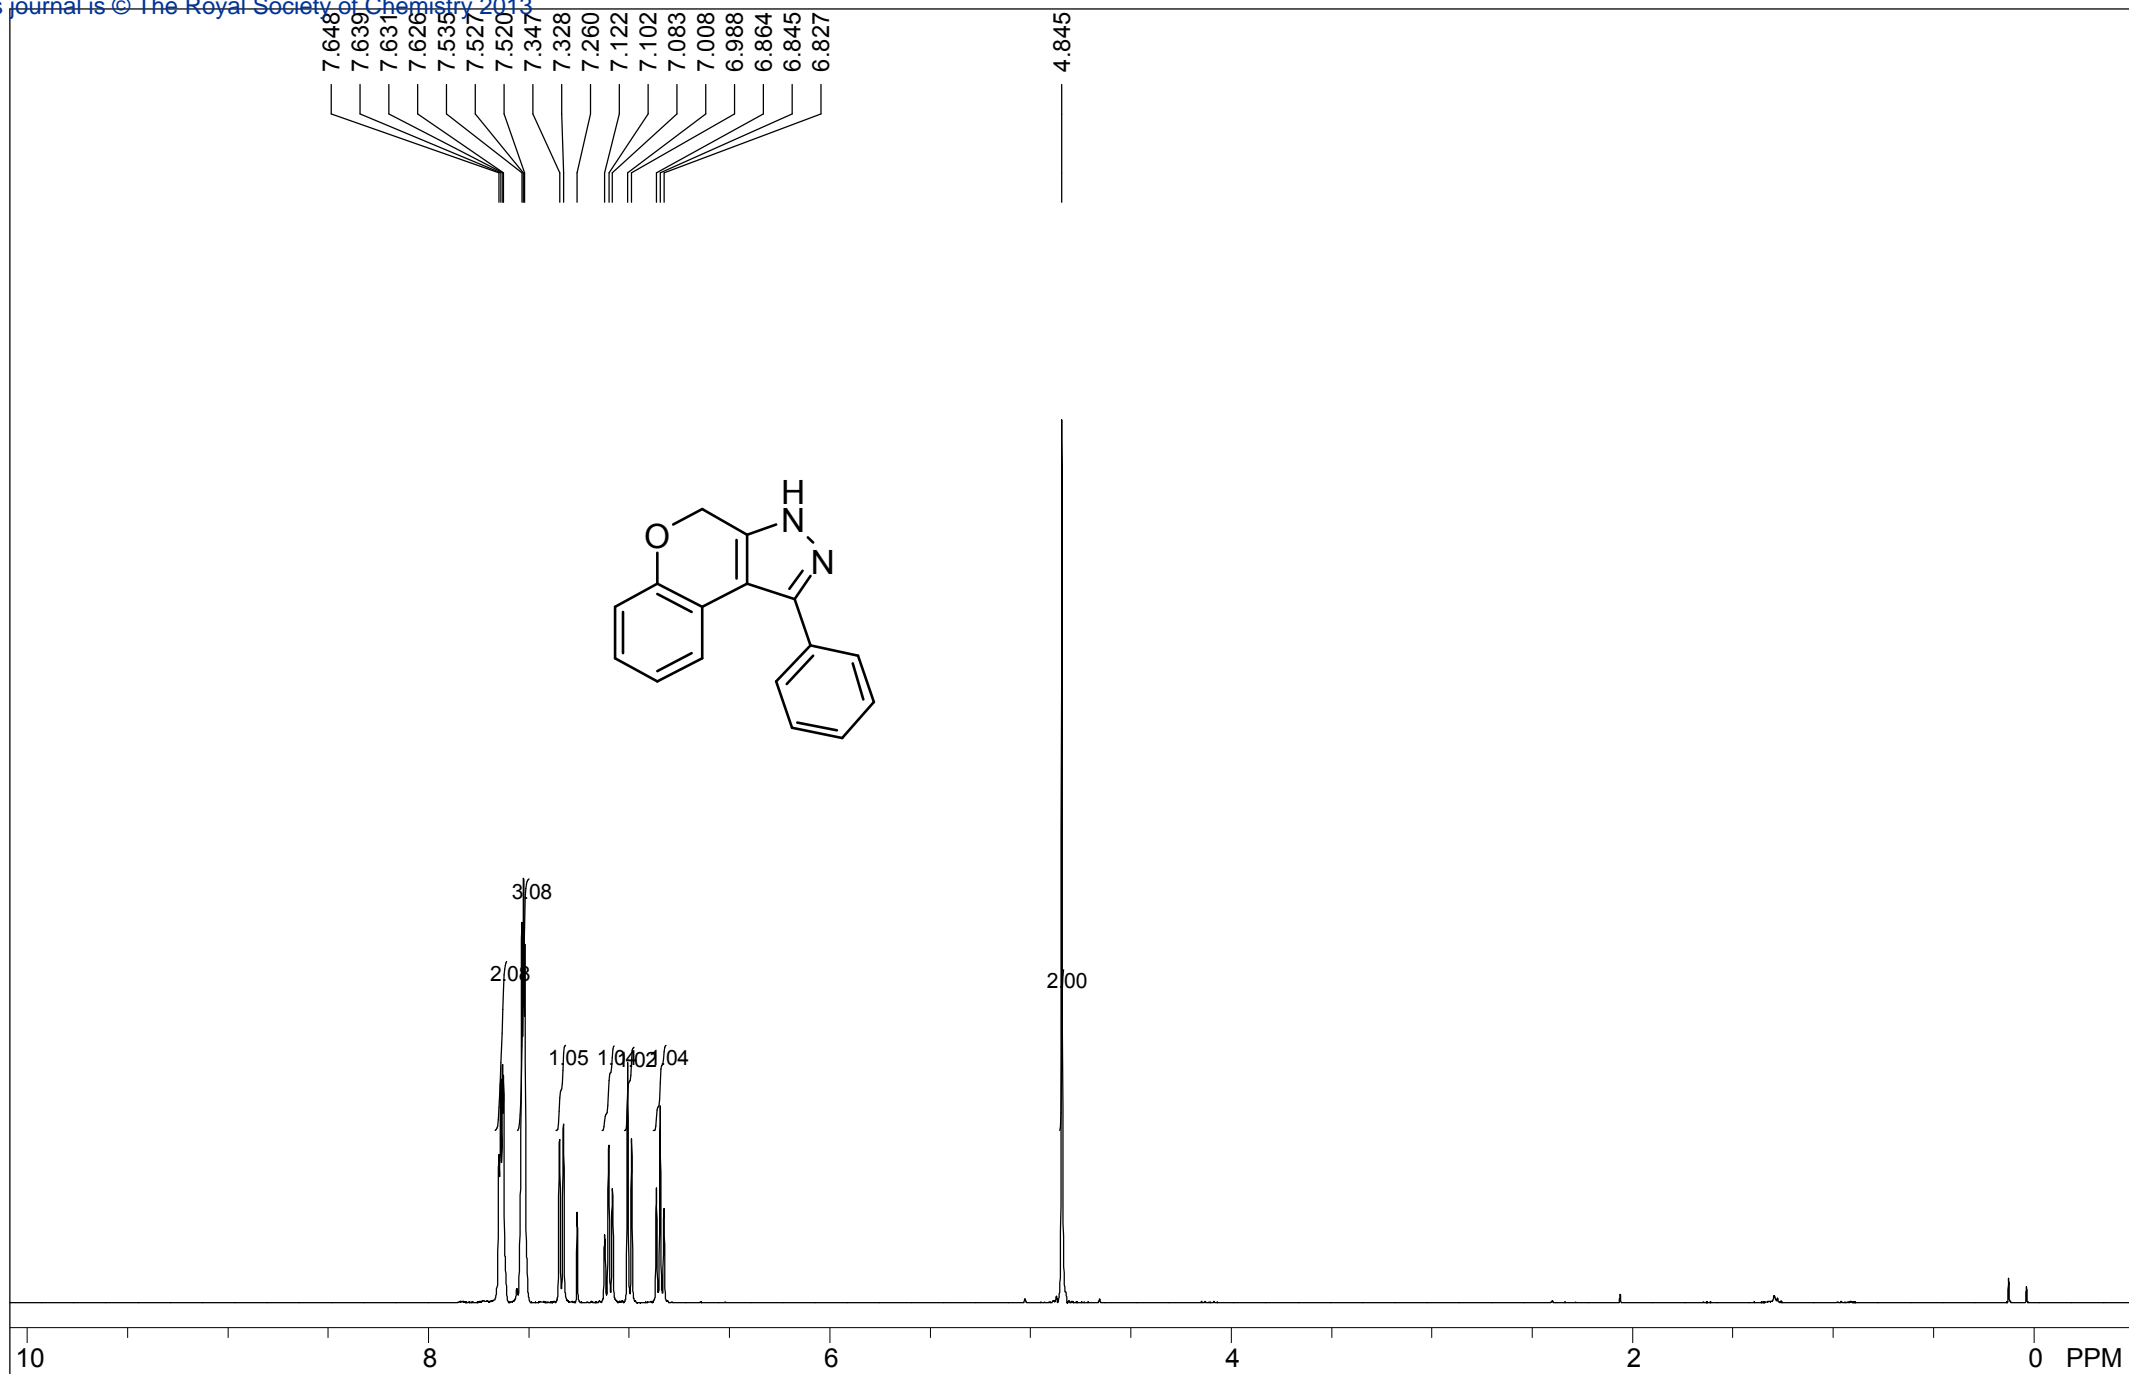

10 8 6 4 2 0 PPM

USER: Administr -- DATE: Wed Apr 27 22:40:46 2011

|             |           |             |             |             |         |                      |
|-------------|-----------|-------------|-------------|-------------|---------|----------------------|
| F1: 400.132 | F2: 1.000 | SW1: 8224   |             | OF1: 2462.6 |         | PTS1d: 32768 , 32768 |
| EX: zg30    |           | PW: 13.6 us | PD: 1.0 sec | NA: 2       | LB: 0.0 | Nuts - \$GWQ-2035_3  |

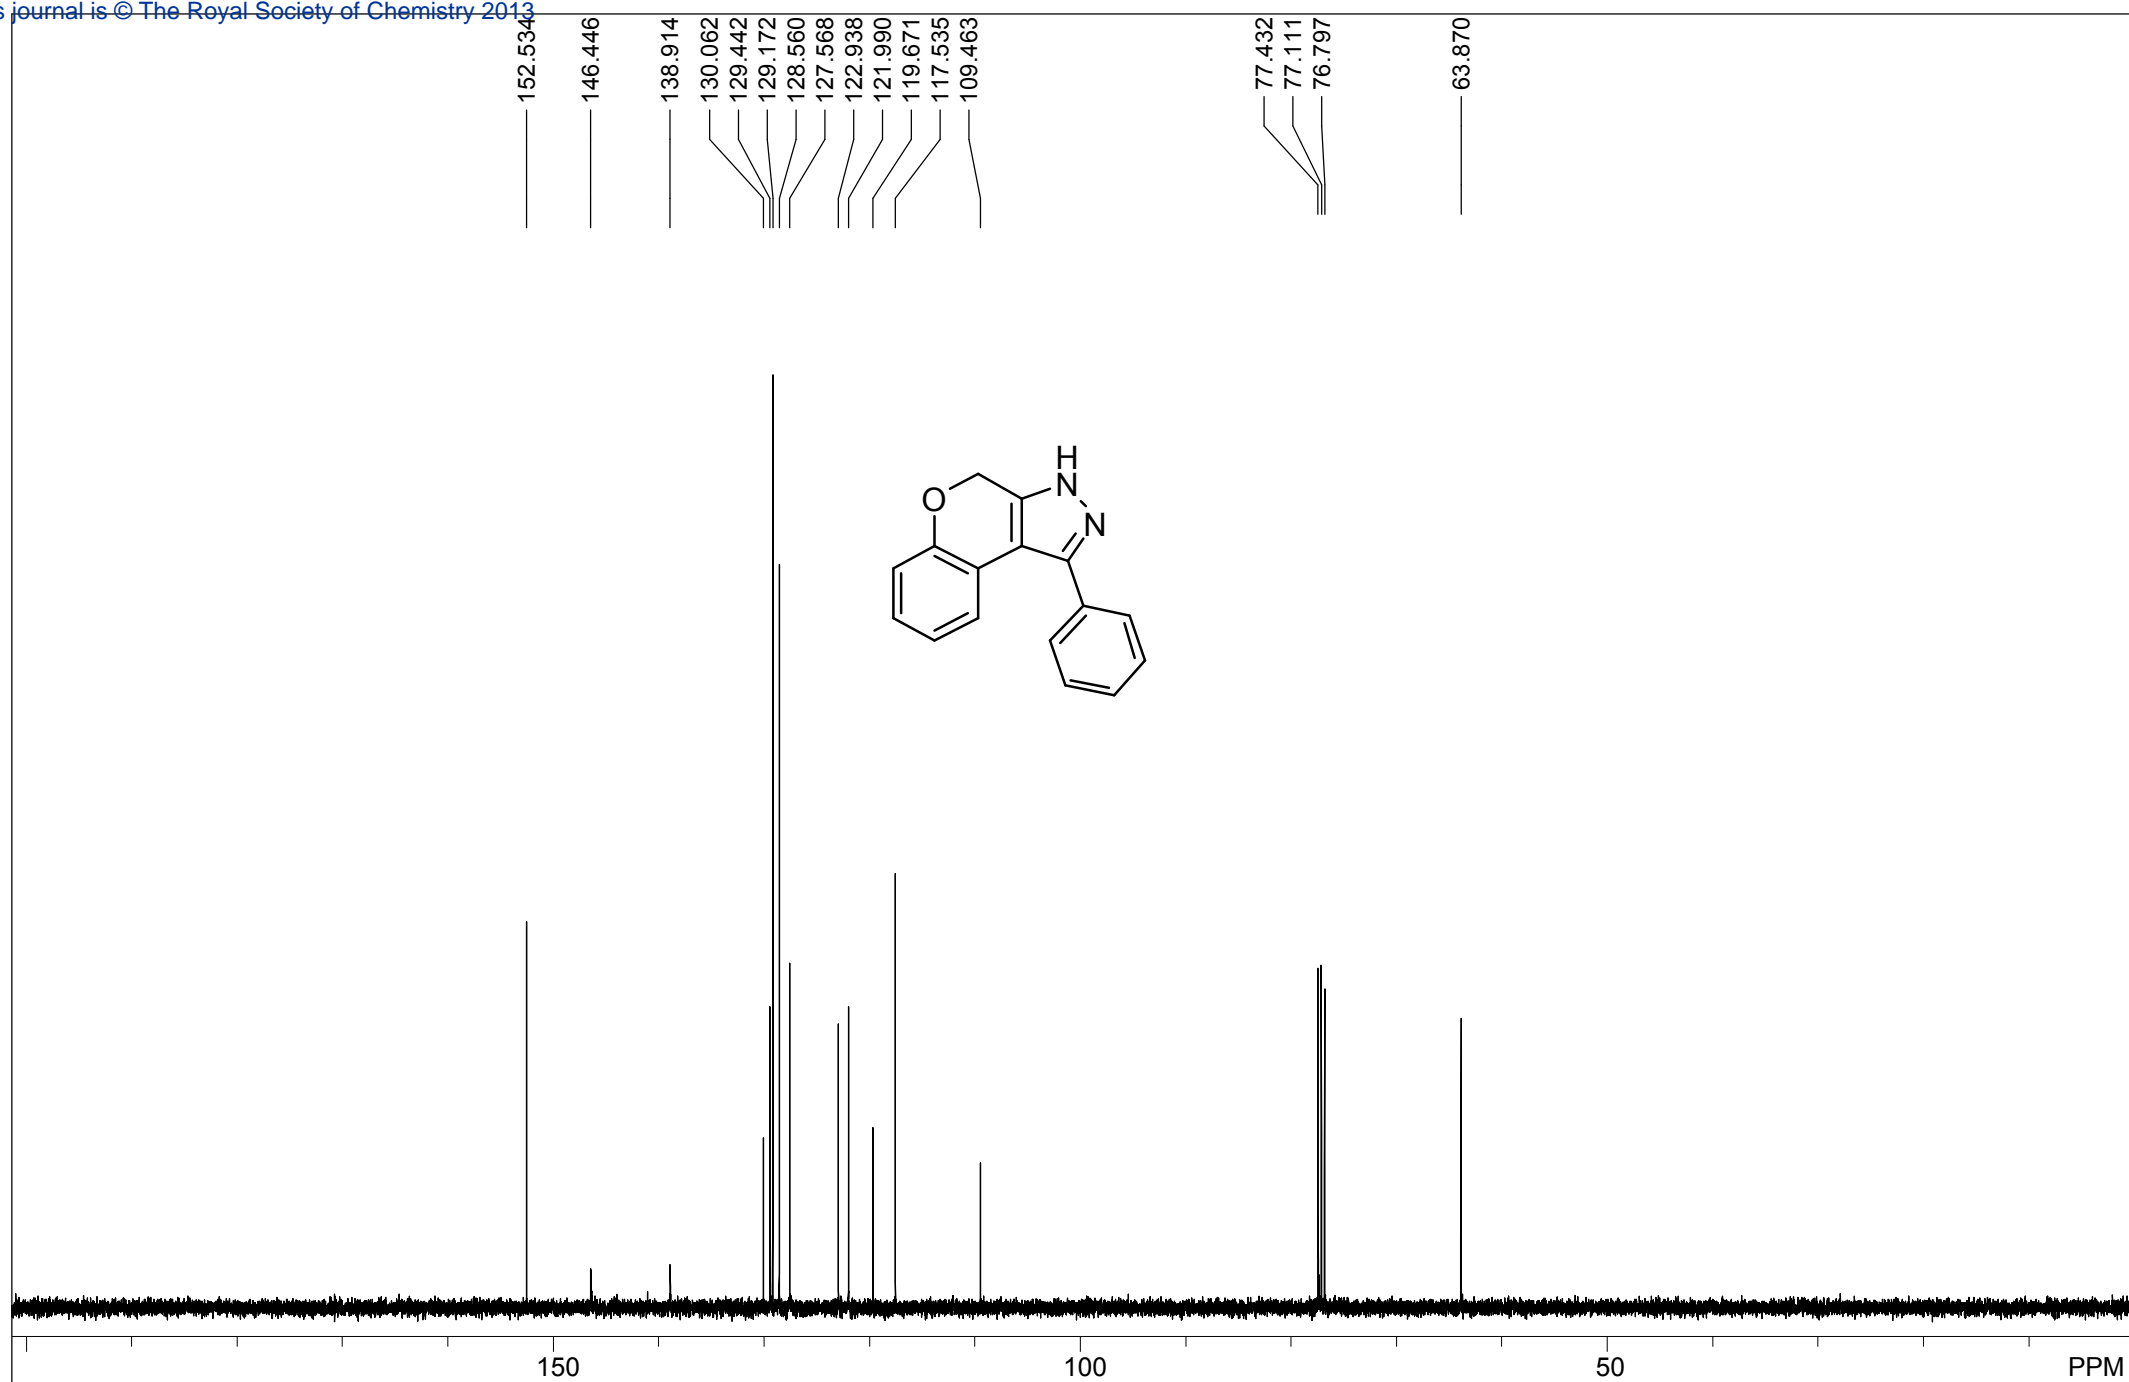

|                                                   |           |            |             |              |         |                      |
|---------------------------------------------------|-----------|------------|-------------|--------------|---------|----------------------|
| USER: Administr -- DATE: Wed Apr 27 23:10:44 2011 |           |            |             |              |         |                      |
| F1: 100.623                                       | F2: 1.000 | SW1: 24038 |             | OF1: 10063.0 |         | PTS1d: 32768 , 32768 |
| EX: zgpg30                                        |           | PW: 9.5 us | PD: 2.0 sec | NA: 100      | LB: 0.0 | Nuts - \$GWQ-2035_4  |

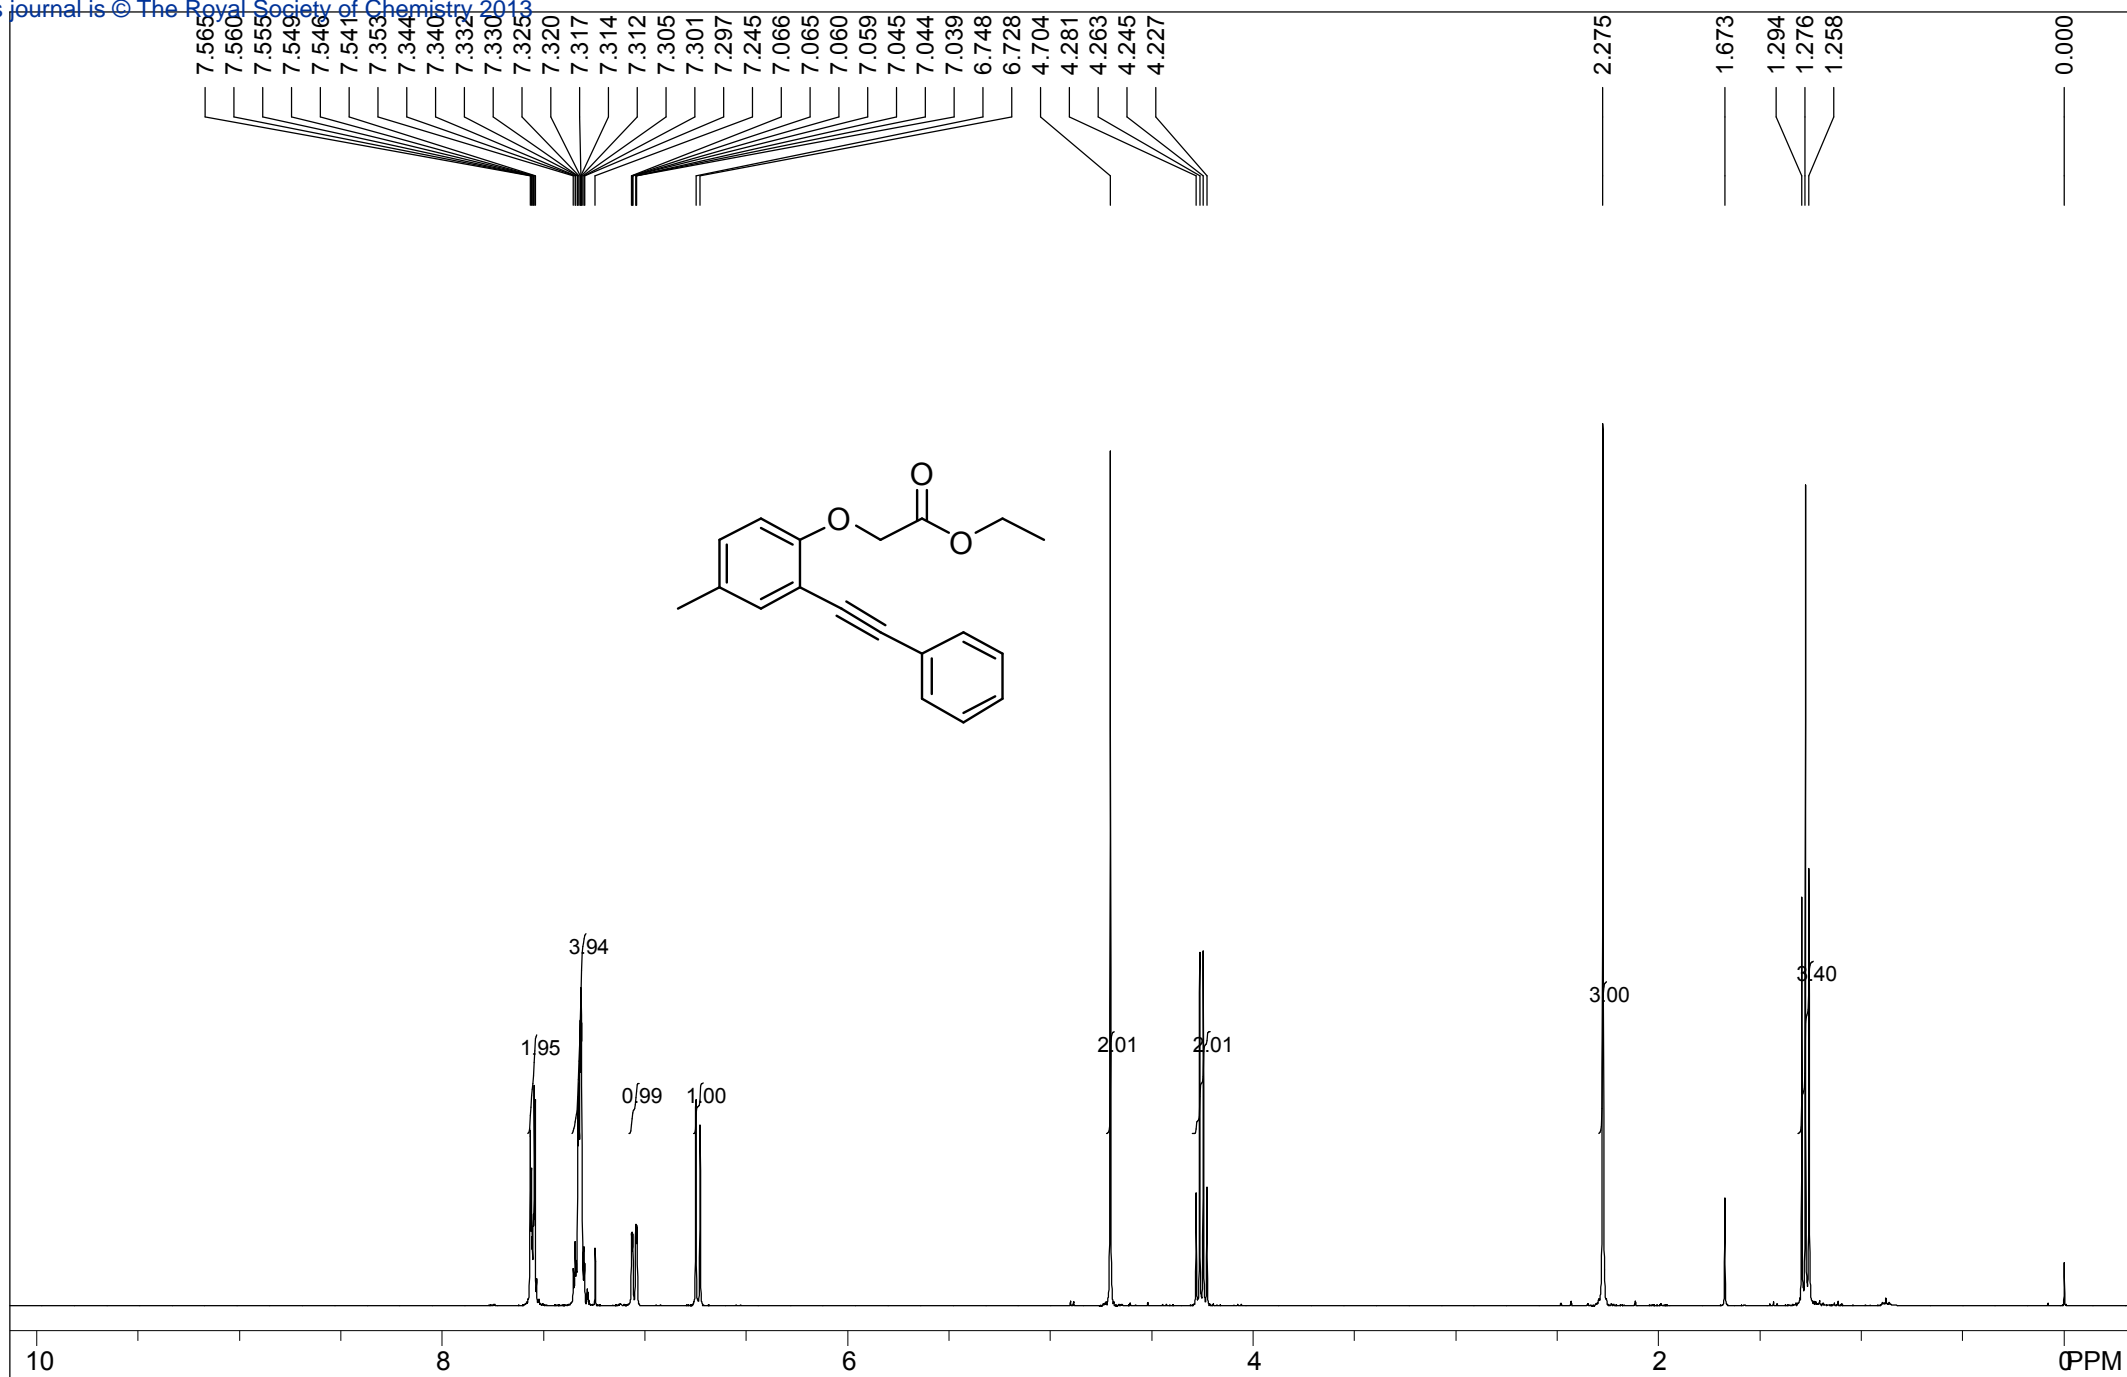

10 8 6 4 2 0 PPM

USER: Administr -- DATE: Thu May 19 22:48:31 2011

|             |             |             |             |                      |
|-------------|-------------|-------------|-------------|----------------------|
| F1: 400.132 | F2: 1.000   | SW1: 8224   | OF1: 2456.7 | PTS1d: 32768 , 32768 |
| EX: zg30    | PW: 13.6 us | PD: 1.0 sec | NA: 2       | LB: 0.0              |

Nuts - \$GWQ-2046\_4

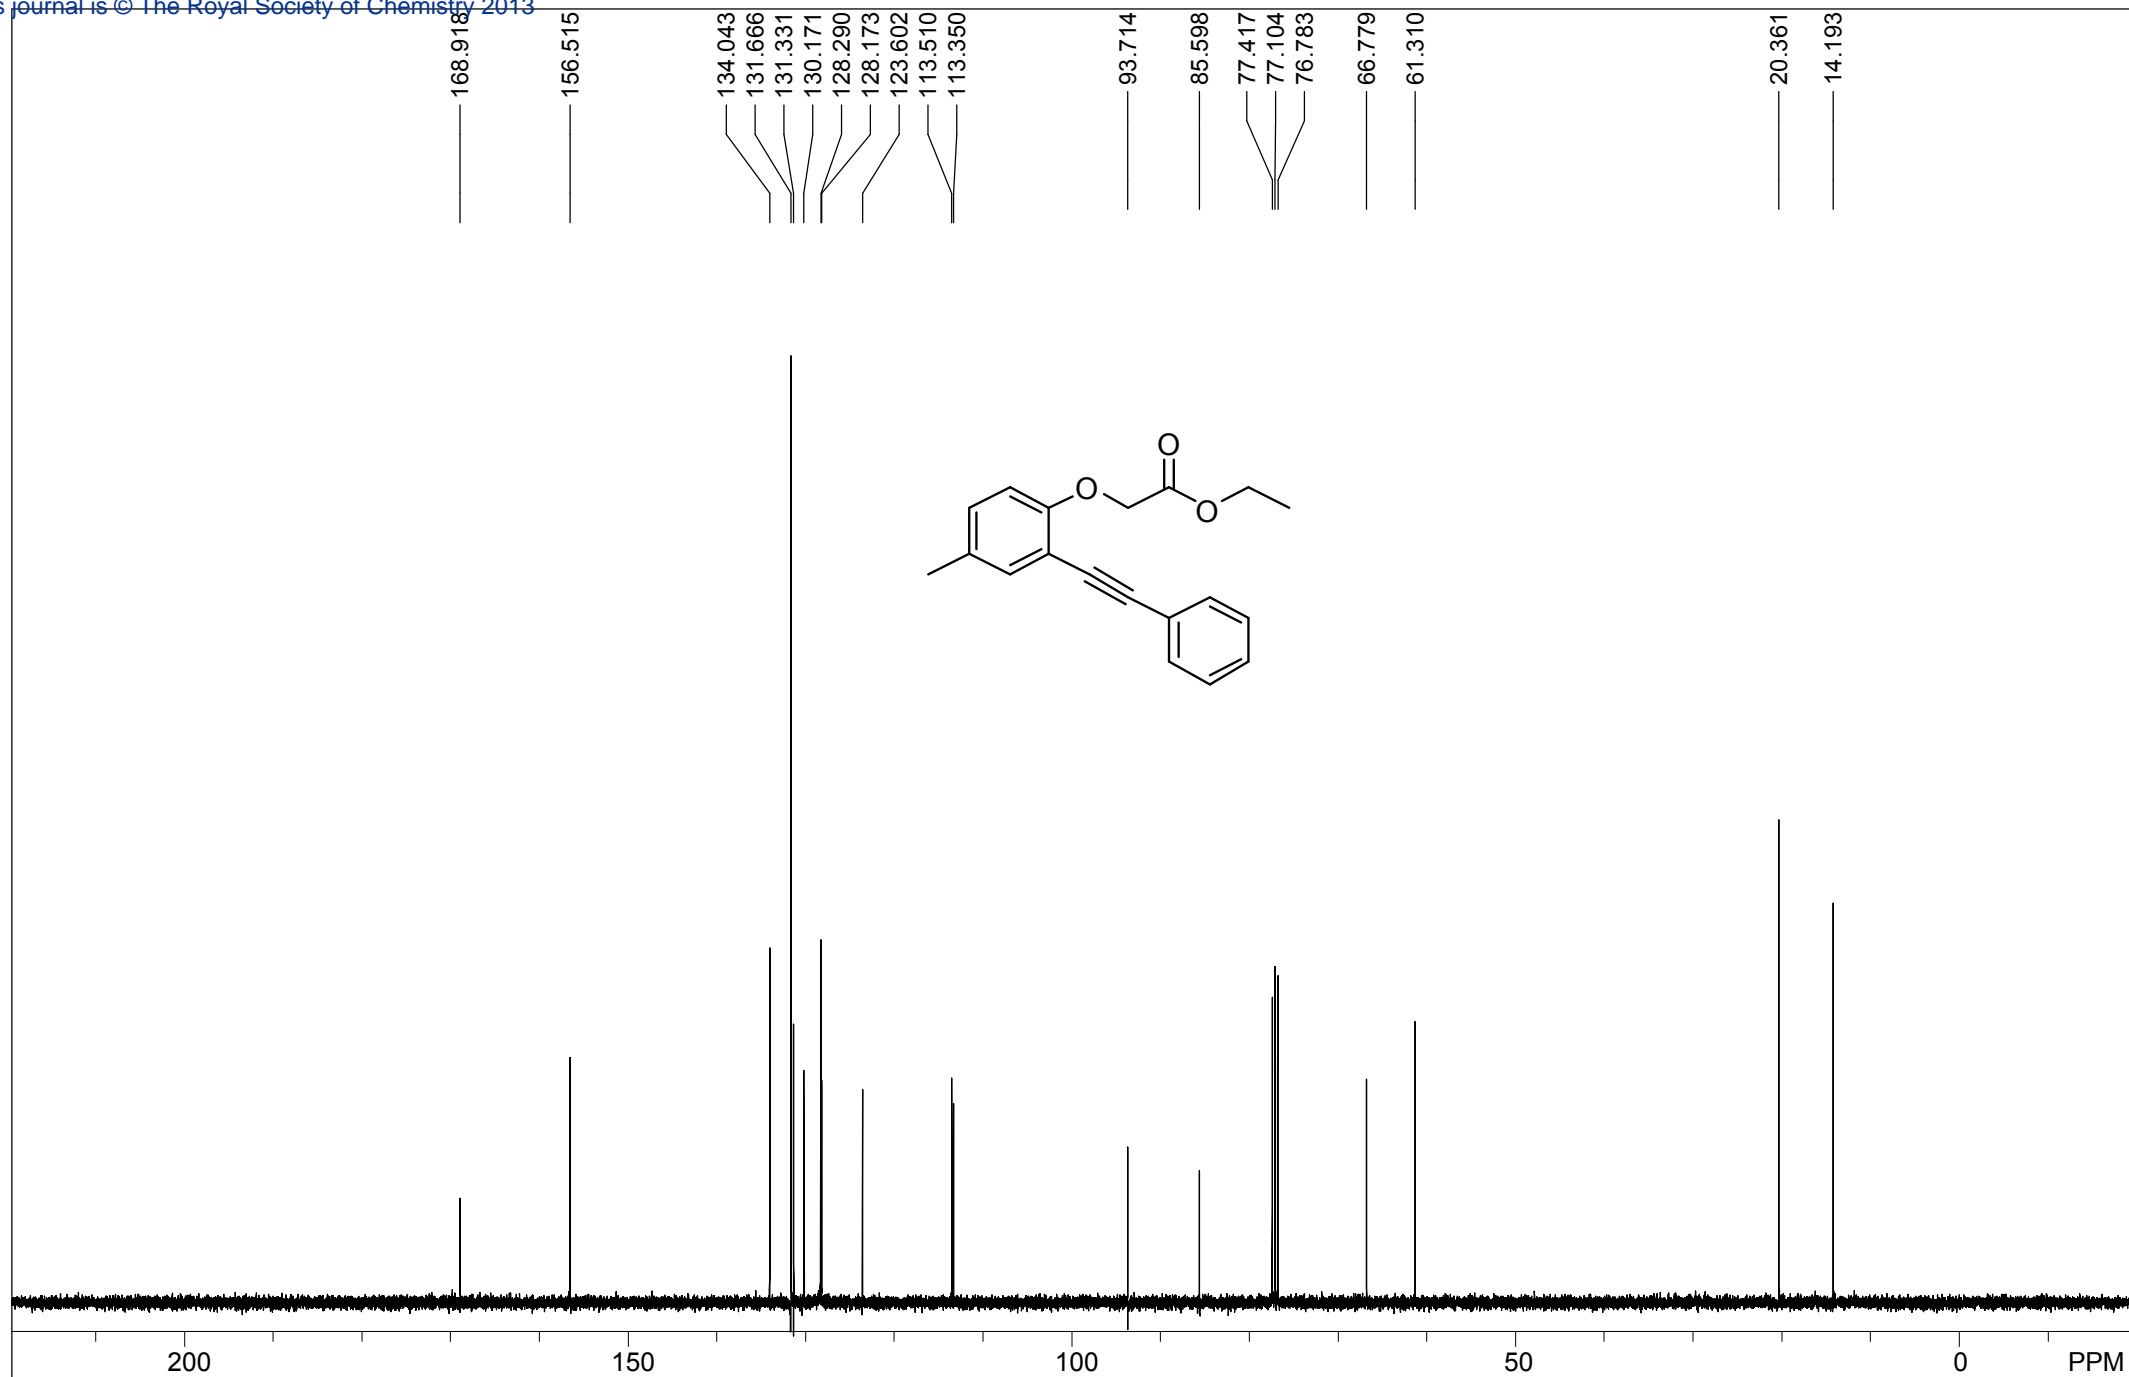

USER: Administr -- DATE: Thu May 19 22:57:28 2011

|             |           |            |             |              |         |                      |
|-------------|-----------|------------|-------------|--------------|---------|----------------------|
| F1: 100.623 | F2: 1.000 | SW1: 24038 |             | OF1: 10063.0 |         | PTS1d: 32768 , 32768 |
| EX: zgpg30  |           | PW: 9.5 us | PD: 2.0 sec | NA: 131      | LB: 0.0 | Nuts - \$GWQ-2046_5  |

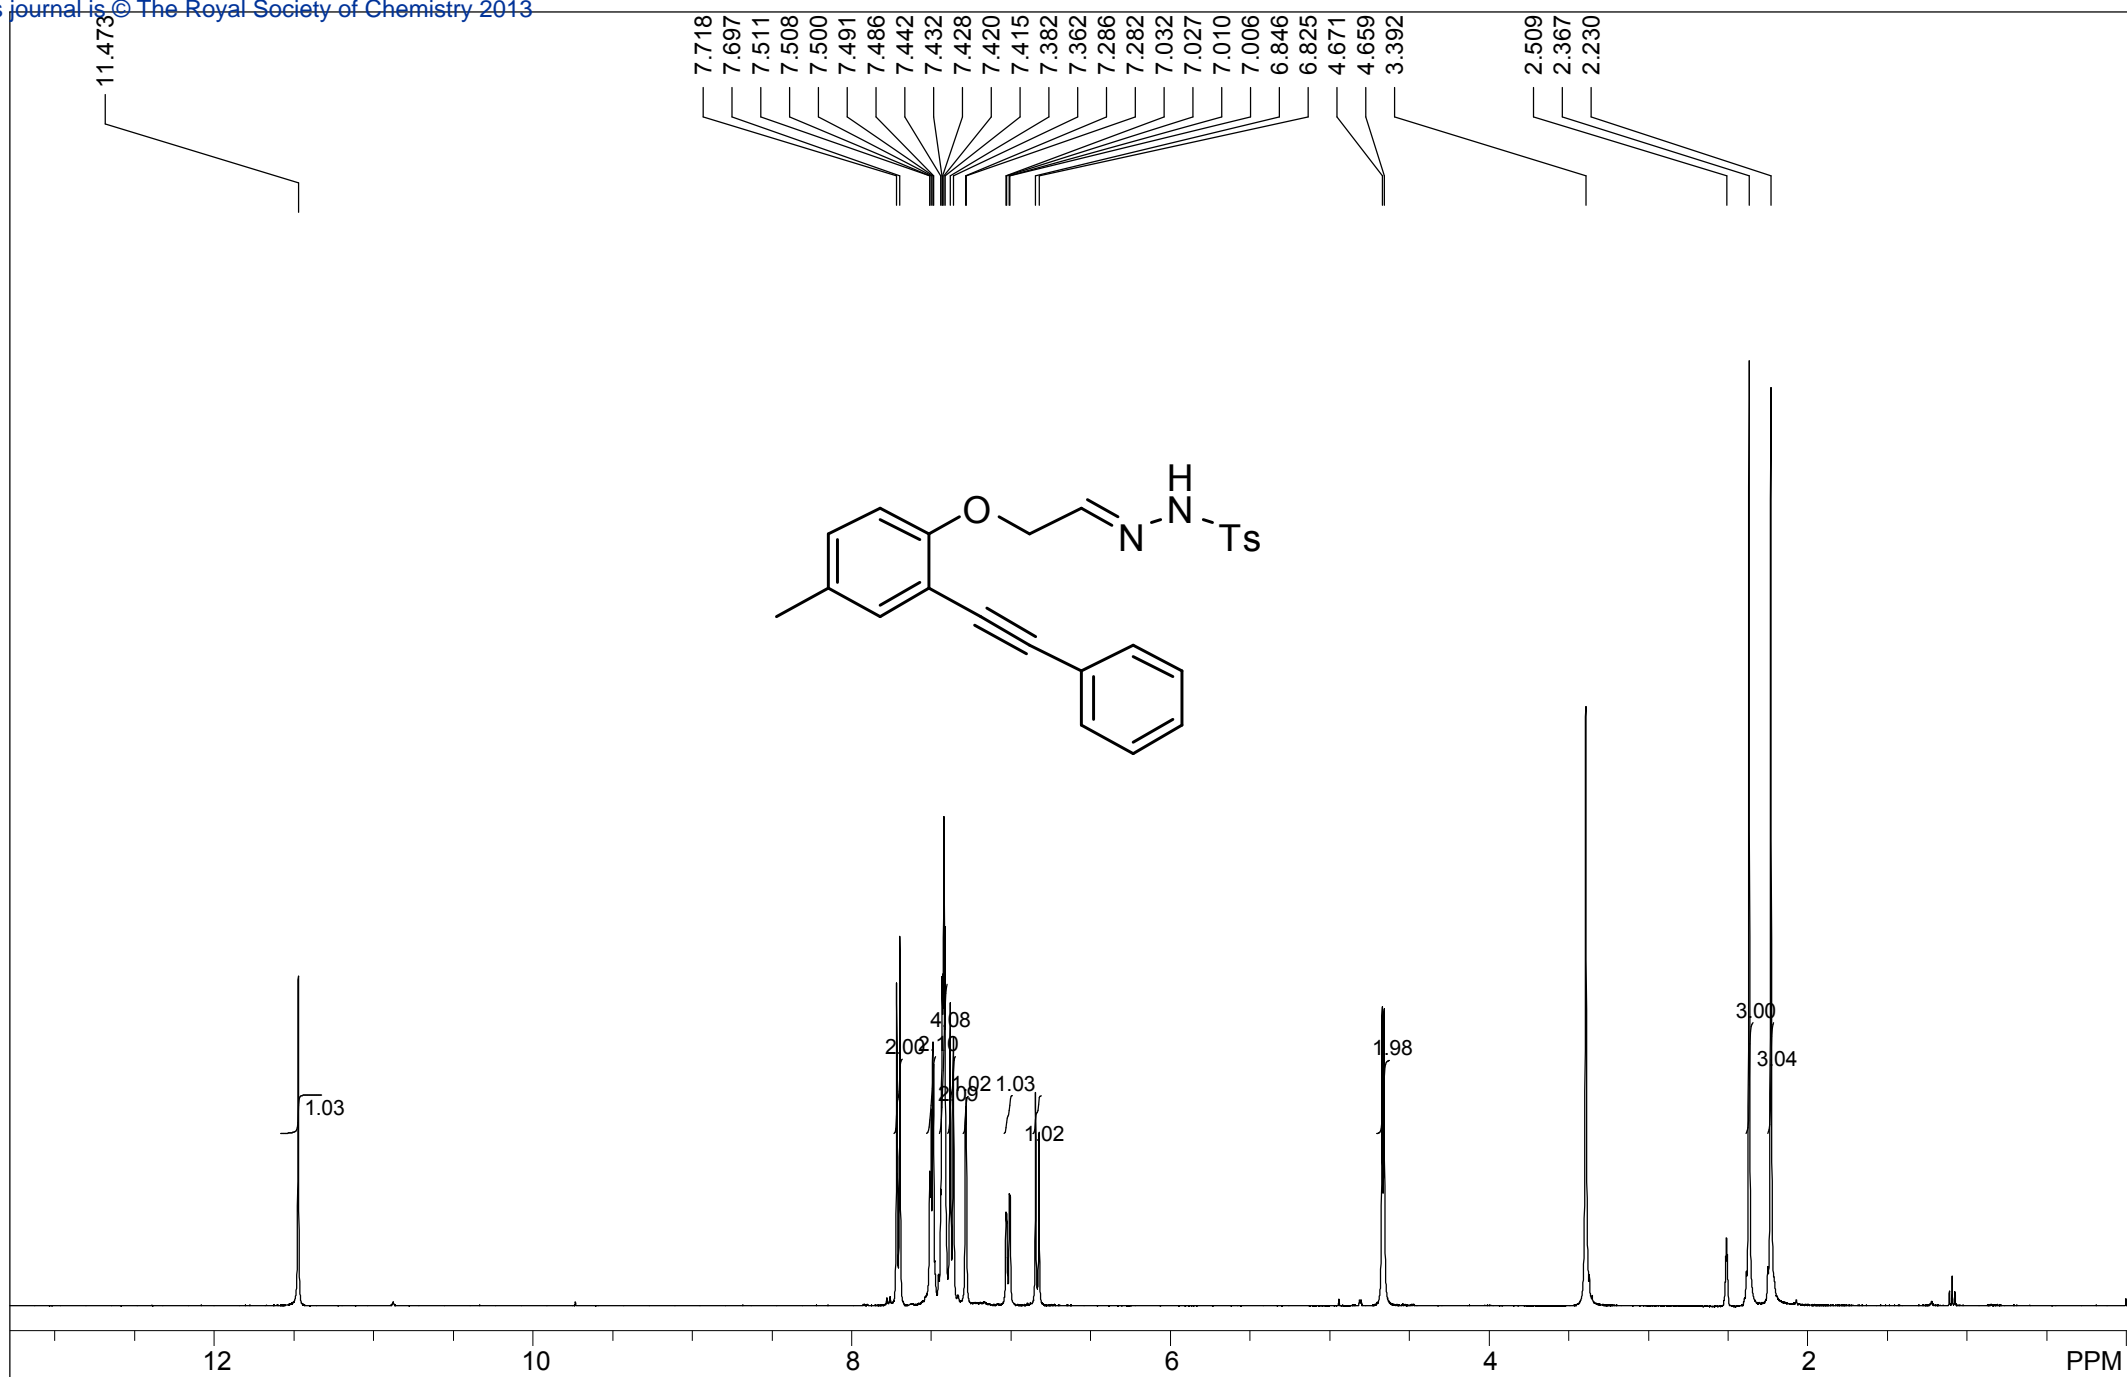

USER: Administr -- DATE: Sun May 29 09:39:15 2011

|             |           |             |             |             |         |                      |                     |
|-------------|-----------|-------------|-------------|-------------|---------|----------------------|---------------------|
| F1: 400.132 | F2: 1.000 | SW1: 8224   |             | OF1: 2471.1 |         | PTS1d: 32768 , 32768 |                     |
| EX: zg30    |           | PW: 13.6 us | PD: 1.0 sec | NA: 2       | LB: 0.0 |                      | Nuts - \$GWQ-2053_6 |

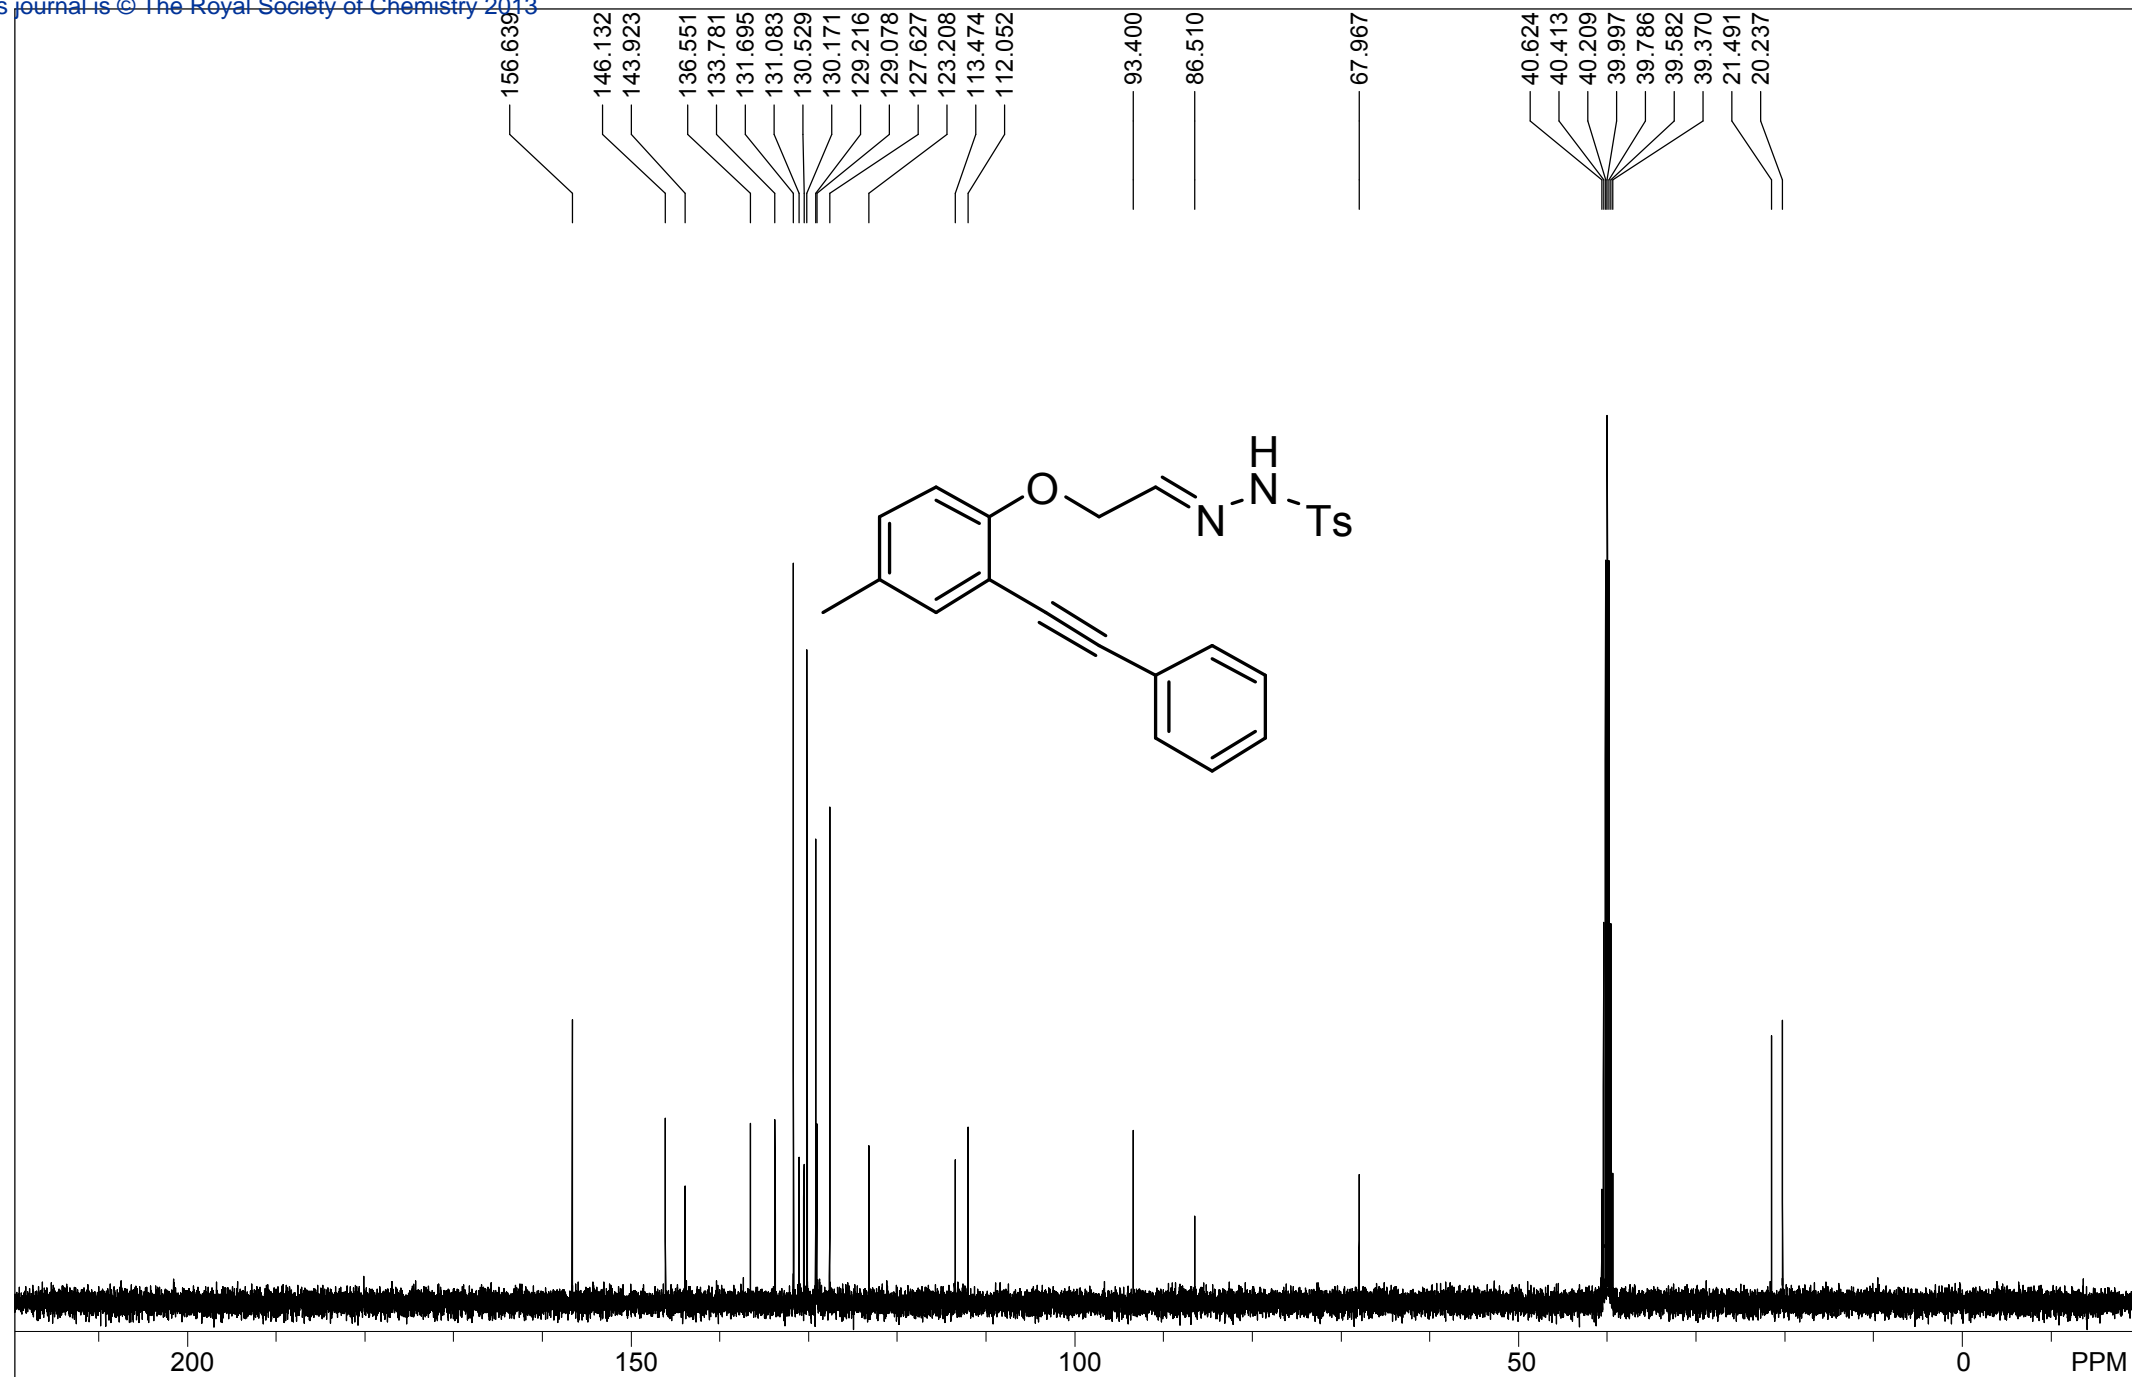

|             |  |            |  |             |  |              |  |                                                   |  |
|-------------|--|------------|--|-------------|--|--------------|--|---------------------------------------------------|--|
| F1: 100.623 |  | F2: 1.000  |  | SW1: 24038  |  | OF1: 10063.0 |  | USER: Administr -- DATE: Sun May 29 09:45:18 2011 |  |
| EX: zgpg30  |  | PW: 9.5 us |  | PD: 2.0 sec |  | NA: 90       |  | PTS1d: 32768 , 32768                              |  |
|             |  |            |  |             |  |              |  | Nuts - \$GWQ-2053_7                               |  |



7.630  
7.624  
7.610  
7.606  
7.521  
7.504  
7.258  
7.157  
6.907

5.122

2.165

0.000

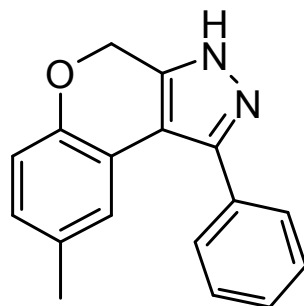

2/99  
2/00  
0/96  
1/94

2/01

3/00

8

6

4

2

PPM

USER: Administr -- DATE: Tue May 24 11:56:28 2011

F1: 400.132

F2: 1.000

SW1: 8224

OF1: 2461.9

PTS1d: 32768 , 32768

EX: zg30

PW: 13.6 us

PD: 1.0 sec

NA: 2

LB: 0.0

Nuts - \$GWQ-2048\_4

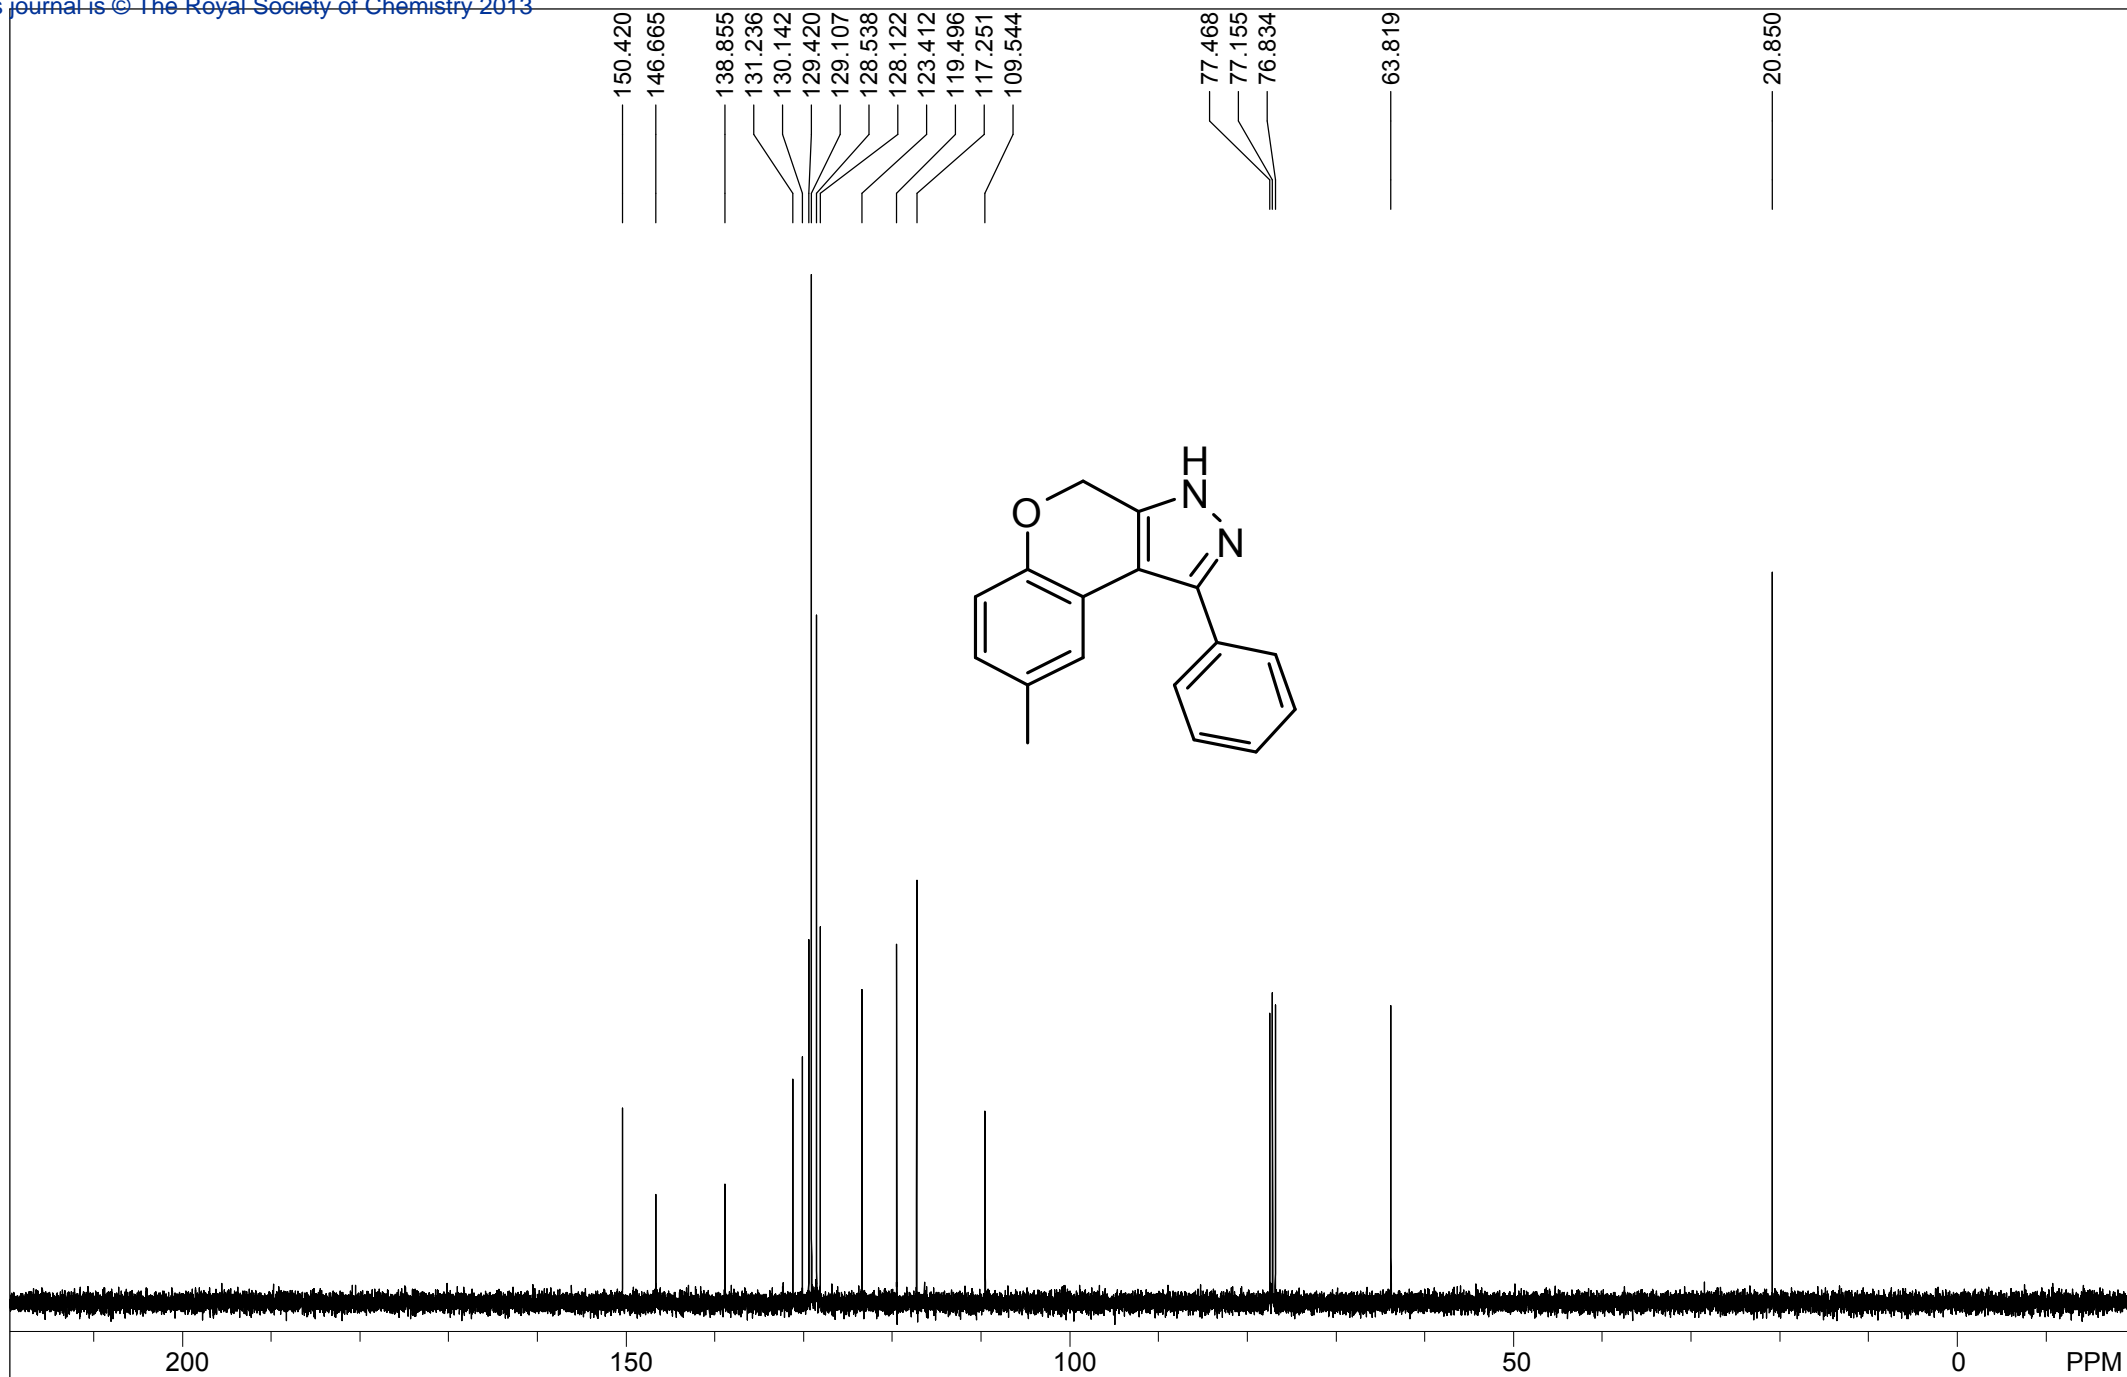

USER: Administr -- DATE: Sun May 29 10:07:50 2011

|             |           |            |             |              |         |                      |
|-------------|-----------|------------|-------------|--------------|---------|----------------------|
| F1: 100.623 | F2: 1.000 | SW1: 24038 |             | OF1: 10063.0 |         | PTS1d: 32768 , 32768 |
| EX: zgpg30  |           | PW: 9.5 us | PD: 2.0 sec | NA: 50       | LB: 0.0 | Nuts - \$GWQ-2048_8  |

7.586  
7.569  
7.527  
7.342  
7.326  
7.290  
7.268  
6.776  
6.755

4.725  
4.296  
4.278  
4.260  
4.242

1.305  
1.292  
1.274

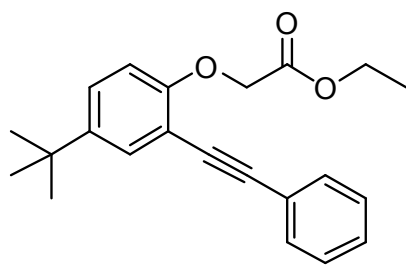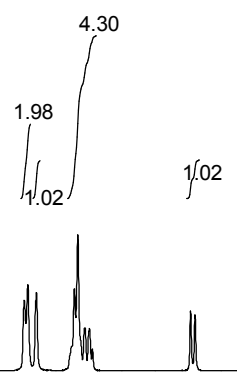

1/02

2/00

2/04

12/21

10 8 6 4 2 PPM

USER: Administr -- DATE: Thu Jan 06 23:40:20 2011

|             |           |             |             |             |         |                      |
|-------------|-----------|-------------|-------------|-------------|---------|----------------------|
| F1: 400.132 | F2: 1.000 | SW1: 8224   |             | OF1: 2460.9 |         | PTS1d: 32768 , 32768 |
| EX: zg30    |           | PW: 13.6 us | PD: 1.0 sec | NA: 2       | LB: 0.0 | Nuts - \$GWQ-2001_1  |

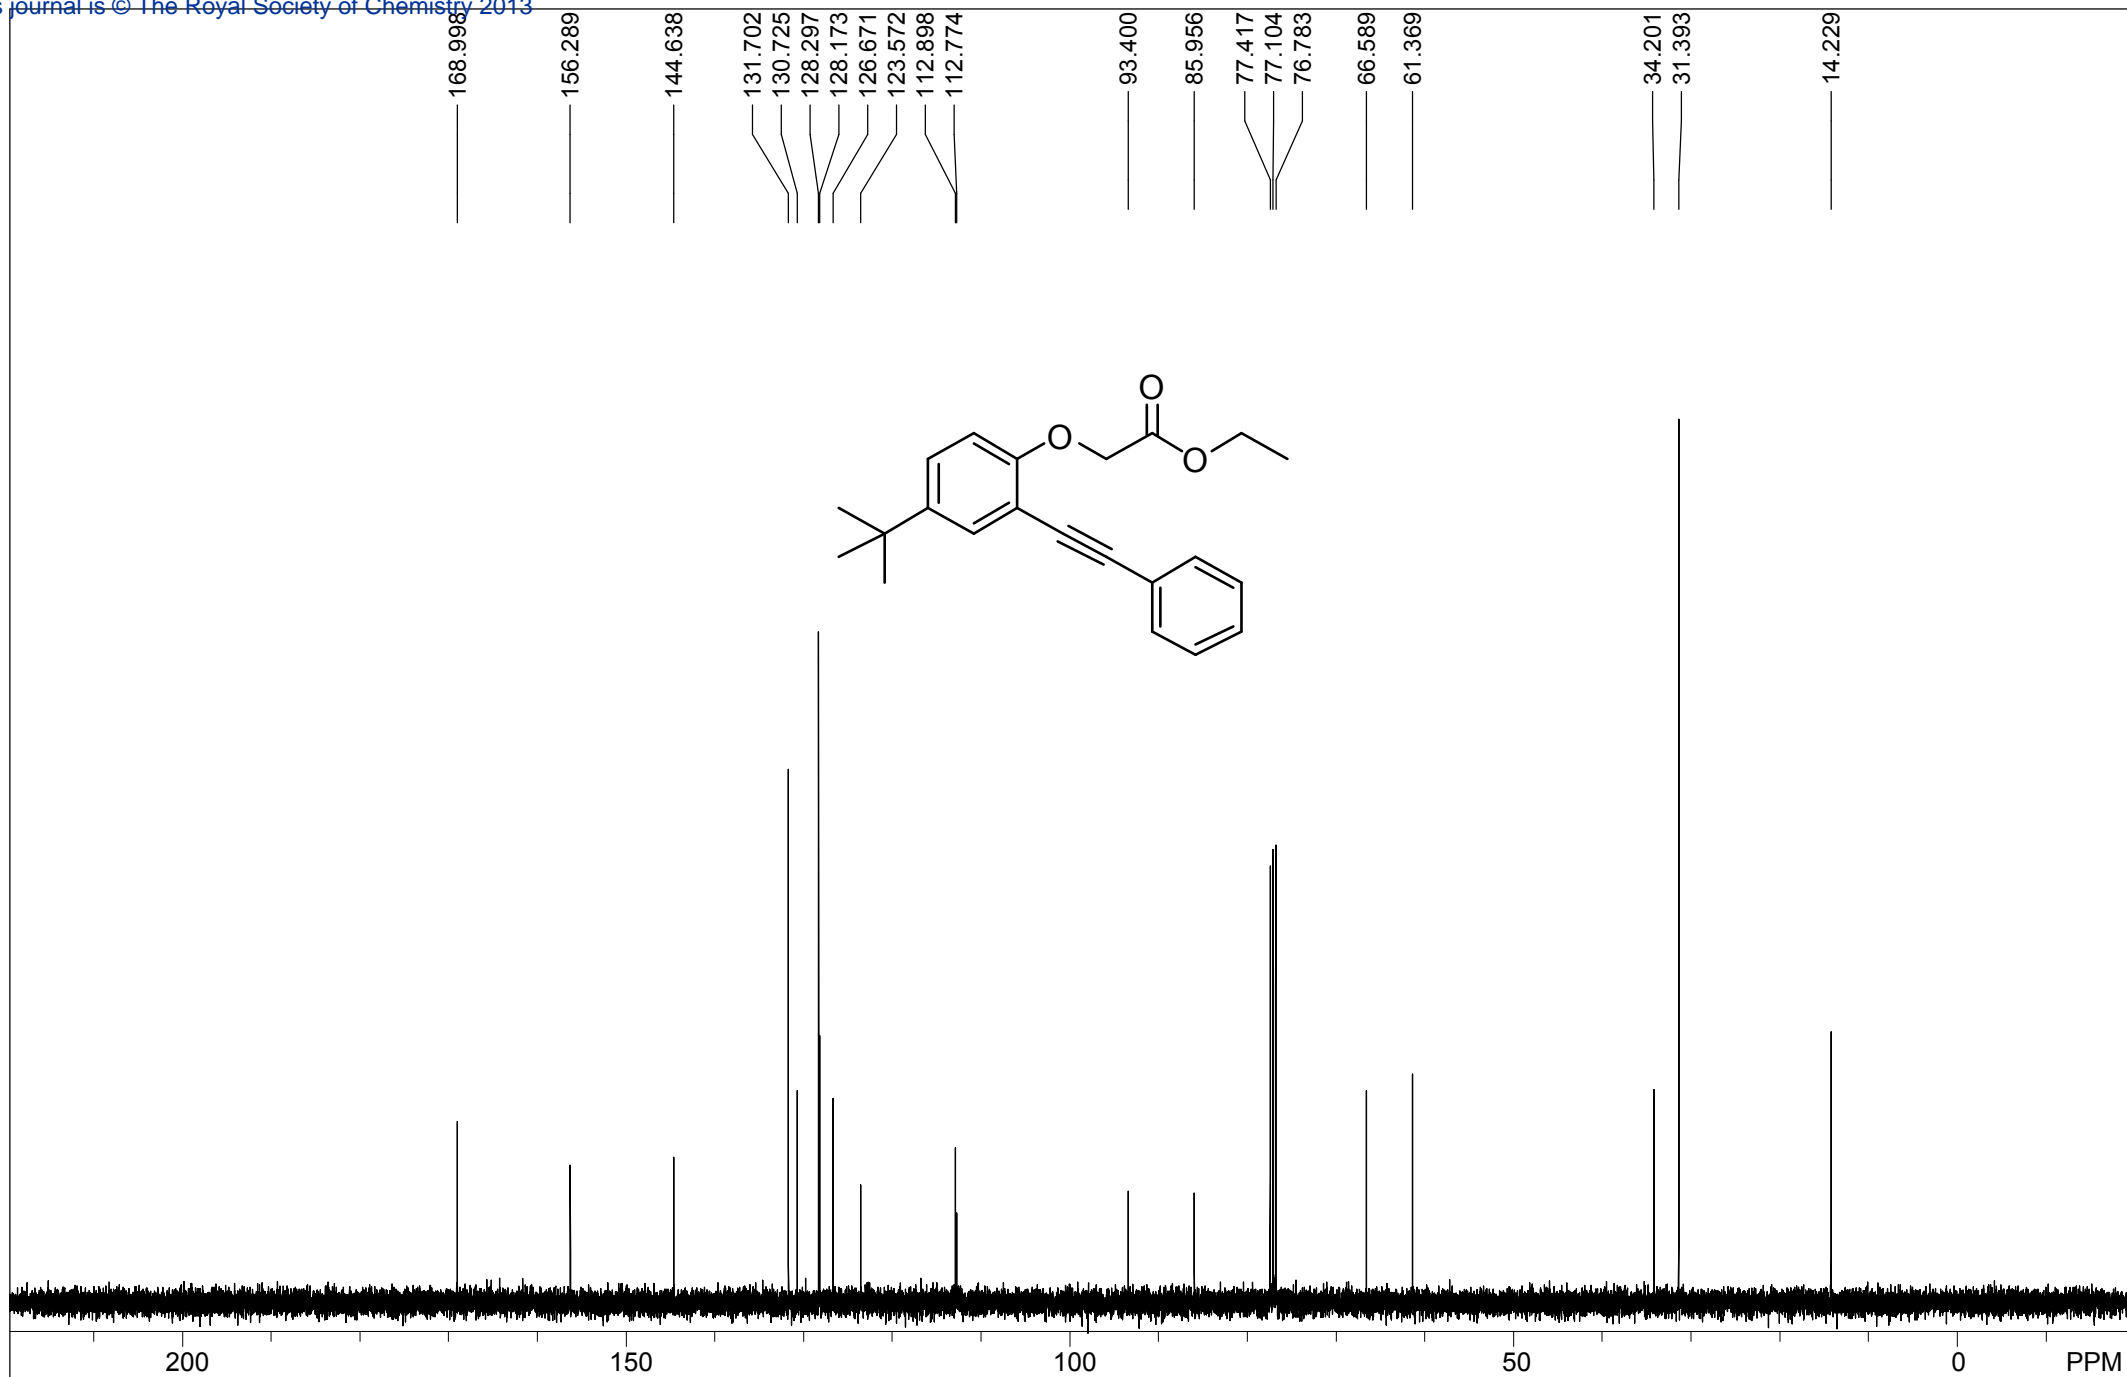

|                                                   |           |            |             |              |         |                      |
|---------------------------------------------------|-----------|------------|-------------|--------------|---------|----------------------|
| USER: Administr -- DATE: Tue Jan 11 21:36:52 2011 |           |            |             |              |         |                      |
| F1: 100.623                                       | F2: 1.000 | SW1: 24038 |             | OF1: 10063.0 |         | PTS1d: 32768 , 32768 |
| EX: zgpg30                                        |           | PW: 9.5 us | PD: 2.0 sec | NA: 56       | LB: 0.0 | Nuts - \$GWQ-2001_2  |

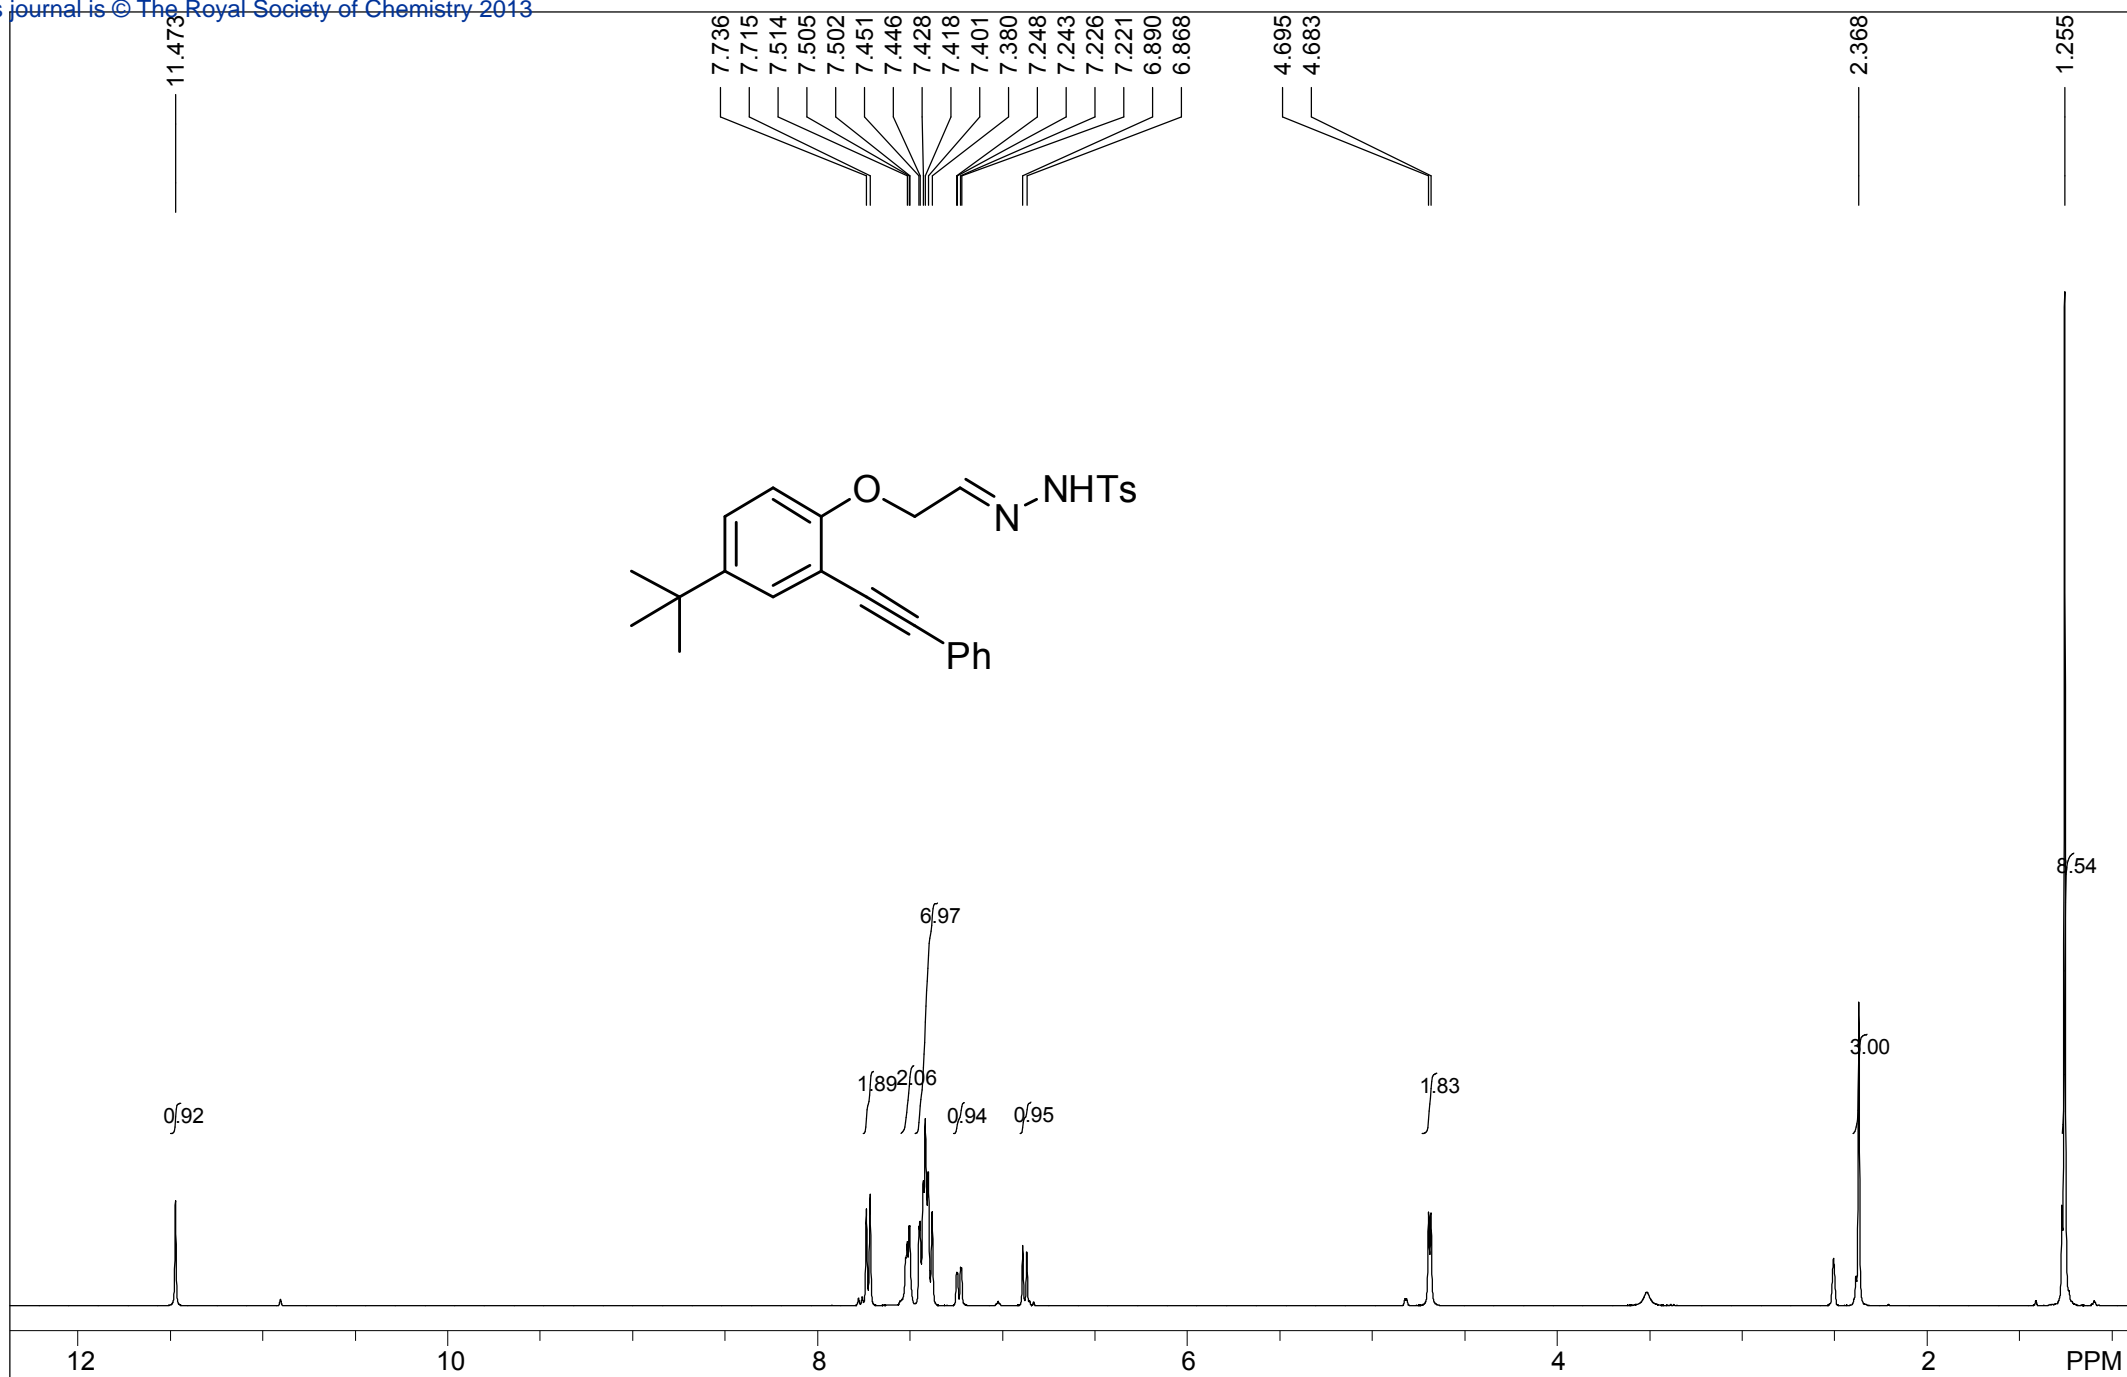

USER: Administr -- DATE: Mon May 02 22:30:22 2011

|             |           |             |             |             |         |                      |                     |
|-------------|-----------|-------------|-------------|-------------|---------|----------------------|---------------------|
| F1: 400.132 | F2: 1.000 | SW1: 8224   |             | OF1: 2472.4 |         | PTS1d: 32768 , 32768 |                     |
| EX: zg30    |           | PW: 13.6 us | PD: 1.0 sec | NA: 2       | LB: 0.0 |                      | Nuts - \$GWQ-2019_2 |

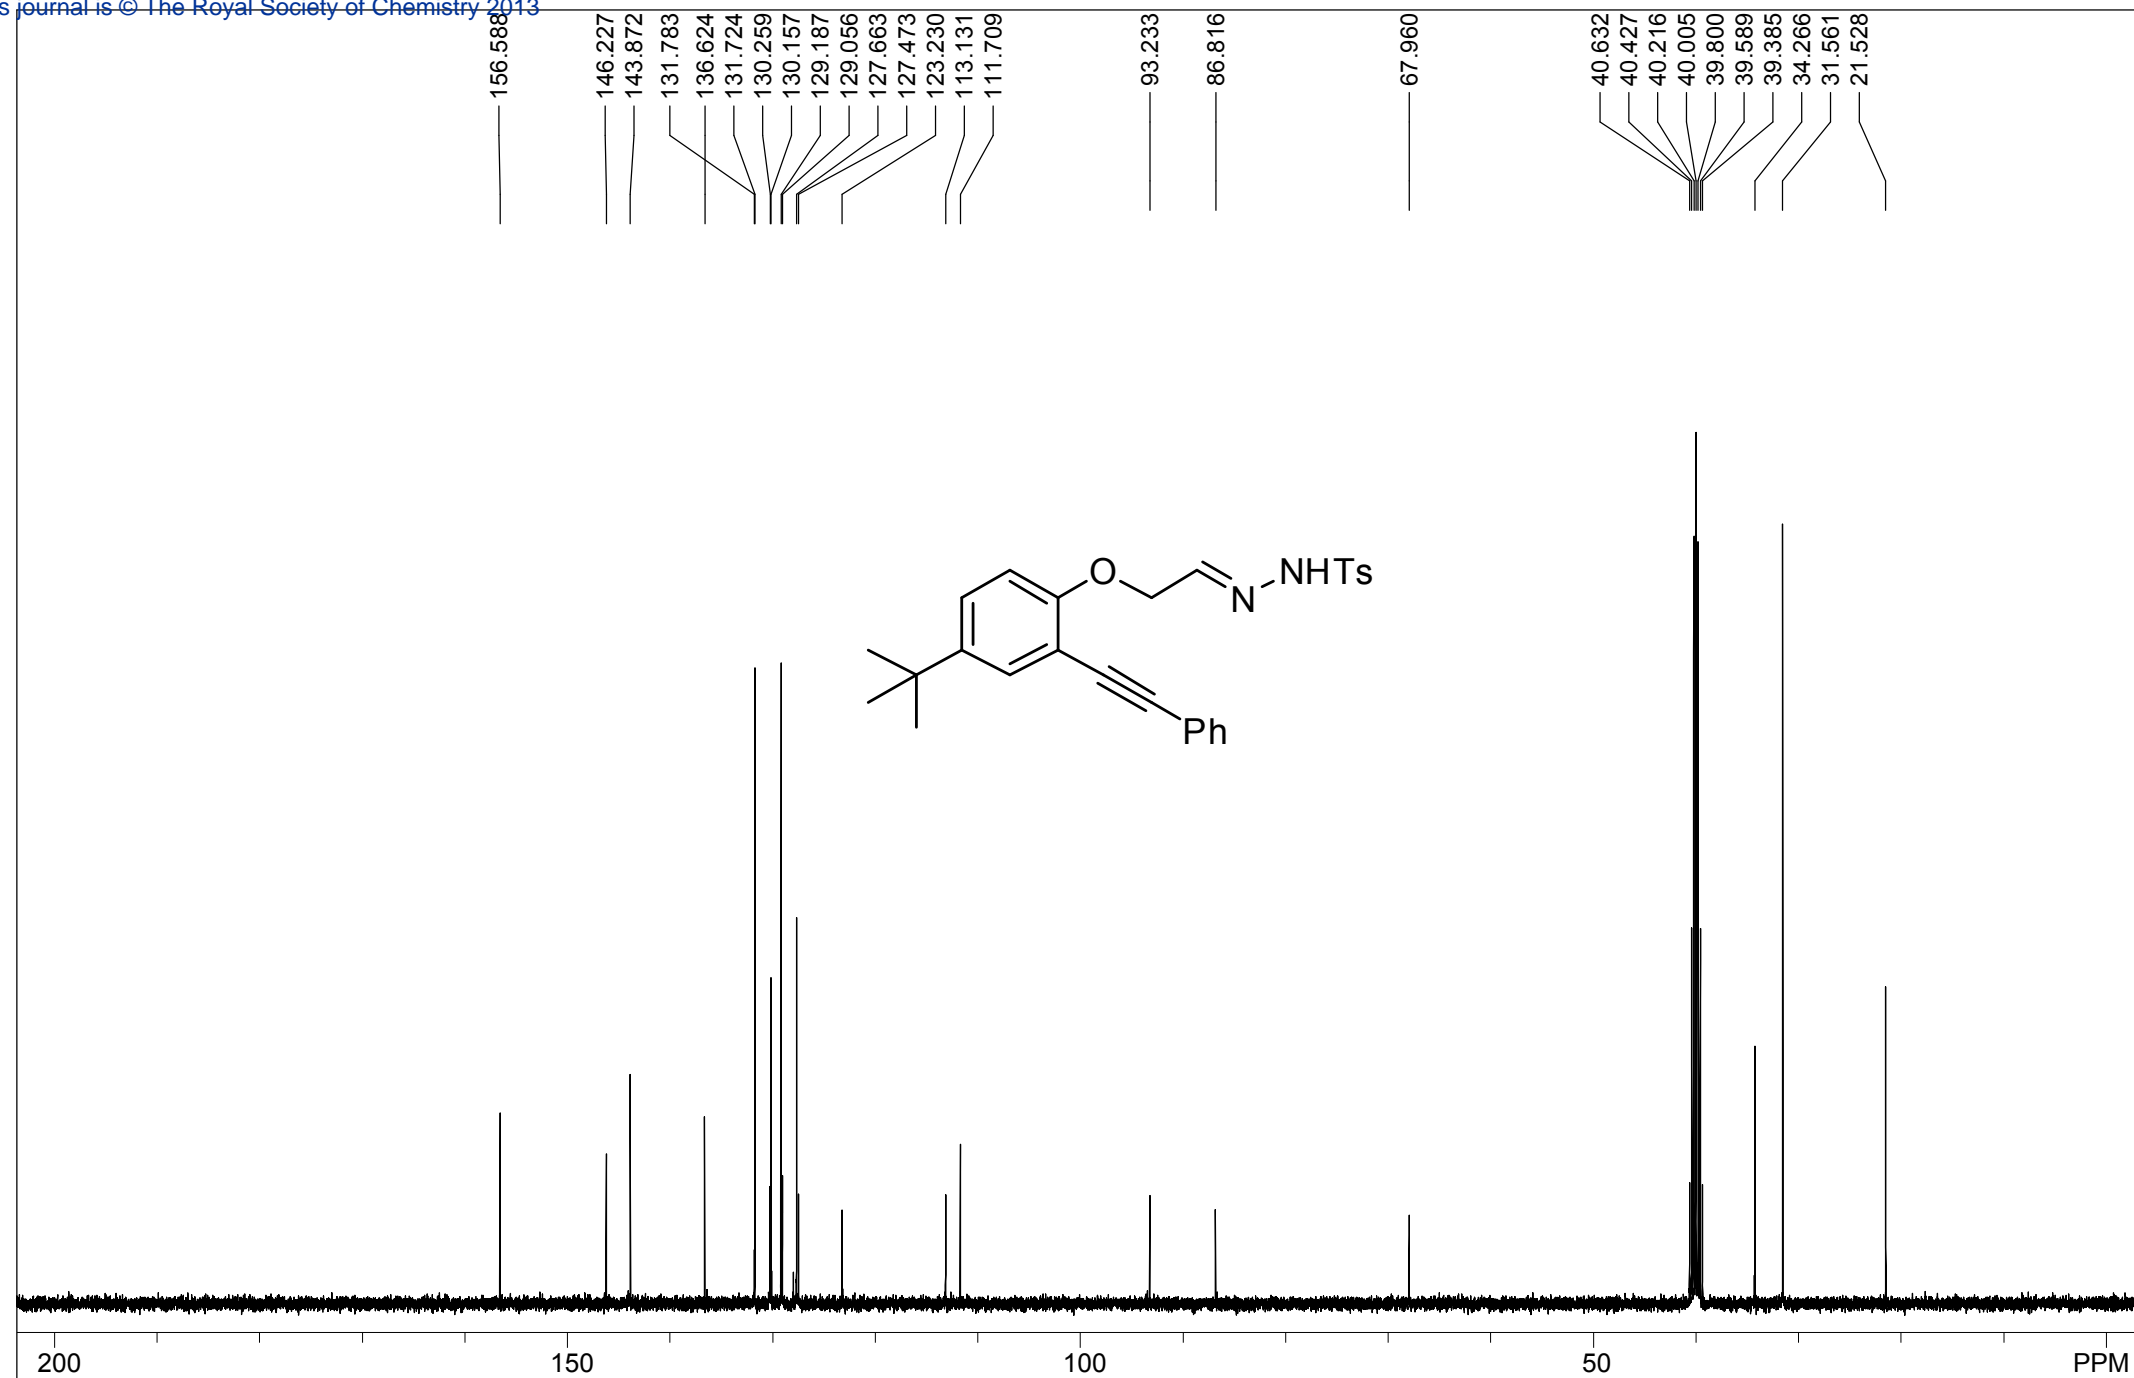

200

150

100

50

PPM

USER: Administr -- DATE: Mon May 02 22:52:37 2011

F1: 100.623

F2: 1.000

SW1: 24038

OF1: 10063.0

PTS1d: 32768 , 32768

EX: zgpg30

PW: 9.5 us

PD: 2.0 sec

NA: 350

LB: 0.0

Nuts - \$GWQ-2019-C\_2

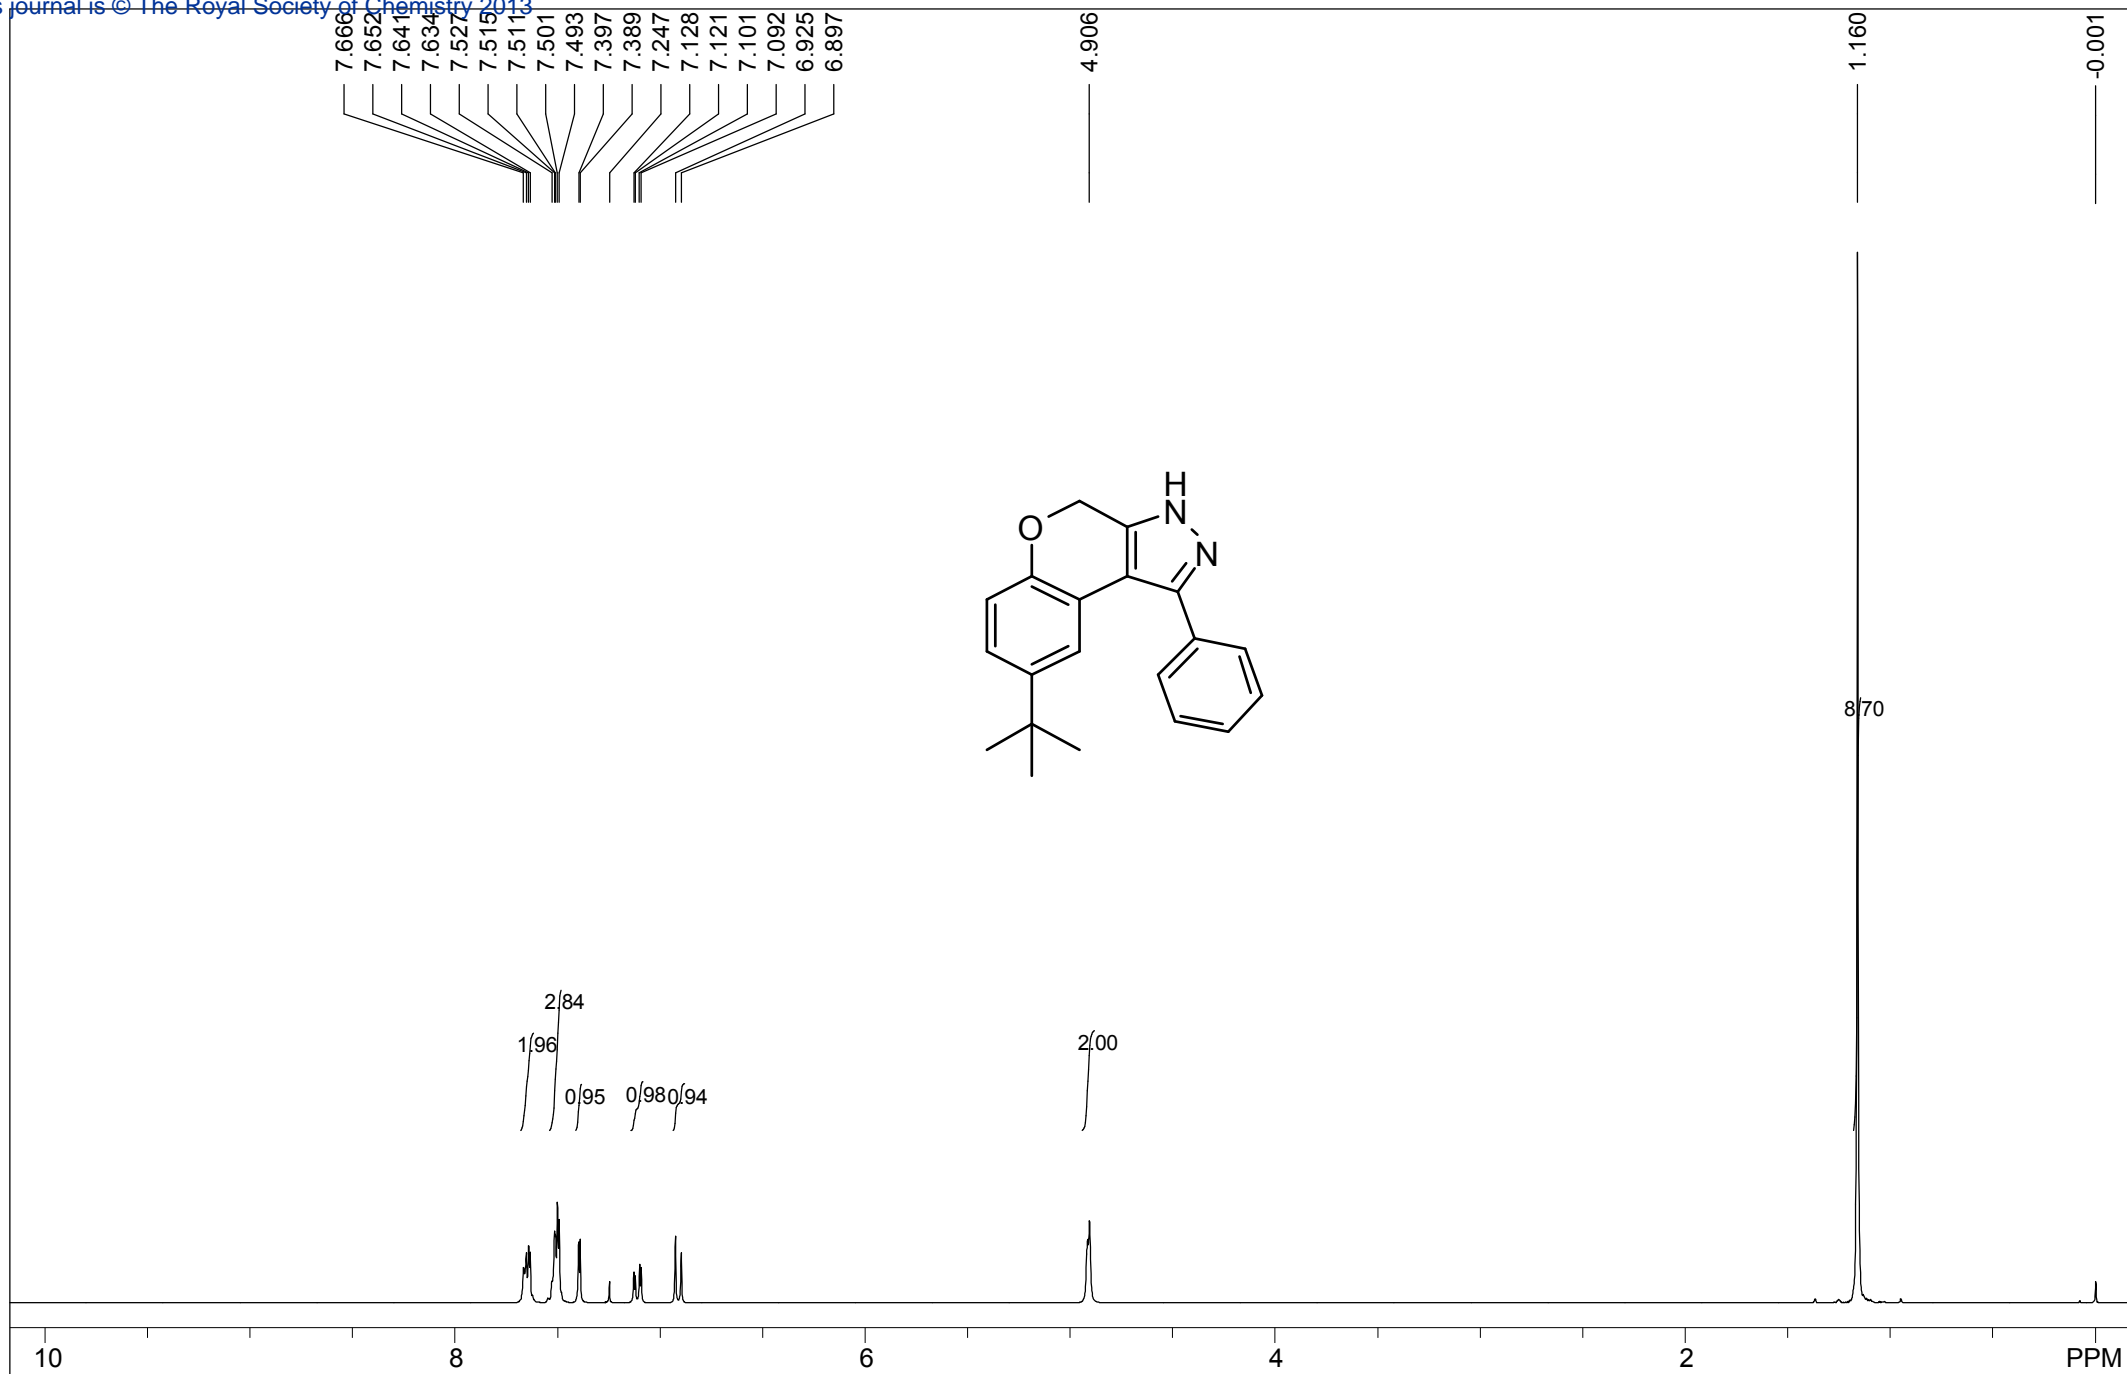

|             |            |            |             |                            |         |                     |  |
|-------------|------------|------------|-------------|----------------------------|---------|---------------------|--|
| .blank line |            |            |             | USER: -- DATE: Apr 14 2011 |         |                     |  |
| F1: 300.028 | F2: 75.449 | SW1: 3602  |             | OF1: 1496.9                |         | PTS1d: 7179 , 8192  |  |
| EX: s2pul   |            | PW: 4.2 us | PD: 1.0 sec | NA: 8                      | LB: 0.0 | Nuts - \$PROTON.fid |  |

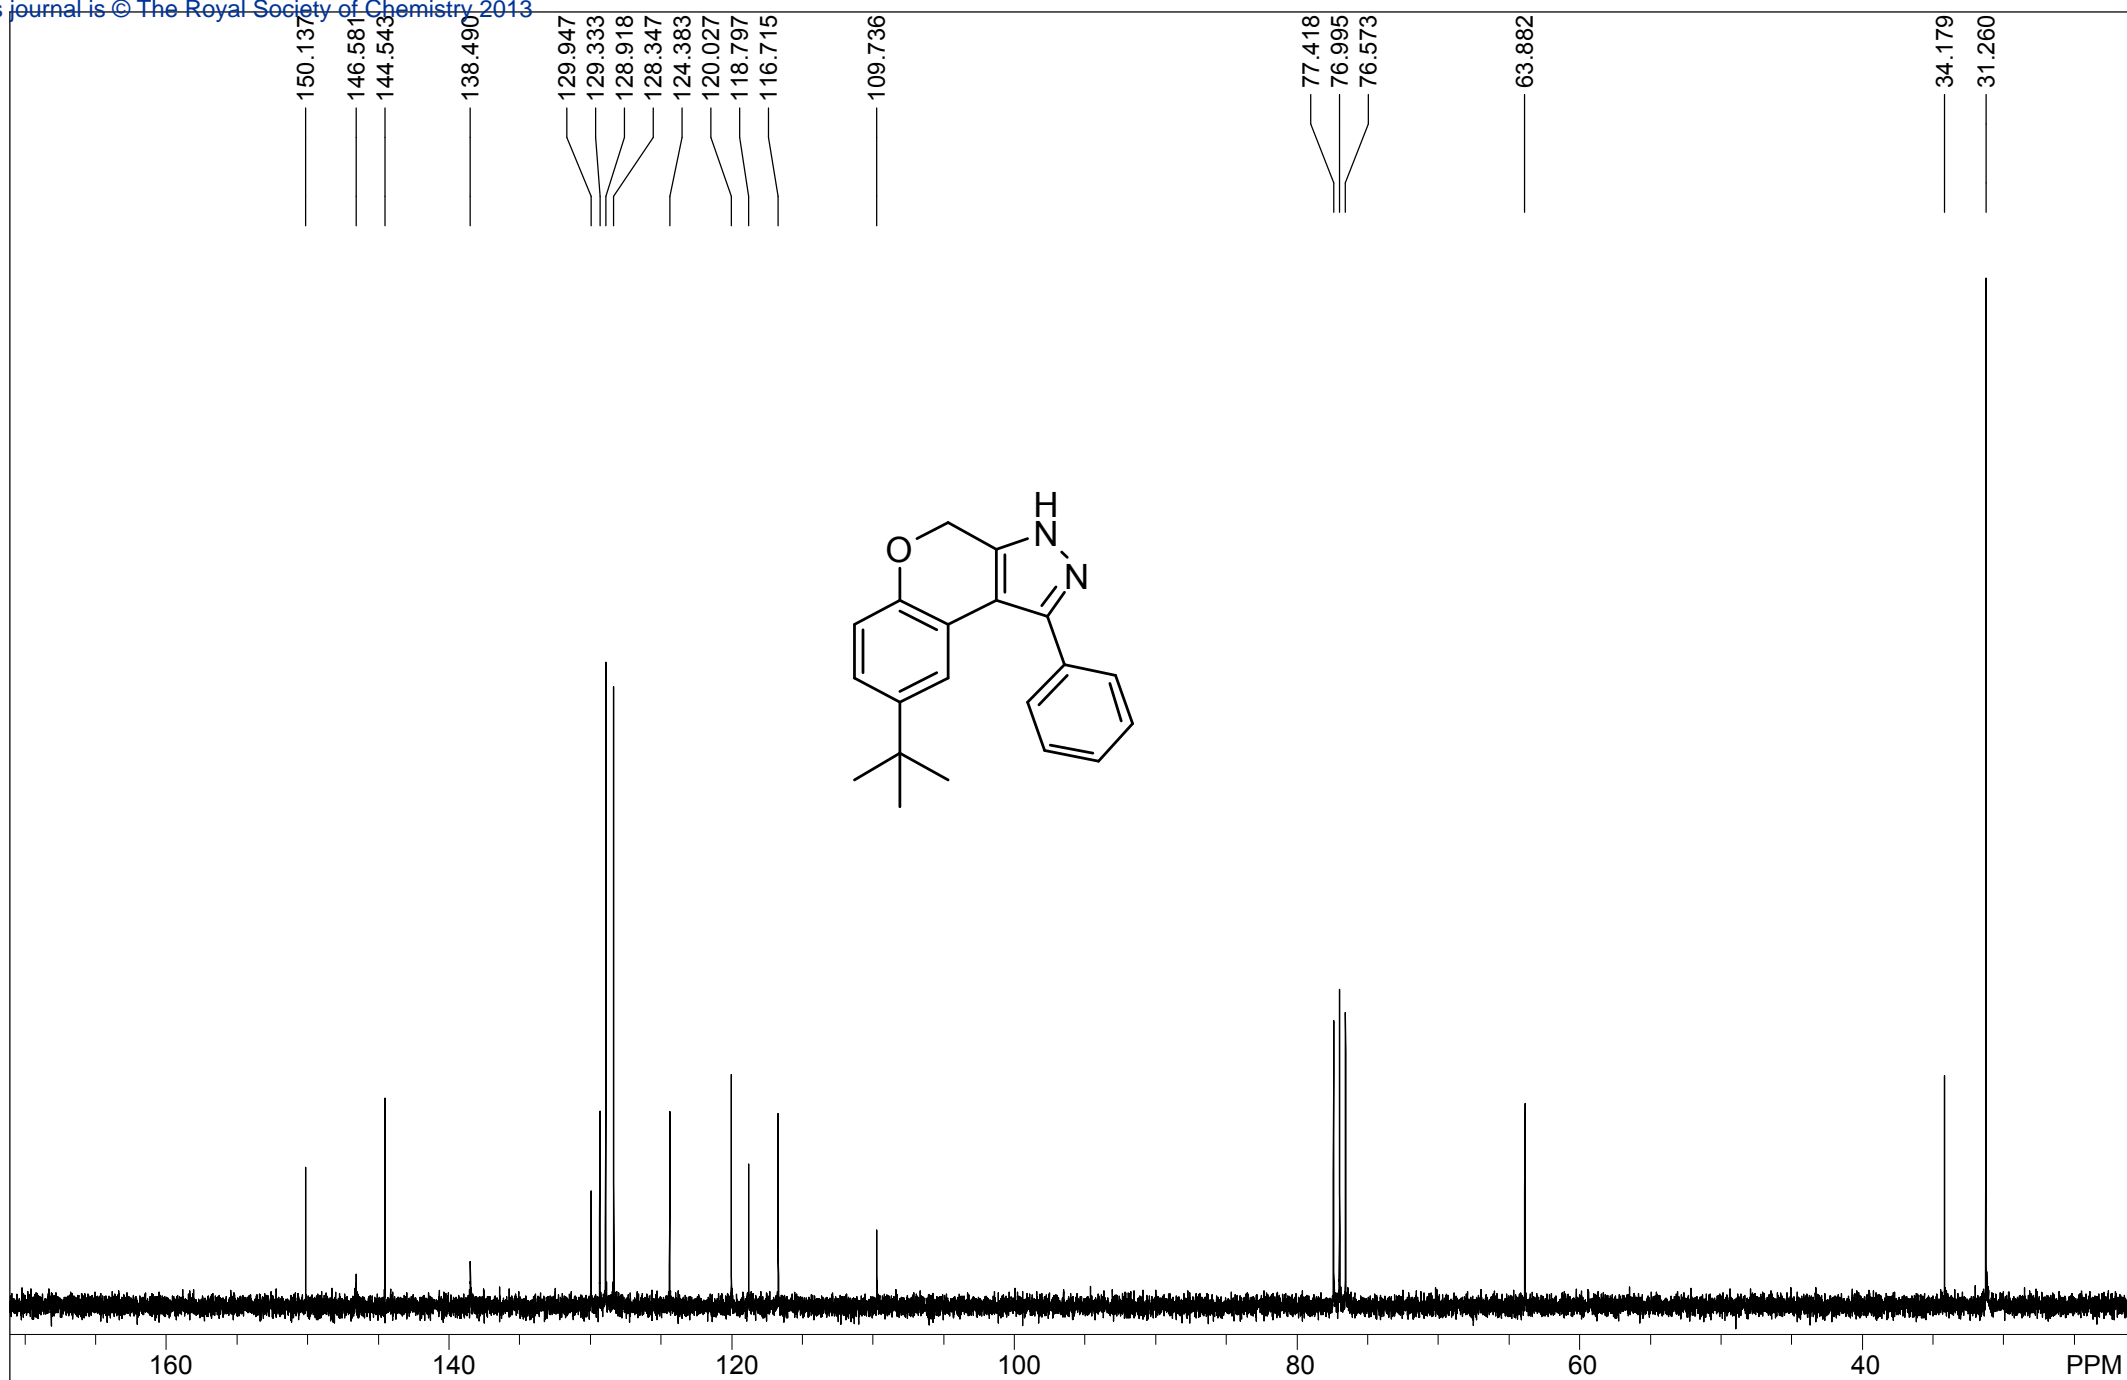

lh-1-5-c

USER: -- DATE: Apr 15 2011

|            |             |            |             |             |         |                      |                       |
|------------|-------------|------------|-------------|-------------|---------|----------------------|-----------------------|
| F1: 75.450 | F2: 300.028 | SW1: 18315 |             | OF1: 7826.2 |         | PTS1d: 23809 , 32768 |                       |
| EX: s2pul  |             | PW: 4.6 us | PD: 1.0 sec | NA: 332     | LB: 0.0 |                      | Nuts - \$lh-1-5-c.fid |



7.623  
7.622  
7.618  
7.561  
7.552  
7.542  
7.537  
7.360  
7.354  
7.341  
7.332  
6.703  
6.681

4.702  
4.282  
4.265  
4.246  
4.229

1.294  
1.276  
1.258

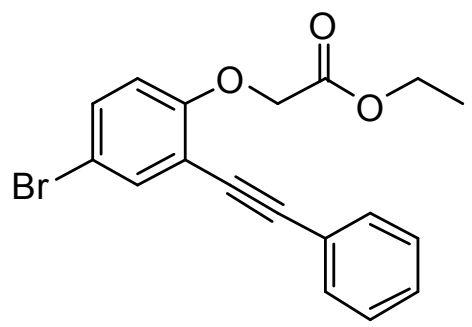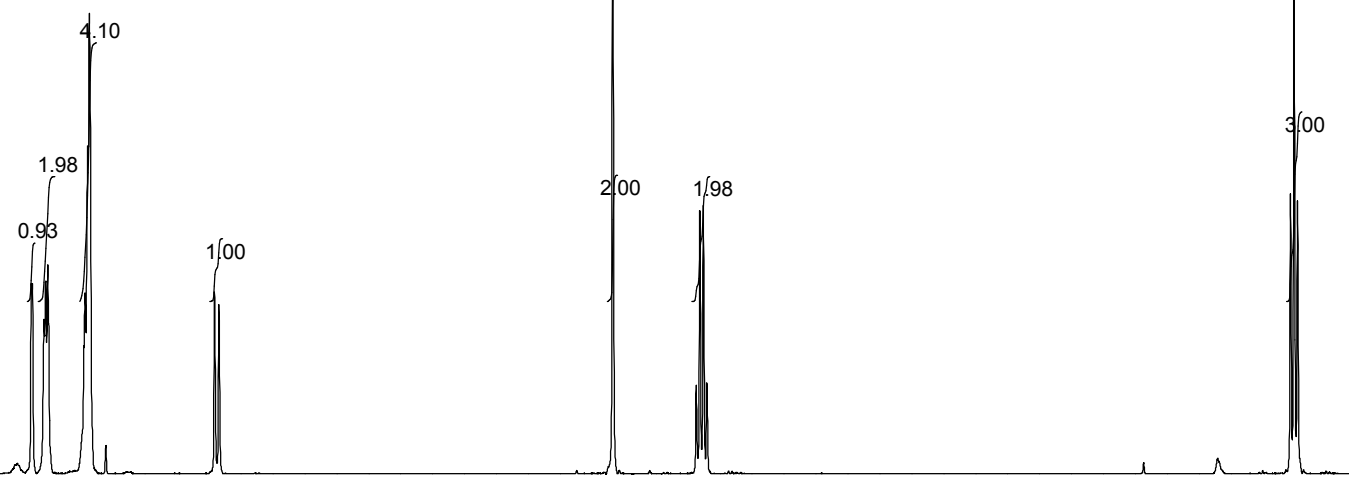

10 8 6 4 2 0 PPM

USER: Administr -- DATE: Fri May 13 21:51:20 2011

|             |             |             |             |                      |                     |
|-------------|-------------|-------------|-------------|----------------------|---------------------|
| F1: 400.132 | F2: 1.000   | SW1: 8224   | OF1: 2458.9 | PTS1d: 32768 , 32768 |                     |
| EX: zg30    | PW: 13.6 us | PD: 1.0 sec | NA: 2       | LB: 0.0              | Nuts - \$GWQ-2044_1 |

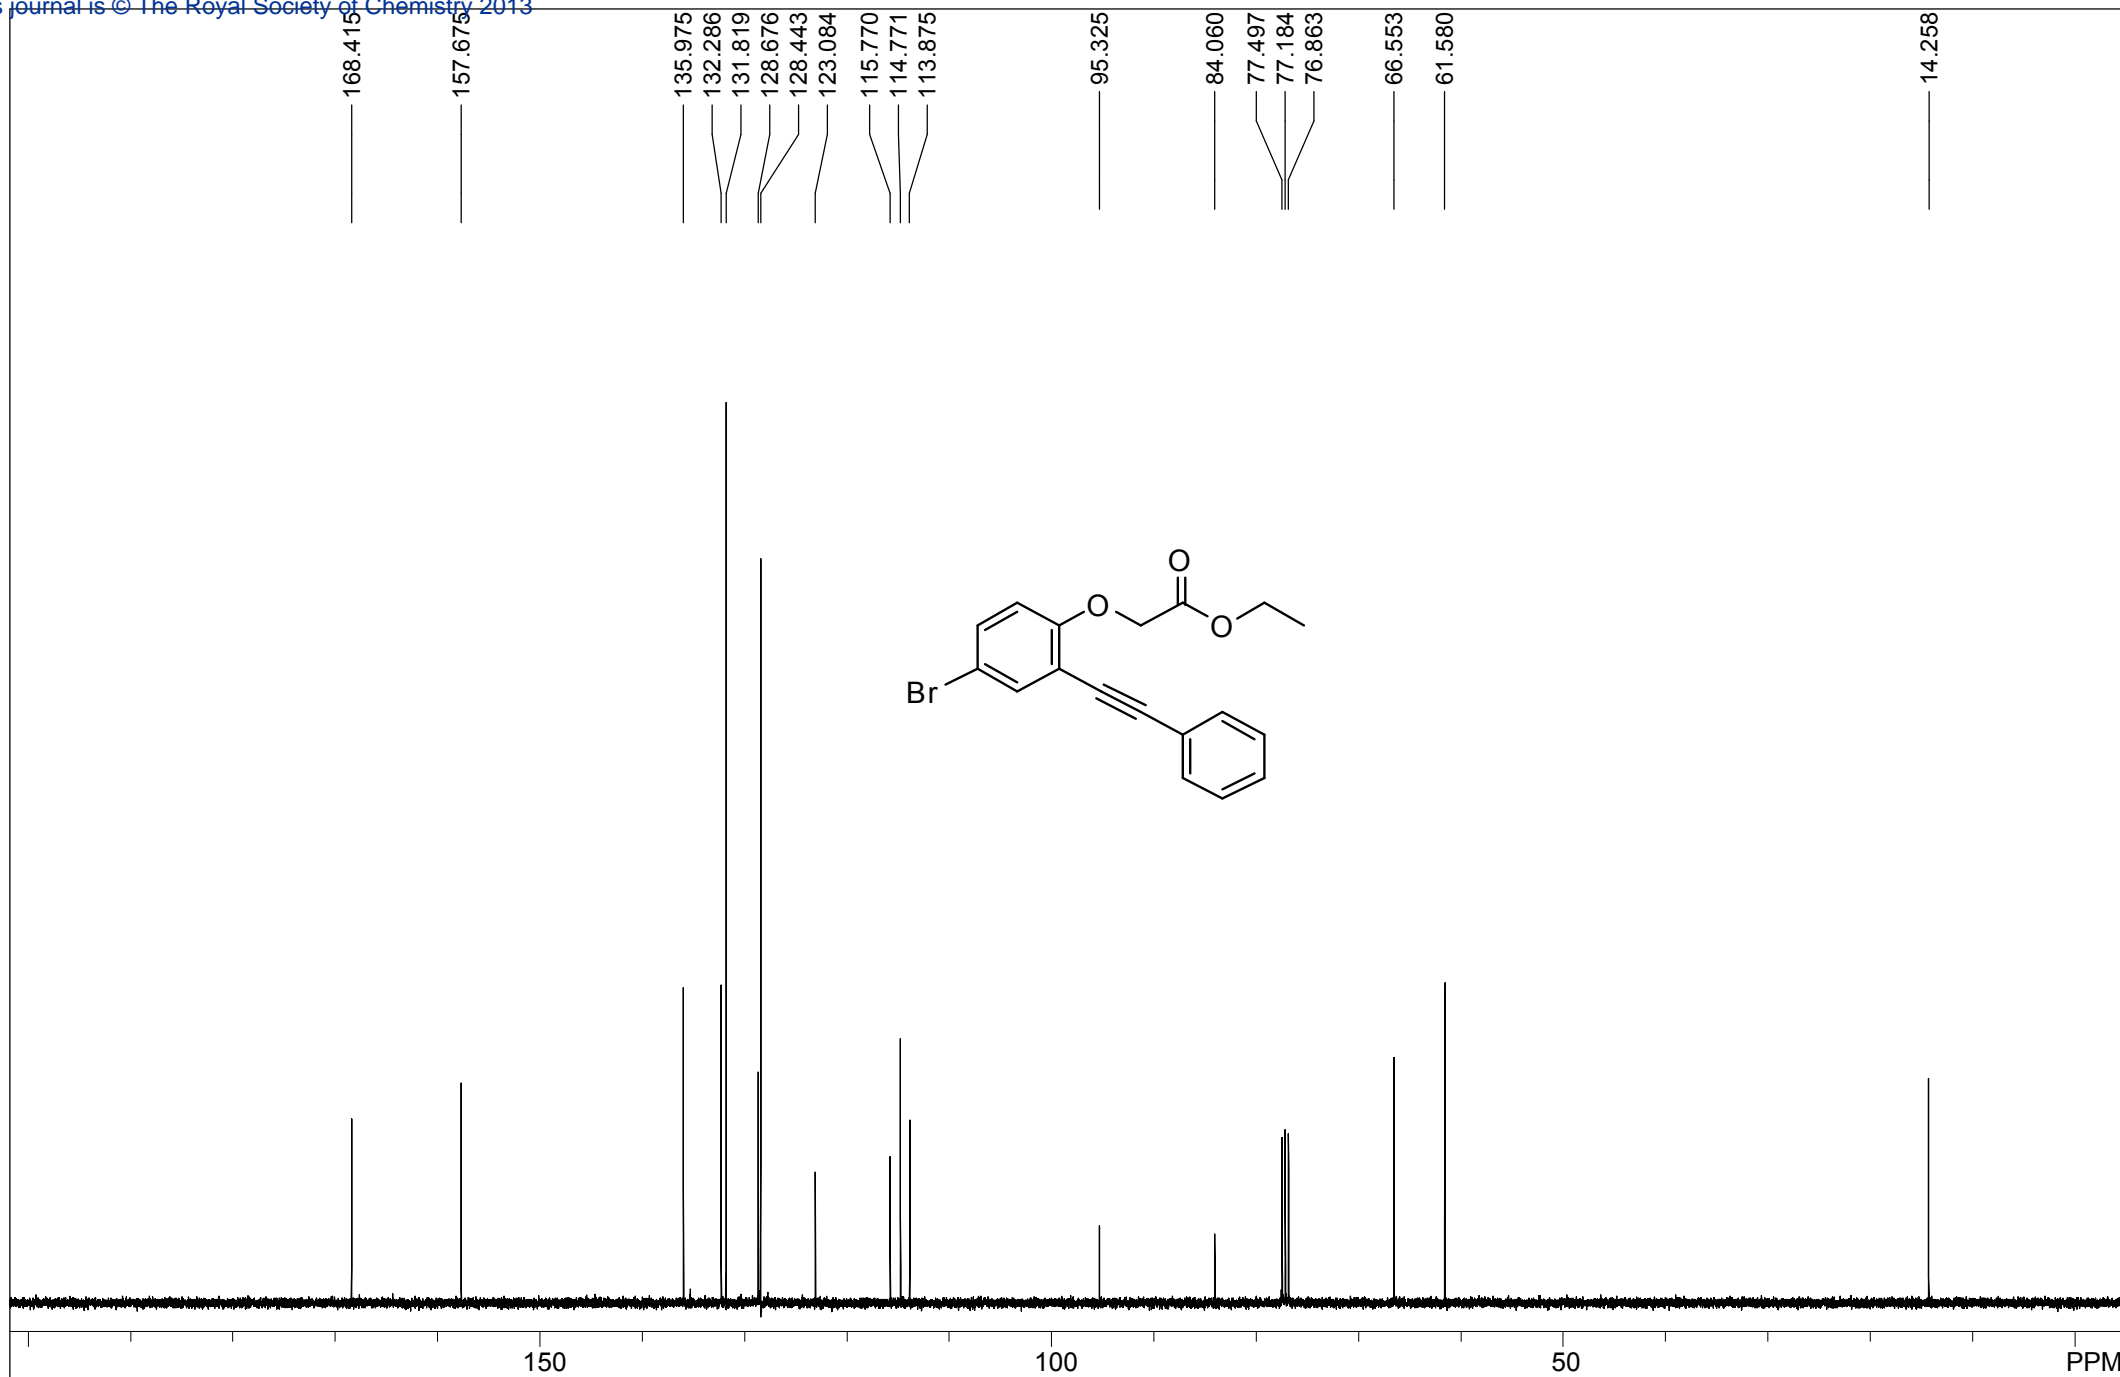

168.419

157.679

135.975

132.286

131.819

128.676

128.443

123.084

115.770

114.771

113.875

95.325

84.060

77.497

77.184

76.863

66.553

61.580

14.258

150

100

50

PPM

USER: Administr -- DATE: Fri May 13 23:03:50 2011

|             |            |             |              |                      |
|-------------|------------|-------------|--------------|----------------------|
| F1: 100.623 | F2: 1.000  | SW1: 24038  | OF1: 10070.3 | PTS1d: 32768 , 32768 |
| EX: zgpg30  | PW: 9.5 us | PD: 2.0 sec | NA: 200      | LB: 0.0              |

Nuts - \$GWQ-2044\_3

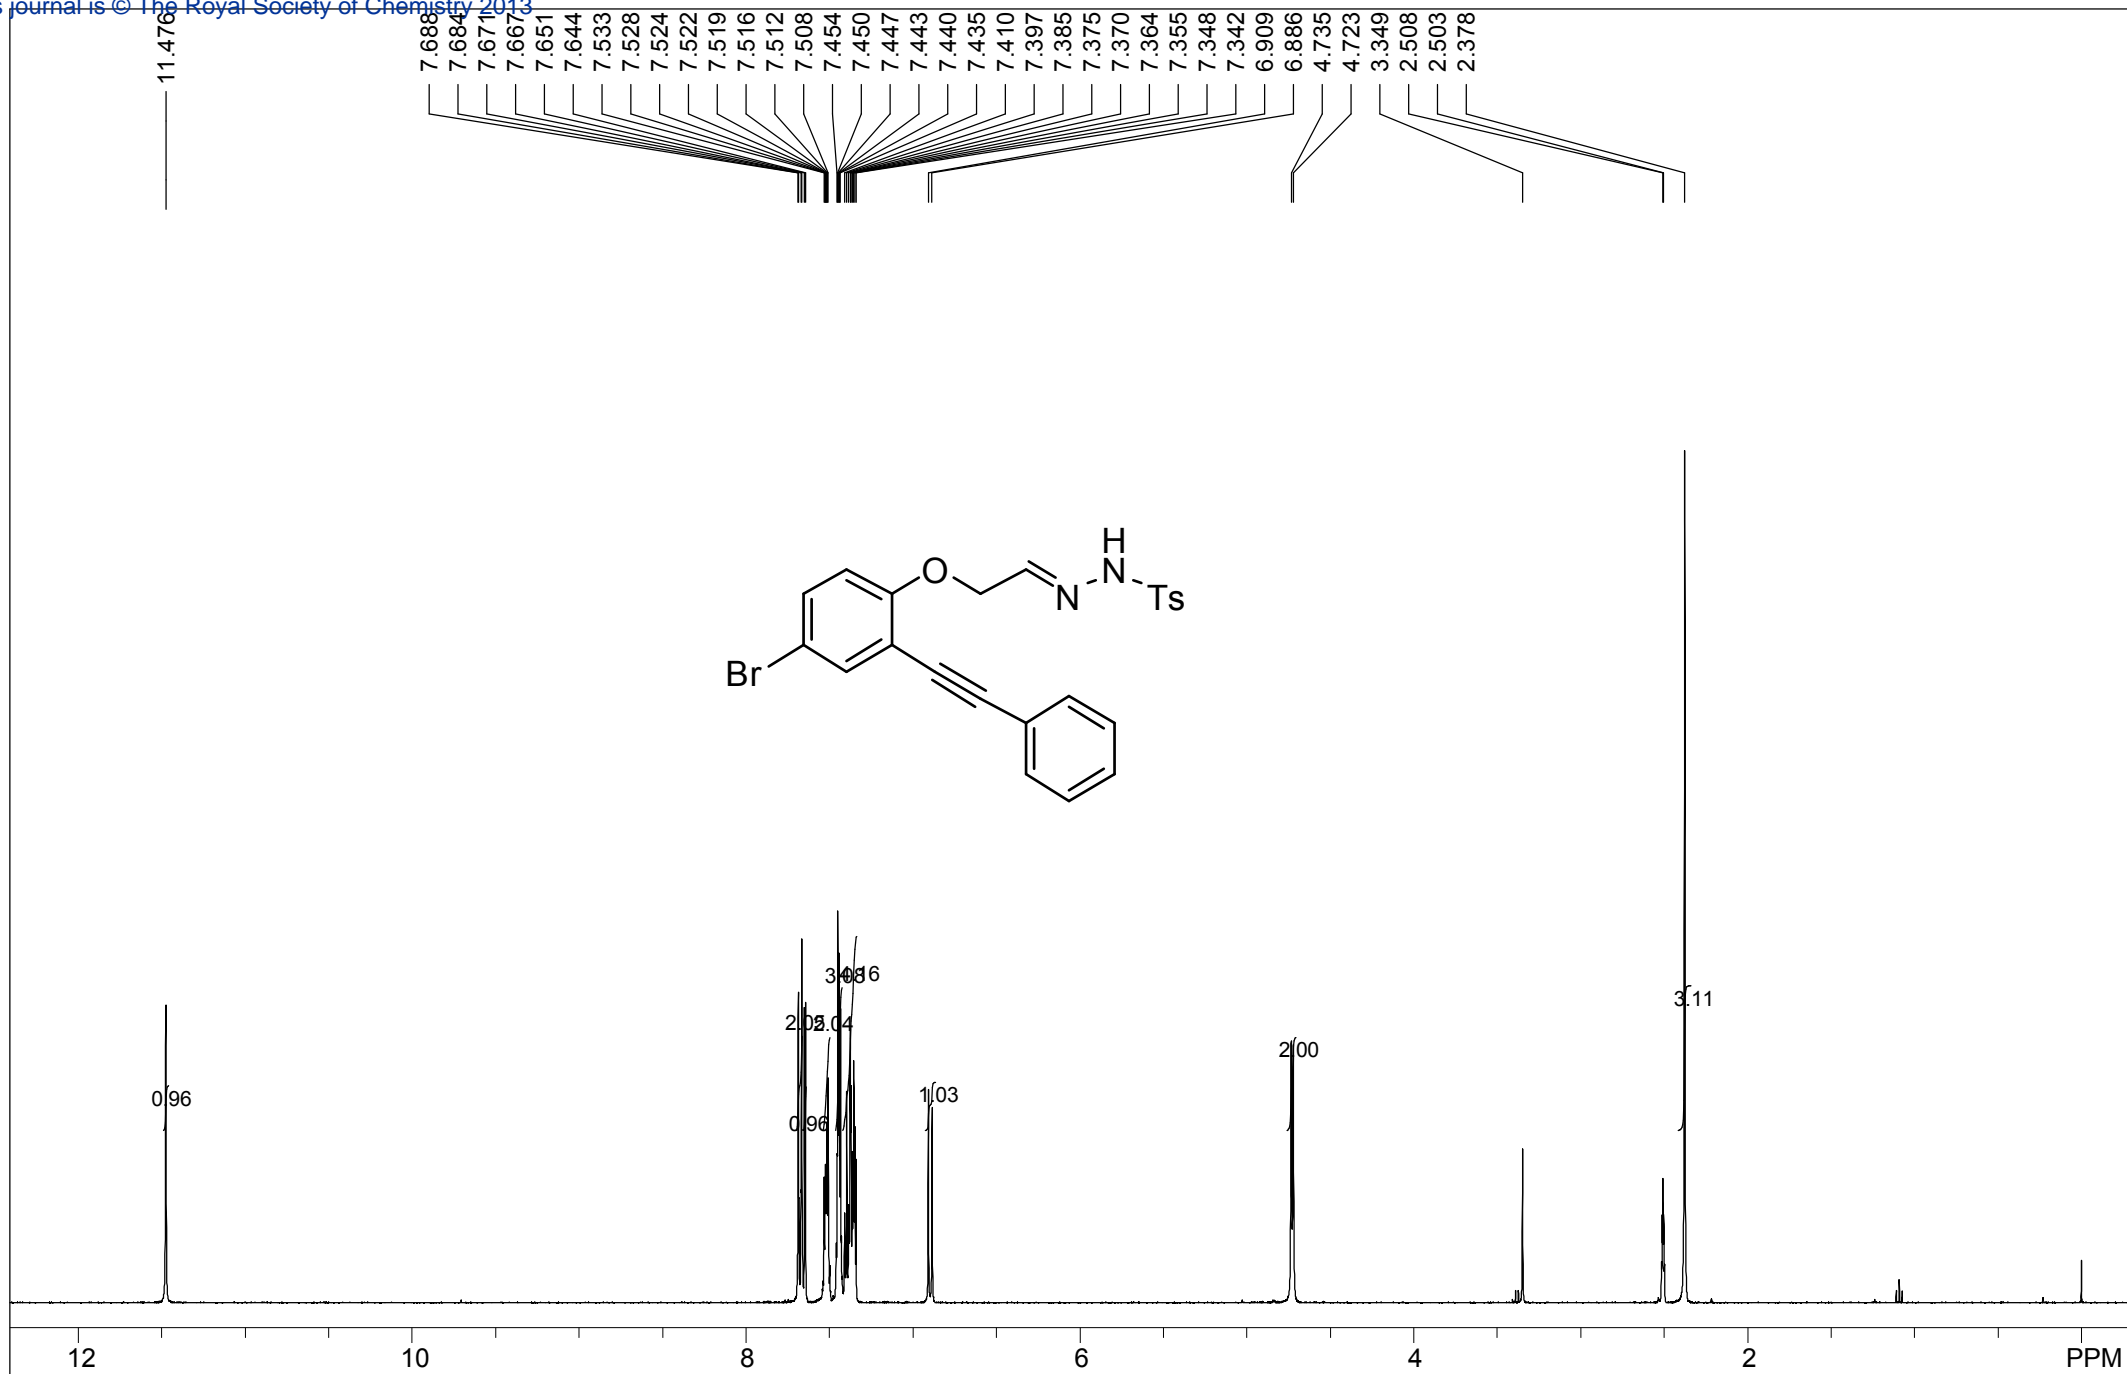

USER: Administr -- DATE: Sat May 28 07:27:05 2011

|             |             |             |             |                      |
|-------------|-------------|-------------|-------------|----------------------|
| F1: 400.132 | F2: 1.000   | SW1: 8224   | OF1: 2471.0 | PTS1d: 32768 , 32768 |
| EX: zg30    | PW: 13.6 us | PD: 1.0 sec | NA: 2       | LB: 0.0              |

Nuts - \$GWQ-2049\_1

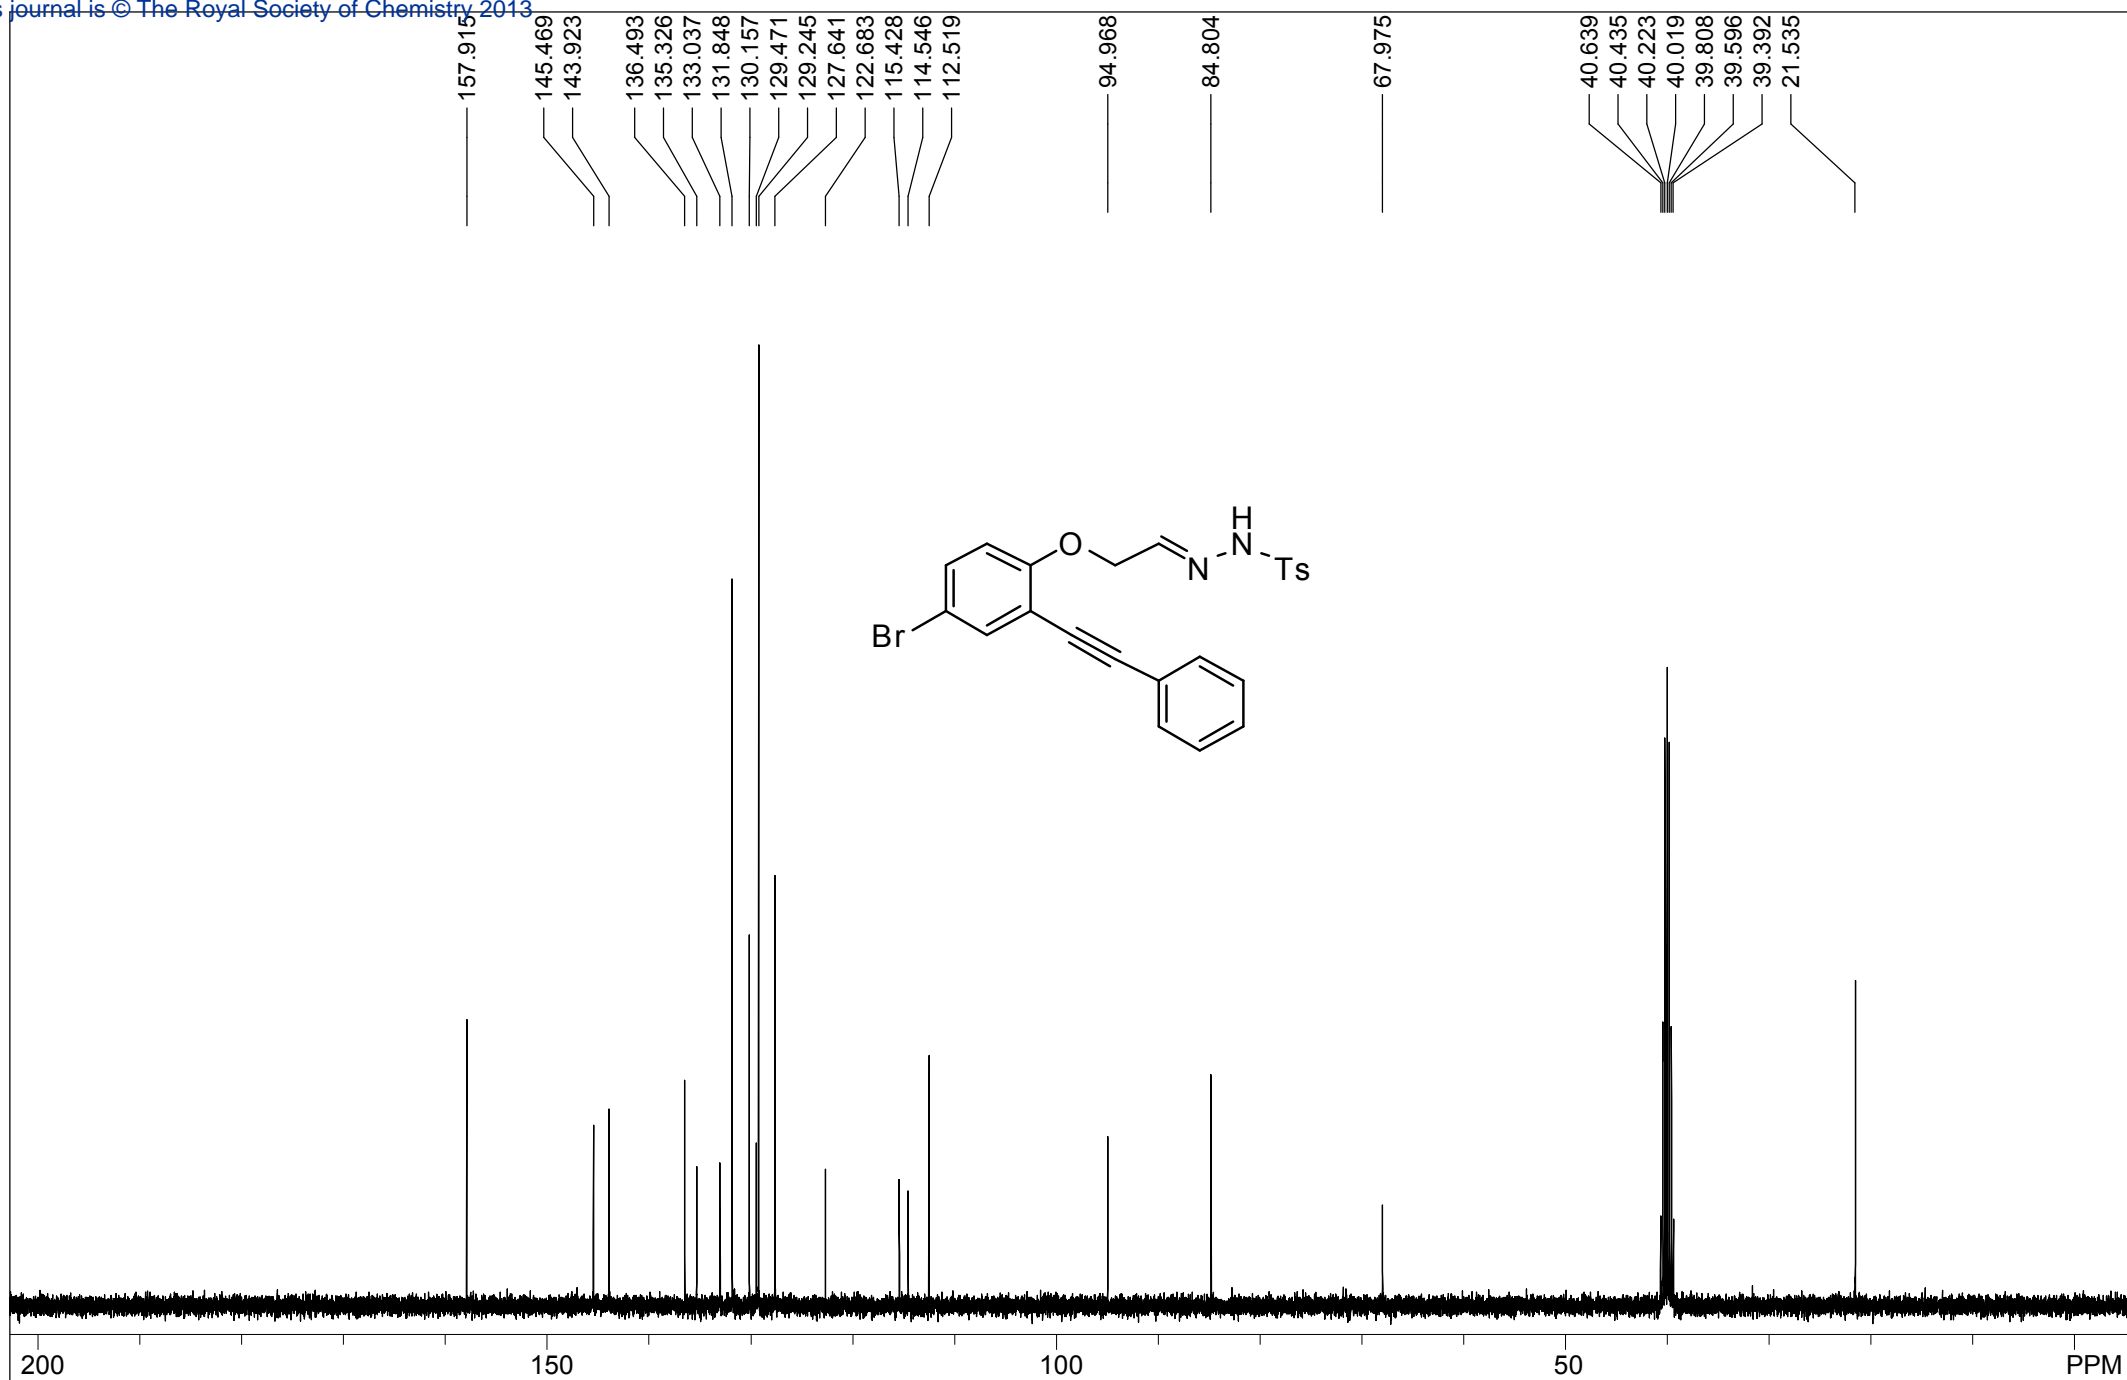

200 150 100 50 PPM

USER: Administr -- DATE: Sat May 28 11:02:07 2011

|             |            |             |              |                      |
|-------------|------------|-------------|--------------|----------------------|
| F1: 100.623 | F2: 1.000  | SW1: 24038  | OF1: 10063.0 | PTS1d: 32768 , 32768 |
| EX: zgpg30  | PW: 9.5 us | PD: 2.0 sec | NA: 100      | LB: 0.0              |

Nuts - \$GWQ-2049\_3

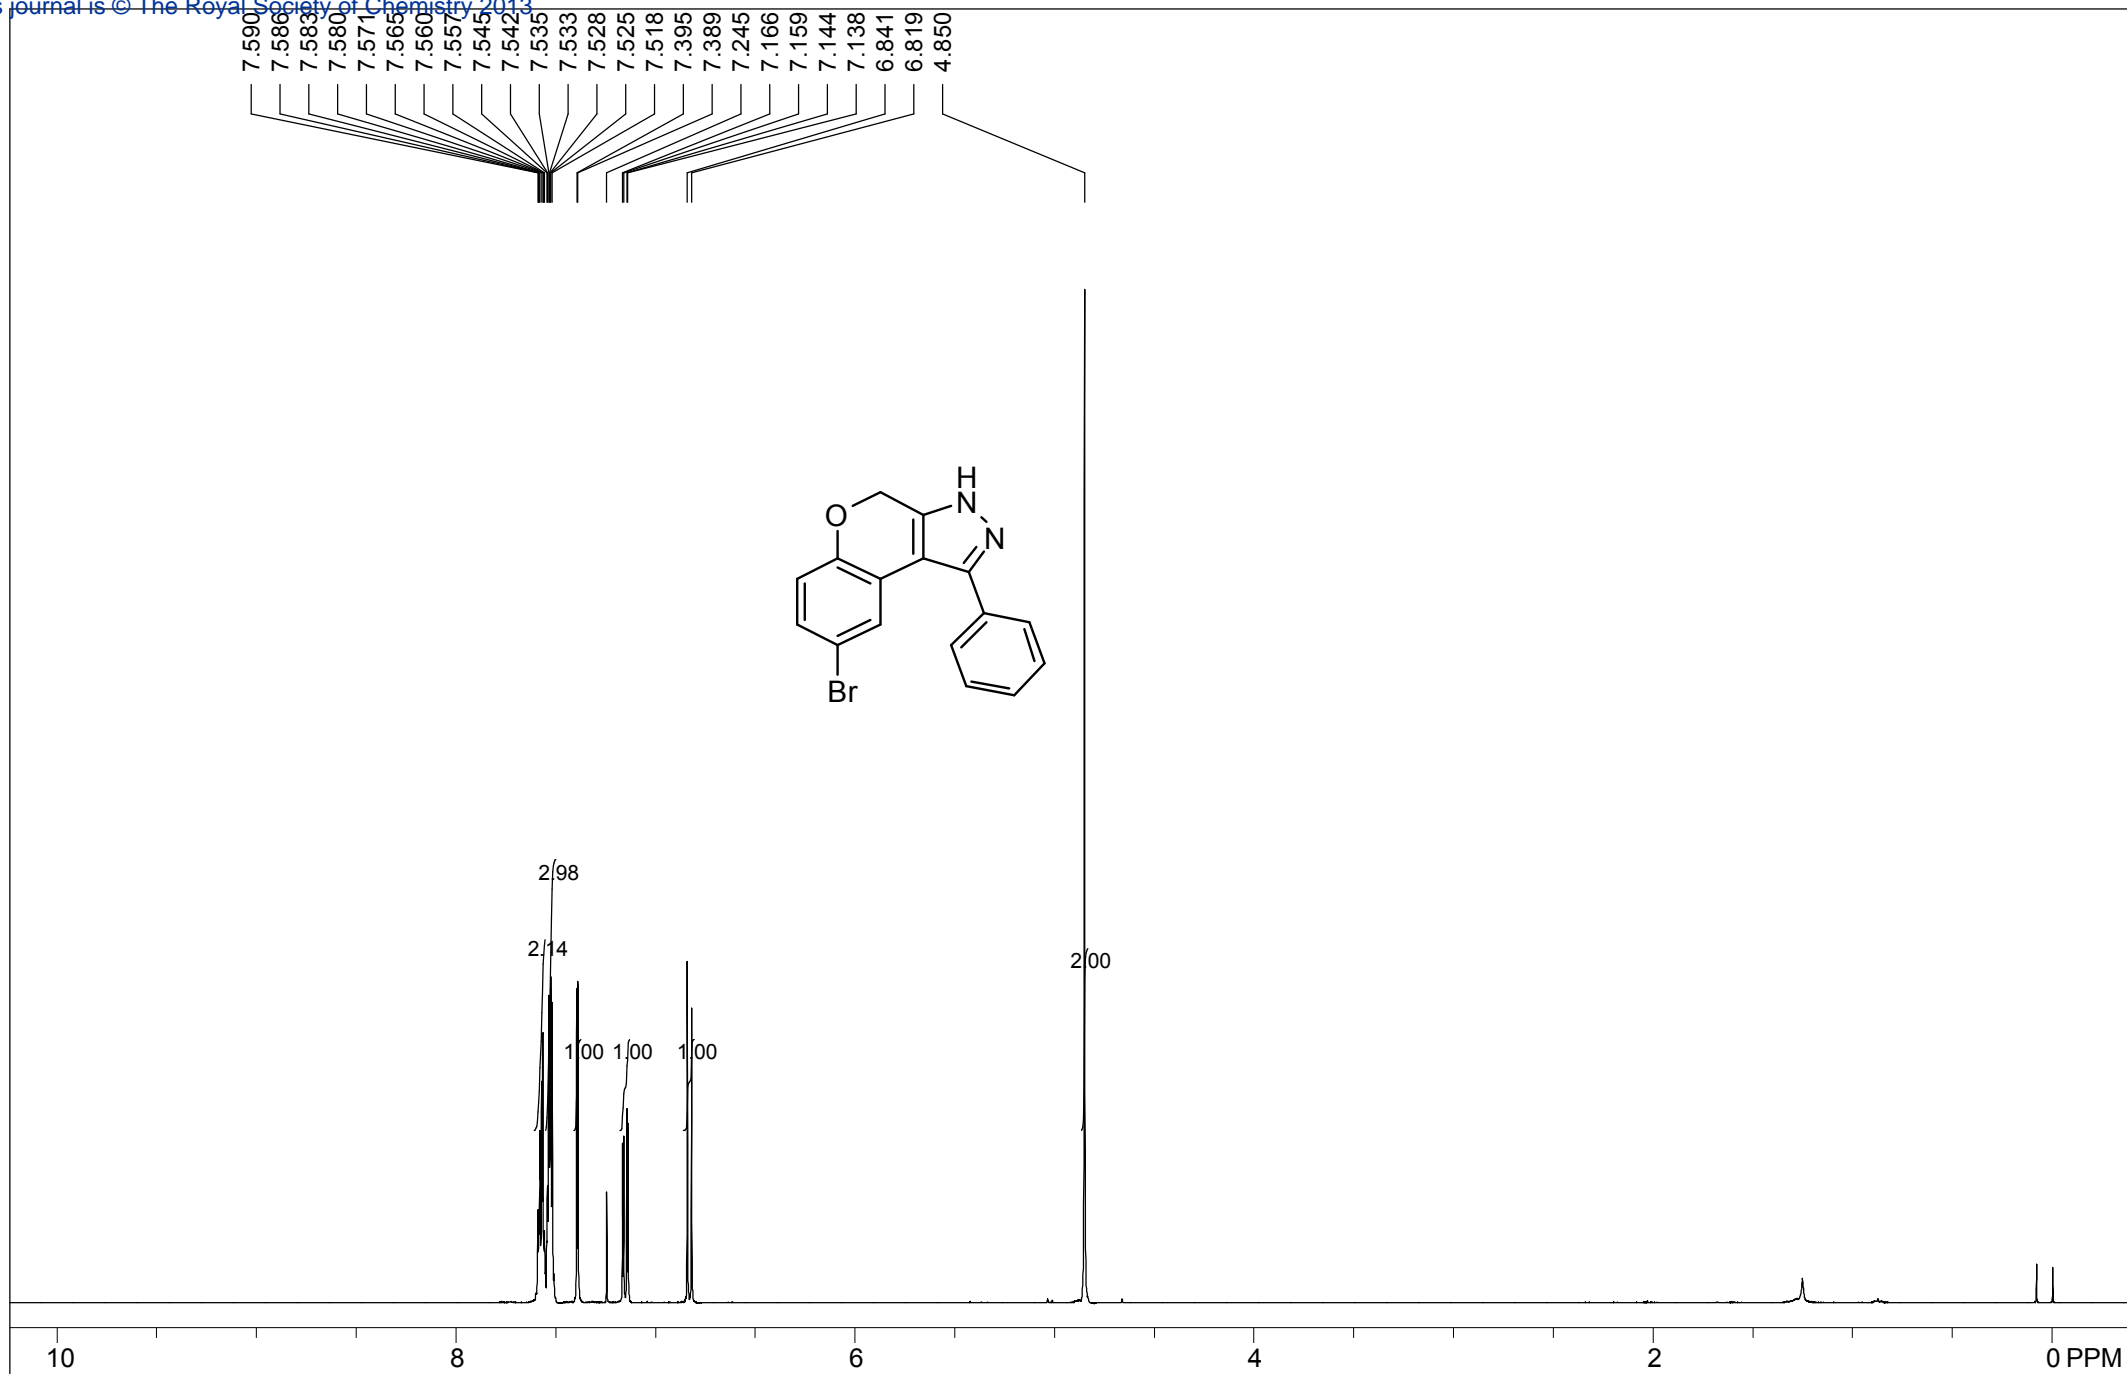

USER: Administr -- DATE: Mon May 30 22:35:05 2011

|             |           |             |             |             |         |                      |                     |
|-------------|-----------|-------------|-------------|-------------|---------|----------------------|---------------------|
| F1: 400.132 | F2: 1.000 | SW1: 8224   |             | OF1: 2455.3 |         | PTS1d: 32768 , 32768 |                     |
| EX: zg30    |           | PW: 13.6 us | PD: 1.0 sec | NA: 2       | LB: 0.0 |                      | Nuts - \$GWQ-2050_2 |

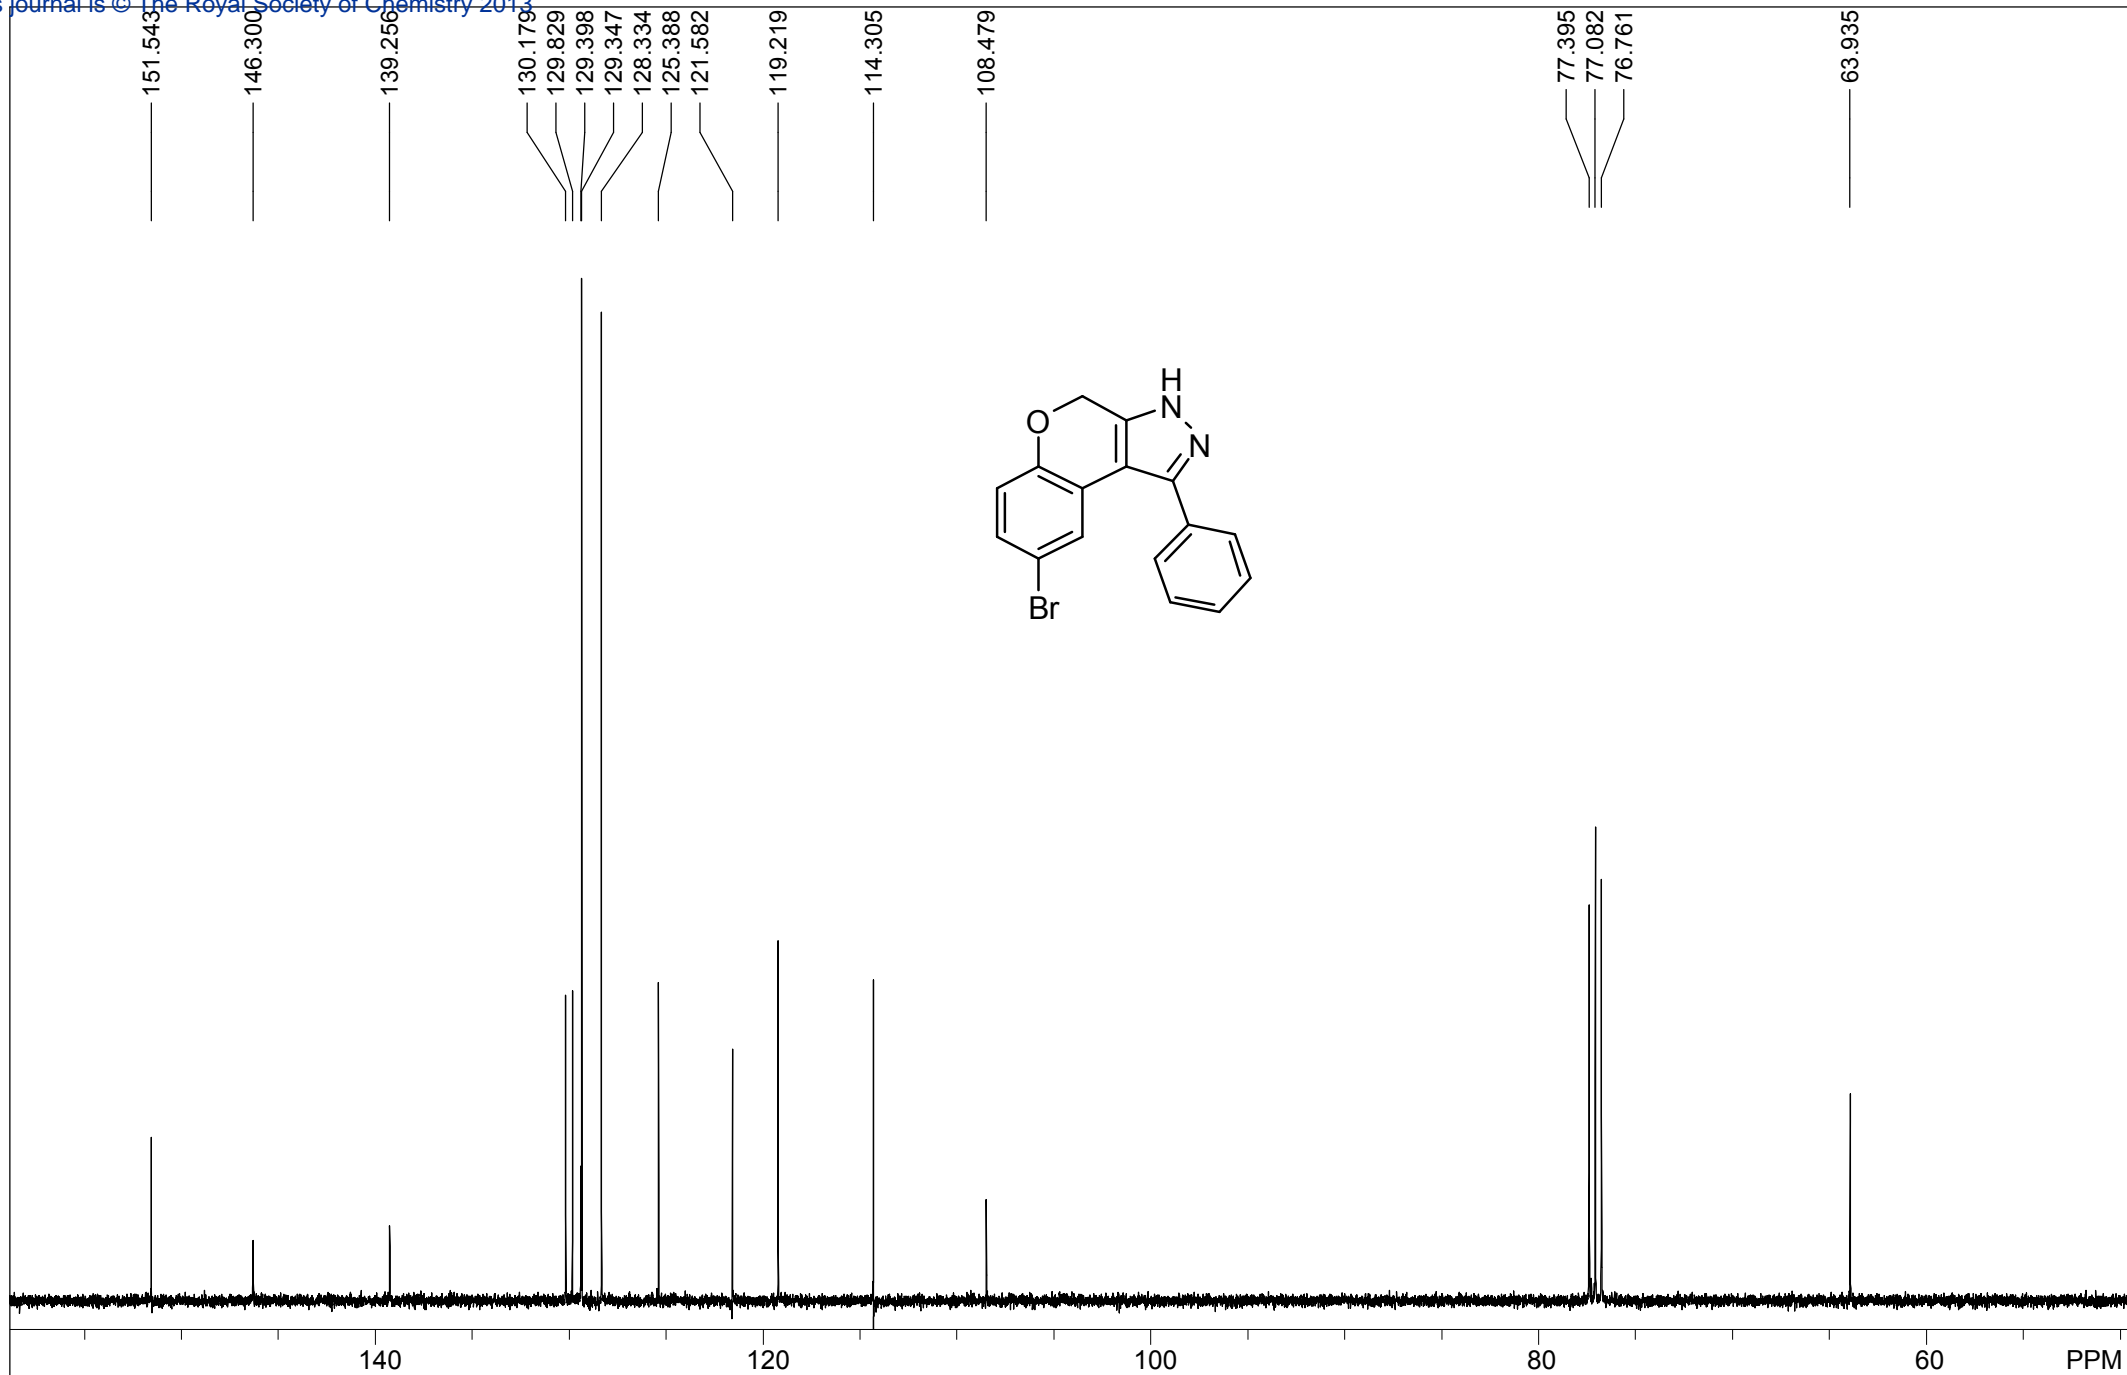

USER: Administr -- DATE: Mon May 30 22:43:21 2011

|             |           |            |             |              |         |                      |                     |
|-------------|-----------|------------|-------------|--------------|---------|----------------------|---------------------|
| F1: 100.623 | F2: 1.000 | SW1: 24038 |             | OF1: 10063.0 |         | PTS1d: 32768 , 32768 |                     |
| EX: zgpg30  |           | PW: 9.5 us | PD: 2.0 sec | NA: 201      | LB: 0.0 |                      | Nuts - \$GWQ-2050_3 |

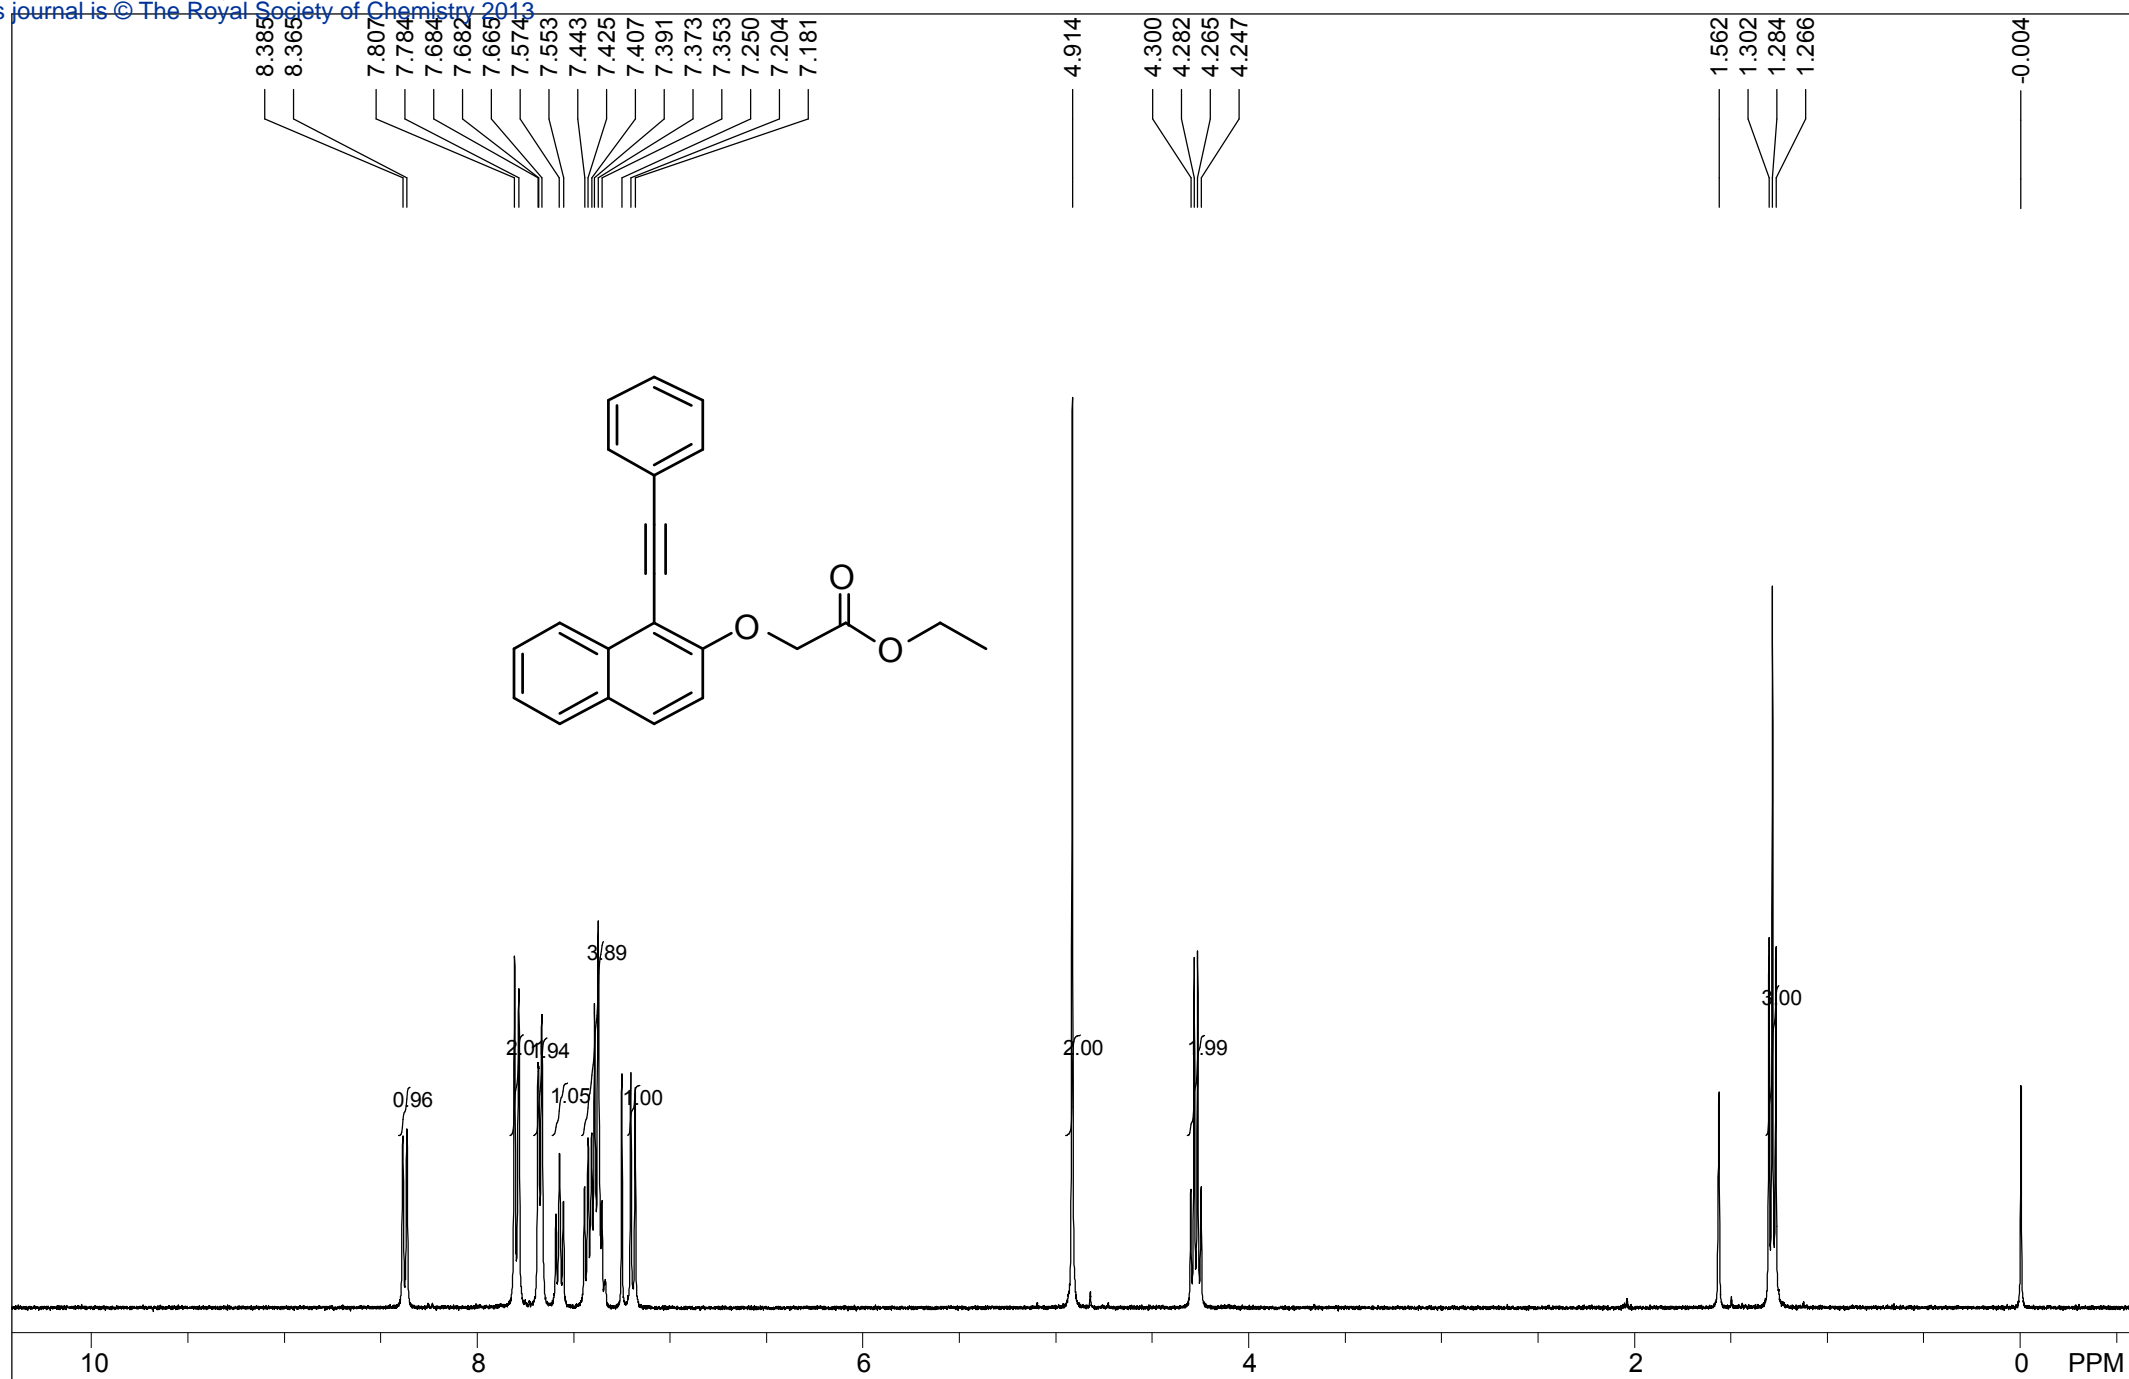

USER: Administr -- DATE: Sat Apr 23 10:31:11 2011

|             |           |             |             |             |         |                      |
|-------------|-----------|-------------|-------------|-------------|---------|----------------------|
| F1: 400.132 | F2: 1.000 | SW1: 8224   |             | OF1: 2458.9 |         | PTS1d: 32768 , 32768 |
| EX: zg30    |           | PW: 13.6 us | PD: 1.0 sec | NA: 2       | LB: 0.0 | Nuts - \$GWQ-2037_1  |

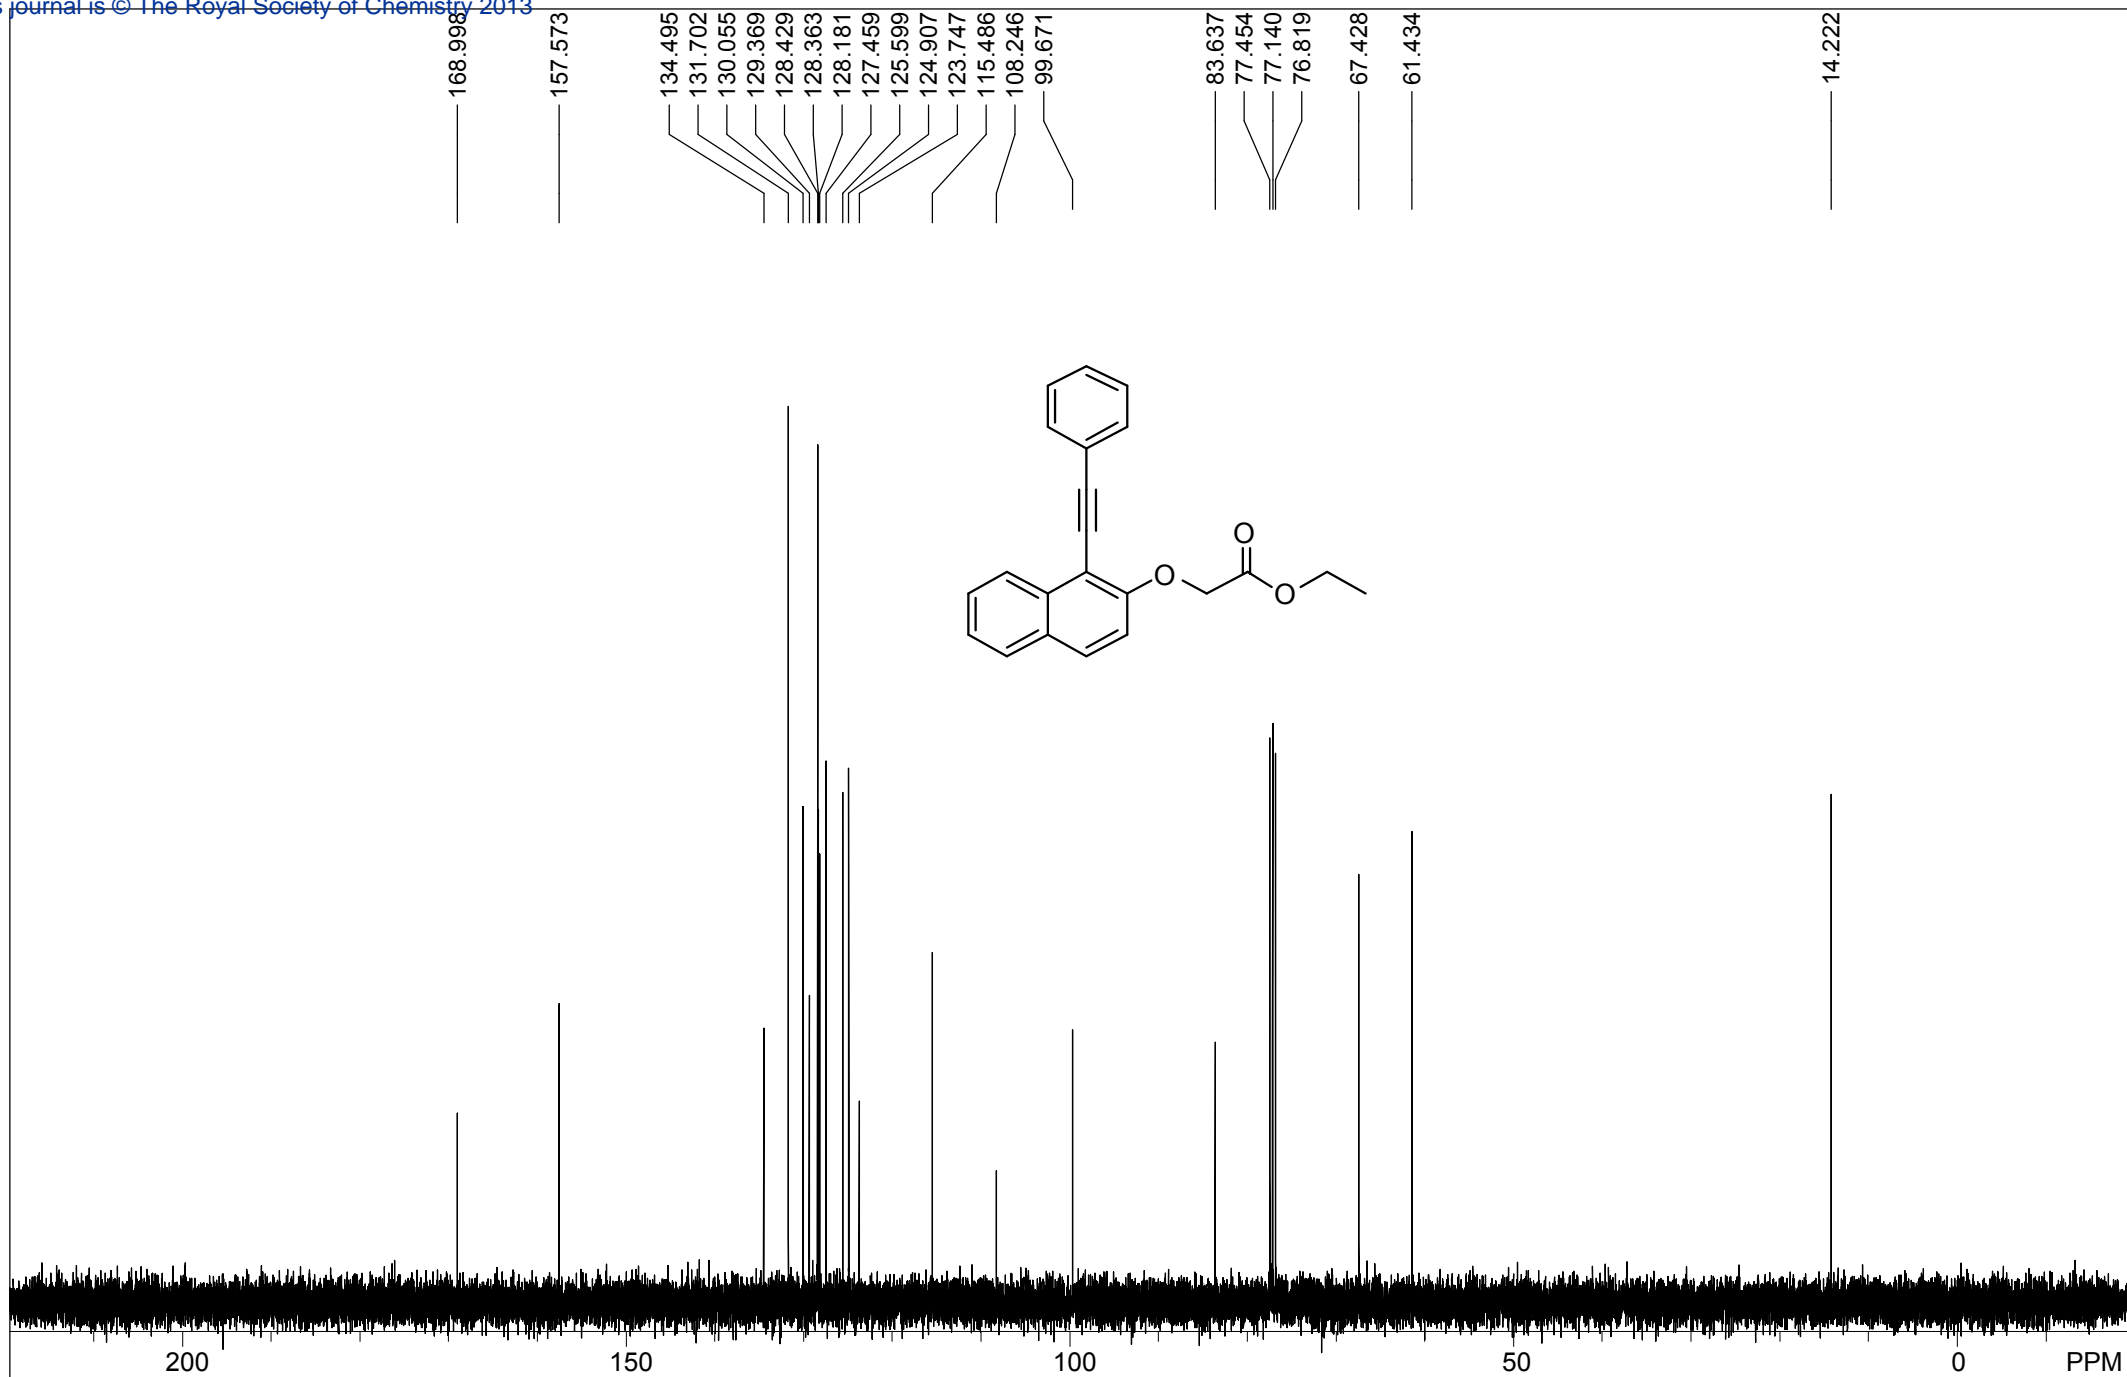

|                                                   |           |            |             |              |         |                       |
|---------------------------------------------------|-----------|------------|-------------|--------------|---------|-----------------------|
| USER: Administr -- DATE: Sun Apr 24 03:15:00 2011 |           |            |             |              |         |                       |
| F1: 100.623                                       | F2: 1.000 | SW1: 24038 |             | OF1: 10063.0 |         | PTS1d: 32768 , 32768  |
| EX: zgpg30                                        |           | PW: 9.5 us | PD: 2.0 sec | NA: 30       | LB: 0.0 | Nuts - \$GWQ-2037-C_2 |



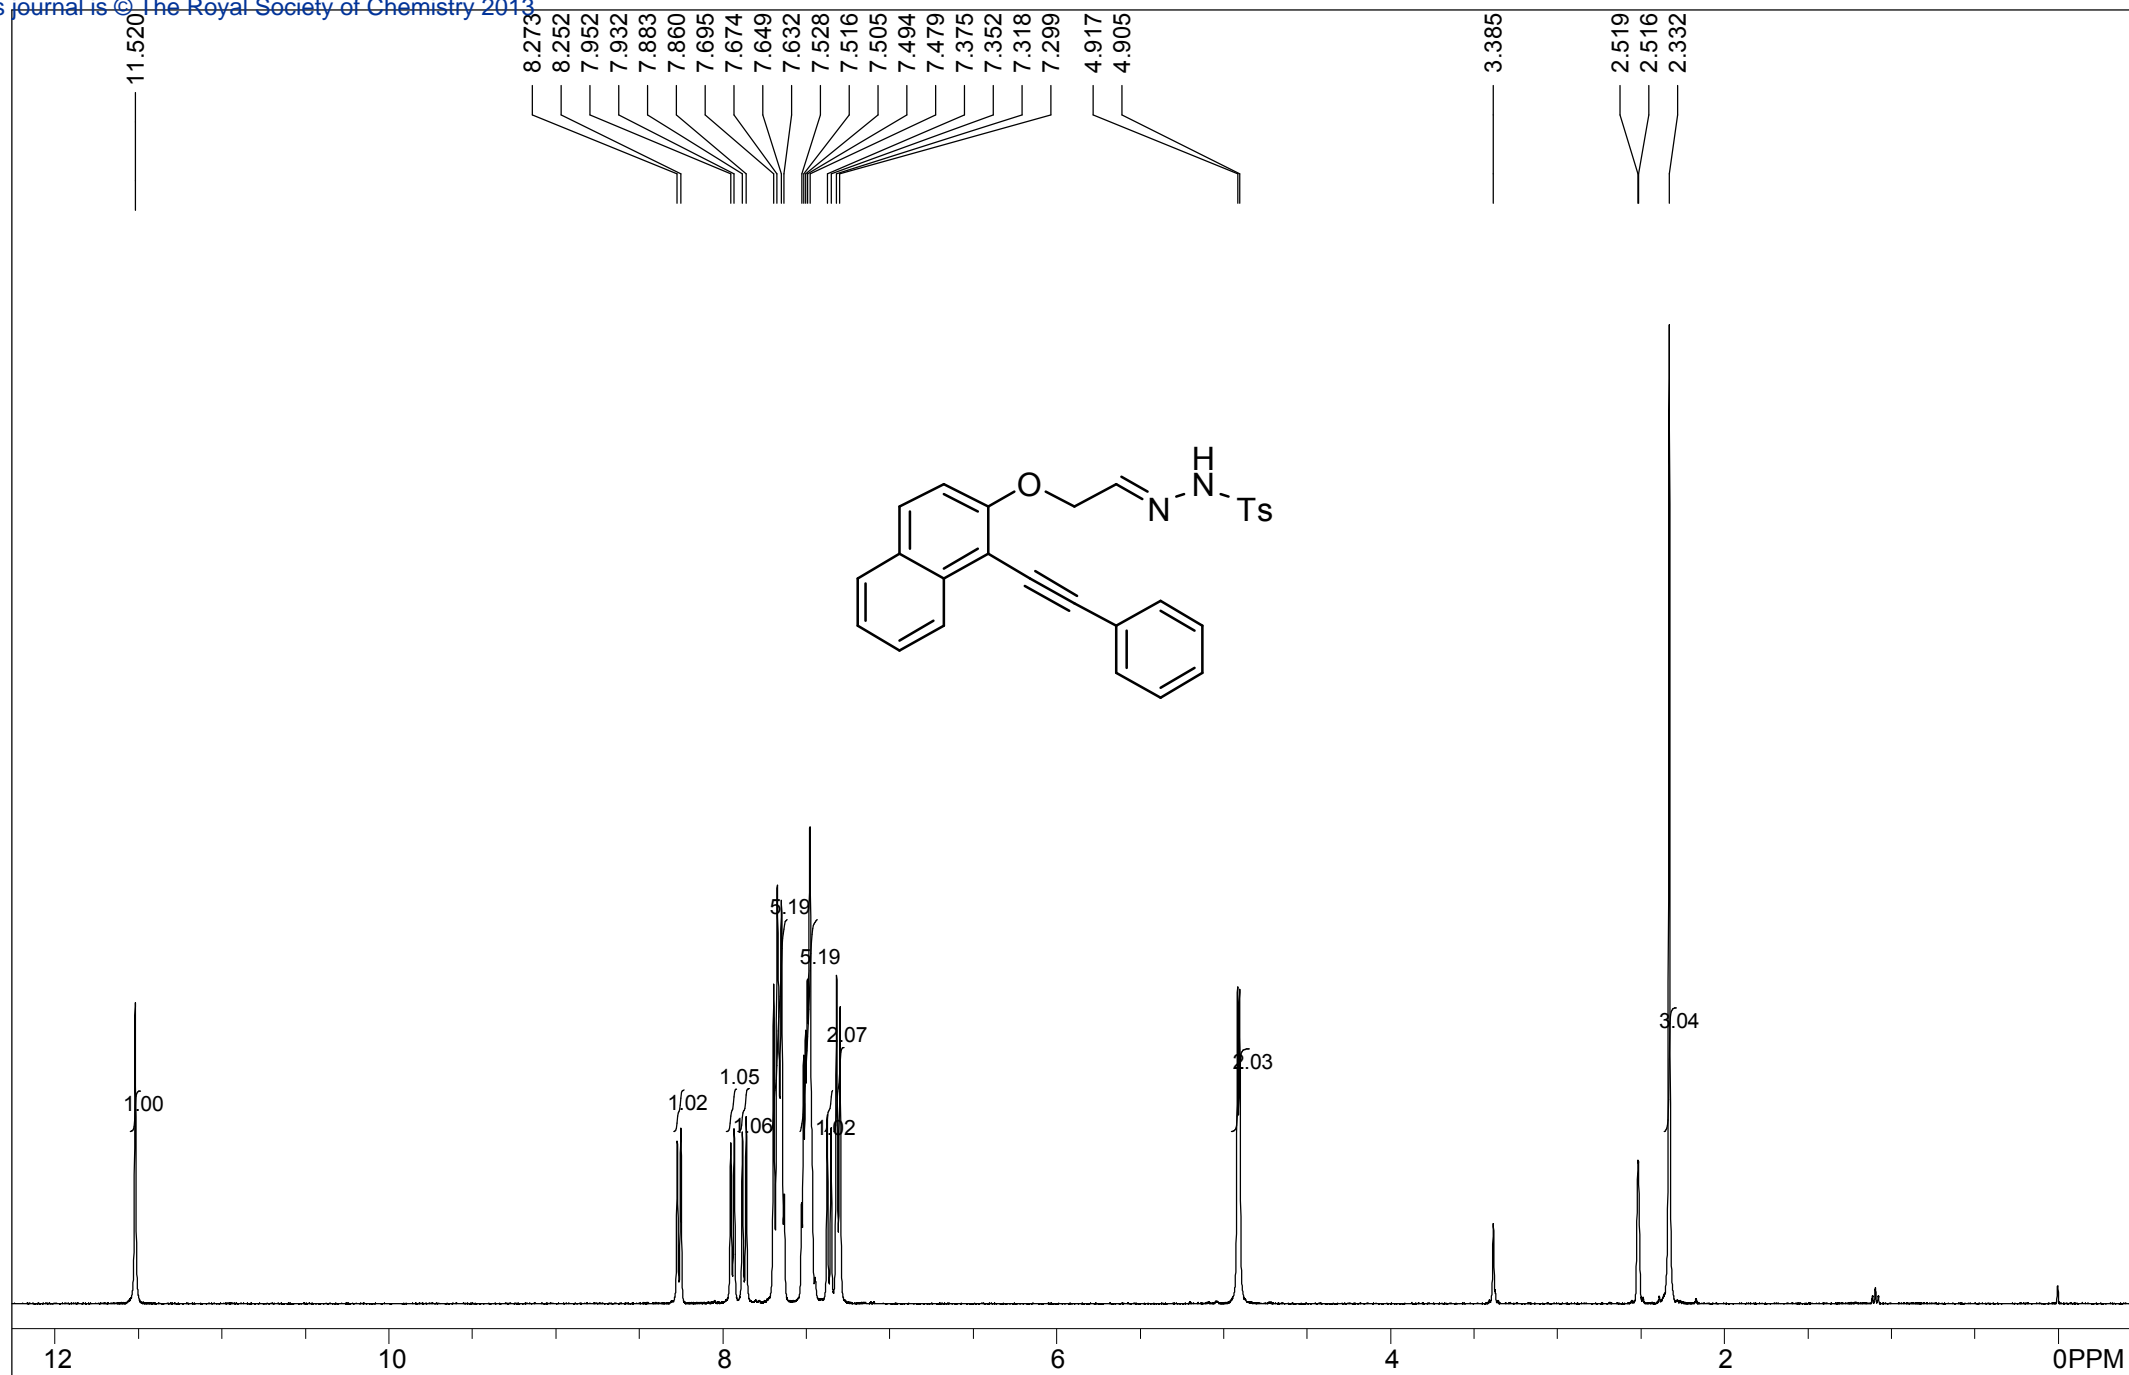

USER: Administr -- DATE: Mon May 02 22:56:03 2011

|             |             |             |             |                      |
|-------------|-------------|-------------|-------------|----------------------|
| F1: 400.132 | F2: 1.000   | SW1: 8224   | OF1: 2477.8 | PTS1d: 32768 , 32768 |
| EX: zg30    | PW: 13.6 us | PD: 1.0 sec | NA: 2       | LB: 0.0              |
|             |             |             |             | Nuts - \$GWQ-2039_2  |

157.908  
145.979  
143.850  
136.478  
133.992  
131.746  
130.864  
130.091  
129.259  
129.157  
128.807  
128.260  
127.539  
125.074  
125.008  
123.339  
115.238  
106.175  
99.167  
84.358  
68.470  
40.617  
40.405  
40.194  
39.990  
39.778  
39.574  
39.363  
21.440

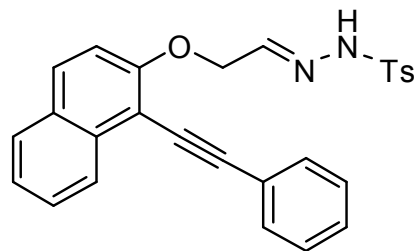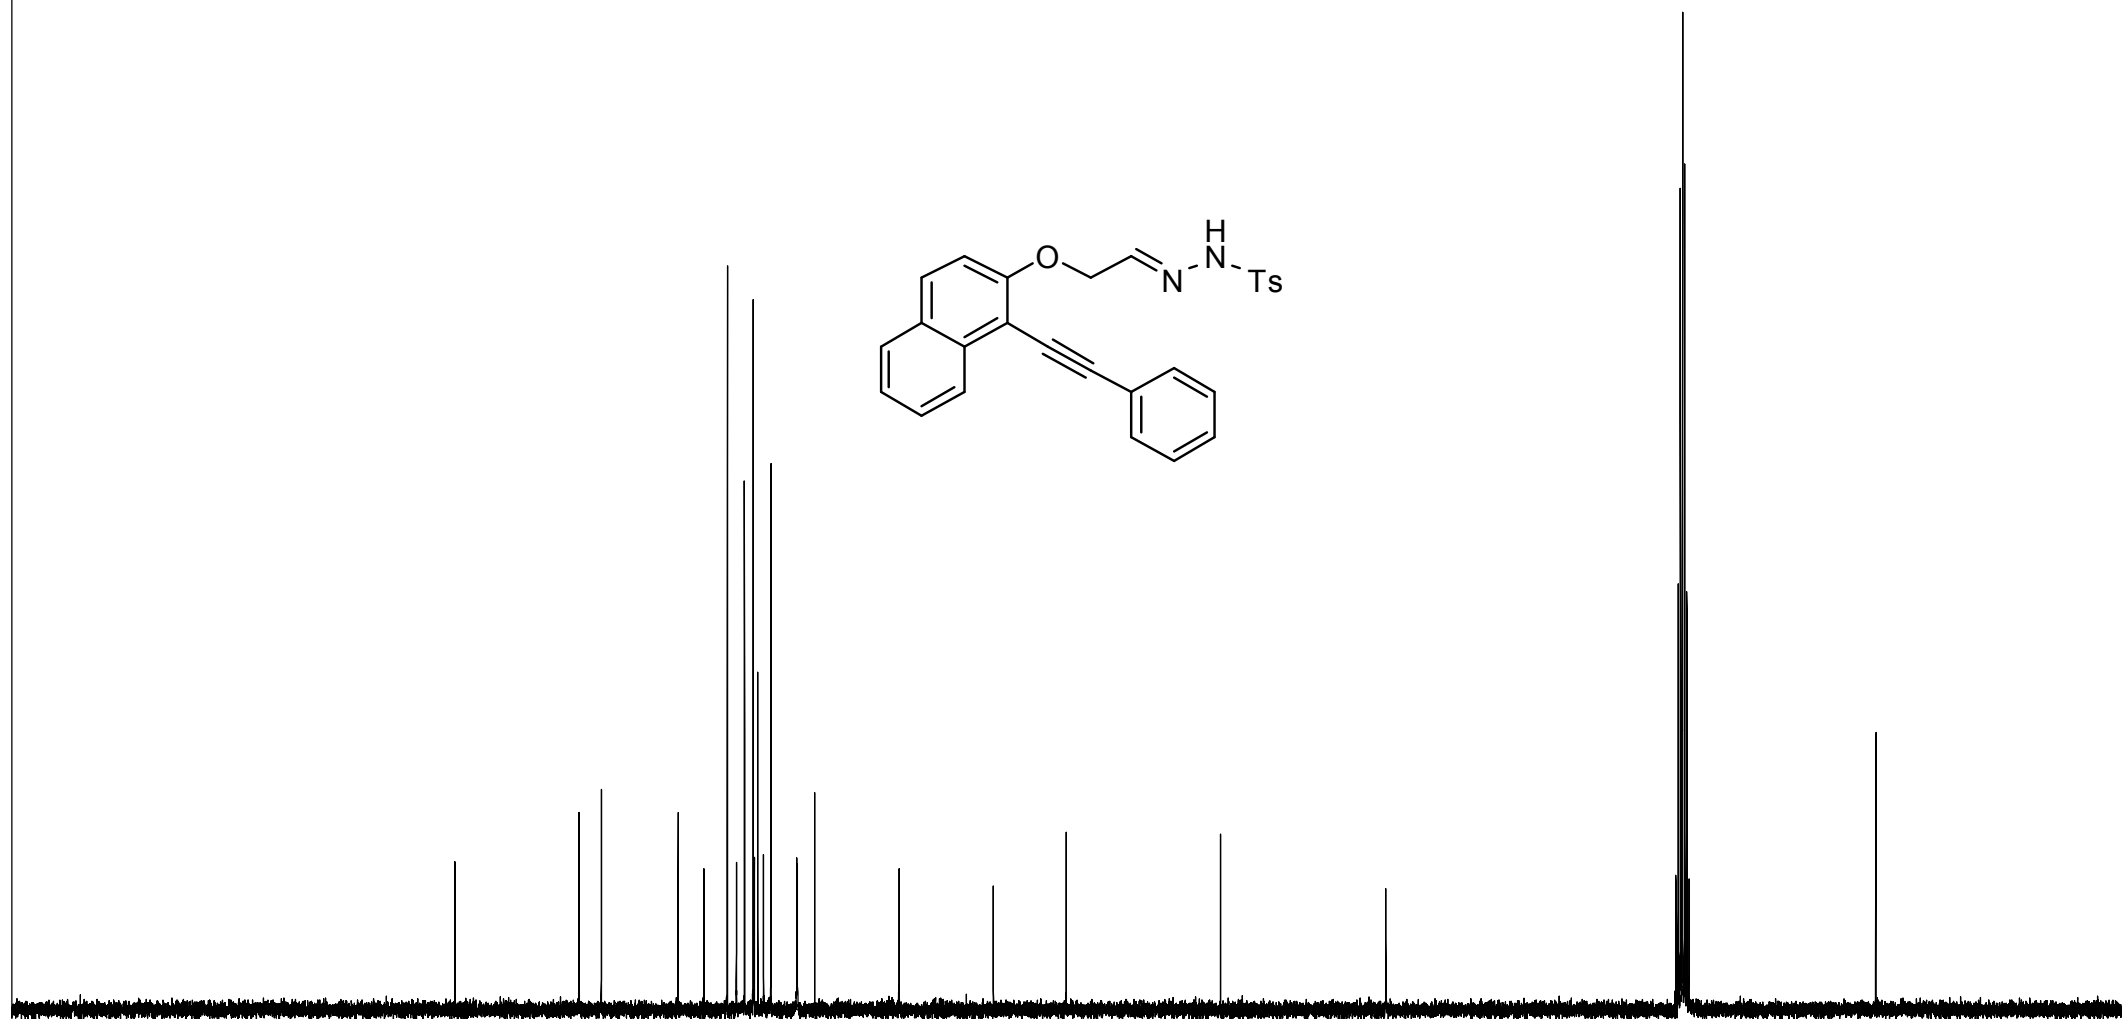

|             |  |            |  |             |  |              |  |                      |  |                                                   |  |
|-------------|--|------------|--|-------------|--|--------------|--|----------------------|--|---------------------------------------------------|--|
| F1: 100.623 |  | F2: 1.000  |  | SW1: 24038  |  | OF1: 10060.8 |  | PTS1d: 32768 , 32768 |  | USER: Administr -- DATE: Mon May 02 23:18:42 2011 |  |
| EX: zgpg30  |  | PW: 9.5 us |  | PD: 2.0 sec |  | NA: 350      |  | LB: 0.0              |  | Nuts - \$GWQ-2039-C_2                             |  |

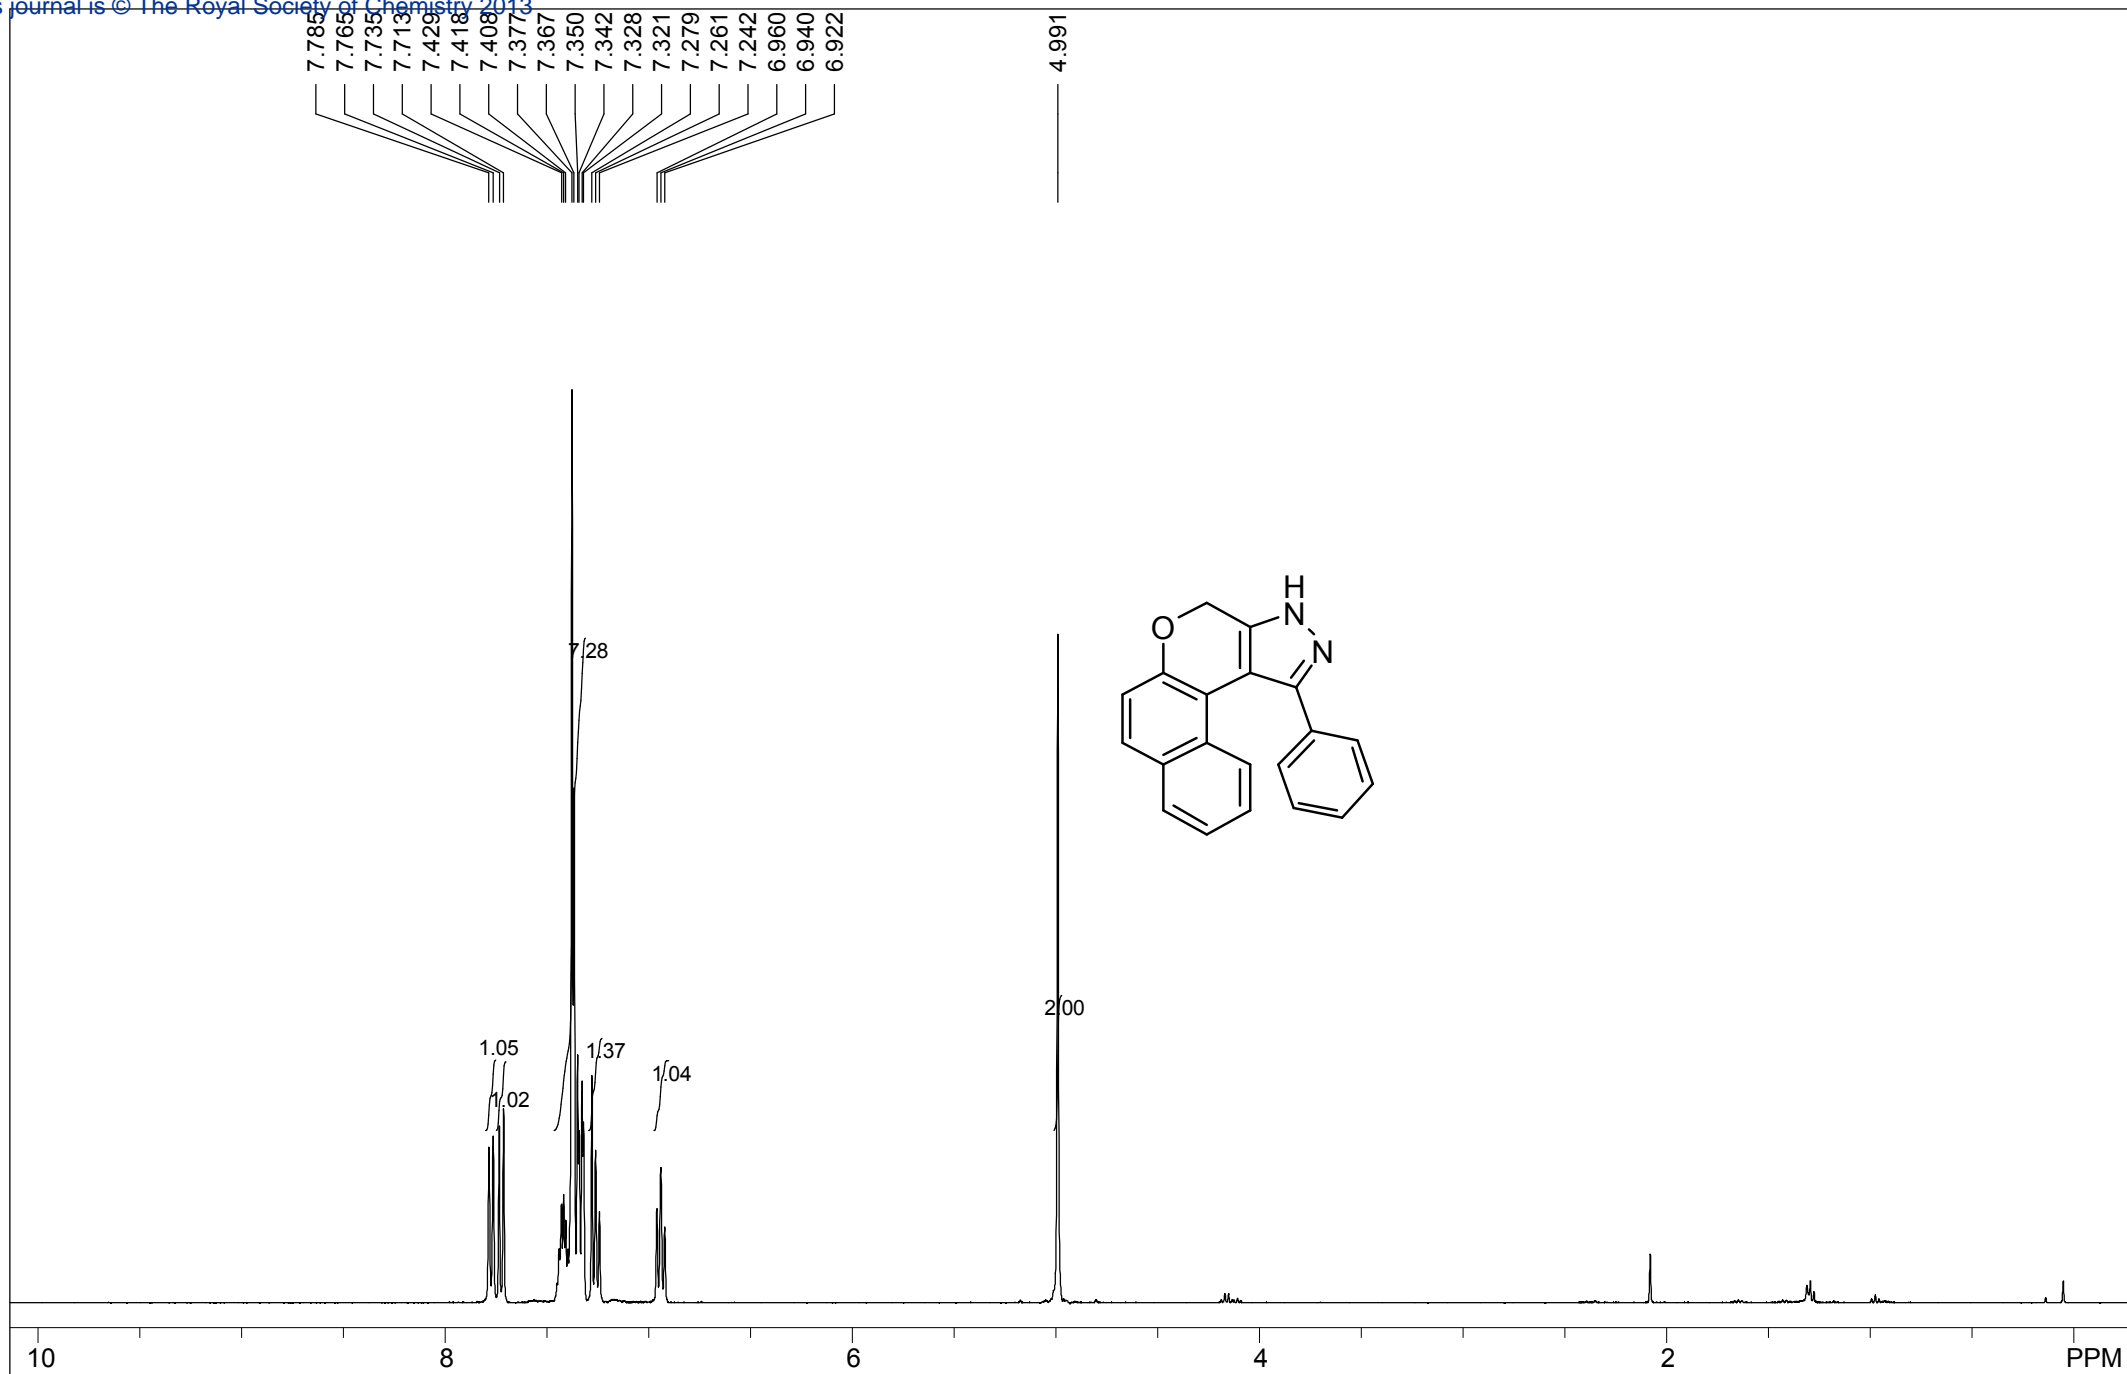

10 8 6 4 2 PPM

USER: Administr -- DATE: Sat Apr 30 12:07:35 2011

|             |             |             |             |                      |
|-------------|-------------|-------------|-------------|----------------------|
| F1: 400.132 | F2: 1.000   | SW1: 8224   | OF1: 2471.0 | PTS1d: 32768 , 32768 |
| EX: zg30    | PW: 13.6 us | PD: 1.0 sec | NA: 2       | LB: 0.0              |

Nuts - \$GWQ-2040\_3

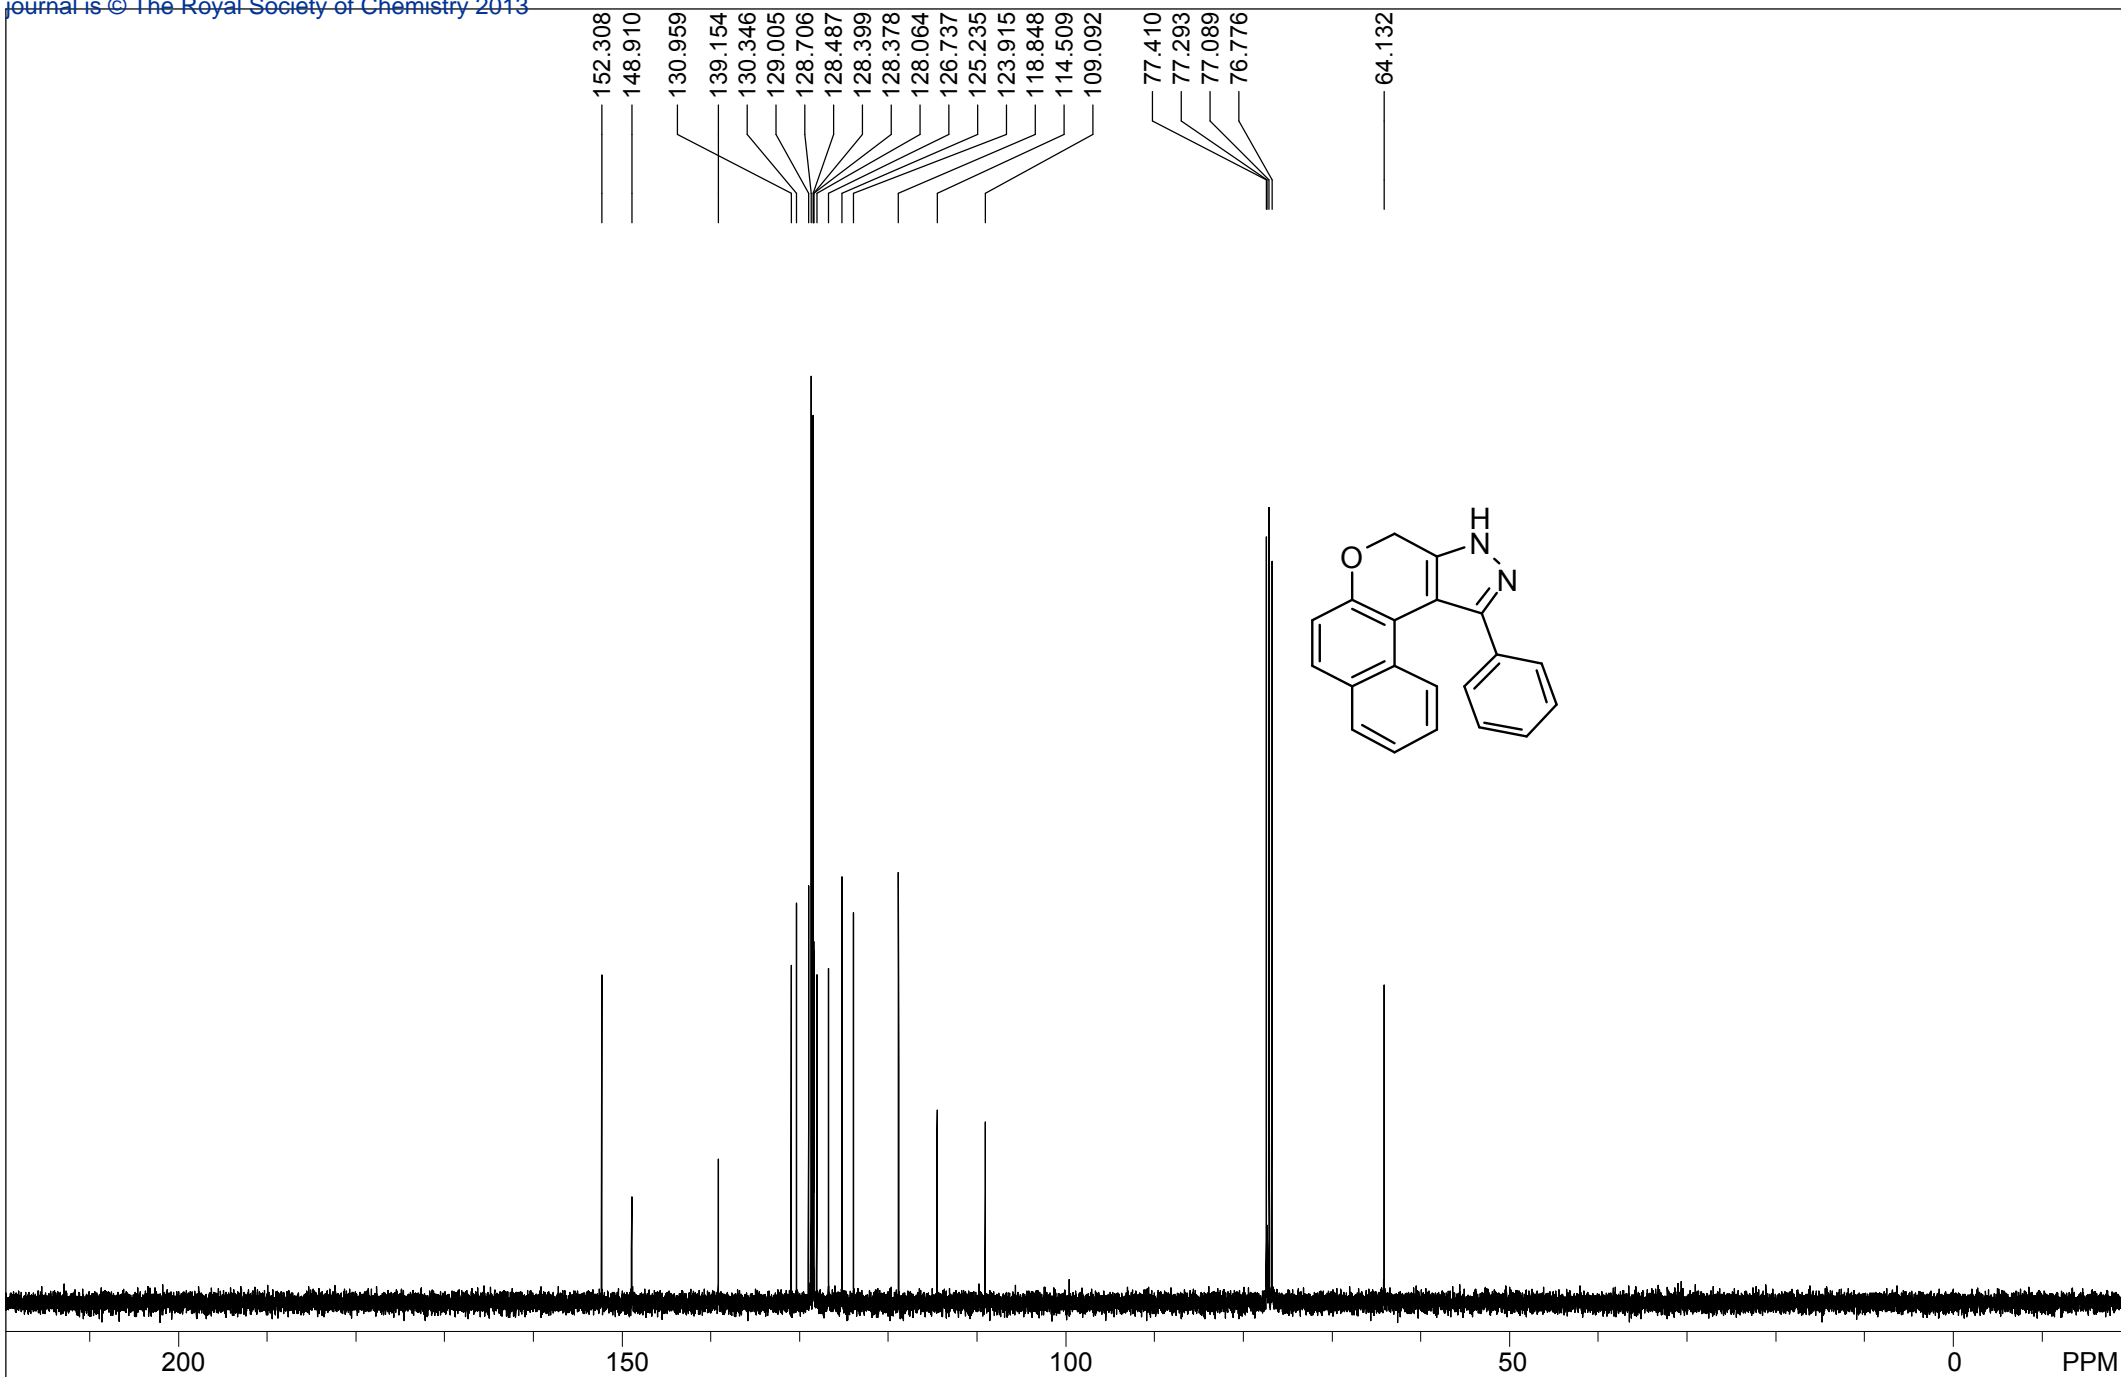

152.308  
148.910  
130.959  
139.154  
130.346  
129.005  
128.706  
128.487  
128.399  
128.378  
128.064  
126.737  
125.235  
123.915  
118.848  
114.509  
109.092  
77.410  
77.293  
77.089  
76.776  
64.132

200

150

100

50

0

PPM

USER: Administr -- DATE: Sat Apr 30 11:36:43 2011

|             |            |             |              |                       |
|-------------|------------|-------------|--------------|-----------------------|
| F1: 100.623 | F2: 1.000  | SW1: 24038  | OF1: 10063.0 | PTS1d: 32768 , 32768  |
| EX: zgpg30  | PW: 9.5 us | PD: 2.0 sec | NA: 300      | LB: 0.0               |
|             |            |             |              | Nuts - \$GWQ-2040-C_1 |

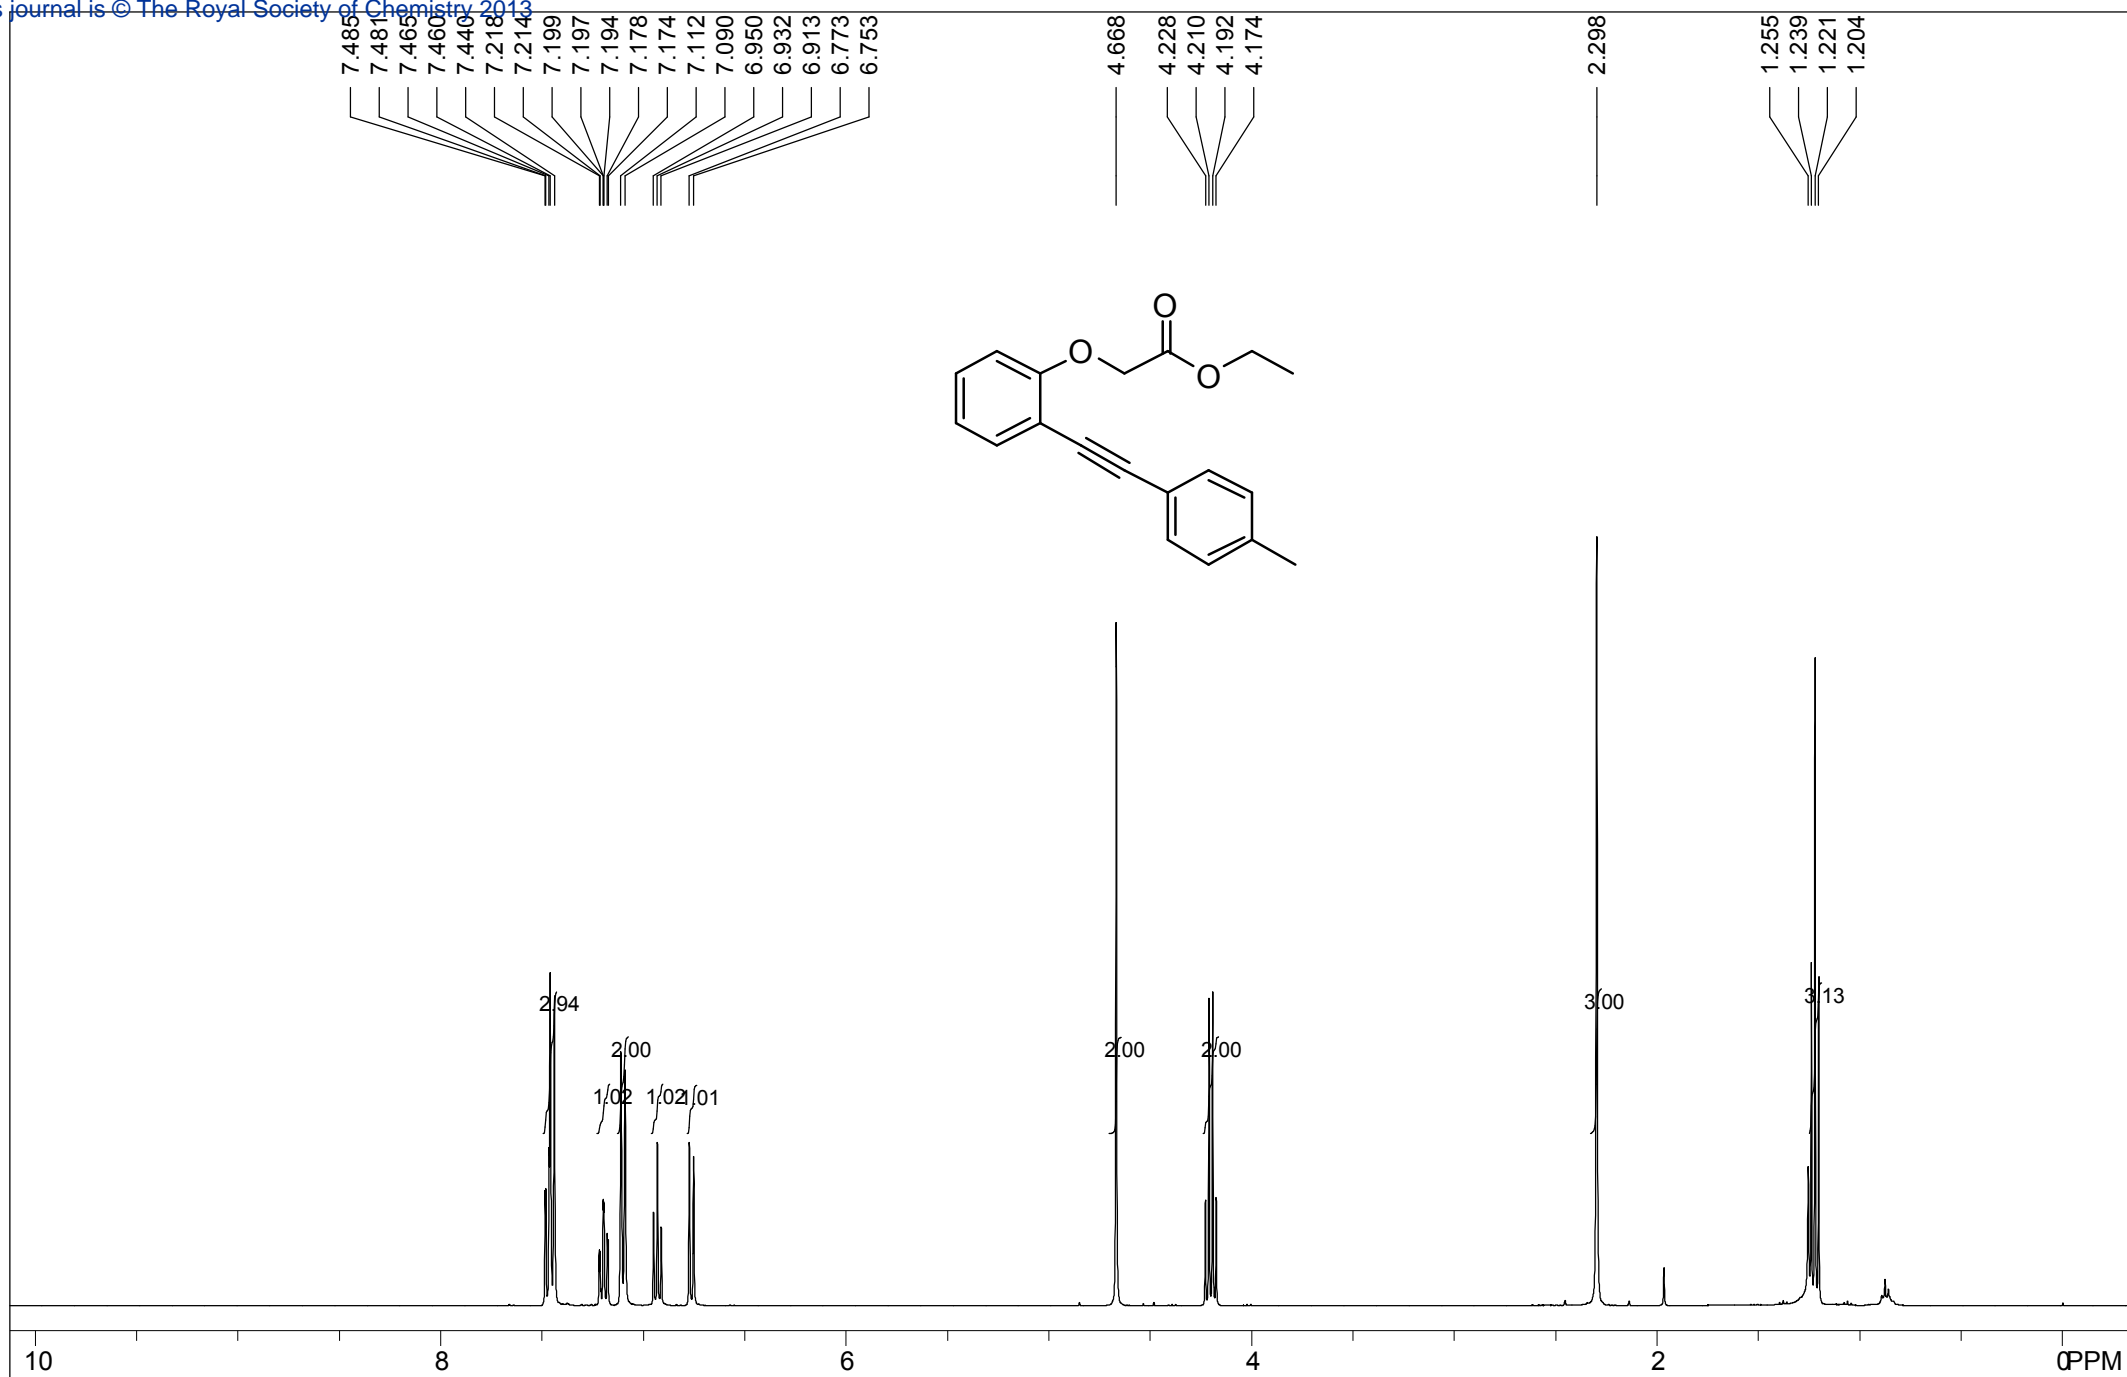

|                                                   |           |             |             |                                             |         |                      |  |
|---------------------------------------------------|-----------|-------------|-------------|---------------------------------------------|---------|----------------------|--|
| PROTON CDCl3 {D:\data\research\2011-6-23} nmr 47, |           |             |             | USER: nmr -- DATE: Thu Jun 23 15:56:26 2011 |         |                      |  |
| F1: 400.132                                       | F2: 1.000 | SW1: 8224   |             | OF1: 2441.6                                 |         | PTS1d: 32768 , 32768 |  |
| EX: zg30                                          |           | PW: 14.9 us | PD: 1.0 sec | NA: 16                                      | LB: 0.0 | Nuts - \$GWQ-2065_10 |  |

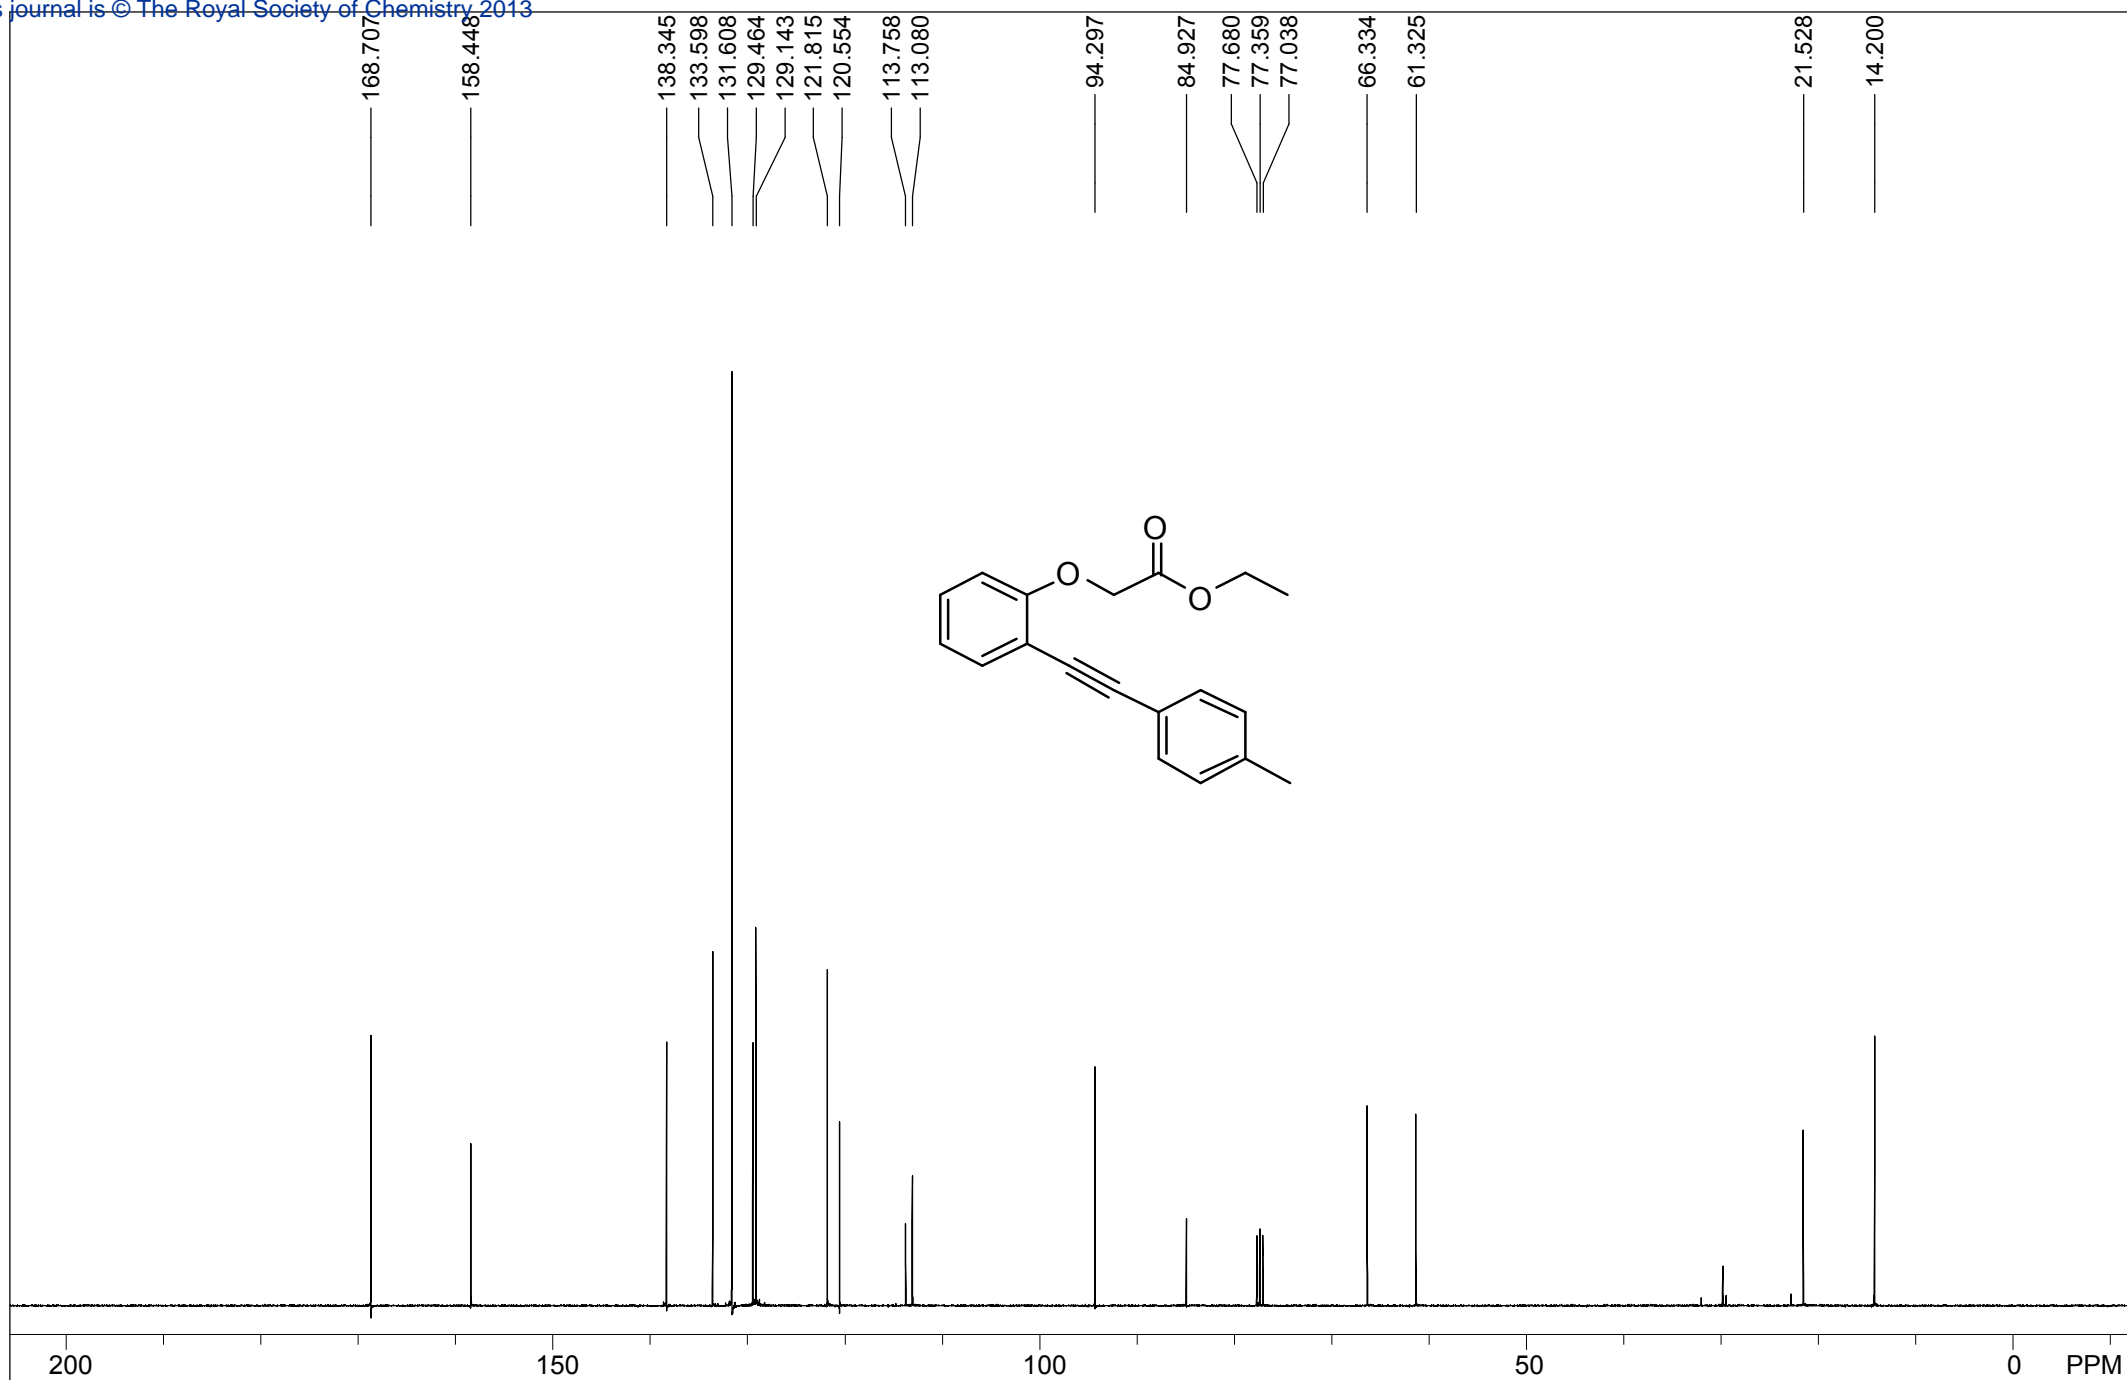

200 150 100 50 0 PPM

C13CPD CDCI3 {D:\data\research\2011-6-23} nmr 47, USER: nmr -- DATE: Thu Jun 23 16:26:48 2011

|             |            |             |              |                      |
|-------------|------------|-------------|--------------|----------------------|
| F1: 100.623 | F2: 1.000  | SW1: 24038  | OF1: 10063.0 | PTS1d: 32768 , 32768 |
| EX: zgpg30  | PW: 9.0 us | PD: 2.0 sec | NA: 500      | LB: 0.0              |

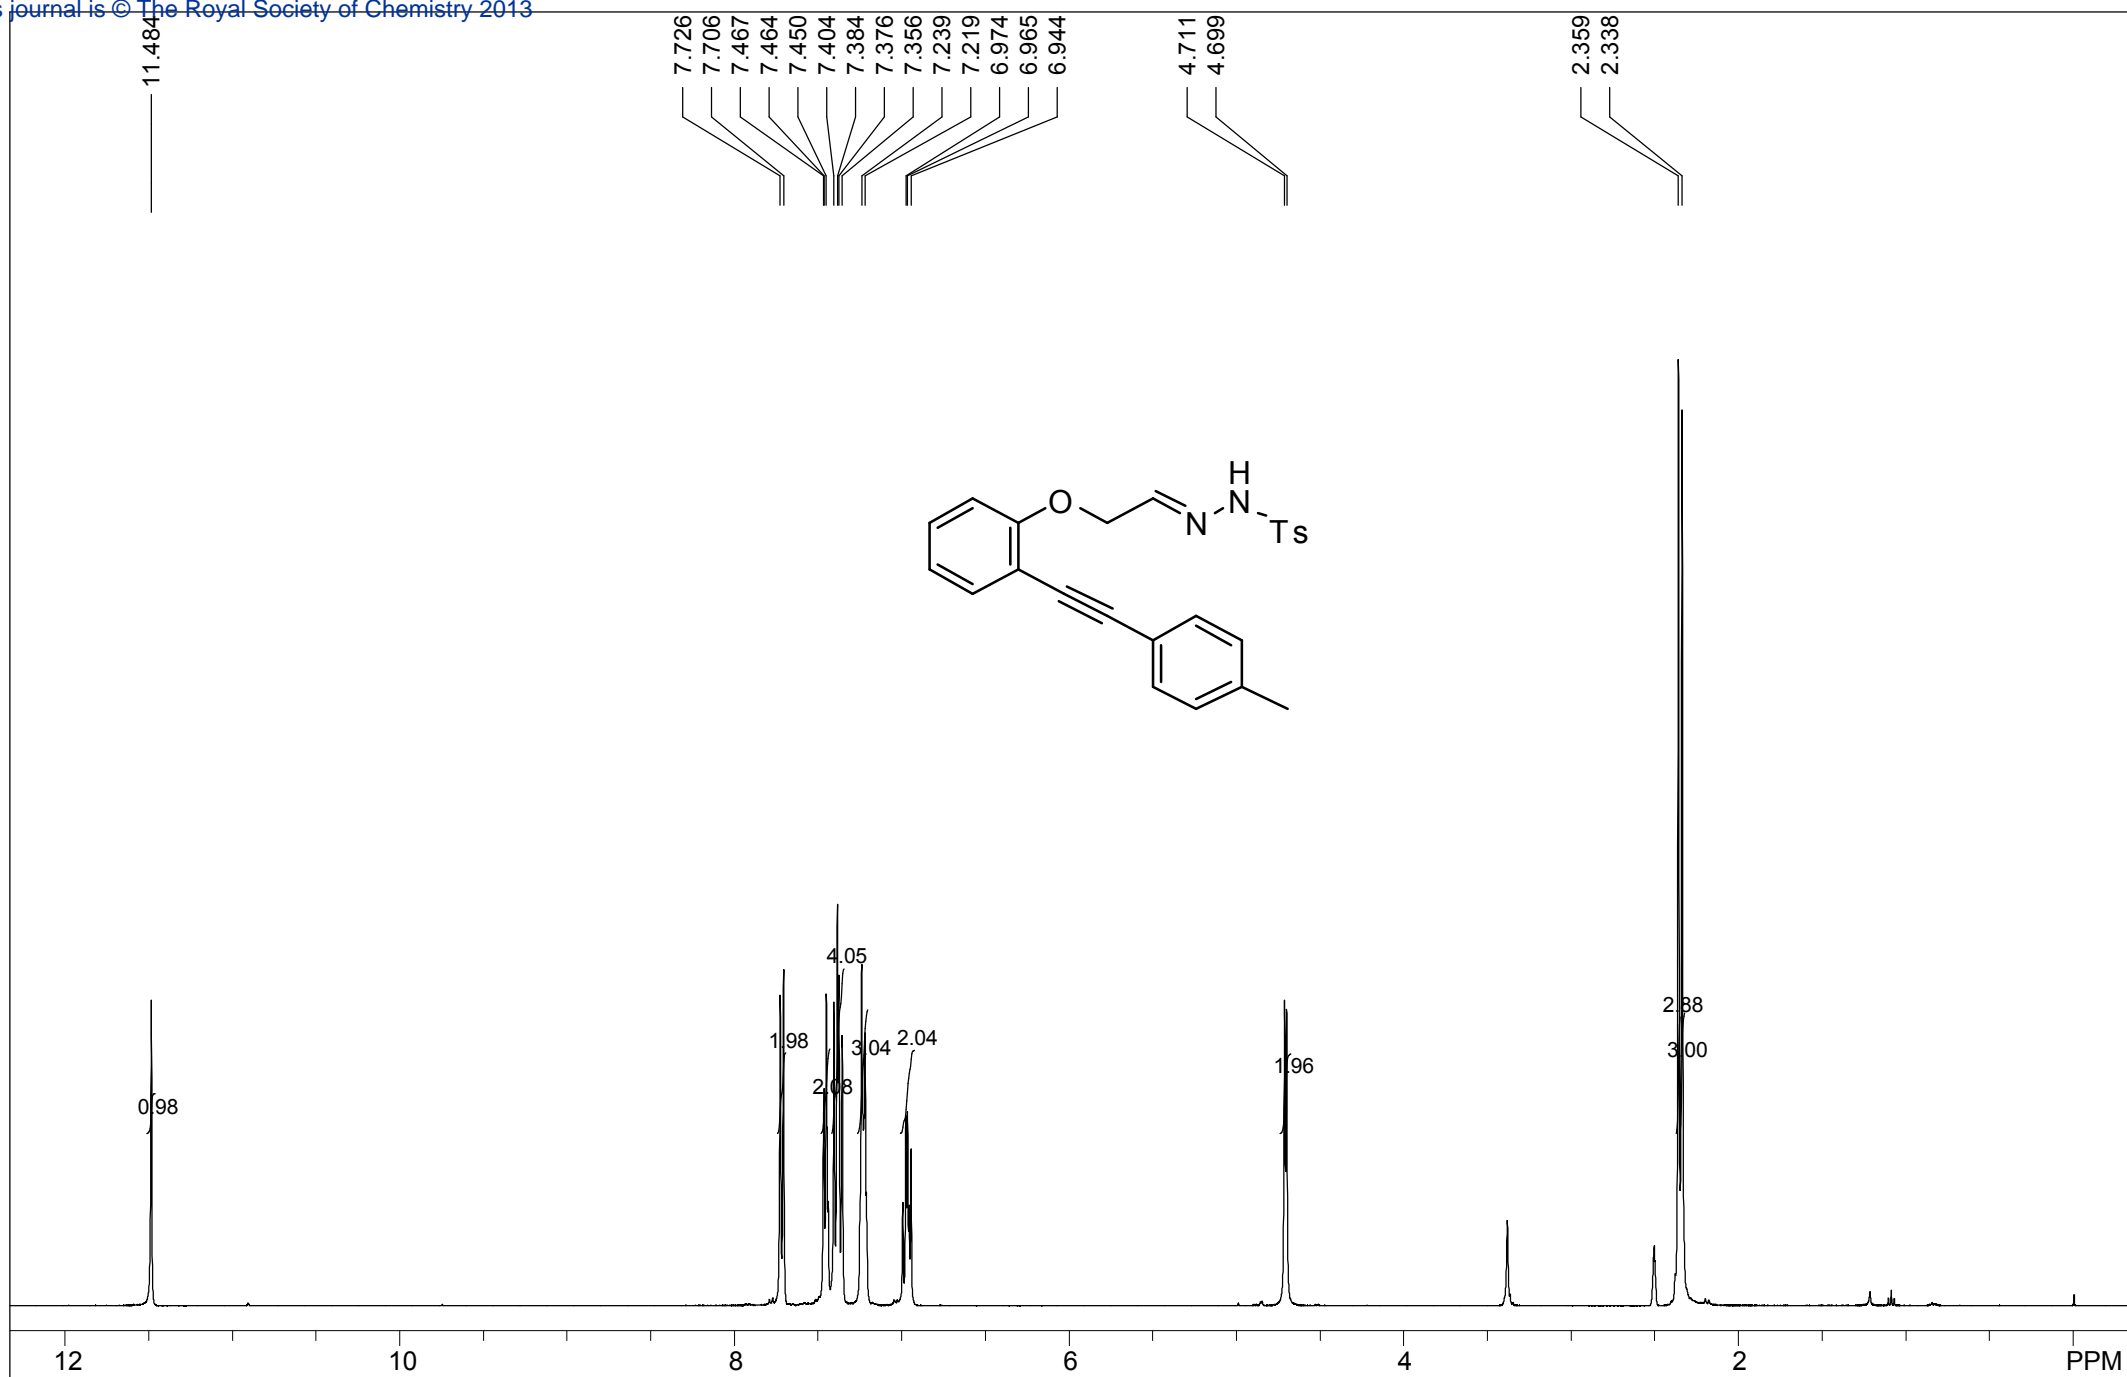

USER: Administr -- DATE: Thu Jun 30 22:37:04 2011

|             |           |             |             |             |         |                      |
|-------------|-----------|-------------|-------------|-------------|---------|----------------------|
| F1: 400.132 | F2: 1.000 | SW1: 8224   |             | OF1: 2469.5 |         | PTS1d: 32768 , 32768 |
| EX: zg30    |           | PW: 13.6 us | PD: 1.0 sec | NA: 2       | LB: 0.0 | Nuts - \$GWQ-2073_3  |

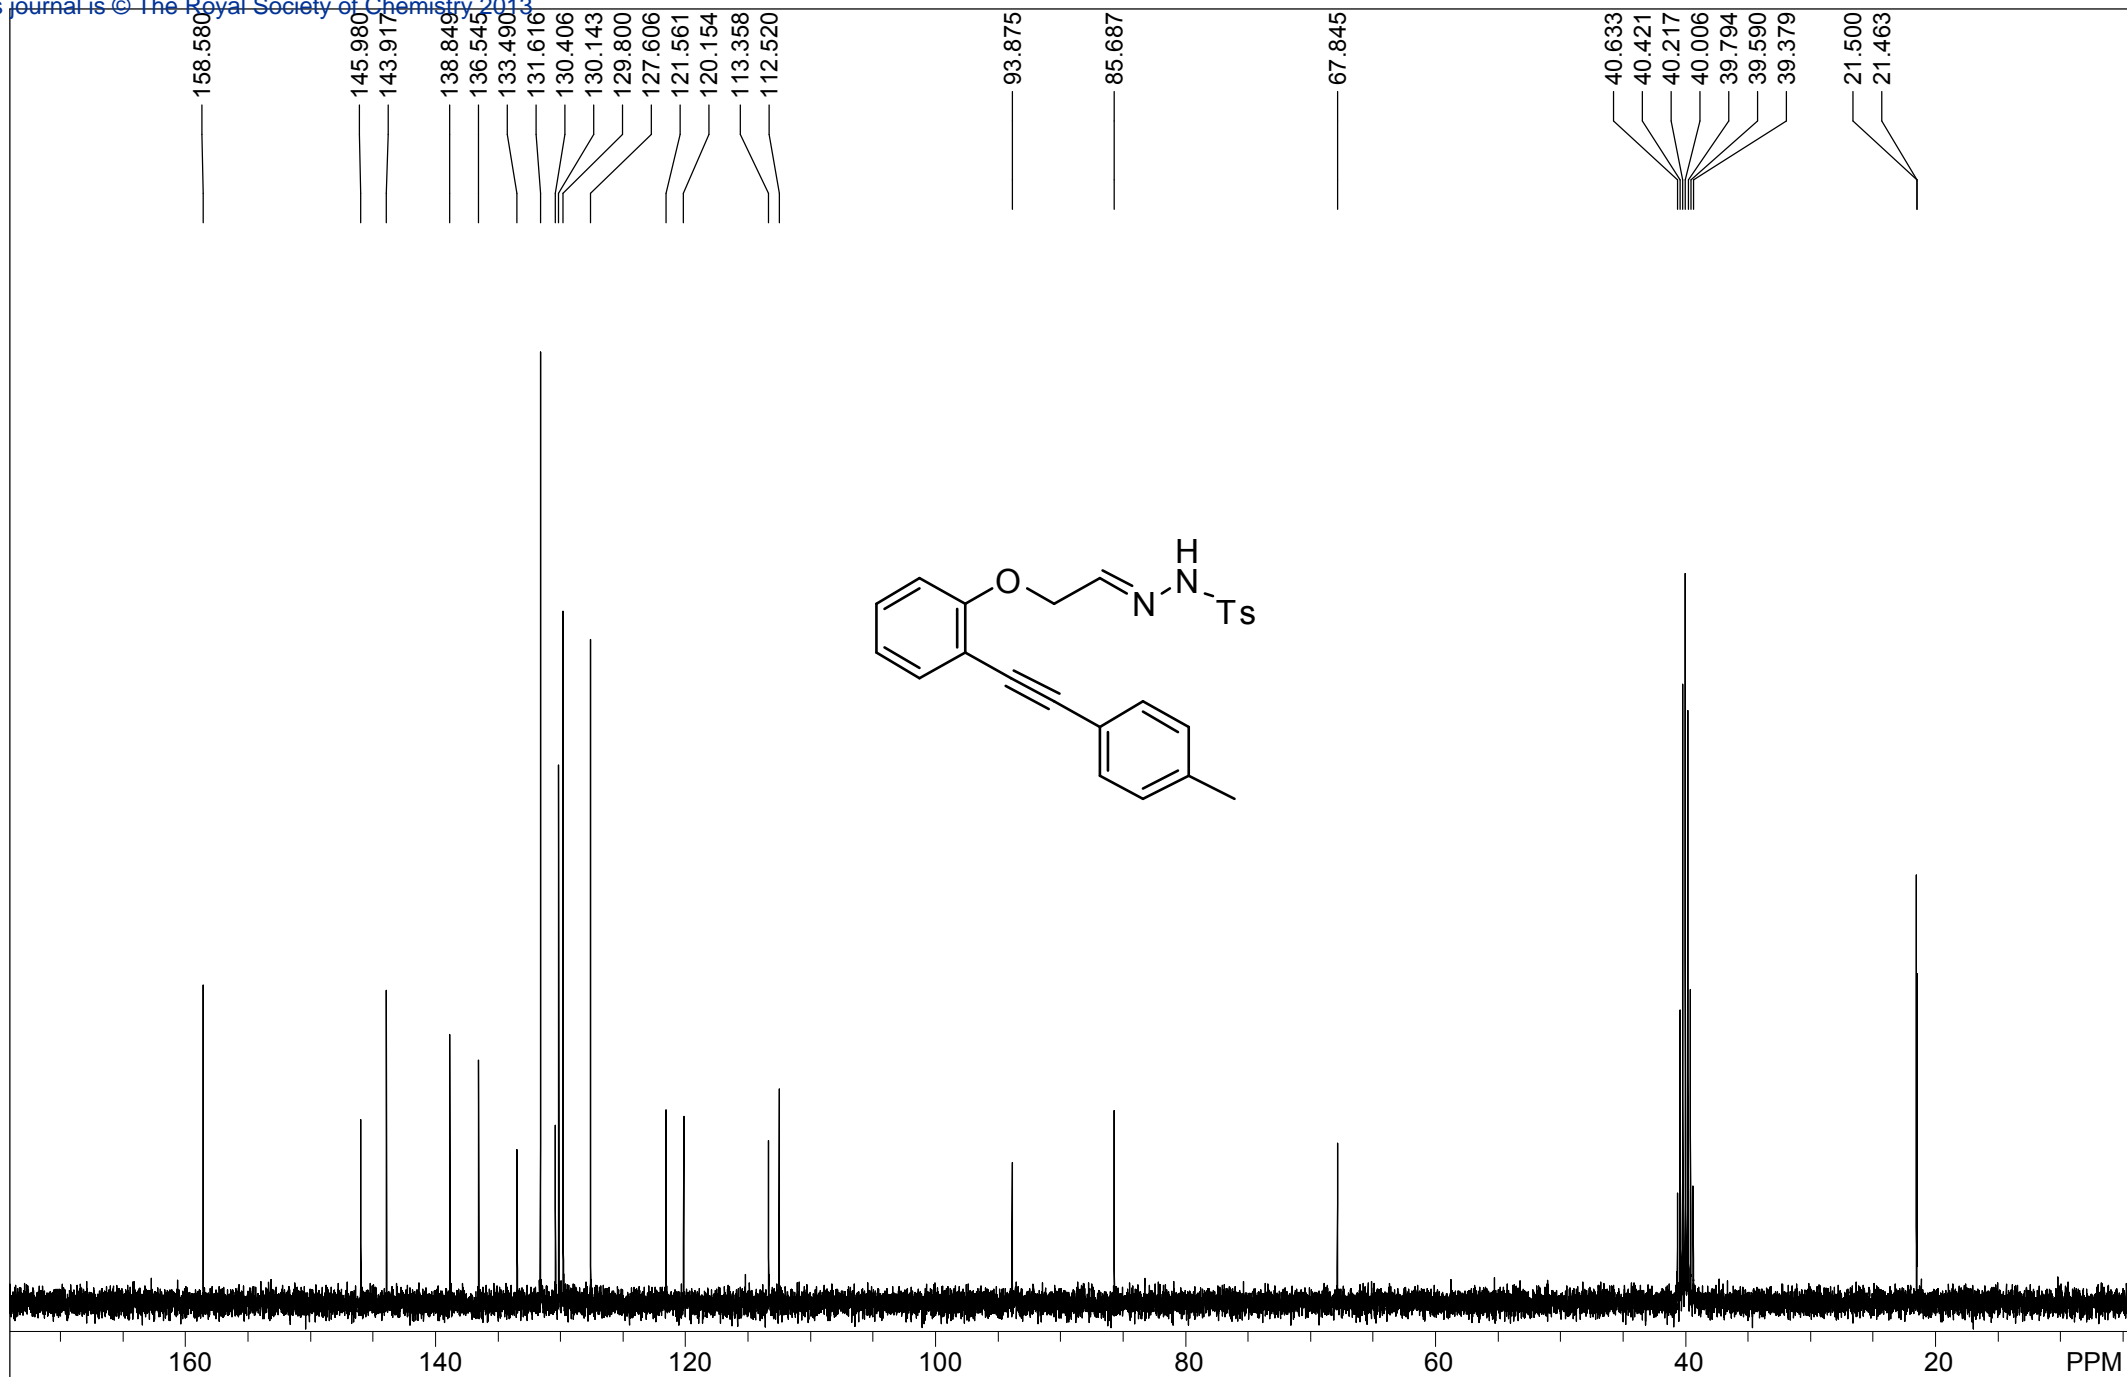

USER: Administr -- DATE: Thu Jun 30 22:42:32 2011

|             |           |            |             |              |         |                      |
|-------------|-----------|------------|-------------|--------------|---------|----------------------|
| F1: 100.623 | F2: 1.000 | SW1: 24038 |             | OF1: 10060.9 |         | PTS1d: 32768 , 32768 |
| EX: zgpg30  |           | PW: 9.5 us | PD: 2.0 sec | NA: 50       | LB: 0.0 | Nuts - \$GWQ-2073_4  |



7.538  
7.519  
7.403  
7.384  
7.343  
7.324  
7.144  
7.125  
7.106  
7.038  
7.018  
6.892  
6.874  
6.855

4.972

2.481

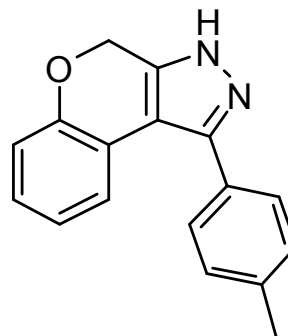

2.05  
1.98  
1.10  
1.04  
0.96  
0.98

2.01

3.00

10

8

6

4

2

PPM

USER: Administr -- DATE: Thu Jul 07 01:48:35 2011

F1: 400.132

F2: 1.000

SW1: 8224

OF1: 2471.0

PTS1d: 32768 , 32768

EX: zg30

PW: 13.6 us

PD: 1.0 sec

NA: 2

LB: 0.0

Nuts - \$GWQ-2081\_1

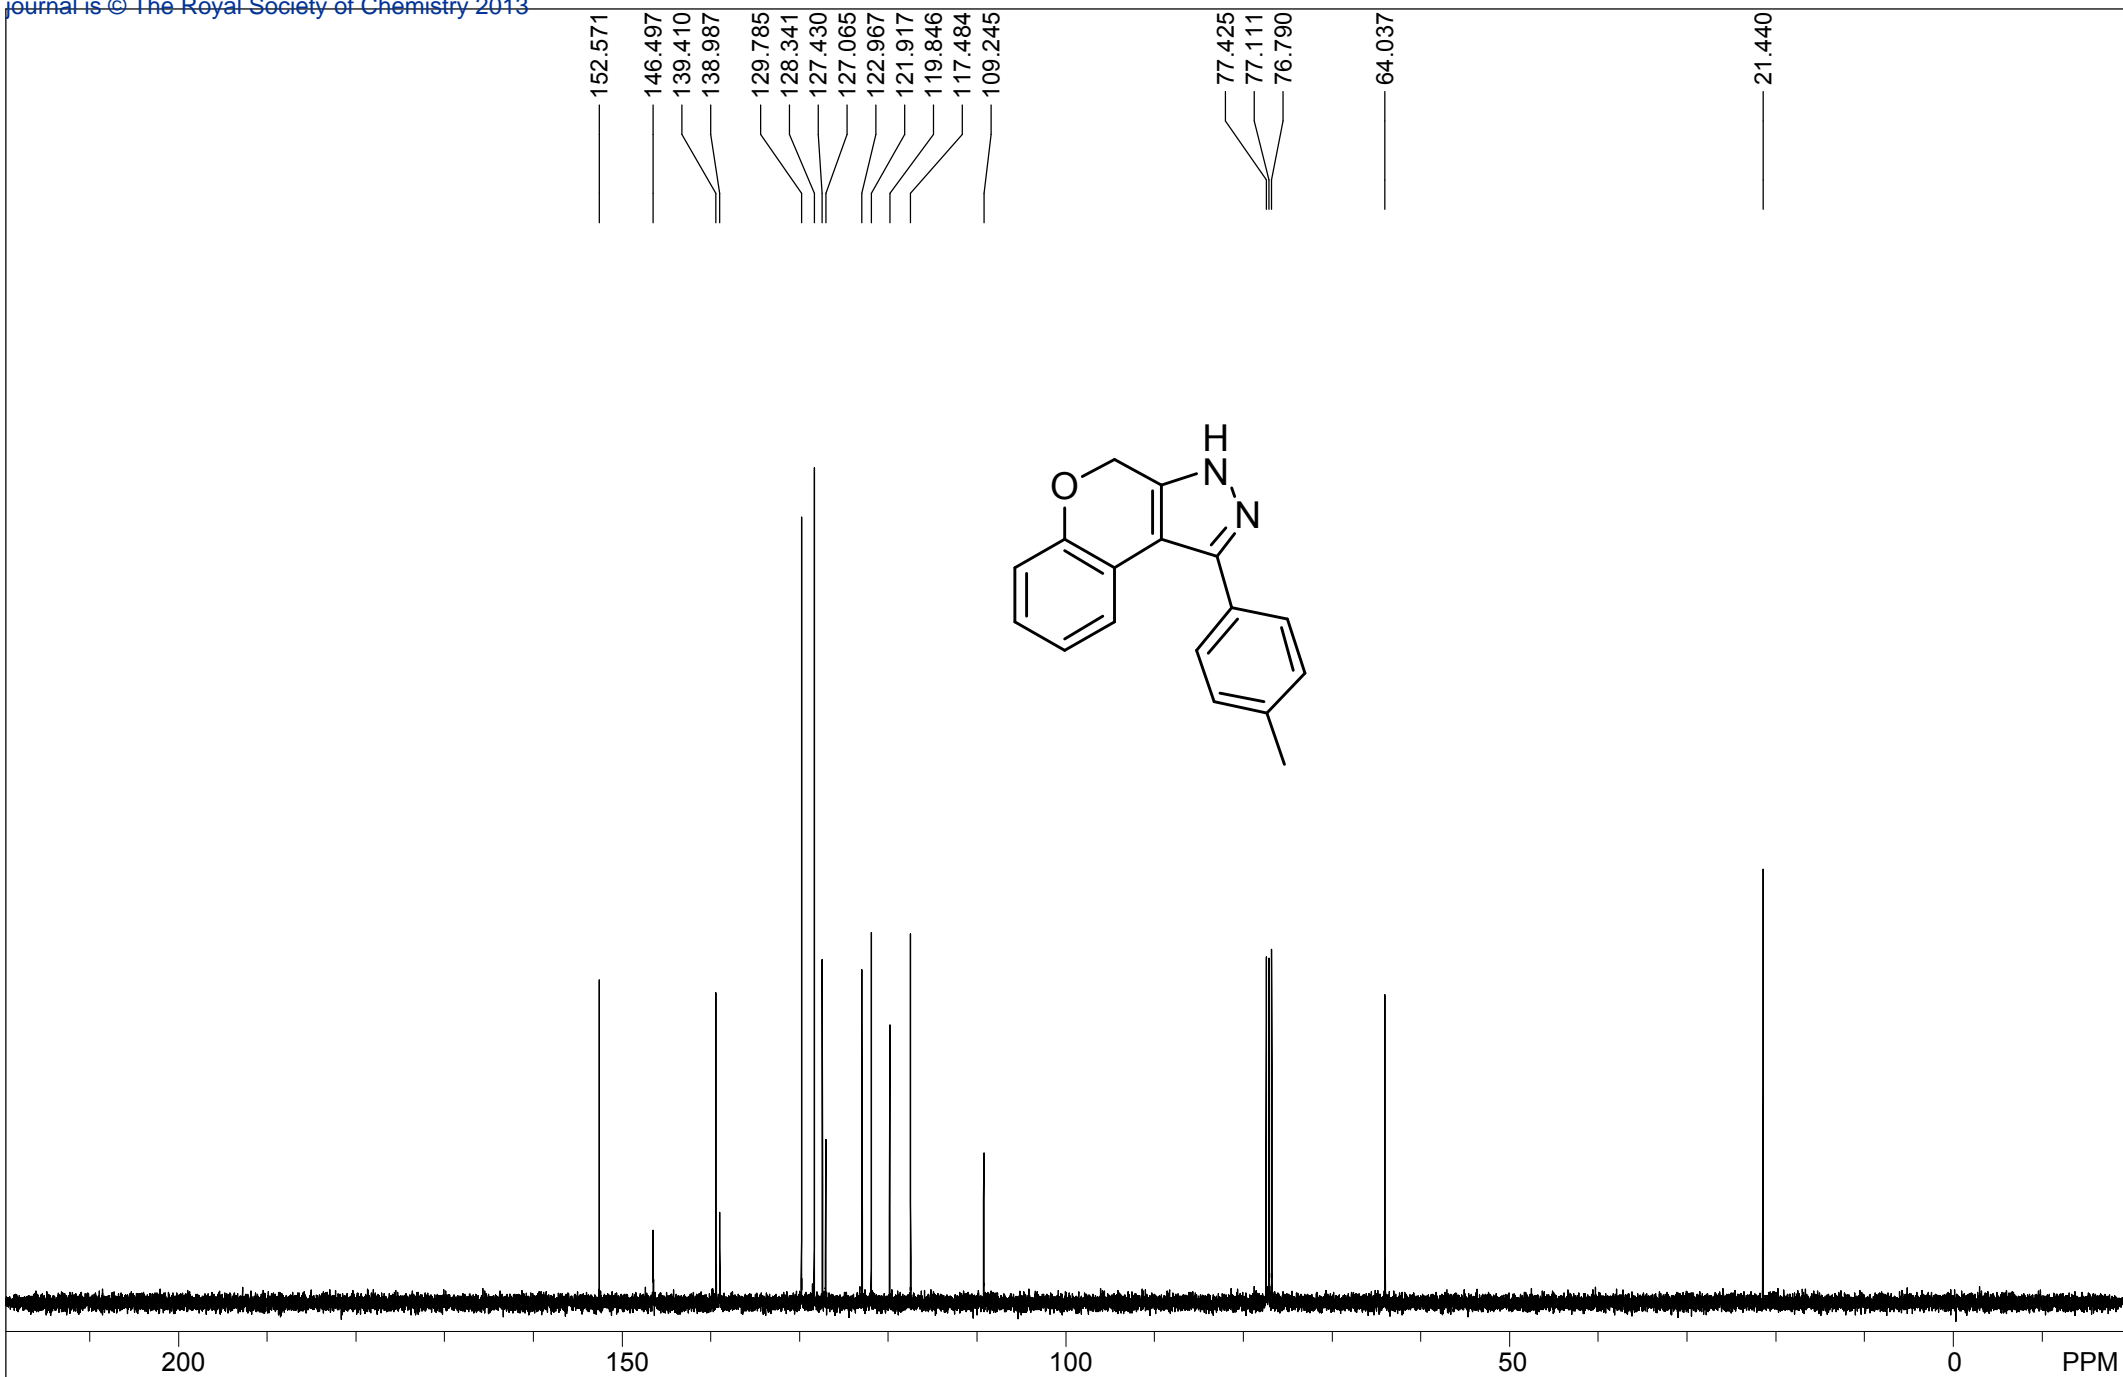

|                                                   |           |            |             |              |         |                      |
|---------------------------------------------------|-----------|------------|-------------|--------------|---------|----------------------|
| USER: Administr -- DATE: Thu Jul 07 01:57:05 2011 |           |            |             |              |         |                      |
| F1: 100.623                                       | F2: 1.000 | SW1: 24038 |             | OF1: 10063.0 |         | PTS1d: 32768 , 32768 |
| EX: zgpg30                                        |           | PW: 9.5 us | PD: 2.0 sec | NA: 151      | LB: 0.0 | Nuts - \$GWQ-2081_2  |

7.523  
7.517  
7.507  
7.500  
7.493  
7.488  
7.484  
7.253  
7.249  
7.234  
7.232  
7.231  
7.229  
7.214  
7.210  
6.990  
6.987  
6.971  
6.968  
6.952  
6.950  
6.872  
6.867  
6.855  
6.850  
6.817  
6.815  
6.796  
6.794  
4.717  
4.274  
4.256  
4.238  
4.220  
3.775

1.286  
1.275  
1.267  
1.250  
0.897

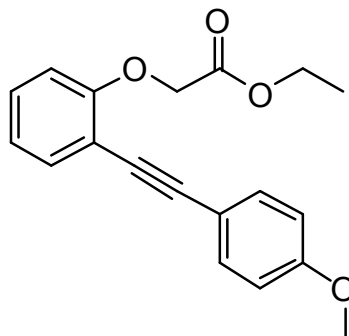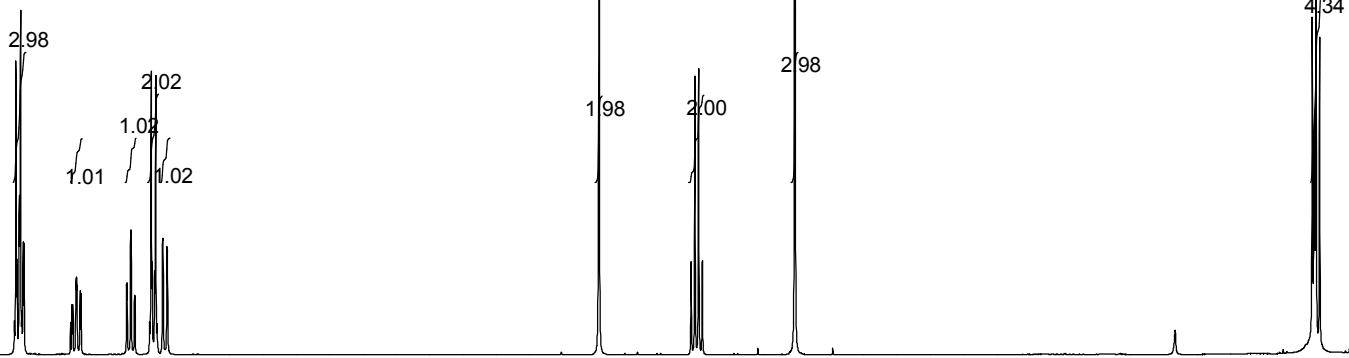

|                                                   |           |             |             |                                             |         |                      |  |
|---------------------------------------------------|-----------|-------------|-------------|---------------------------------------------|---------|----------------------|--|
| PROTON CDCl3 {D:\data\research\2011-6-22} nmr 28, |           |             |             | USER: nmr -- DATE: Wed Jun 22 21:11:10 2011 |         |                      |  |
| F1: 400.132                                       | F2: 1.000 | SW1: 8224   |             | OF1: 2462.1                                 |         | PTS1d: 32768 , 32768 |  |
| EX: zg30                                          |           | PW: 14.9 us | PD: 1.0 sec | NA: 16                                      | LB: 0.0 | Nuts - \$GWQ-2064_10 |  |

168.743  
159.658  
158.324  
133.482  
133.132  
129.260  
121.822  
115.661  
113.984  
113.889  
113.080  
94.107  
84.140  
77.570  
77.250  
76.929  
66.356  
61.332  
55.266  
14.185

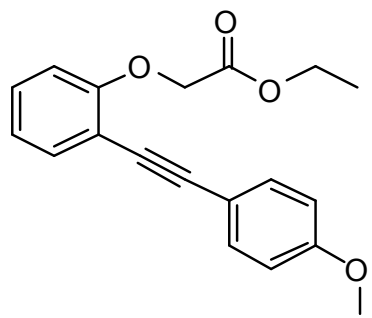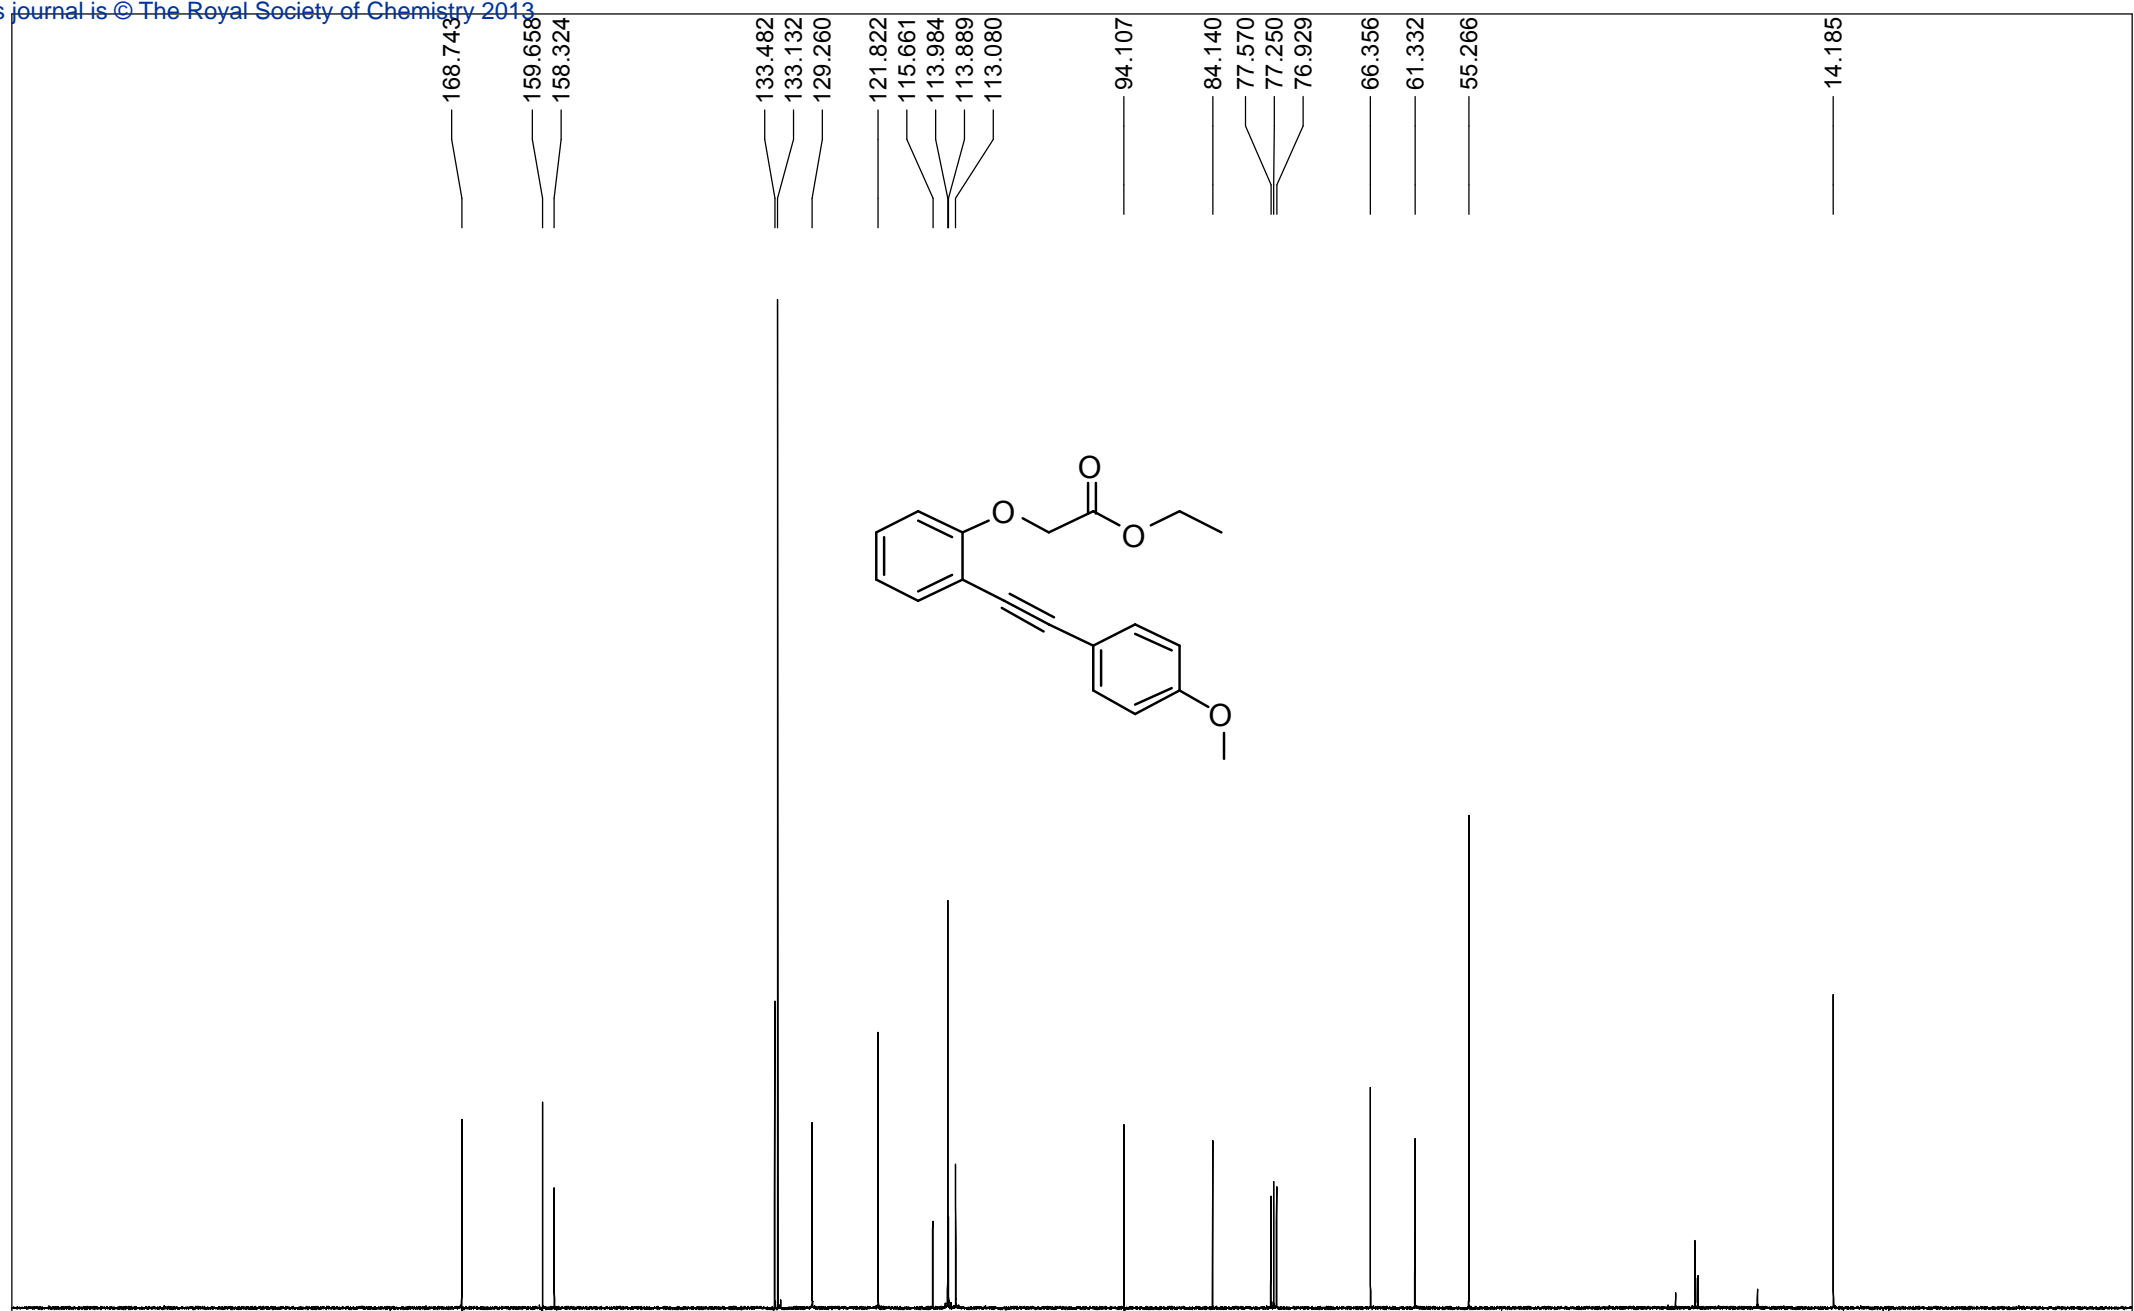

200

150

100

50

0

PPM

C13CPD CDCI3 {D:\data\research\2011-6-22} nmr 28. .

USER: nmr -- DATE: Wed Jun 22 21:35:04 2011

F1: 100.623

F2: 1.000

SW1: 24038

OF1: 10063.0

PTS1d: 32768 , 32768

EX: zgpg30

PW: 9.0 us

PD: 2.0 sec

NA: 400

LB: 0.0

Nuts - \$GWQ-2064\_11

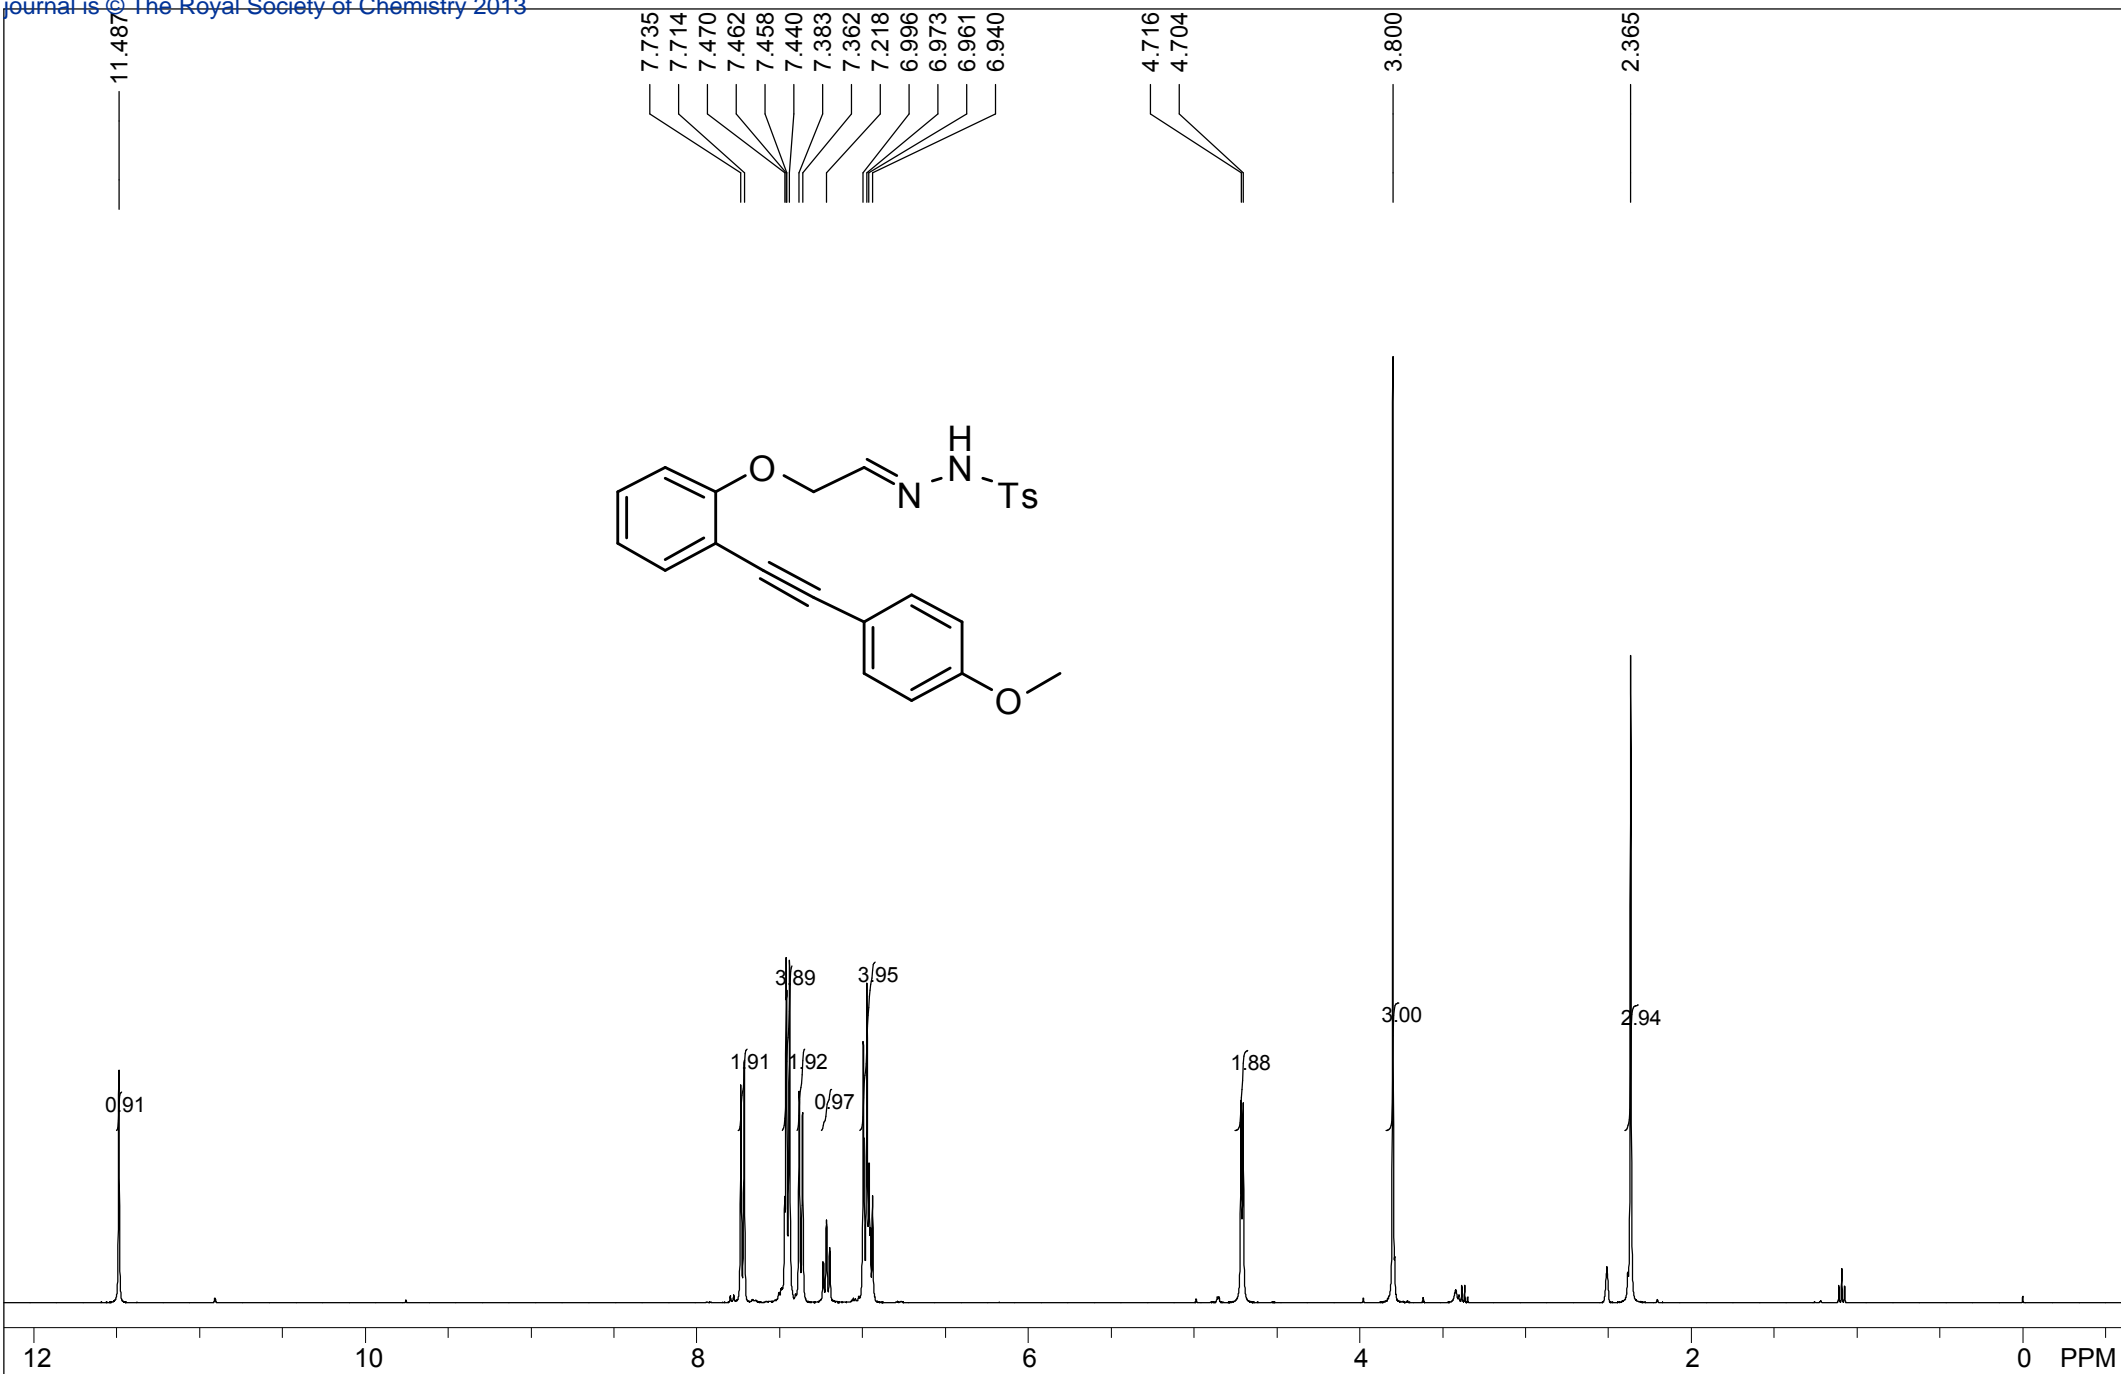

USER: Administr -- DATE: Thu Jun 30 22:23:53 2011

|             |           |             |             |             |         |                      |
|-------------|-----------|-------------|-------------|-------------|---------|----------------------|
| F1: 400.132 | F2: 1.000 | SW1: 8224   |             | OF1: 2471.0 |         | PTS1d: 32768 , 32768 |
| EX: zg30    |           | PW: 13.6 us | PD: 1.0 sec | NA: 2       | LB: 0.0 | Nuts - \$GWQ-2072_1  |

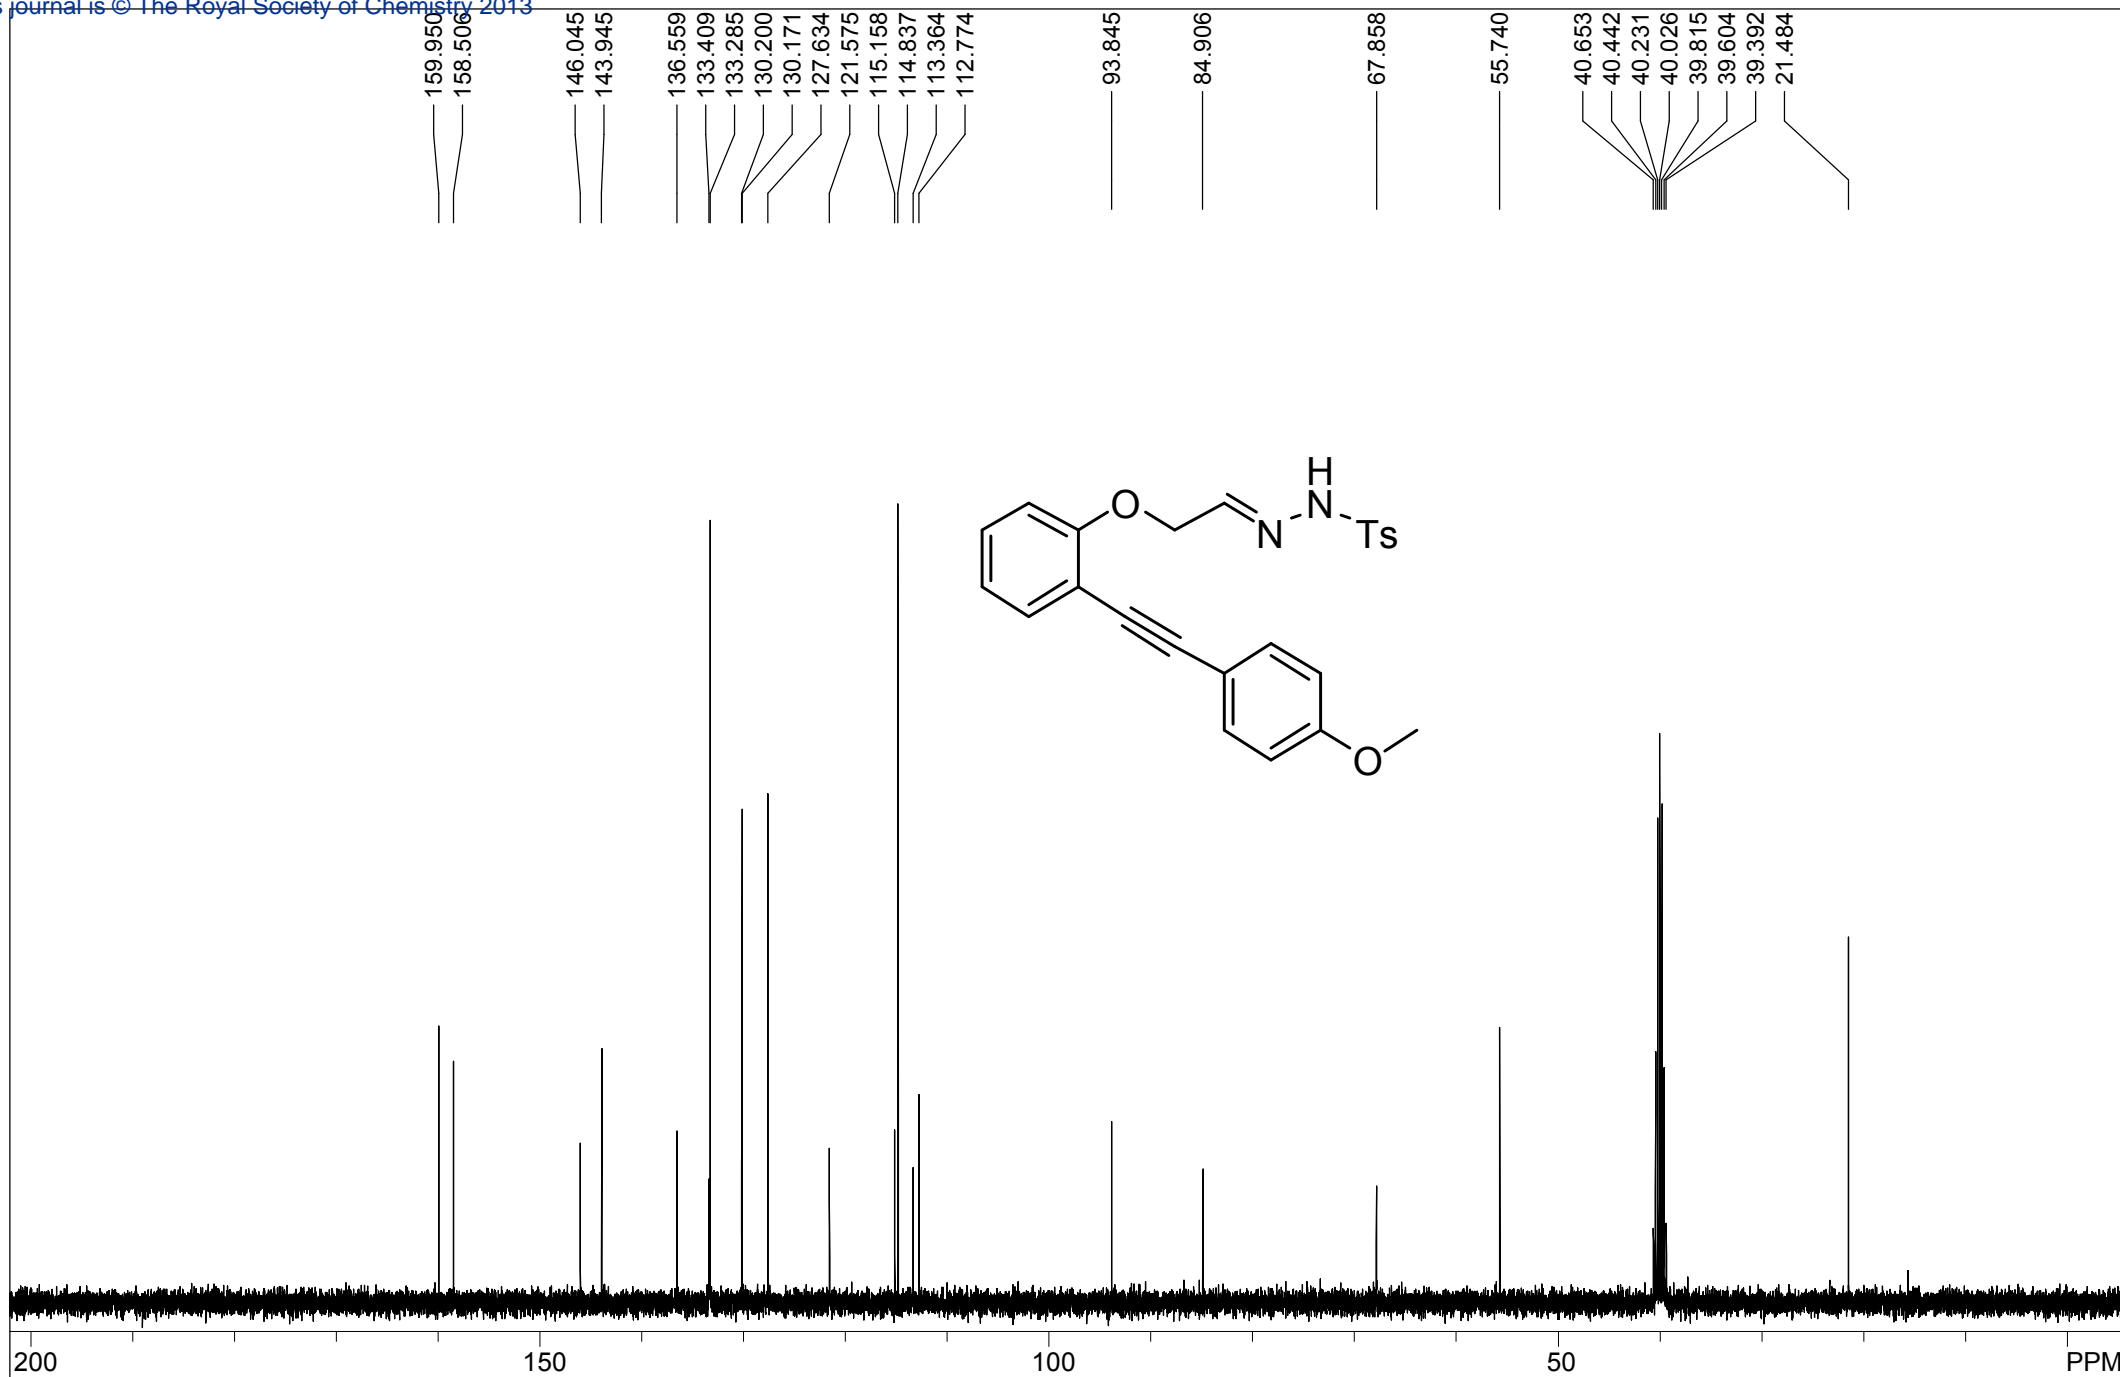

200 150 100 50 PPM

USER: Administr -- DATE: Thu Jun 30 22:30:44 2011

|             |            |             |              |                      |
|-------------|------------|-------------|--------------|----------------------|
| F1: 100.623 | F2: 1.000  | SW1: 24038  | OF1: 10063.0 | PTS1d: 32768 , 32768 |
| EX: zgpg30  | PW: 9.5 us | PD: 2.0 sec | NA: 100      | LB: 0.0              |
|             |            |             |              | Nuts - \$GWQ-2072_2  |

7.532  
7.511  
7.369  
7.352  
7.350  
7.117  
7.114  
7.097  
7.079  
7.076  
7.019  
7.013  
6.998  
6.992  
6.874  
6.854  
6.836

4.946

3.866

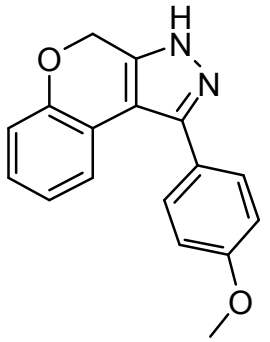

2|05  
1|02  
1|07  
1|01  
3|02

2|00

3|06

10 8 6 4 2 0 PPM

USER: Administr -- DATE: Thu Jun 30 11:33:34 2011

|             |           |             |             |             |         |                      |
|-------------|-----------|-------------|-------------|-------------|---------|----------------------|
| F1: 400.132 | F2: 1.000 | SW1: 8224   |             | OF1: 2461.3 |         | PTS1d: 32768 , 32768 |
| EX: zg30    |           | PW: 13.6 us | PD: 1.0 sec | NA: 2       | LB: 0.0 | Nuts - \$GWQ-2069_2  |

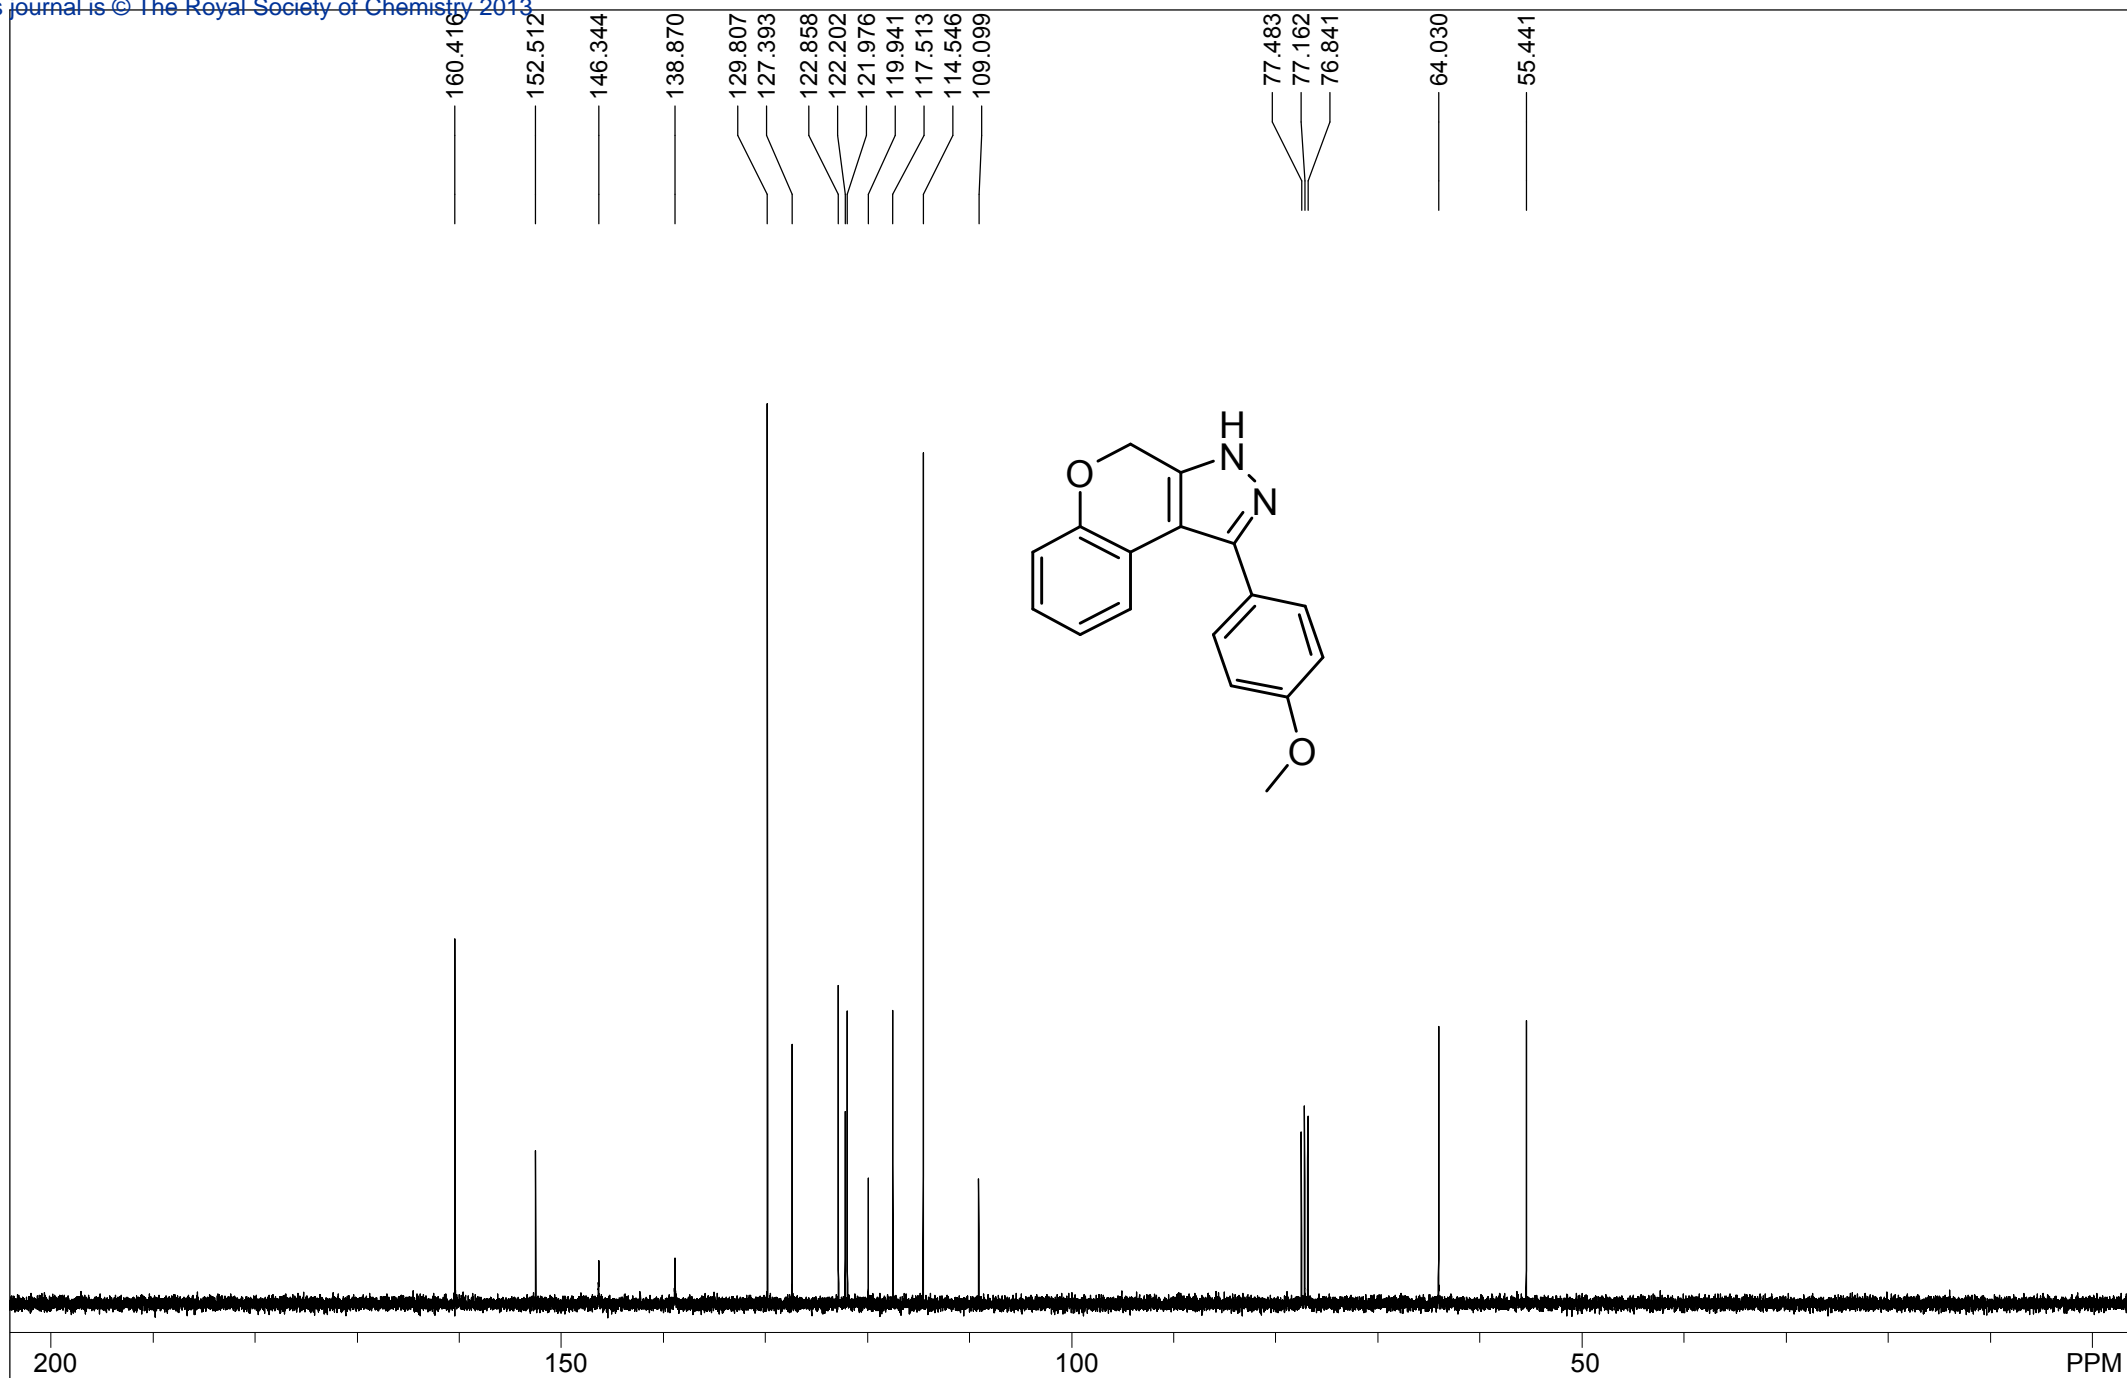

200

150

100

50

PPM

USER: Administr -- DATE: Thu Jun 30 11:59:31 2011

F1: 100.623

F2: 1.000

SW1: 24038

OF1: 10063.0

PTS1d: 32768 , 32768

EX: zgpg30

PW: 9.5 us

PD: 2.0 sec

NA: 50

LB: 0.0

Nuts - \$GWQ-2069\_3



7.350  
7.346  
7.331  
7.327  
7.175  
7.171  
7.156  
7.154  
7.152  
7.150  
7.136  
7.131  
6.903  
6.900  
6.884  
6.882  
6.865  
6.863  
6.744  
6.743  
6.724  
6.722  
4.651  
4.252  
4.234  
4.216  
4.198

1.511  
1.497  
1.491  
1.486  
1.478  
2.057  
1.471  
1.465  
1.464  
1.458  
1.445  
1.277  
1.259  
1.241  
0.878  
0.873  
0.857  
0.850  
0.846  
0.834  
0.830  
0.823  
0.821  
0.817  
0.811

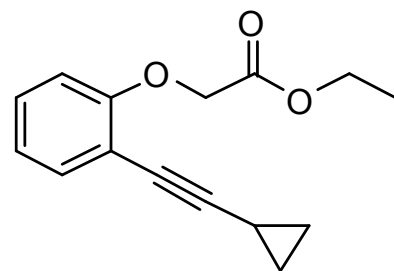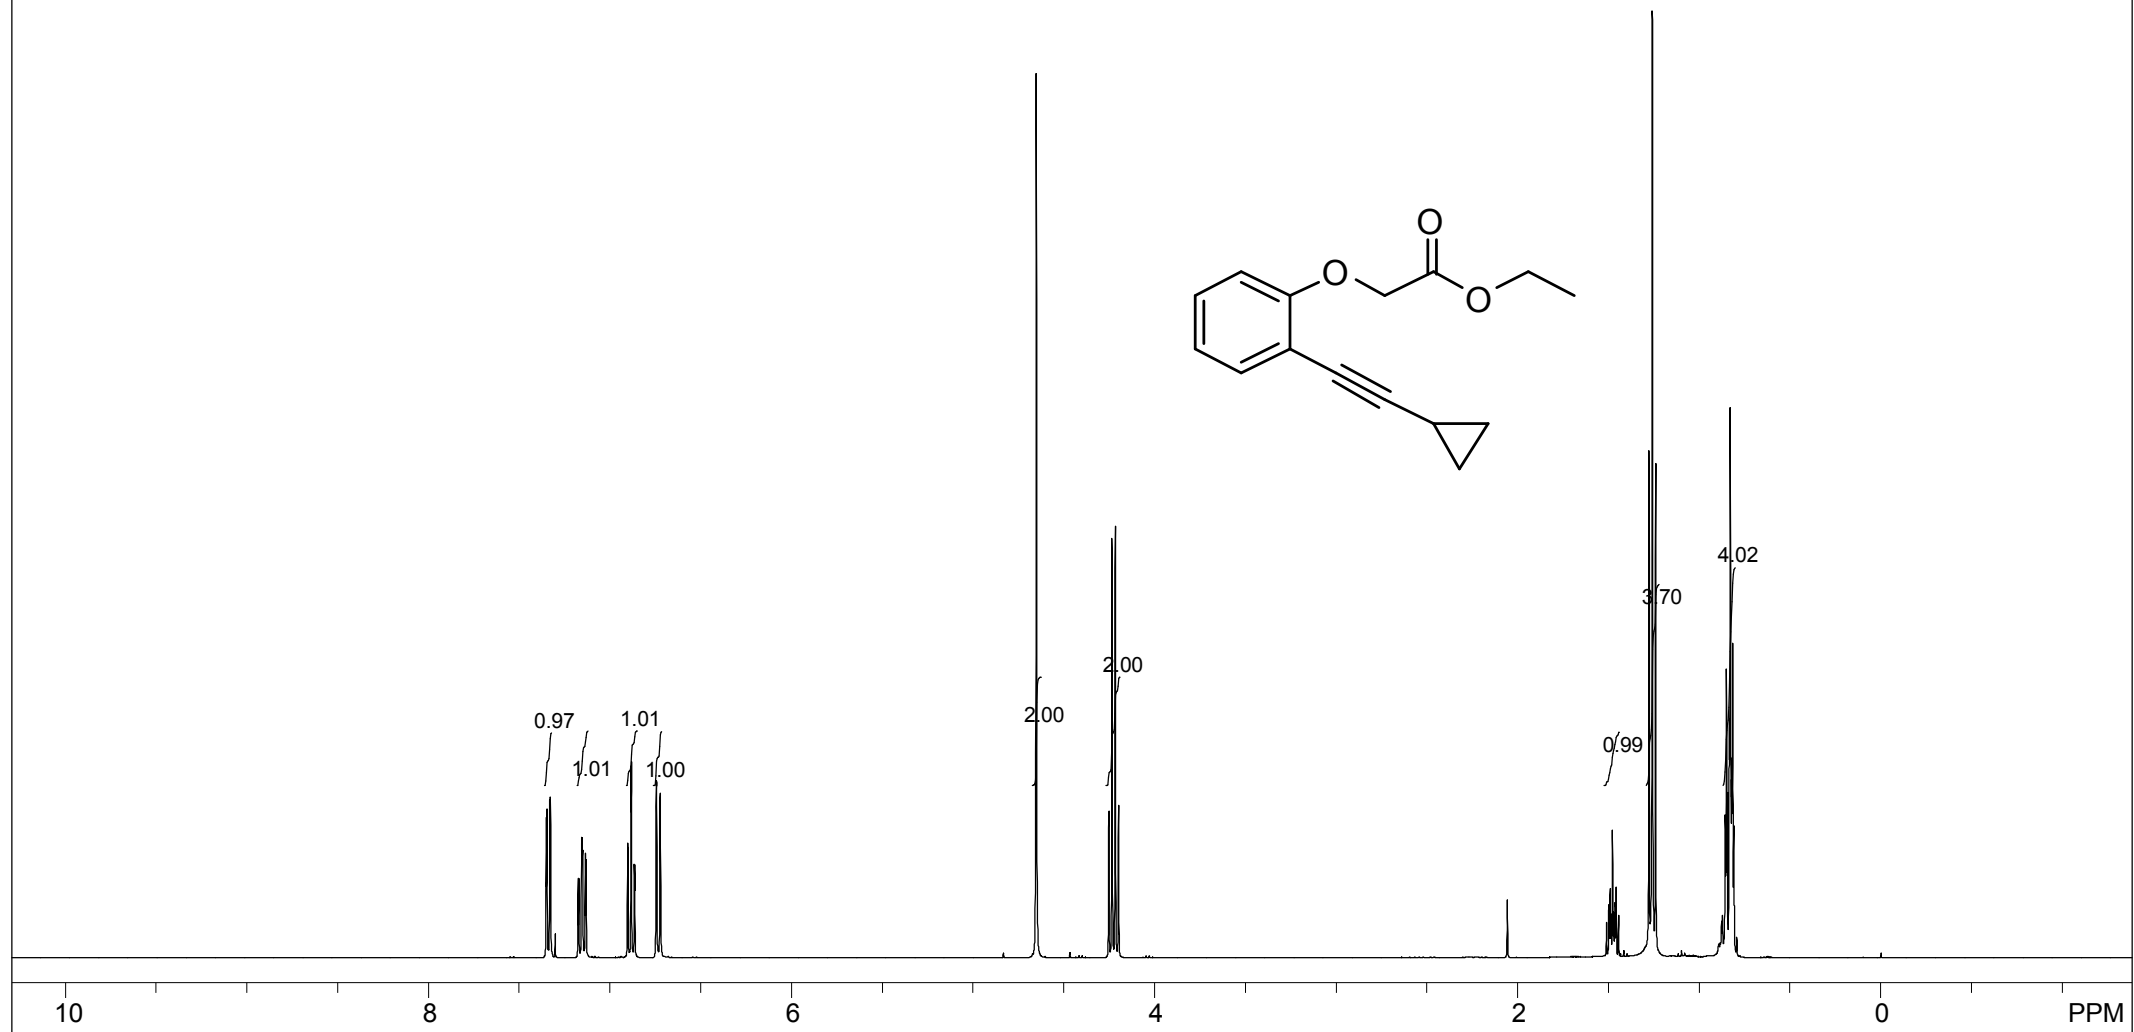

|                                                   |           |             |             |                                             |         |                      |                      |
|---------------------------------------------------|-----------|-------------|-------------|---------------------------------------------|---------|----------------------|----------------------|
| PROTON CDCl3 {D:\data\research\2011-6-23} nmr 48, |           |             |             | USER: nmr -- DATE: Thu Jun 23 16:31:55 2011 |         |                      |                      |
| F1: 400.132                                       | F2: 1.000 | SW1: 8224   |             | OF1: 2478.6                                 |         | PTS1d: 32768 , 32768 |                      |
| EX: zg30                                          |           | PW: 14.9 us | PD: 1.0 sec | NA: 16                                      | LB: 0.0 |                      | Nuts - \$GWQ-2066_10 |

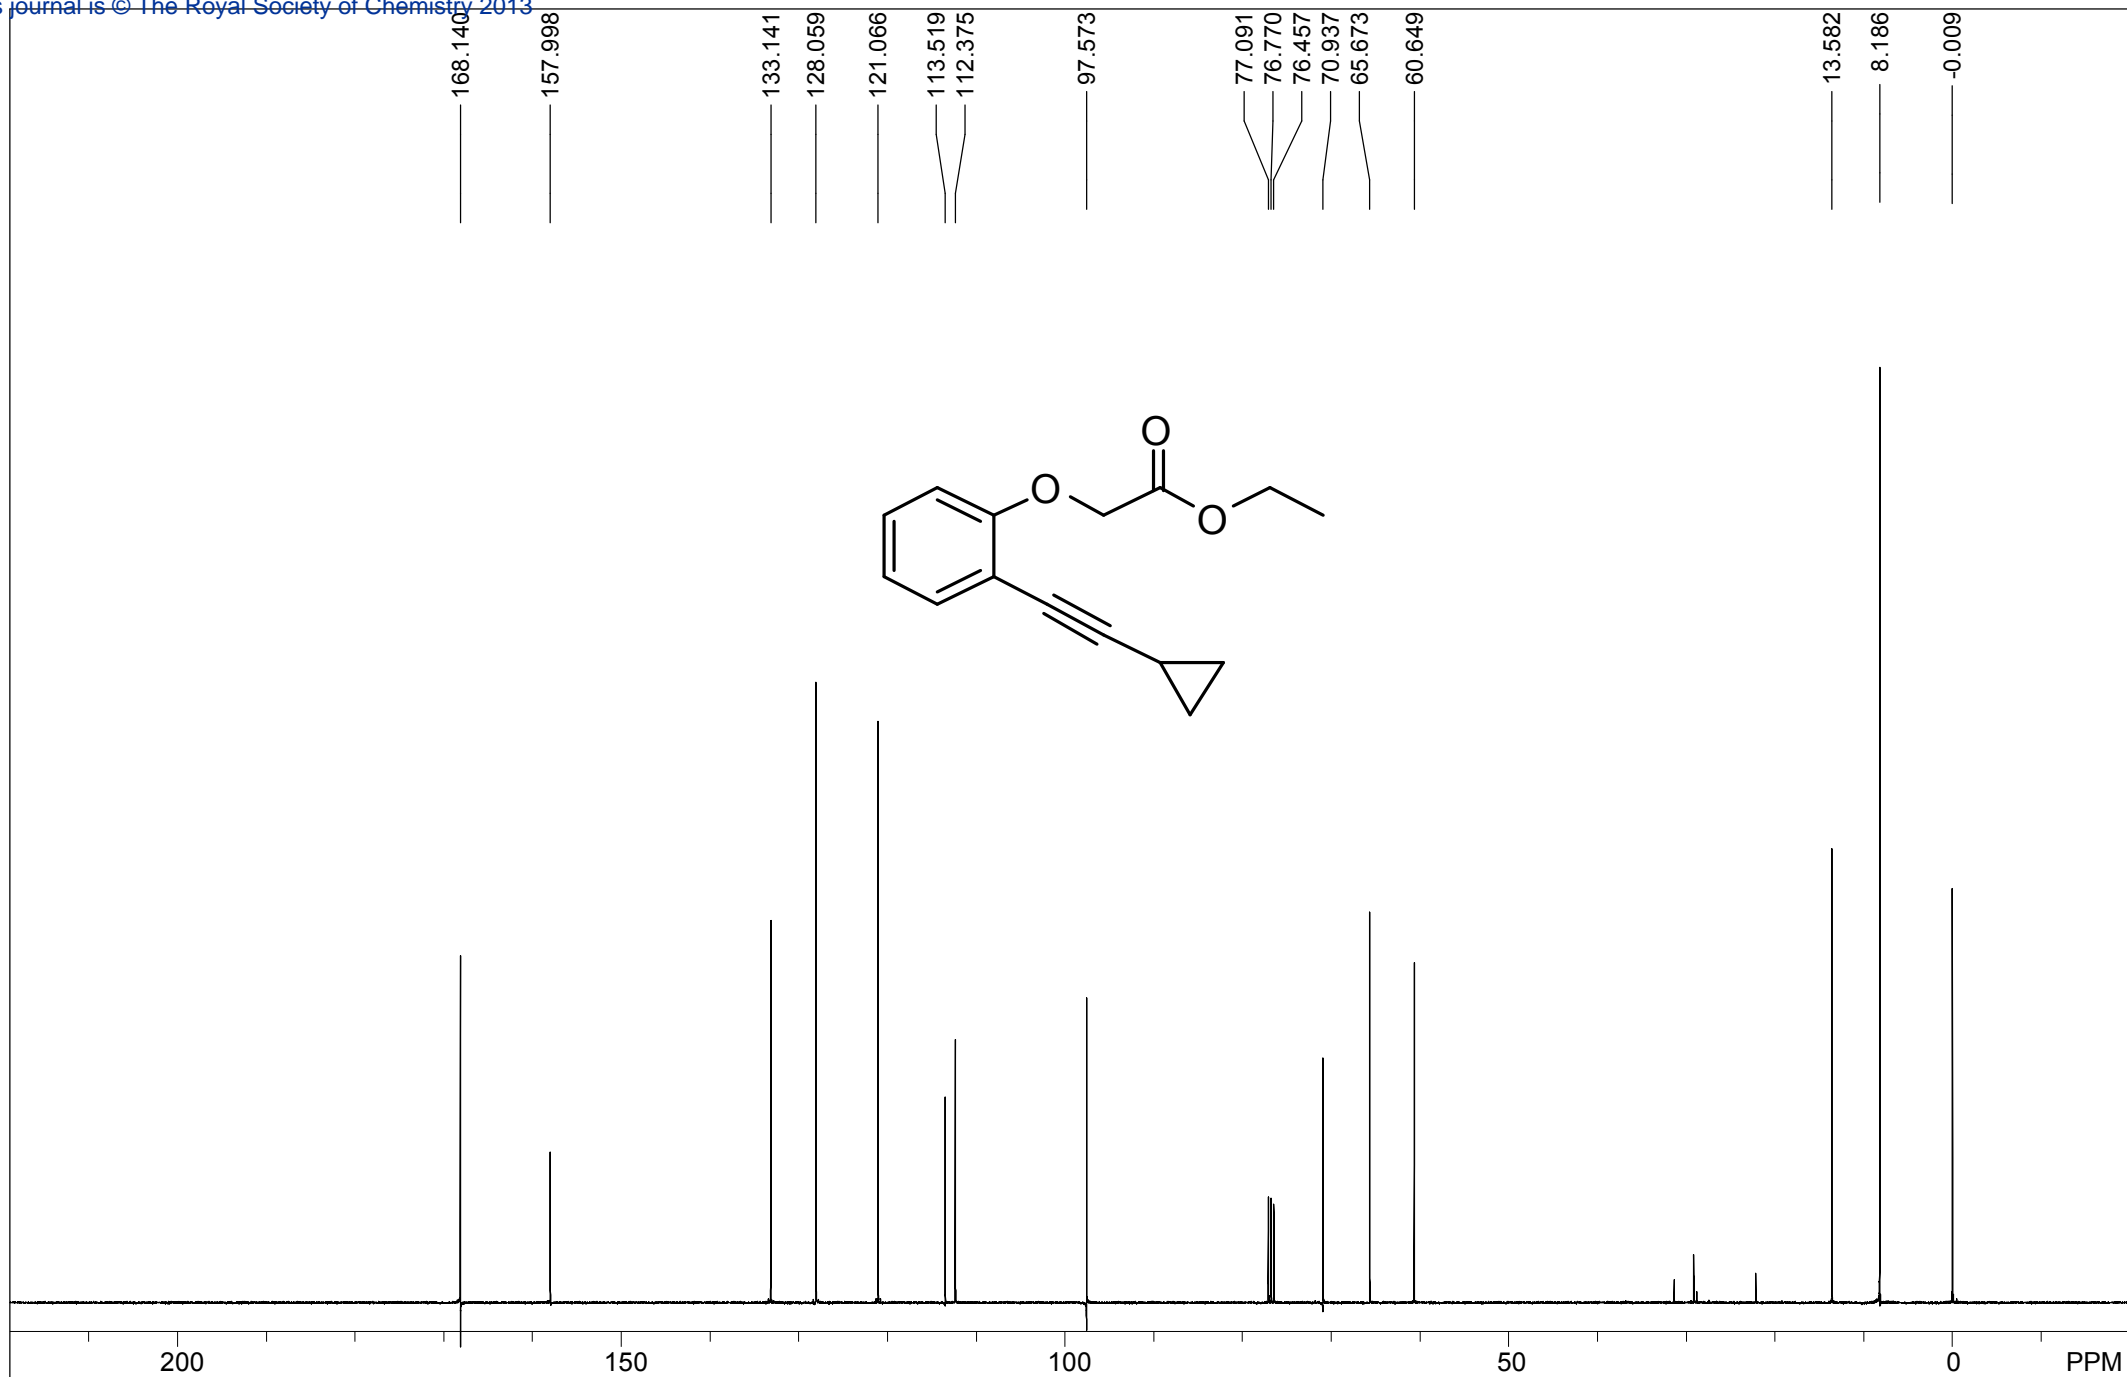

C13CPD CDCl3 {D:\data\research\2011-6-23} nmr 48, .

USER: nmr -- DATE: Thu Jun 23 17:01:44 2011

|             |           |            |             |              |         |                      |                      |
|-------------|-----------|------------|-------------|--------------|---------|----------------------|----------------------|
| F1: 100.623 | F2: 1.000 | SW1: 24038 |             | OF1: 10008.2 |         | PTS1d: 32768 , 32768 |                      |
| EX: zgpg30  |           | PW: 9.0 us | PD: 2.0 sec | NA: 500      | LB: 0.0 |                      | Nuts - \$GWQ-2066_11 |

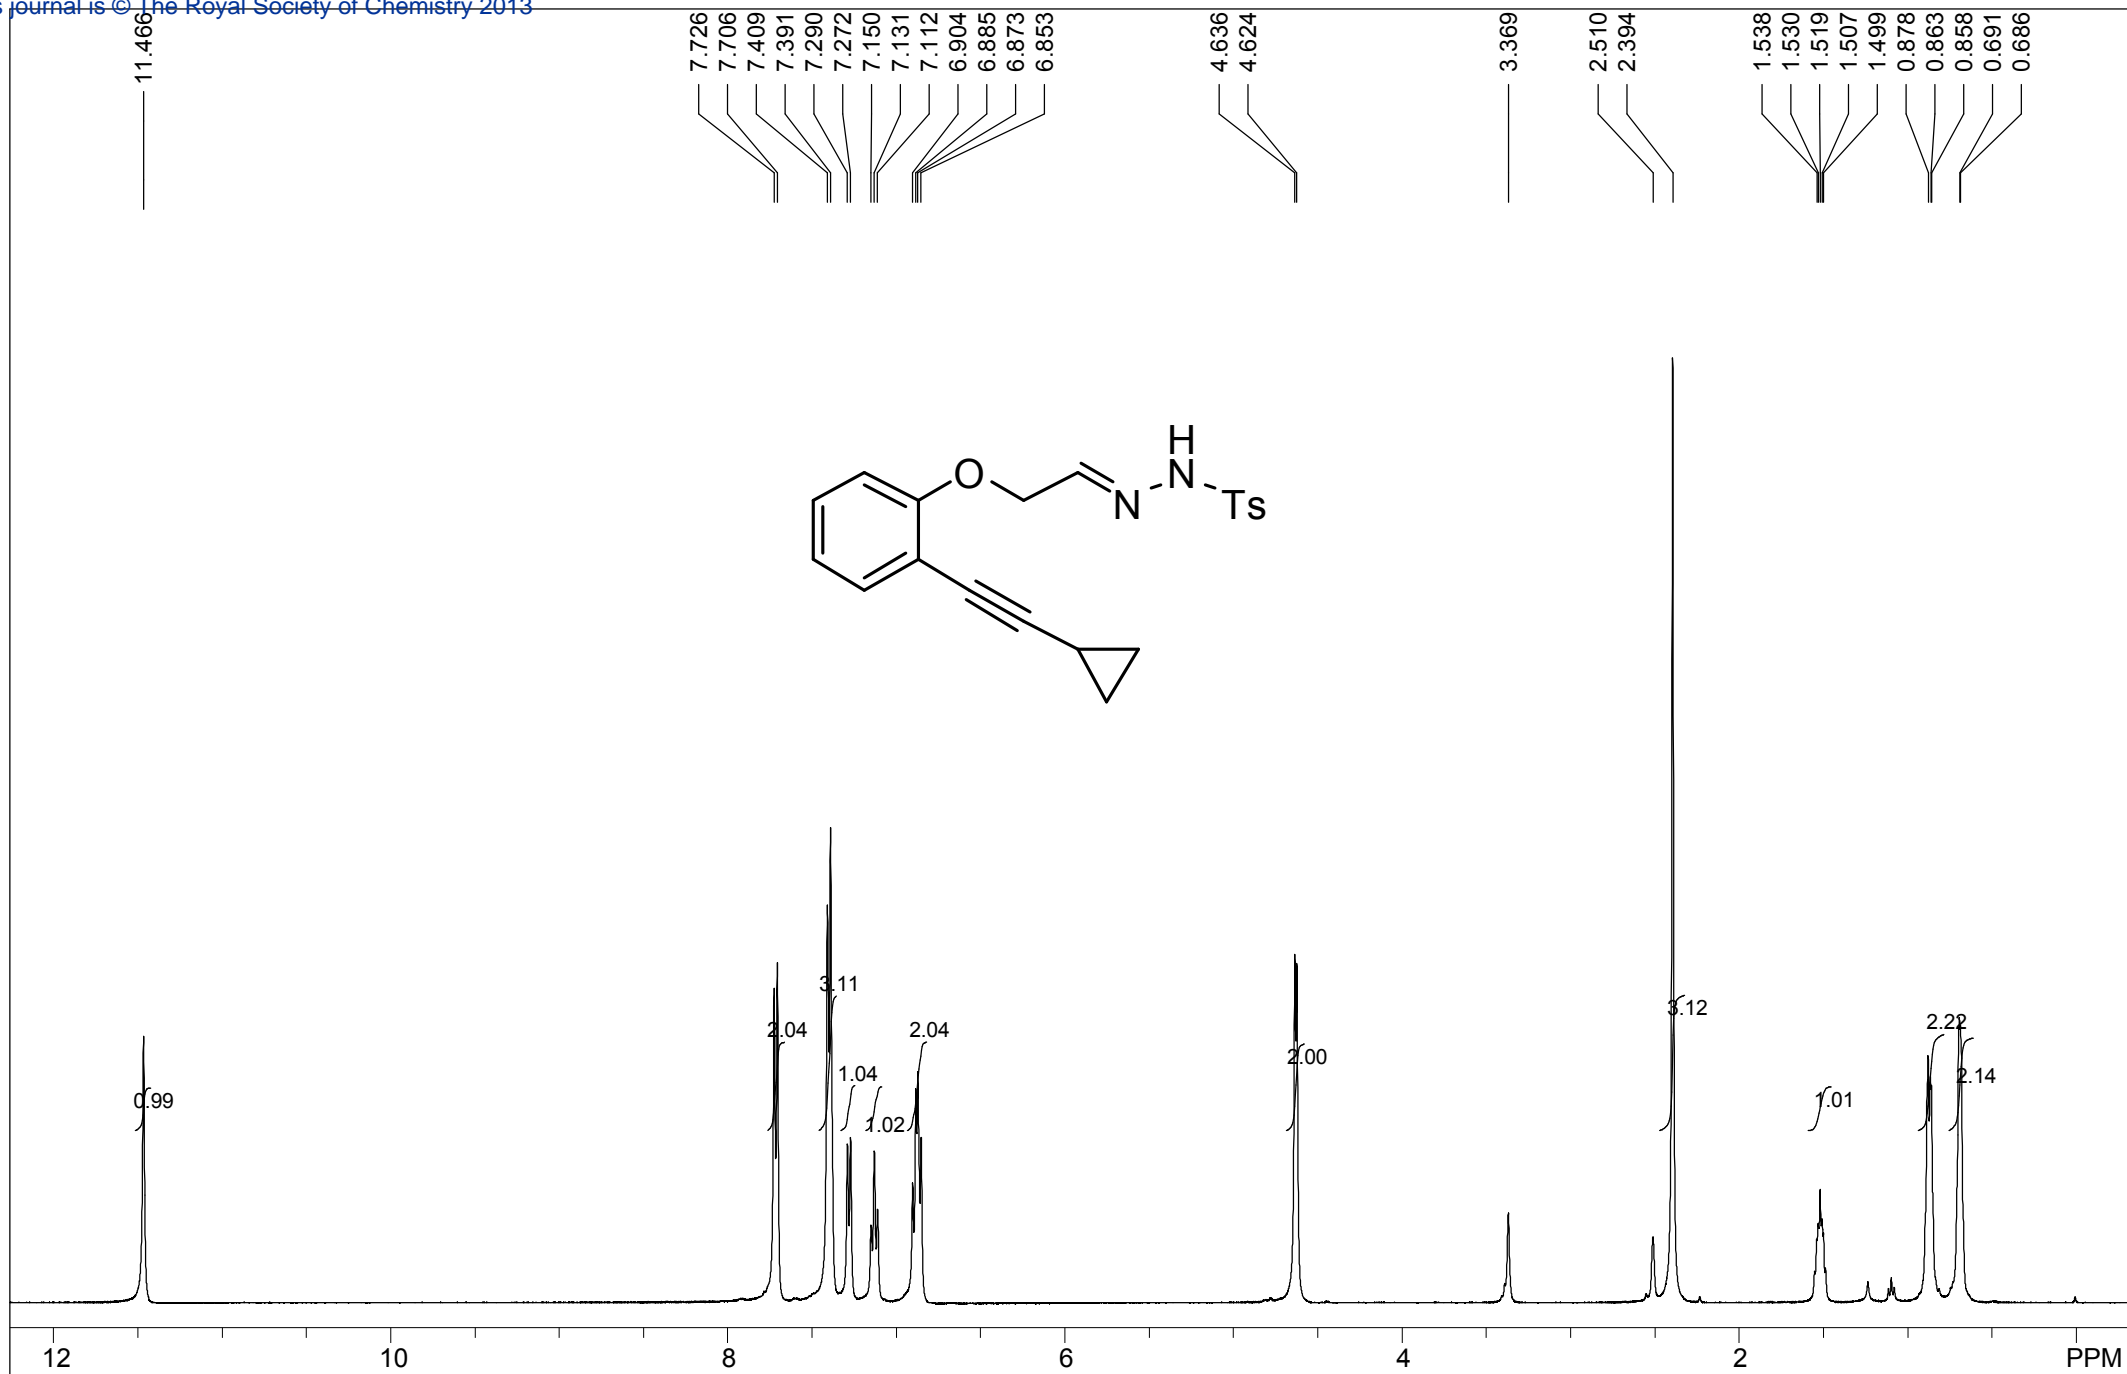

USER: Administr -- DATE: Thu Jun 30 22:46:18 2011

|             |           |             |             |             |         |                      |                     |
|-------------|-----------|-------------|-------------|-------------|---------|----------------------|---------------------|
| F1: 400.132 | F2: 1.000 | SW1: 8224   |             | OF1: 2471.8 |         | PTS1d: 32768 , 32768 |                     |
| EX: zg30    |           | PW: 13.6 us | PD: 1.0 sec | NA: 2       | LB: 0.0 |                      | Nuts - \$GWQ-2074_4 |

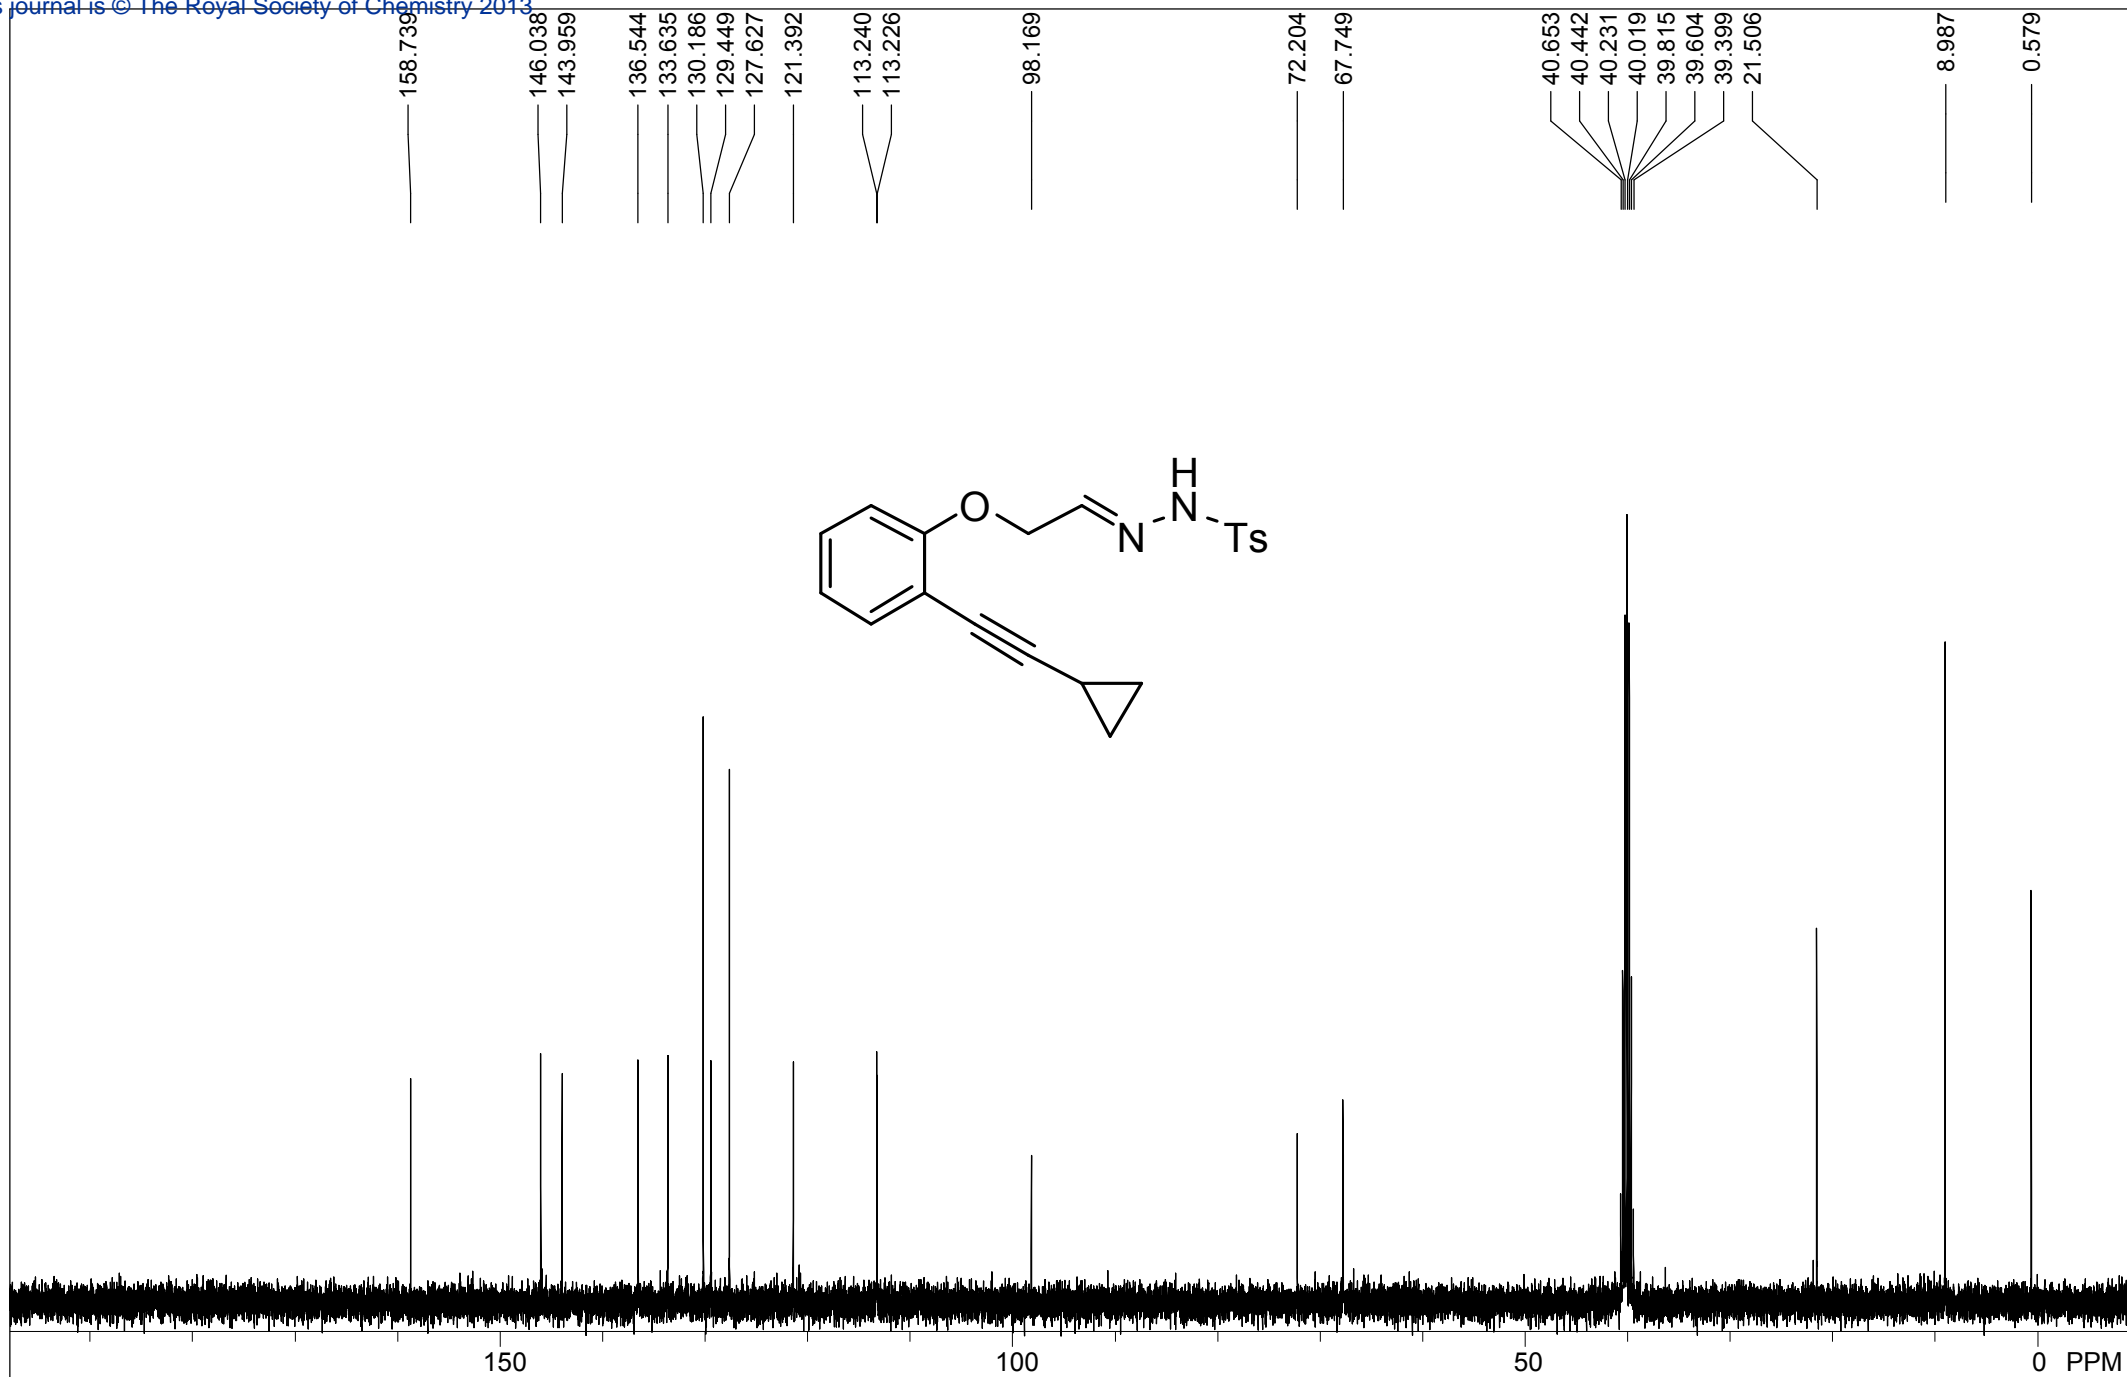

150

100

50

0 PPM

USER: Administr -- DATE: Thu Jun 30 22:50:00 2011

|             |           |            |             |              |         |                      |                     |
|-------------|-----------|------------|-------------|--------------|---------|----------------------|---------------------|
| F1: 100.623 | F2: 1.000 | SW1: 24038 |             | OF1: 10063.0 |         | PTS1d: 32768 , 32768 |                     |
| EX: zgpg30  |           | PW: 9.5 us | PD: 2.0 sec | NA: 50       | LB: 0.0 |                      | Nuts - \$GWQ-2074_5 |

7.667  
7.648  
7.260  
7.149  
7.130  
7.111  
7.040  
7.018  
6.996

5.268

2.428  
2.076  
2.063  
2.055  
2.042  
2.029  
2.021  
2.008  
1.088  
1.074  
1.053  
1.040  
0.842  
0.828  
0.815  
0.802

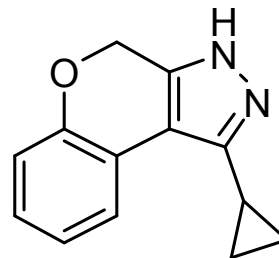

1/03  
2/09

2/00

1/07

2/08 2/07

10 8 6 4 2 0 PPM

USER: Administr -- DATE: Tue Jul 05 11:16:12 2011

|             |           |             |             |             |         |                      |                     |
|-------------|-----------|-------------|-------------|-------------|---------|----------------------|---------------------|
| F1: 400.132 | F2: 1.000 | SW1: 8224   |             | OF1: 2461.3 |         | PTS1d: 32768 , 32768 |                     |
| EX: zg30    |           | PW: 13.6 us | PD: 1.0 sec | NA: 2       | LB: 0.0 |                      | Nuts - \$GWQ-2078_1 |

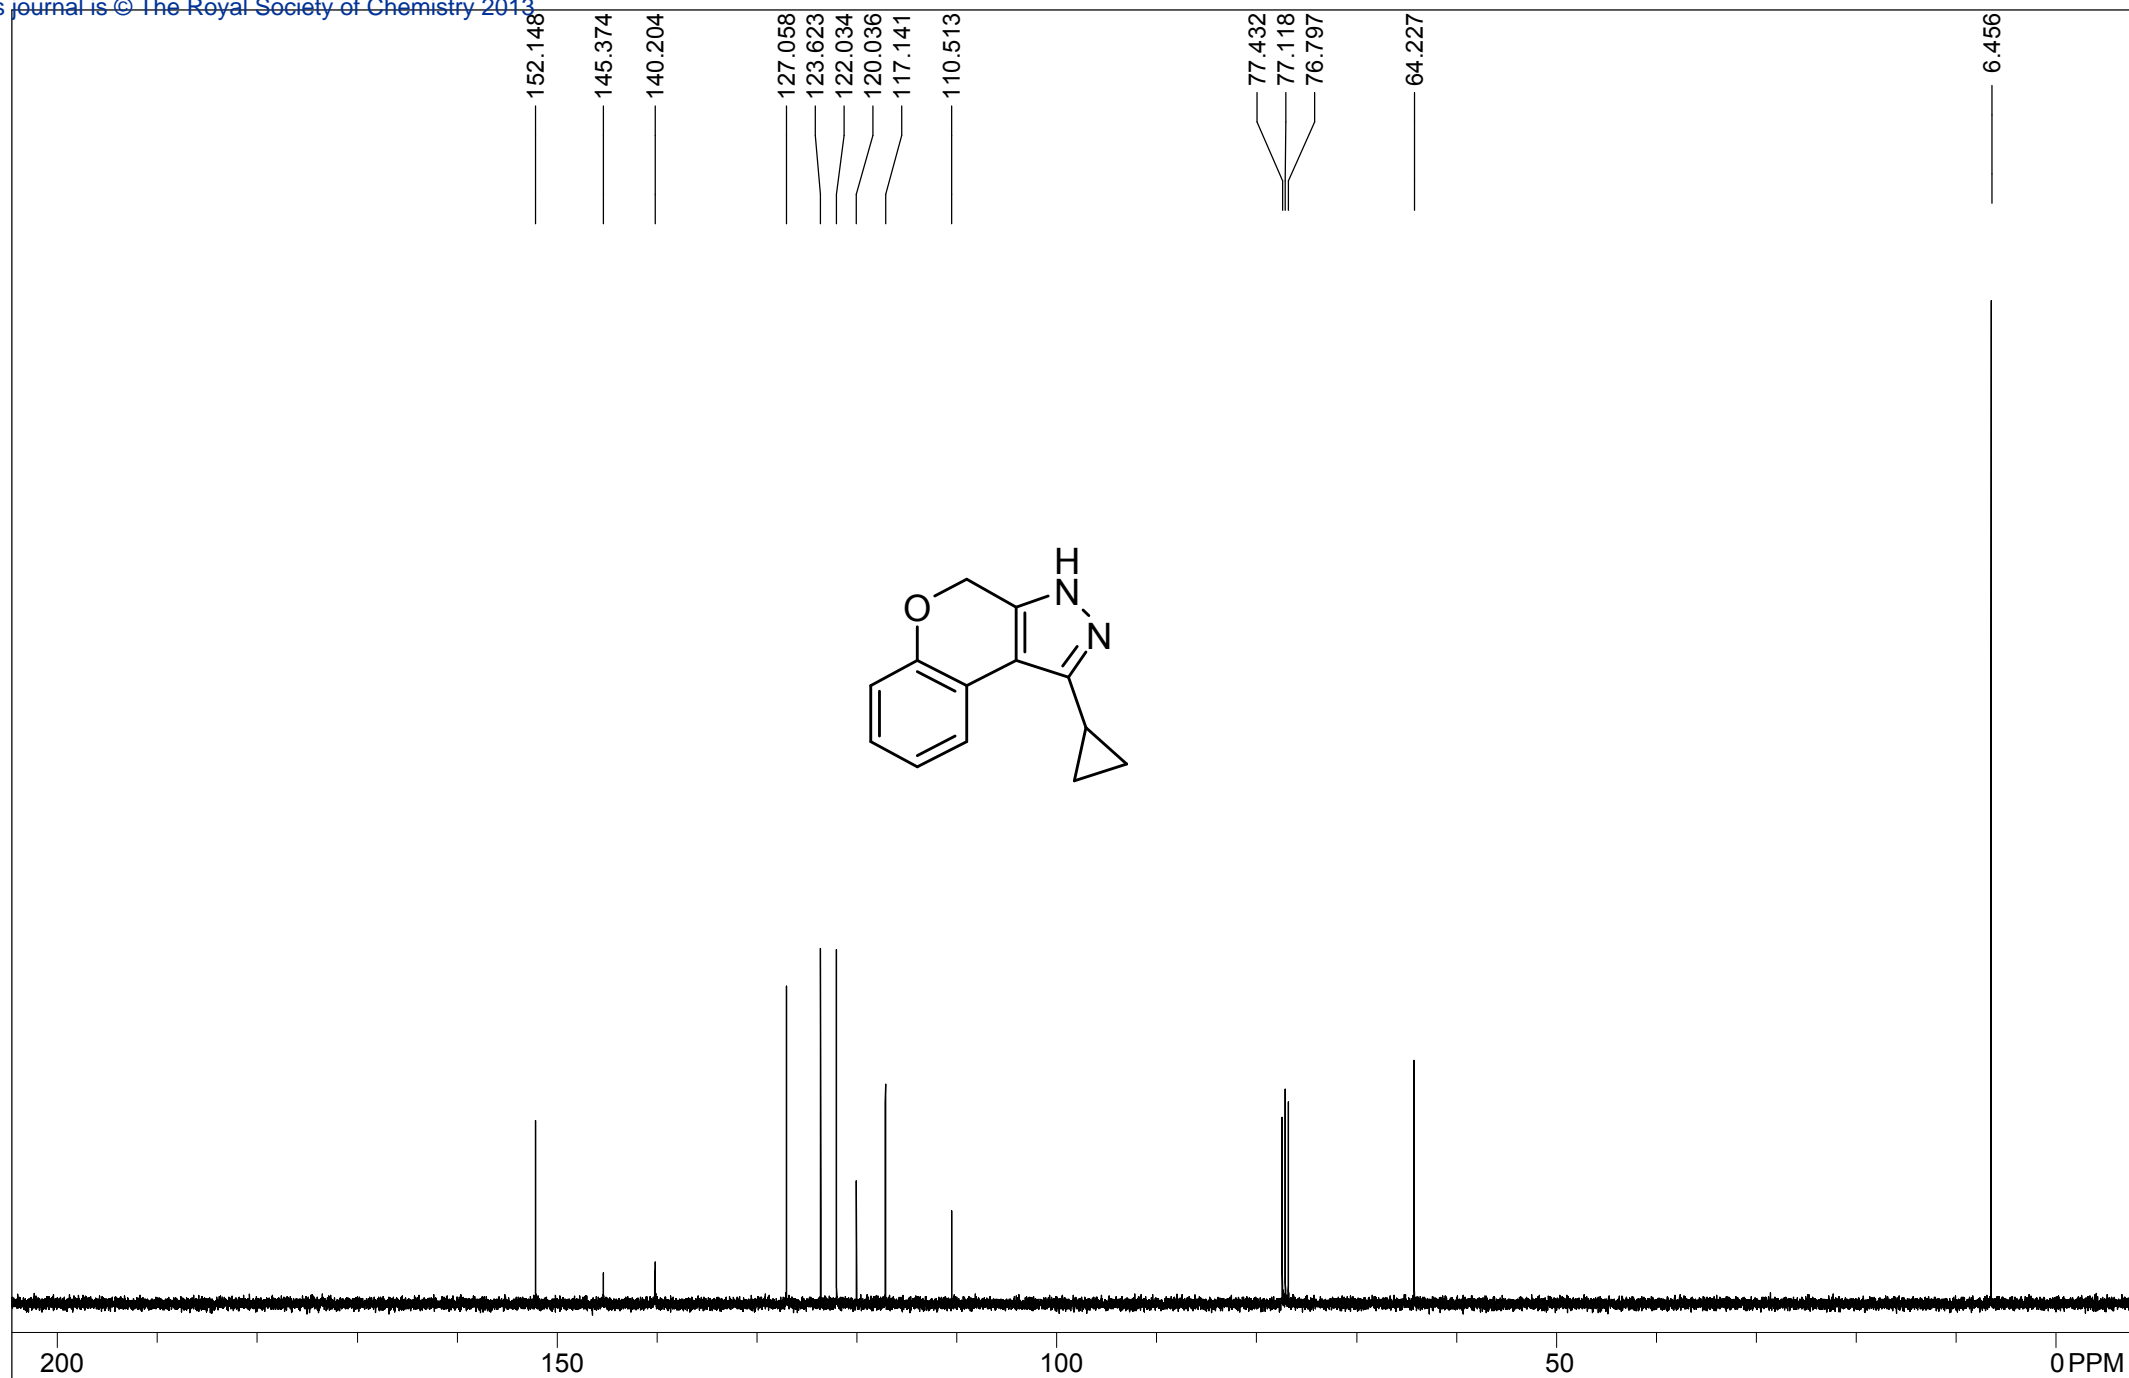

|             |  |  |  |  |  |  |            |  |  |  |  |  |  |             |  |  |  |  |  |  |              |  |  |  |  |  |  |                      |  |  |  |  |  |  |                                                   |  |  |  |  |  |  |
|-------------|--|--|--|--|--|--|------------|--|--|--|--|--|--|-------------|--|--|--|--|--|--|--------------|--|--|--|--|--|--|----------------------|--|--|--|--|--|--|---------------------------------------------------|--|--|--|--|--|--|
| 200         |  |  |  |  |  |  | 150        |  |  |  |  |  |  | 100         |  |  |  |  |  |  | 50           |  |  |  |  |  |  | 0 PPM                |  |  |  |  |  |  |                                                   |  |  |  |  |  |  |
| F1: 100.623 |  |  |  |  |  |  | F2: 1.000  |  |  |  |  |  |  | SW1: 24038  |  |  |  |  |  |  | OF1: 10063.0 |  |  |  |  |  |  | PTS1d: 32768 , 32768 |  |  |  |  |  |  | USER: Administr -- DATE: Tue Jul 05 11:23:30 2011 |  |  |  |  |  |  |
| EX: zgpg30  |  |  |  |  |  |  | PW: 9.5 us |  |  |  |  |  |  | PD: 2.0 sec |  |  |  |  |  |  | NA: 100      |  |  |  |  |  |  | LB: 0.0              |  |  |  |  |  |  | Nuts - \$GWQ-2078_2                               |  |  |  |  |  |  |

7.385, 7.380, 7.366, 7.362, 7.194, 7.190, 7.175, 7.174, 7.171, 7.169, 7.155, 7.150, 6.927, 6.924, 6.908, 6.906, 6.889, 6.887, 6.771, 6.770, 6.751, 6.749, 6.749, 4.675, 4.259, 4.241, 4.223, 4.205, 2.469, 2.452, 2.434, 1.641, 1.639, 1.624, 1.616, 1.606, 1.604, 1.598, 1.586, 1.580, 1.569, 1.533, 1.522, 1.516, 1.503, 1.497, 1.484, 1.477, 1.459, 1.281, 1.263, 1.245, 0.958, 0.939, 0.921

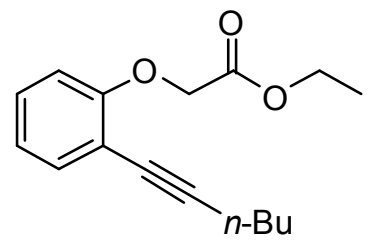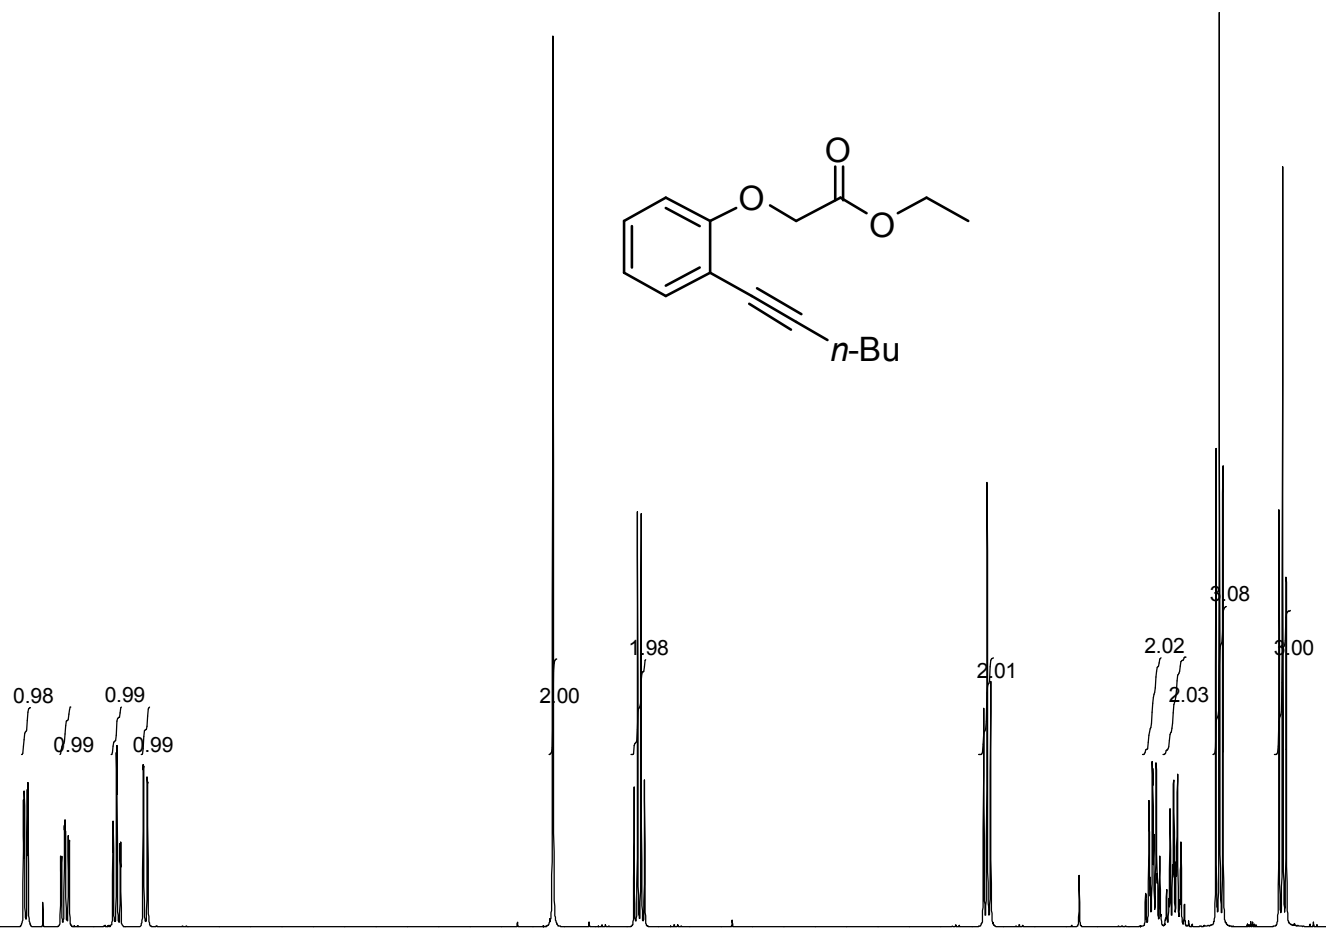

8 6 4 2 0 PPM

|                                                               |           |             |             |                                             |         |                      |                      |
|---------------------------------------------------------------|-----------|-------------|-------------|---------------------------------------------|---------|----------------------|----------------------|
| PROTON CDCl <sub>3</sub> {D:\data\research\2011-6-24} nmr 26, |           |             |             | USER: nmr -- DATE: Fri Jun 24 18:31:12 2011 |         |                      |                      |
| F1: 400.132                                                   | F2: 1.000 | SW1: 8224   |             | OF1: 2472.2                                 |         | PTS1d: 32768 , 32768 |                      |
| EX: zg30                                                      |           | PW: 14.9 us | PD: 1.0 sec | NA: 16                                      | LB: 0.0 |                      | Nuts - \$GWQ-2067_10 |

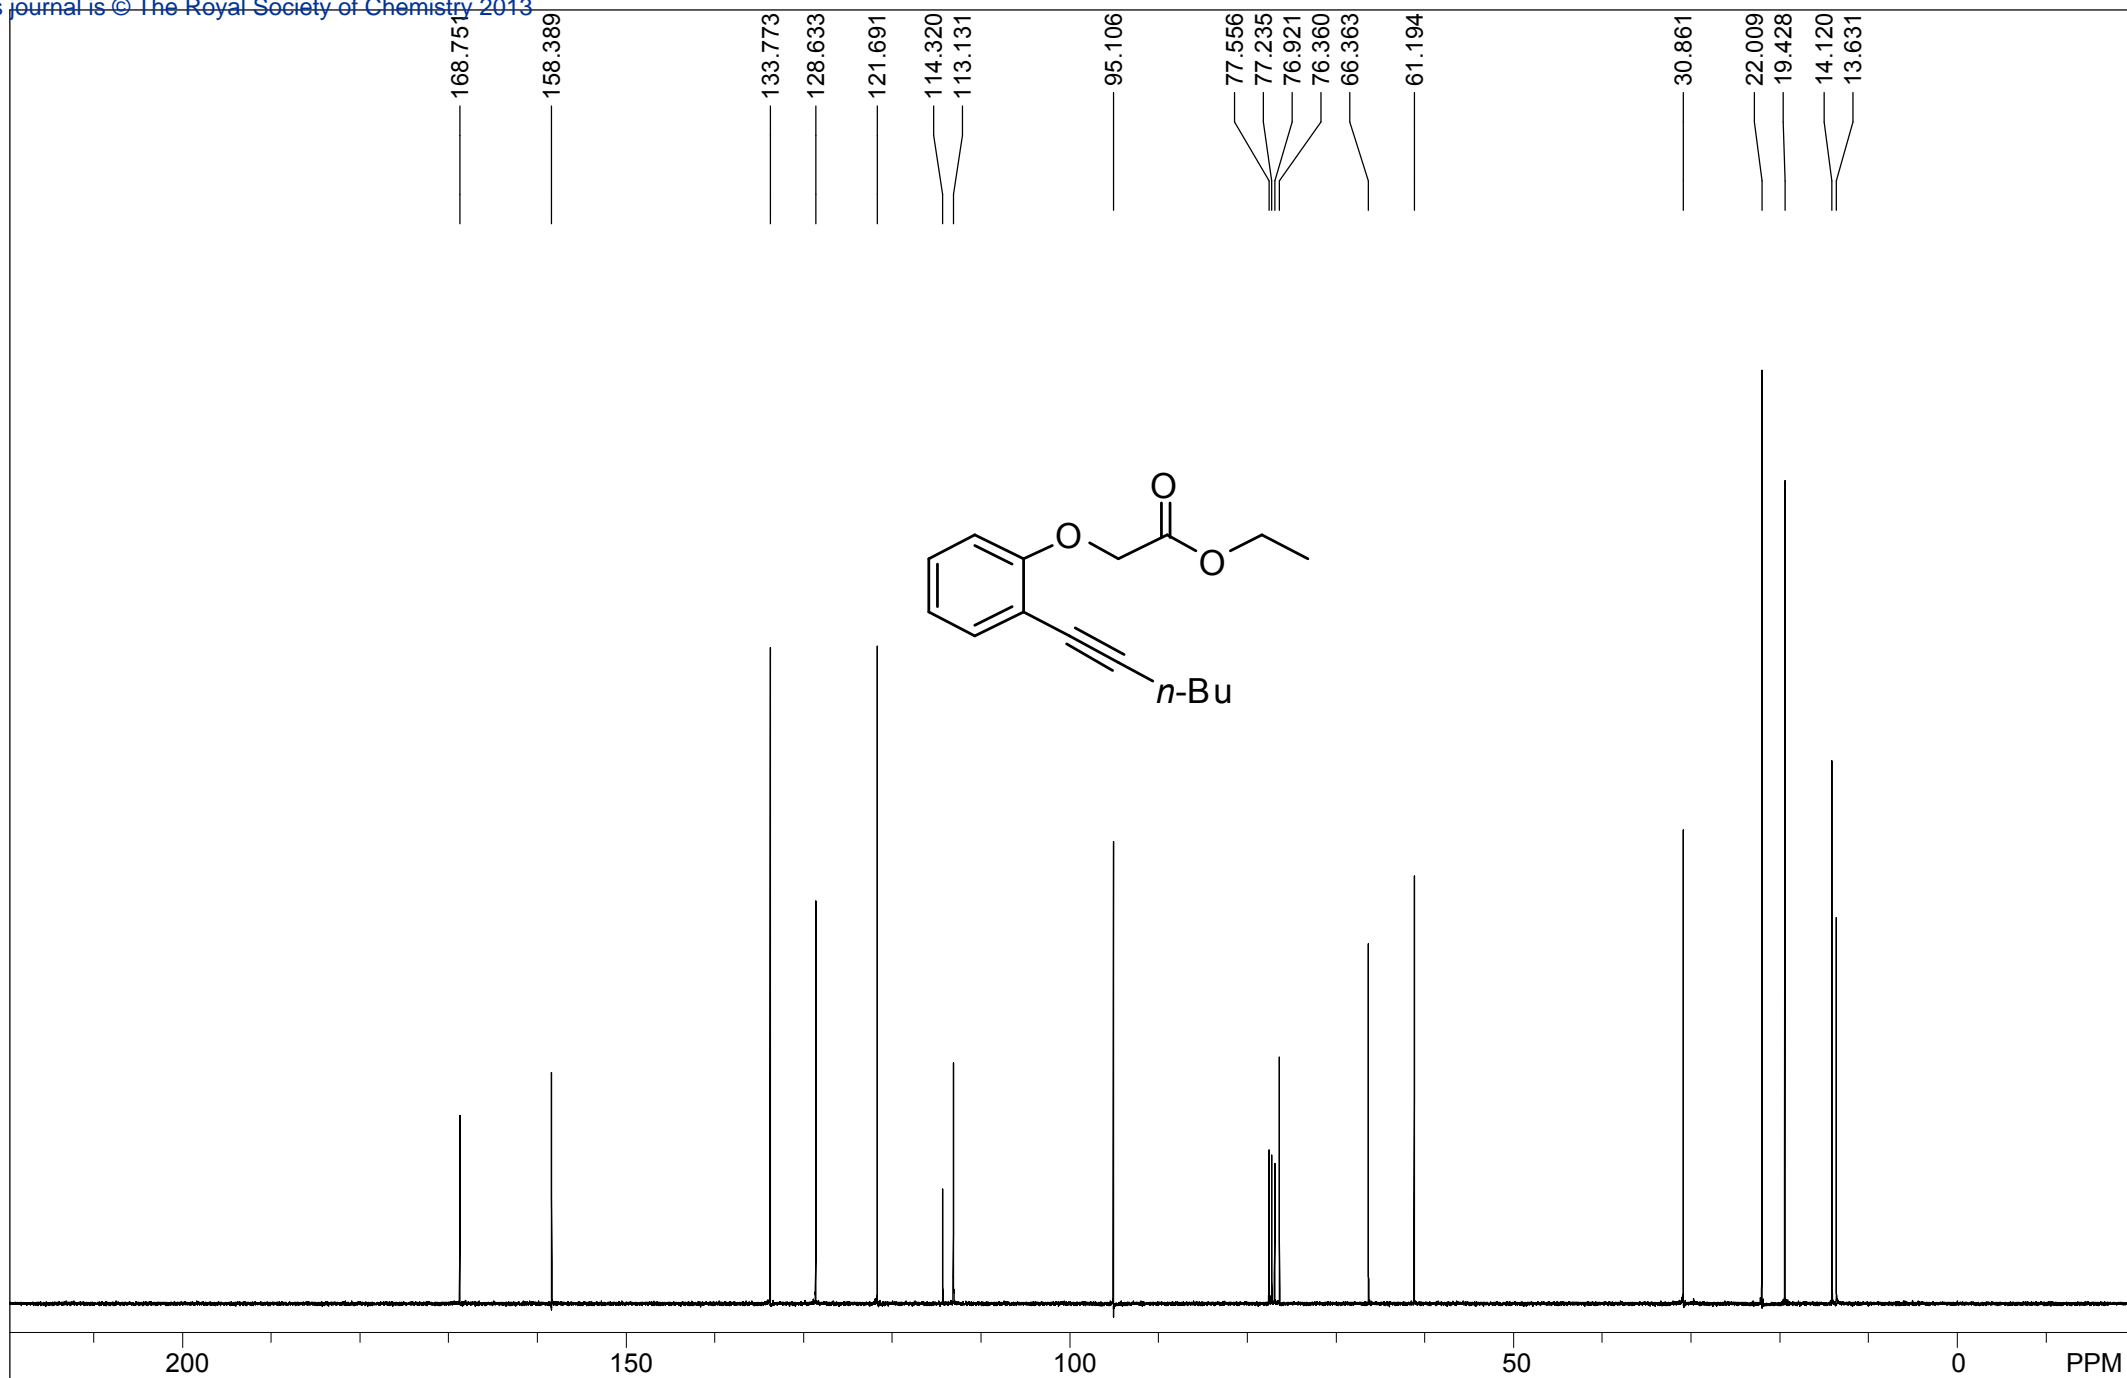

C13CPD CDCI3 {D:\data\research\2011-6-24} nmr 26, .

USER: nmr -- DATE: Fri Jun 24 18:55:05 2011

|             |           |            |             |              |         |                      |                      |
|-------------|-----------|------------|-------------|--------------|---------|----------------------|----------------------|
| F1: 100.623 | F2: 1.000 | SW1: 24038 |             | OF1: 10063.0 |         | PTS1d: 32768 , 32768 |                      |
| EX: zgpg30  |           | PW: 9.0 us | PD: 2.0 sec | NA: 400      | LB: 0.0 |                      | Nuts - \$GWQ-2067_11 |



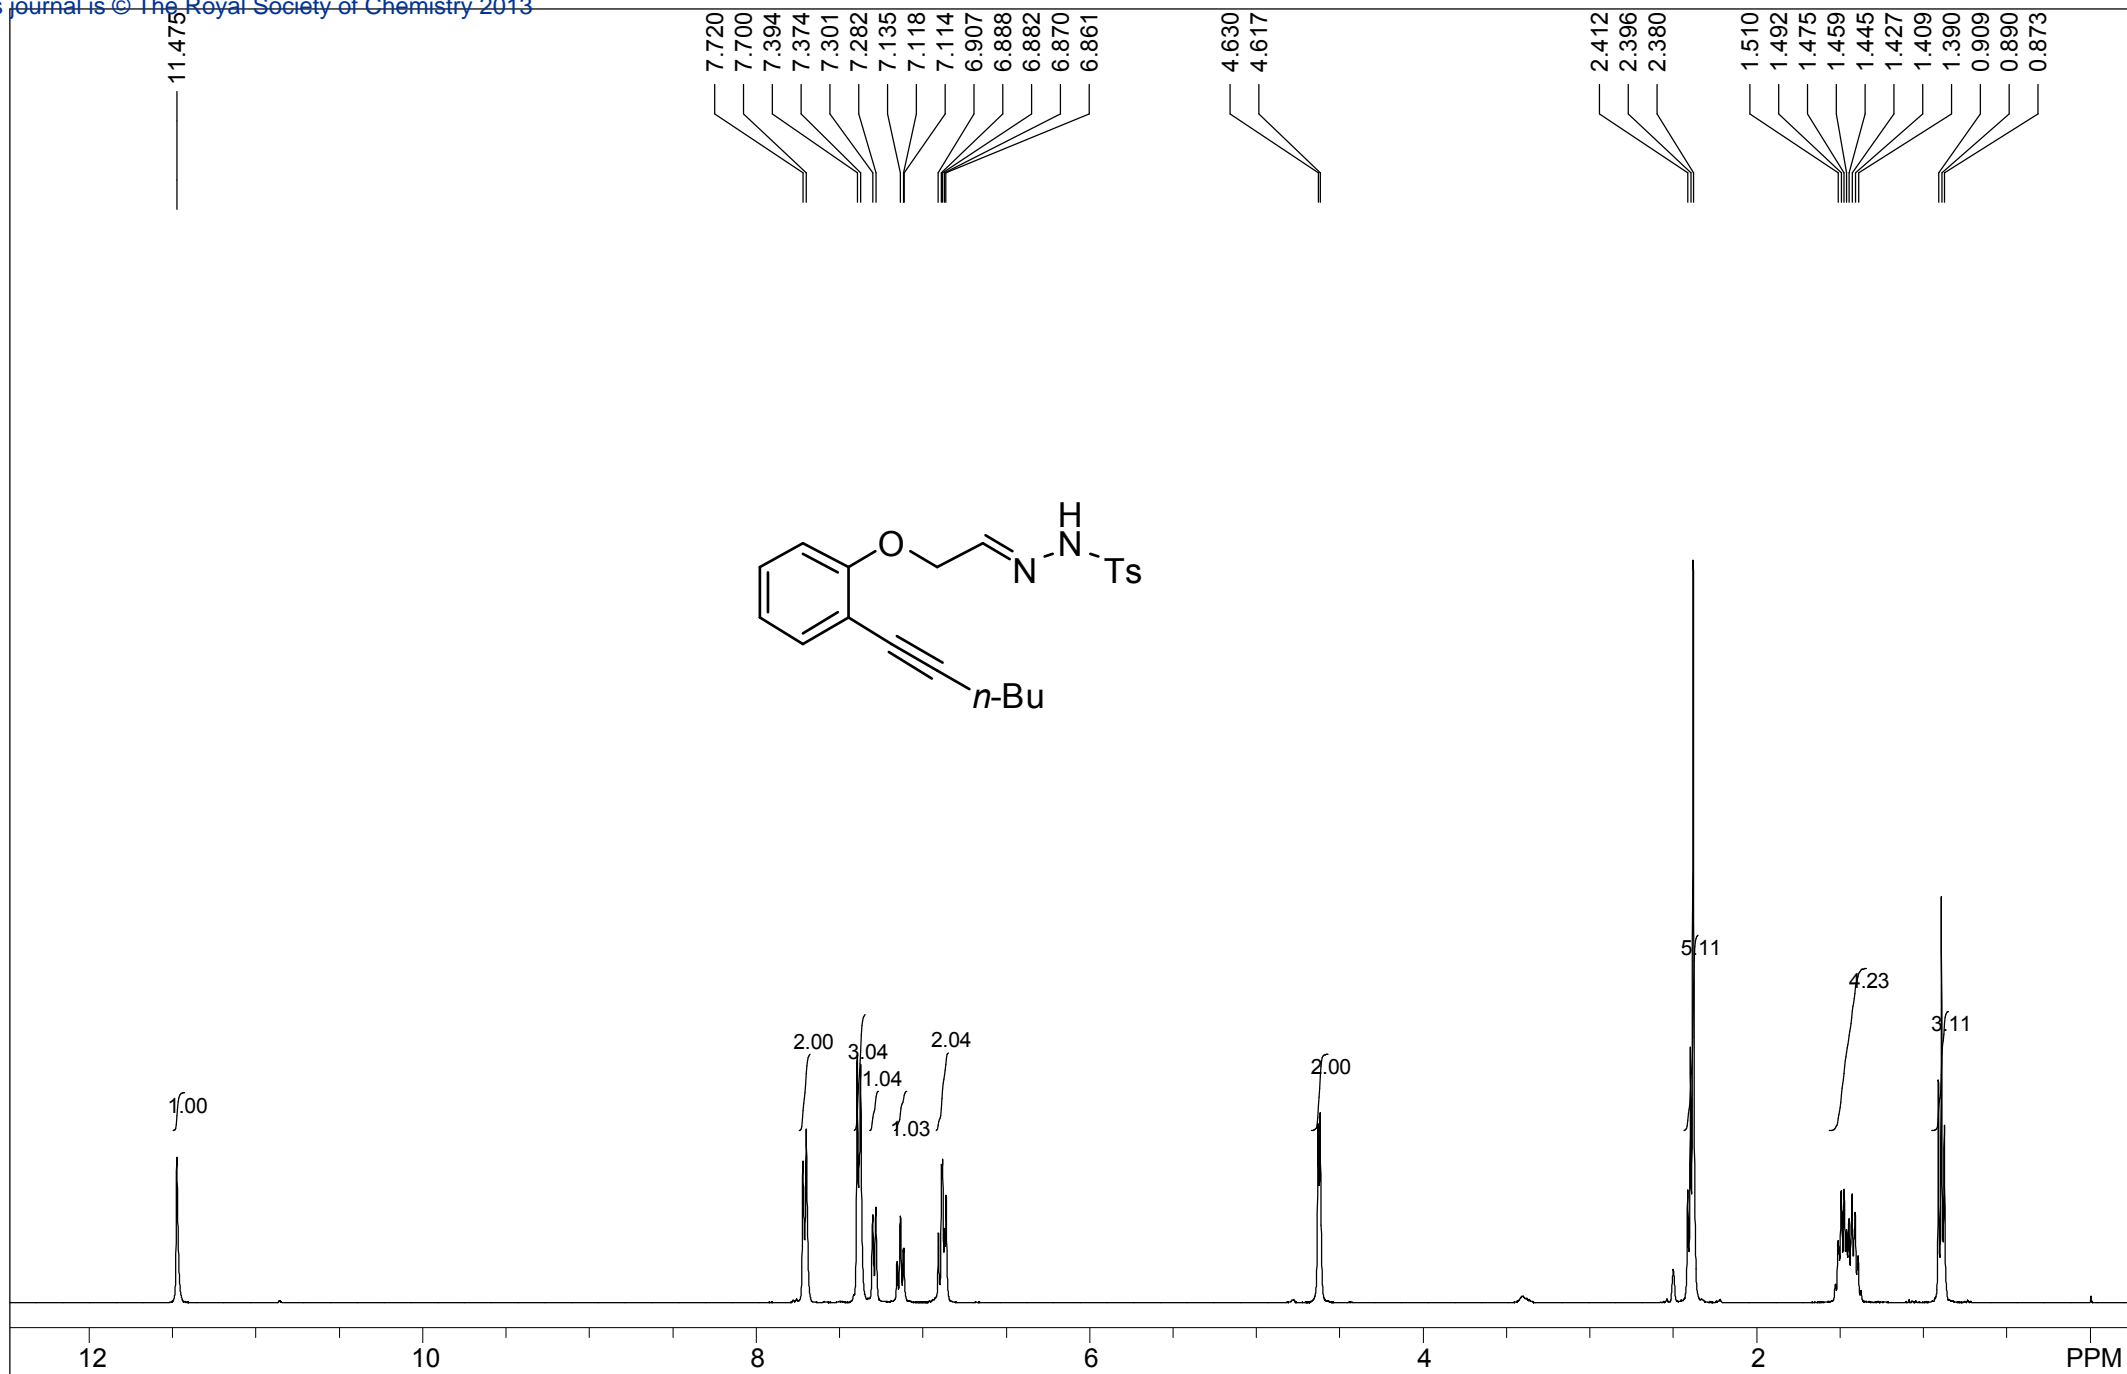

USER: Administr -- DATE: Thu Jun 30 22:55:36 2011

|             |           |             |             |             |         |                      |                     |
|-------------|-----------|-------------|-------------|-------------|---------|----------------------|---------------------|
| F1: 400.132 | F2: 1.000 | SW1: 8224   |             | OF1: 2467.1 |         | PTS1d: 32768 , 32768 |                     |
| EX: zg30    |           | PW: 13.6 us | PD: 1.0 sec | NA: 2       | LB: 0.0 |                      | Nuts - \$GWQ-2075_5 |

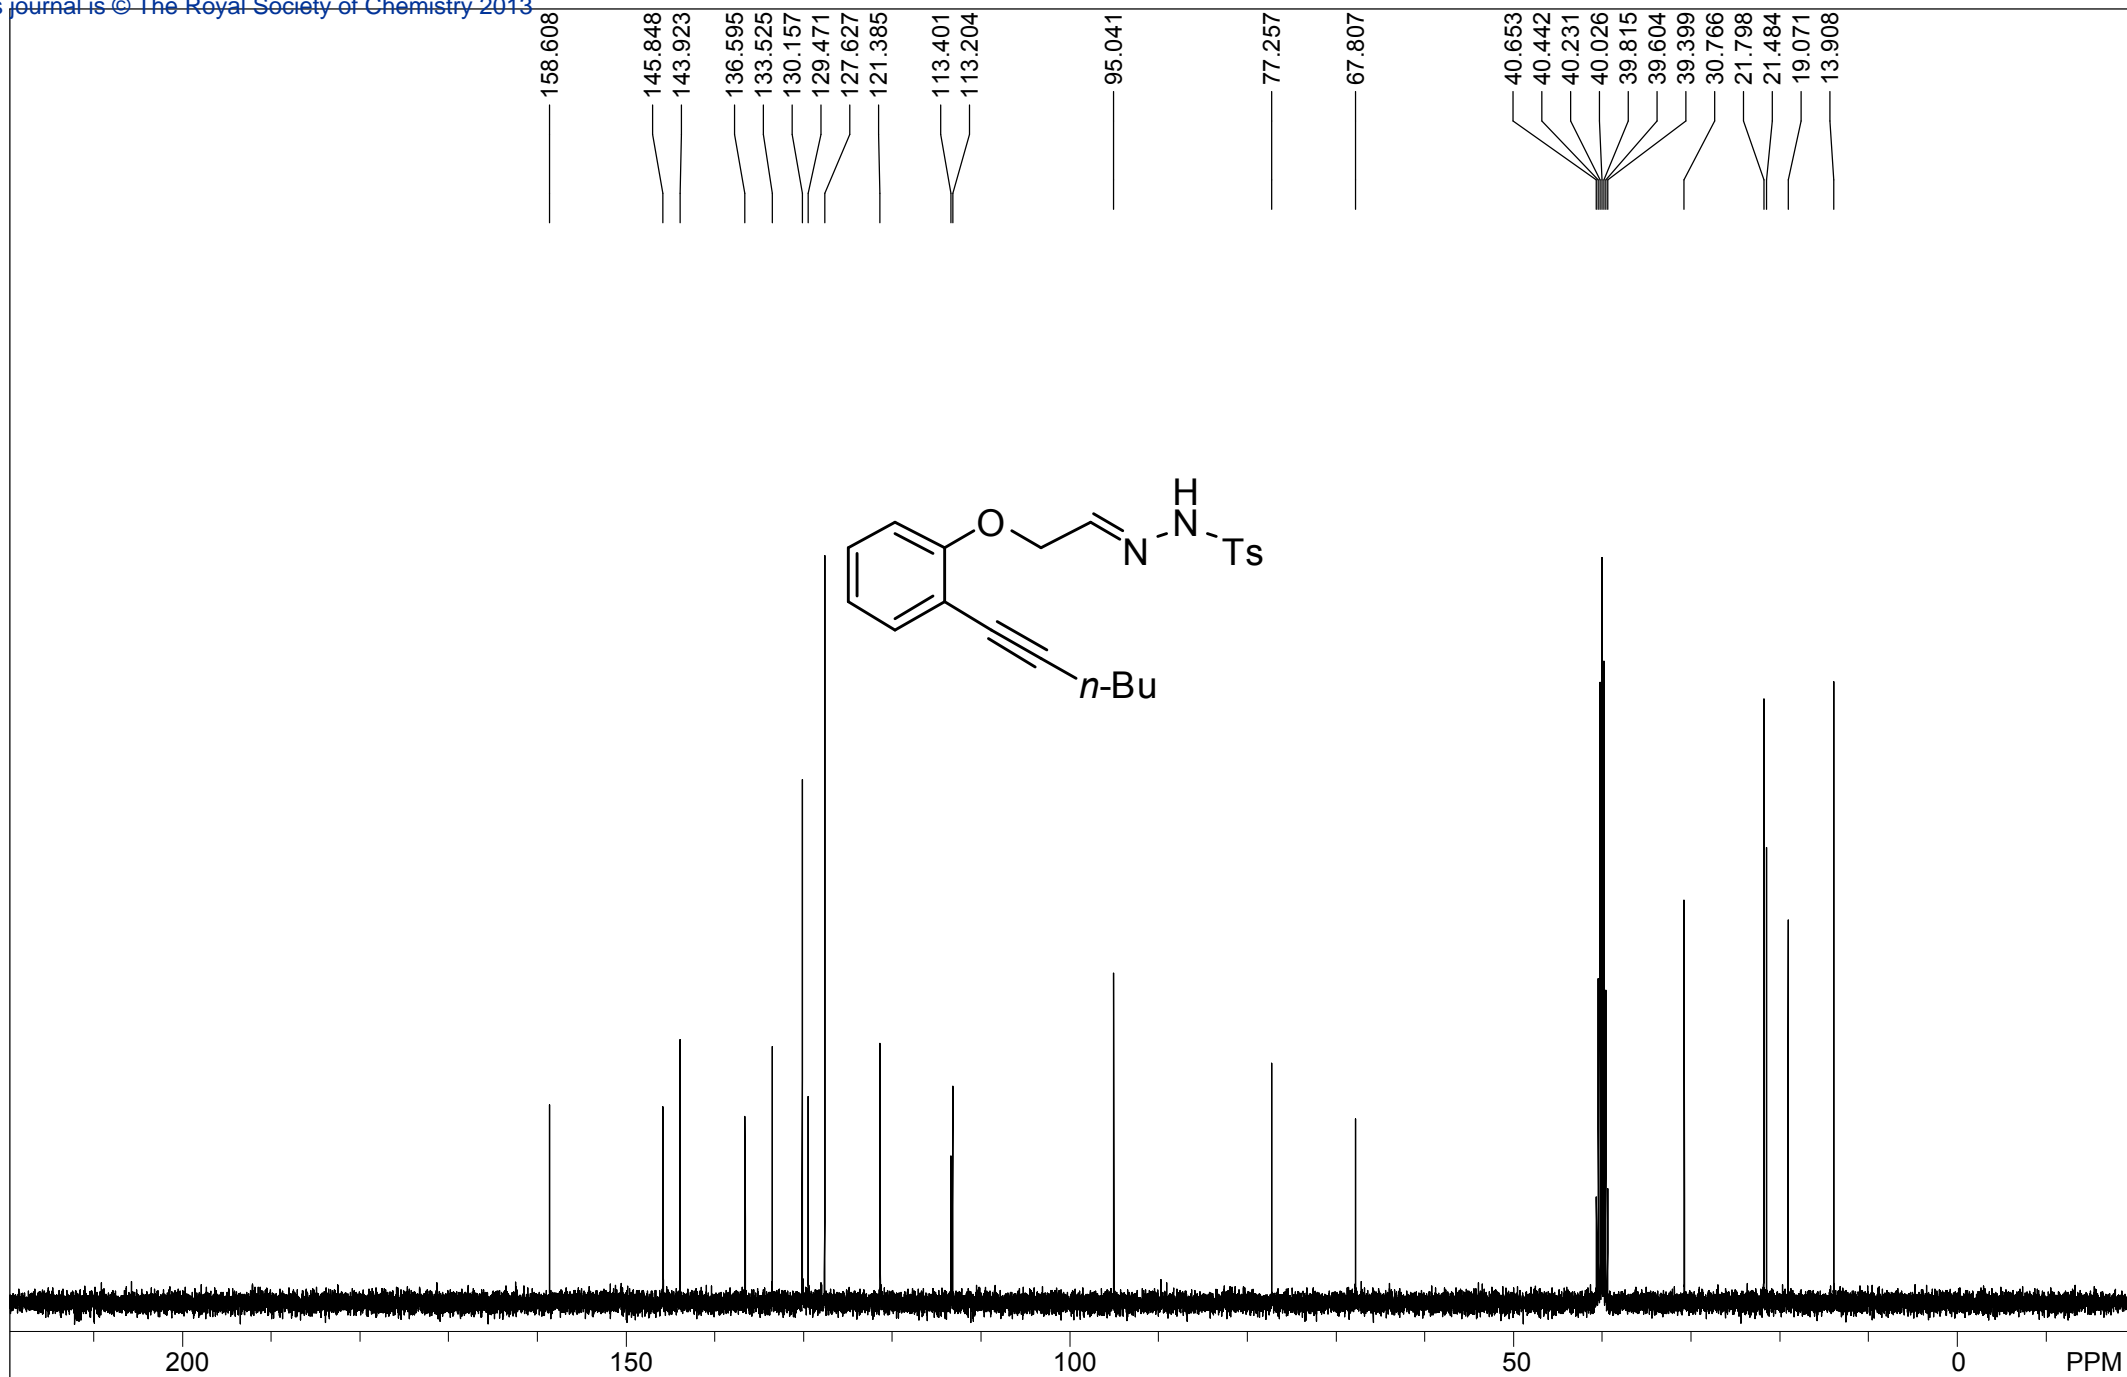

USER: Administr -- DATE: Thu Jun 30 23:03:54 2011

|             |            |             |              |                      |                     |
|-------------|------------|-------------|--------------|----------------------|---------------------|
| F1: 100.623 | F2: 1.000  | SW1: 24038  | OF1: 10063.0 | PTS1d: 32768 , 32768 |                     |
| EX: zgpg30  | PW: 9.5 us | PD: 2.0 sec | NA: 100      | LB: 0.0              | Nuts - \$GWQ-2075_6 |

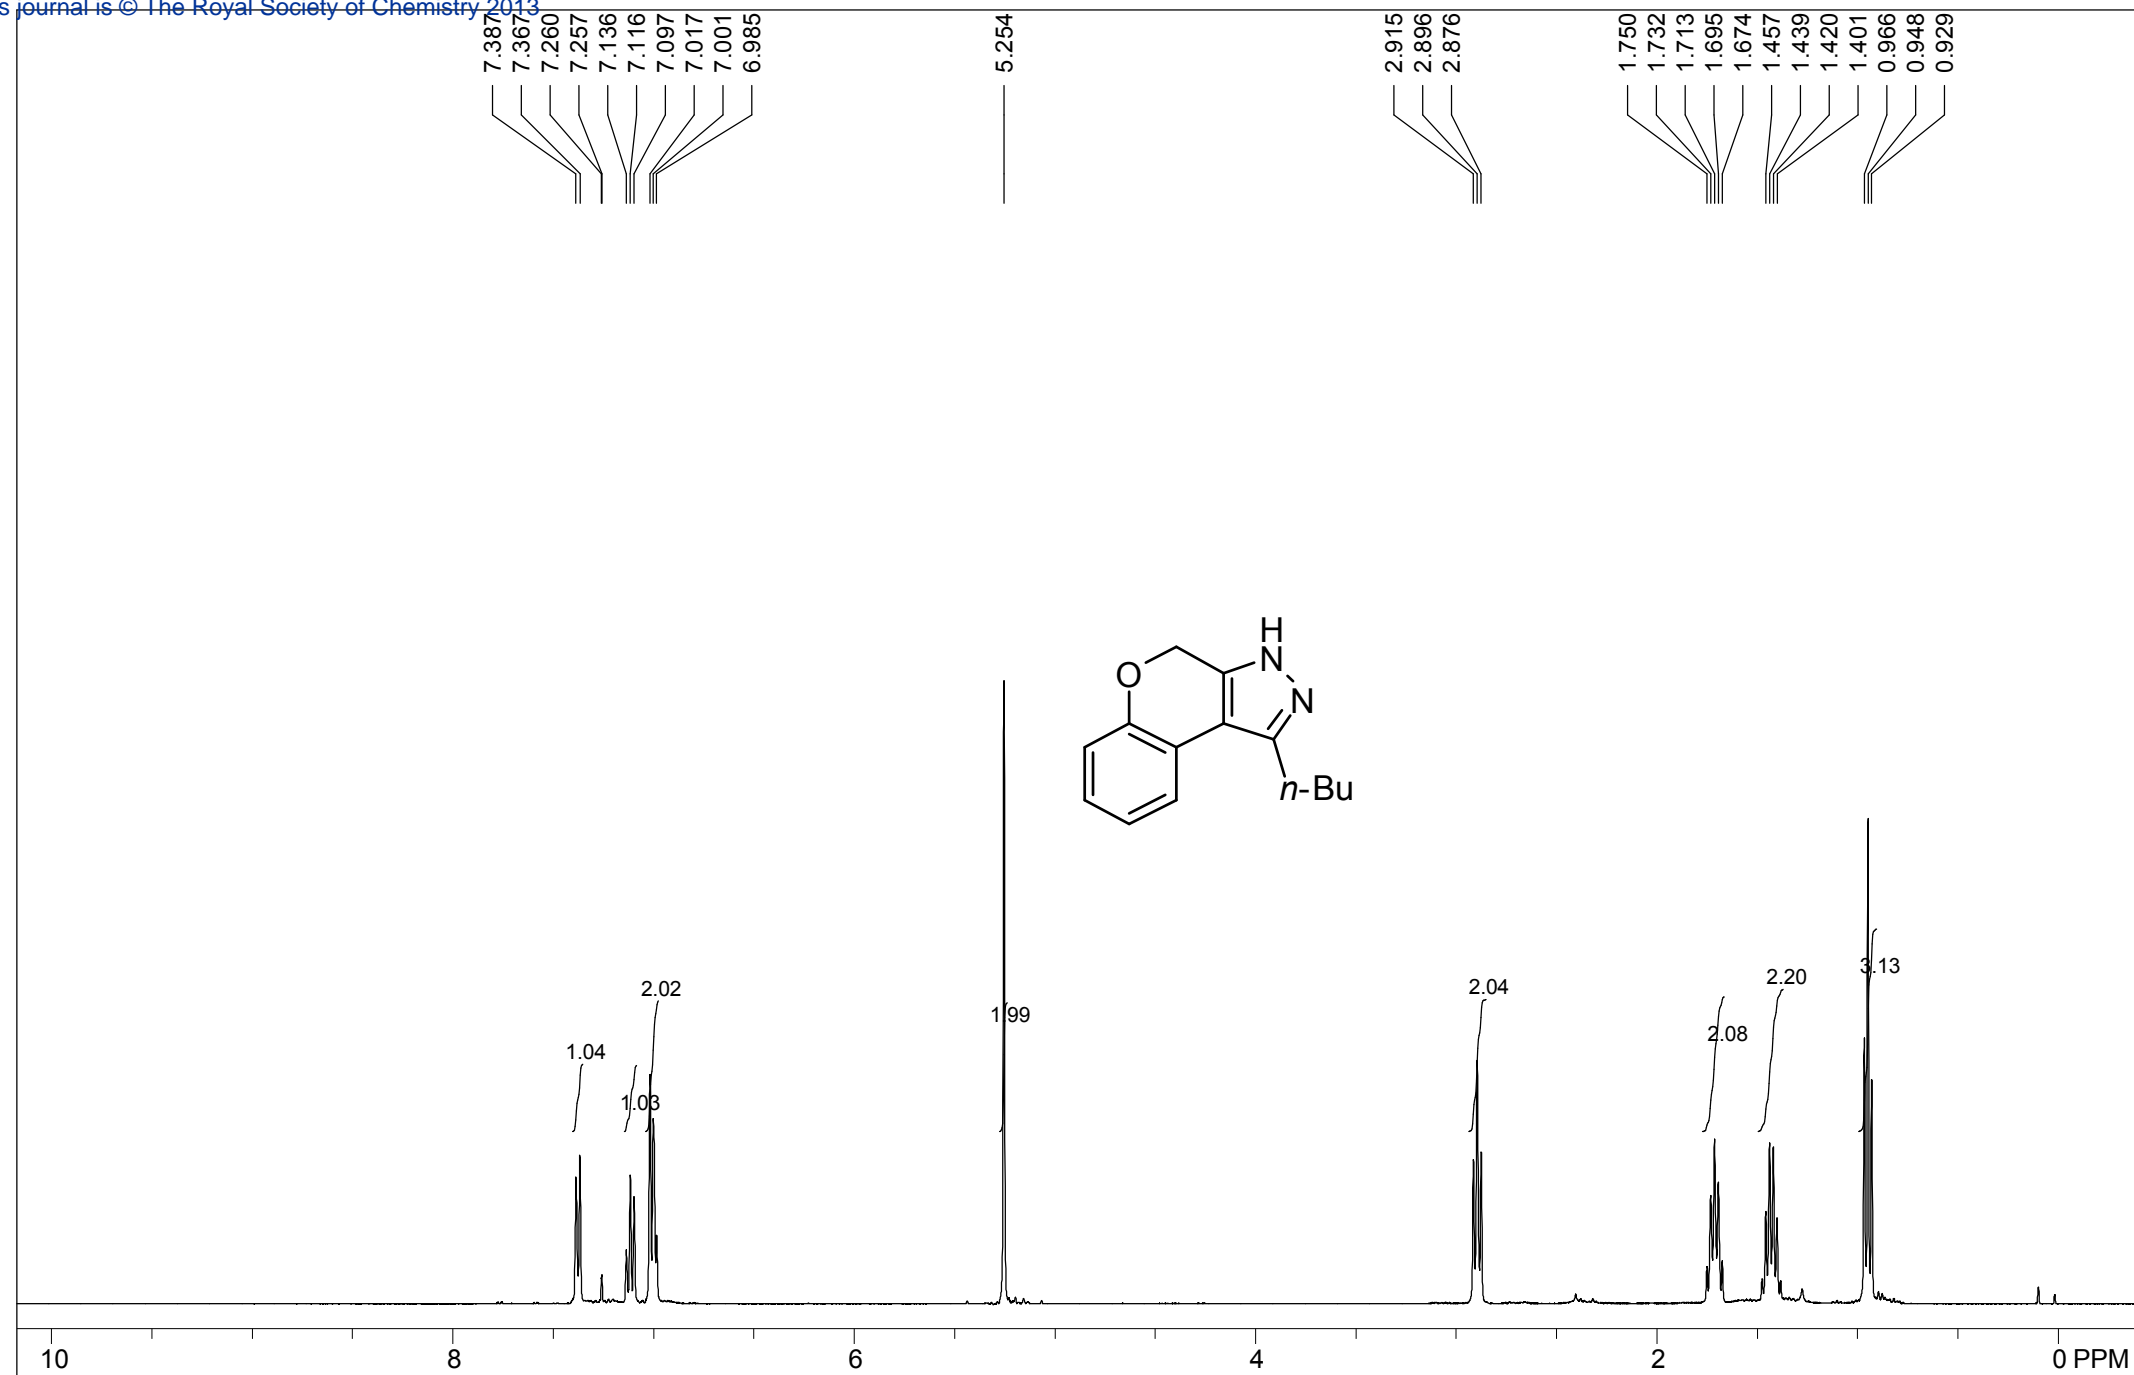

USER: Administr -- DATE: Fri Jul 08 09:48:22 2011

|             |           |             |             |             |         |                      |                     |
|-------------|-----------|-------------|-------------|-------------|---------|----------------------|---------------------|
| F1: 400.132 | F2: 1.000 | SW1: 8224   |             | OF1: 2460.6 |         | PTS1d: 32768 , 32768 |                     |
| EX: zg30    |           | PW: 13.6 us | PD: 1.0 sec | NA: 2       | LB: 0.0 |                      | Nuts - \$GWQ-2082_1 |

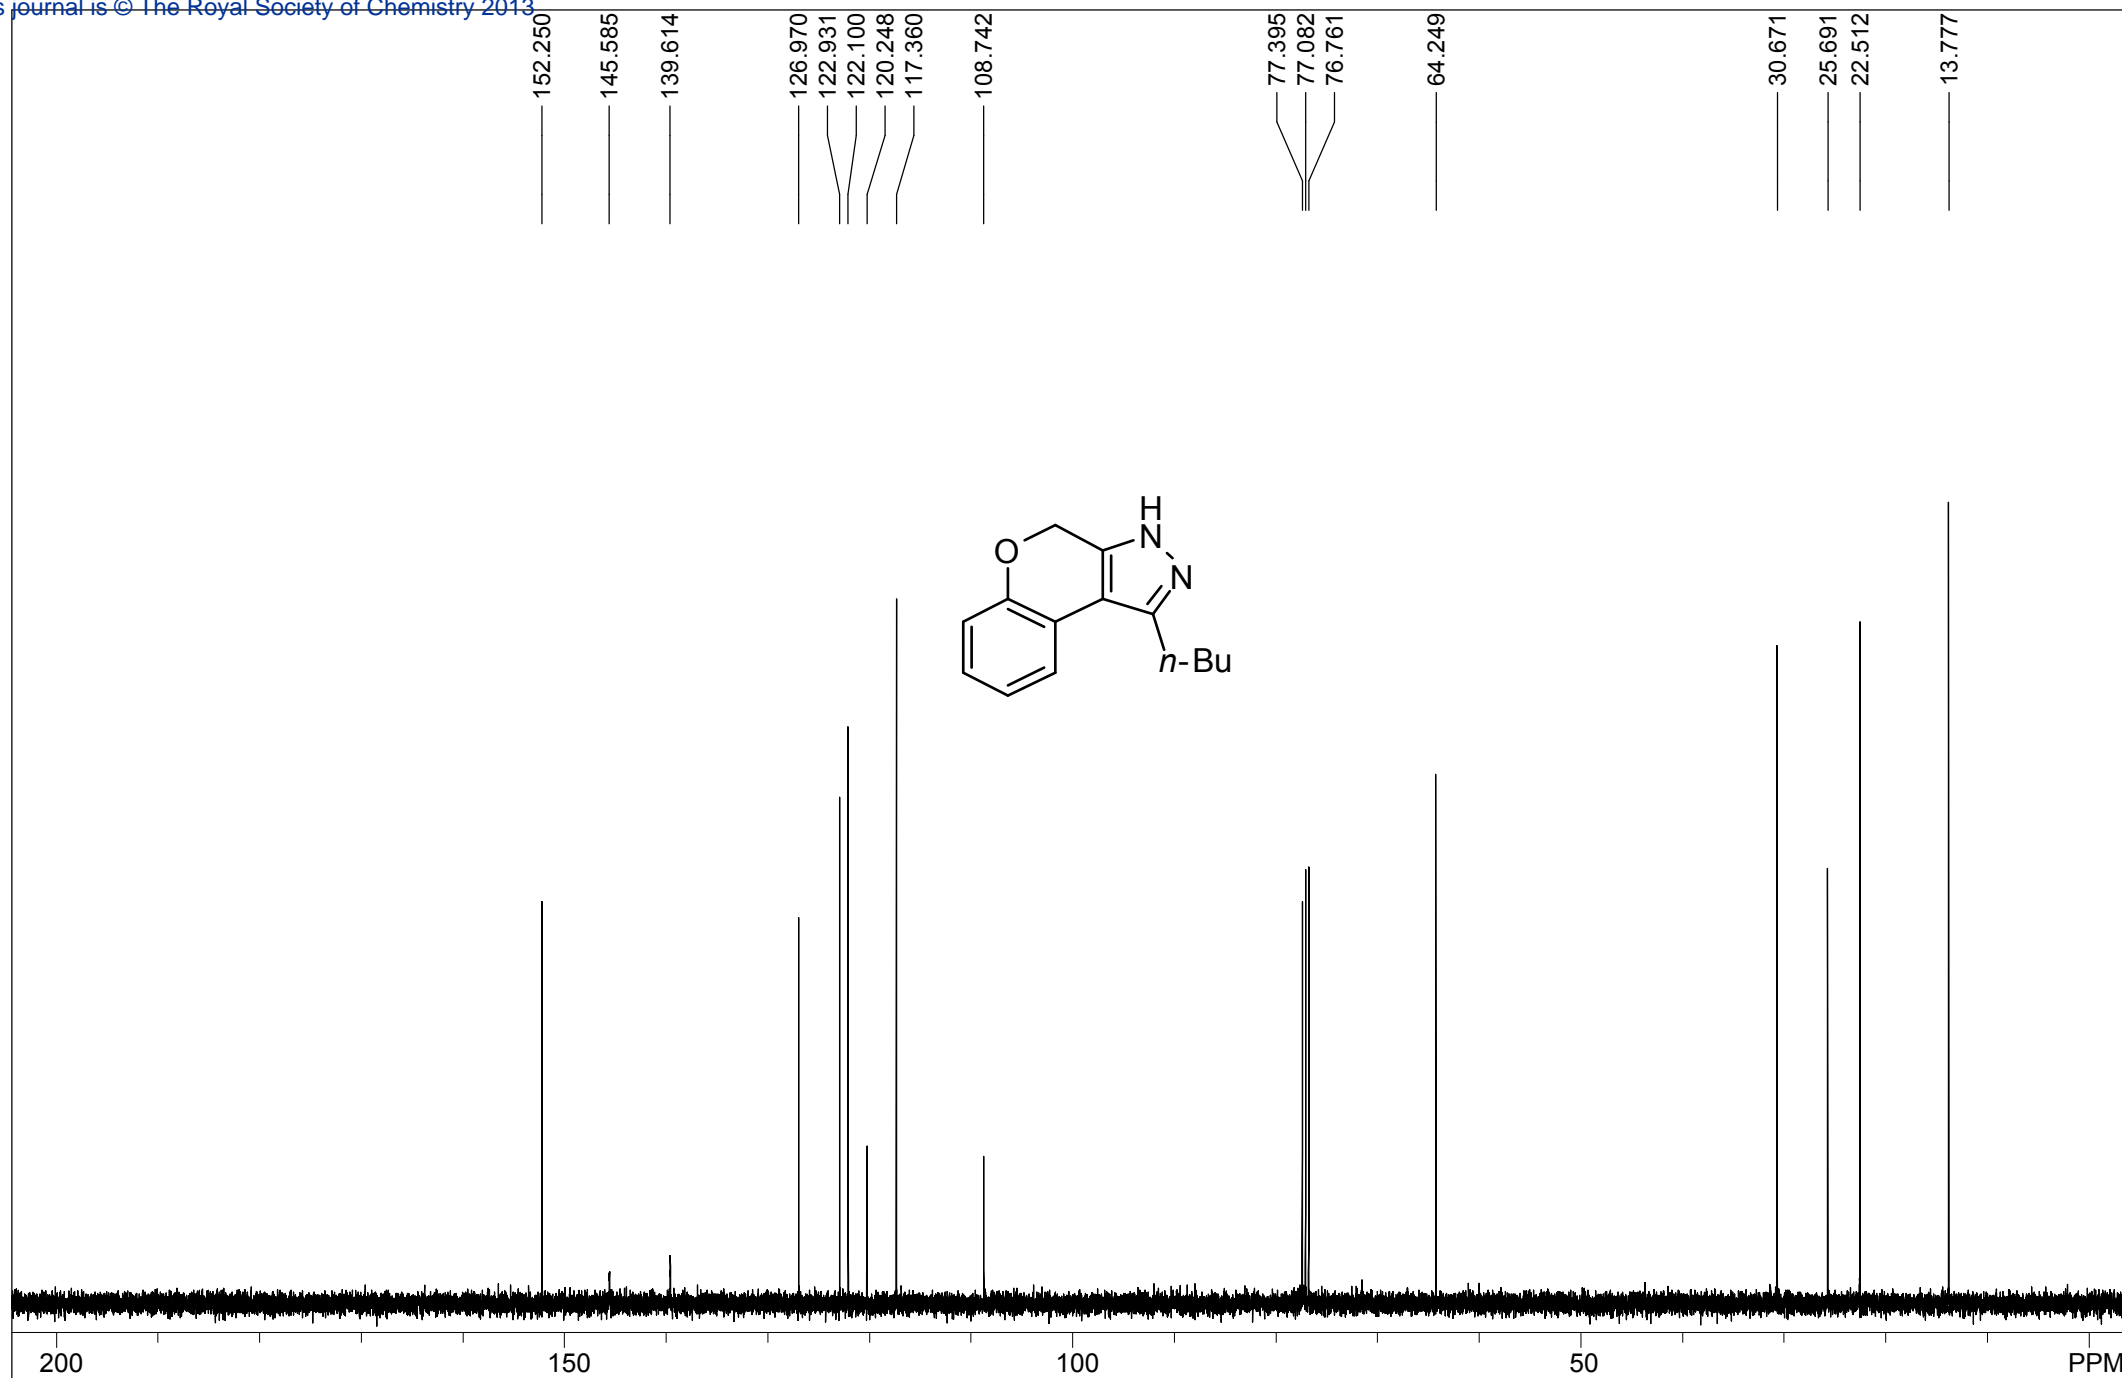

200

150

100

50

PPM

USER: Administr -- DATE: Fri Jul 08 13:13:14 2011

F1: 100.623

F2: 1.000

SW1: 24038

OF1: 10063.0

PTS1d: 32768 , 32768

EX: zgpg30

PW: 9.5 us

PD: 2.0 sec

NA: 100

LB: 0.0

Nuts - \$GWQ-2082\_3

7.519  
7.517  
7.476  
7.472  
7.460  
7.455  
7.277  
7.270  
7.255  
7.249  
7.154  
7.152  
7.132  
6.777  
6.755

4.717  
4.289  
4.271  
4.253  
4.236

2.355

1.304  
1.300  
1.286  
1.268

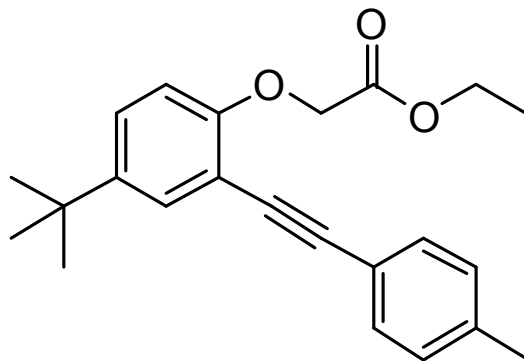

0.98  
2.00  
0.84  
1.99  
0.99

2.00  
2.00

3.00

11.22

8

6

4

2

PPM

USER: Administr -- DATE: Sat May 28 12:40:47 2011

F1: 400.132

F2: 1.000

SW1: 8224

OF1: 2456.9

PTS1d: 32768 , 32768

EX: zg30

PW: 13.6 us

PD: 1.0 sec

NA: 2

LB: 0.0

Nuts - \$GWQ-2052\_1

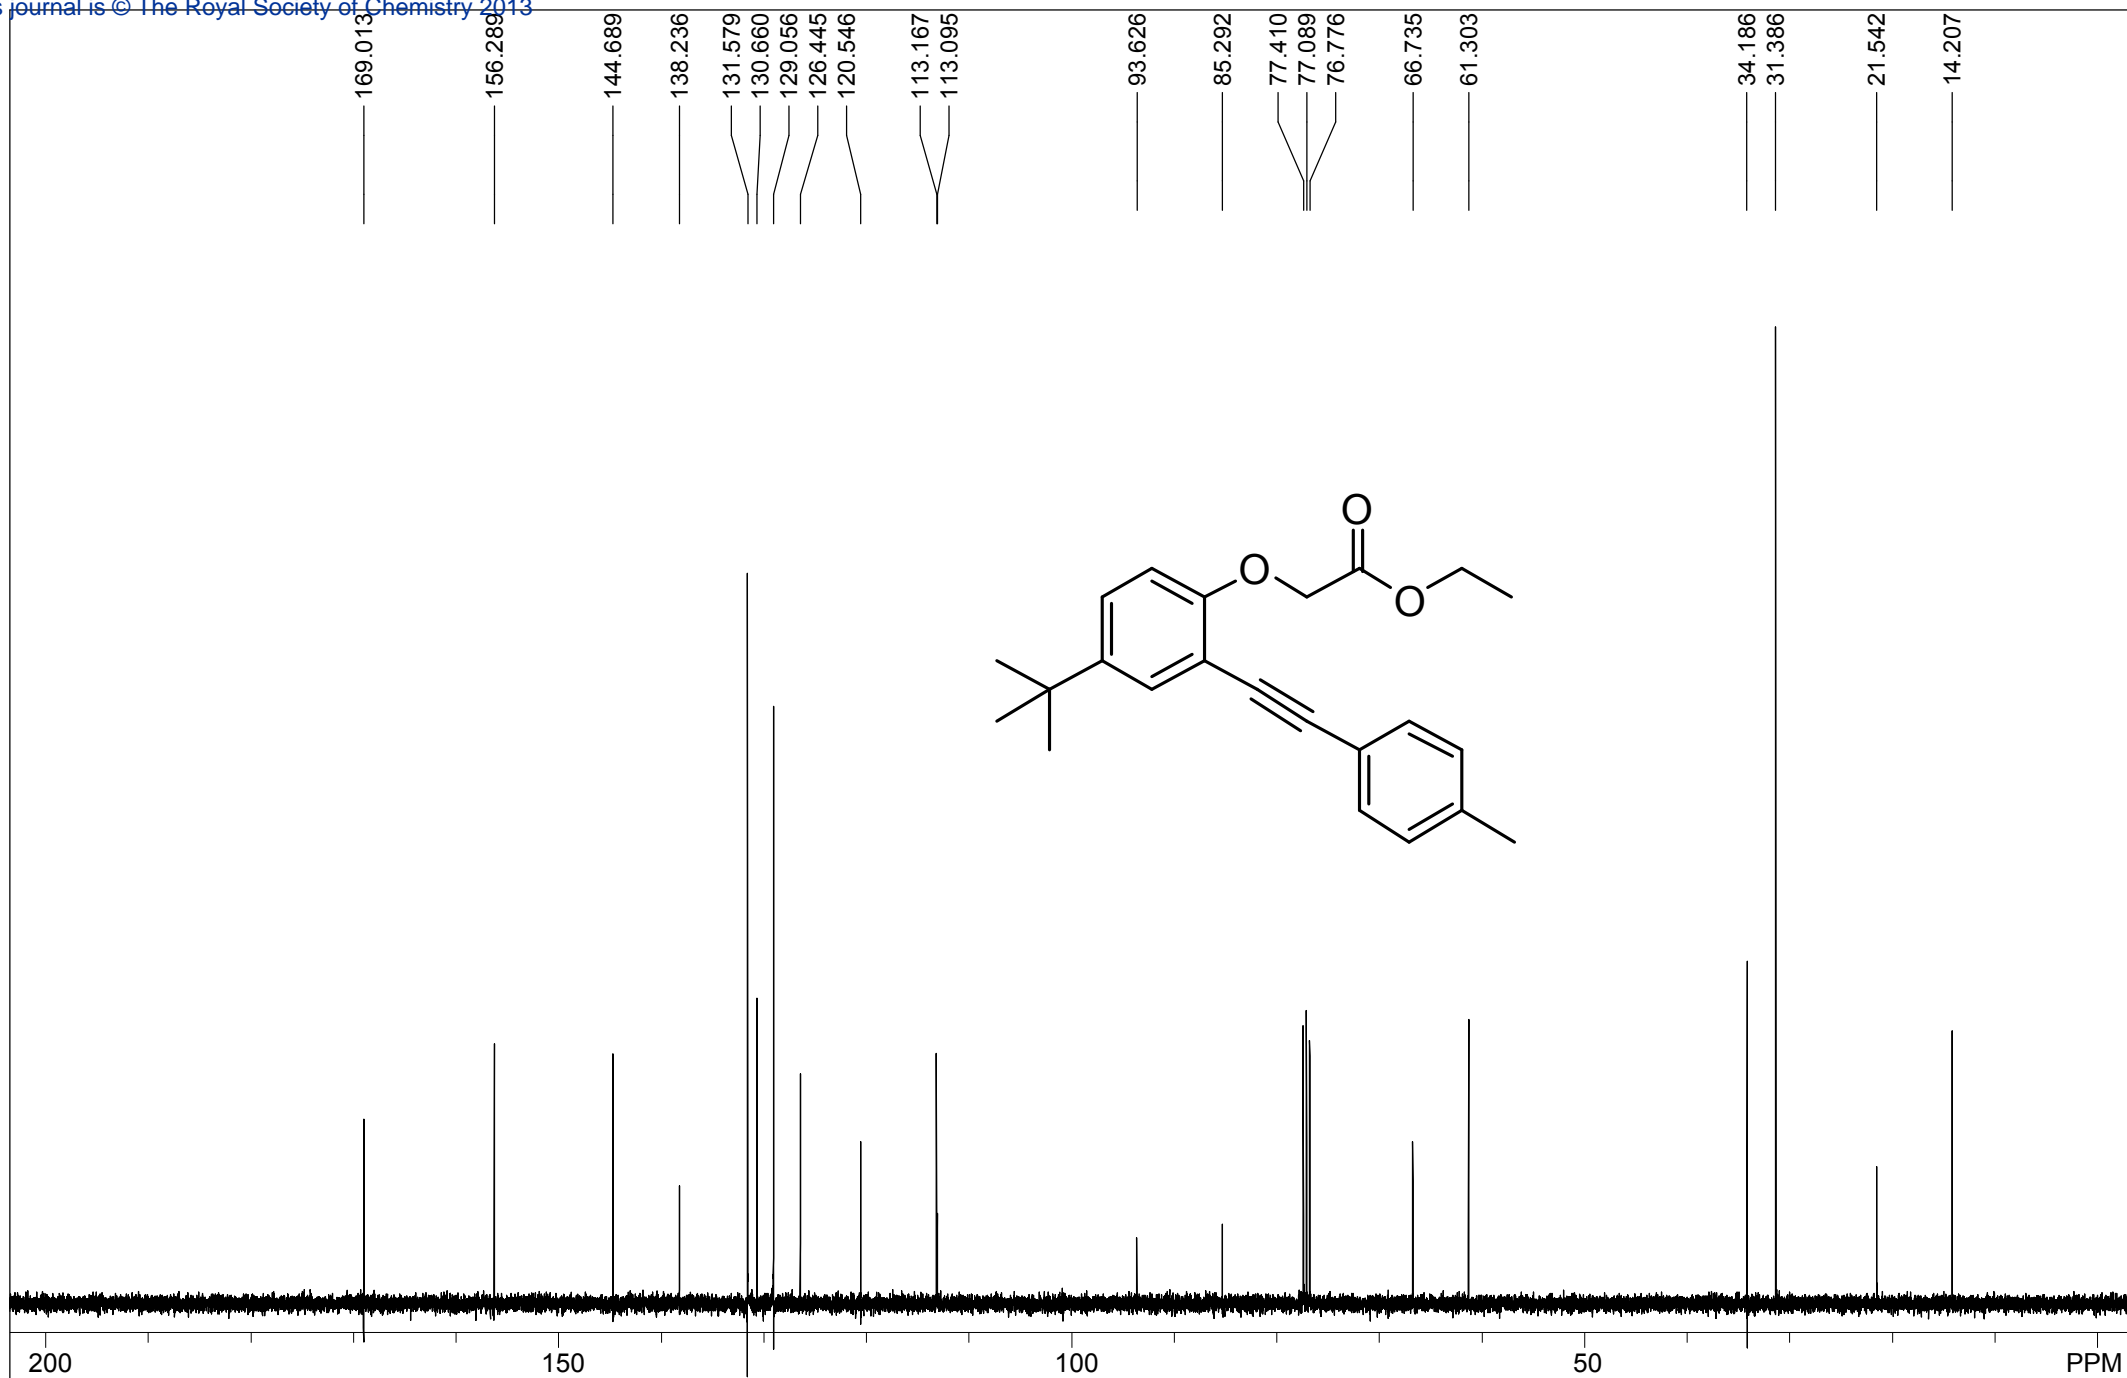

|                                                   |           |            |             |              |         |                      |  |                     |
|---------------------------------------------------|-----------|------------|-------------|--------------|---------|----------------------|--|---------------------|
| 200                                               |           | 150        |             | 100          |         | 50                   |  | PPM                 |
| USER: Administr -- DATE: Sun May 29 09:56:25 2011 |           |            |             |              |         |                      |  |                     |
| F1: 100.623                                       | F2: 1.000 | SW1: 24038 |             | OF1: 10063.0 |         | PTS1d: 32768 , 32768 |  |                     |
| EX: zgpg30                                        |           | PW: 9.5 us | PD: 2.0 sec | NA: 81       | LB: 0.0 |                      |  | Nuts - \$GWQ-2052_7 |

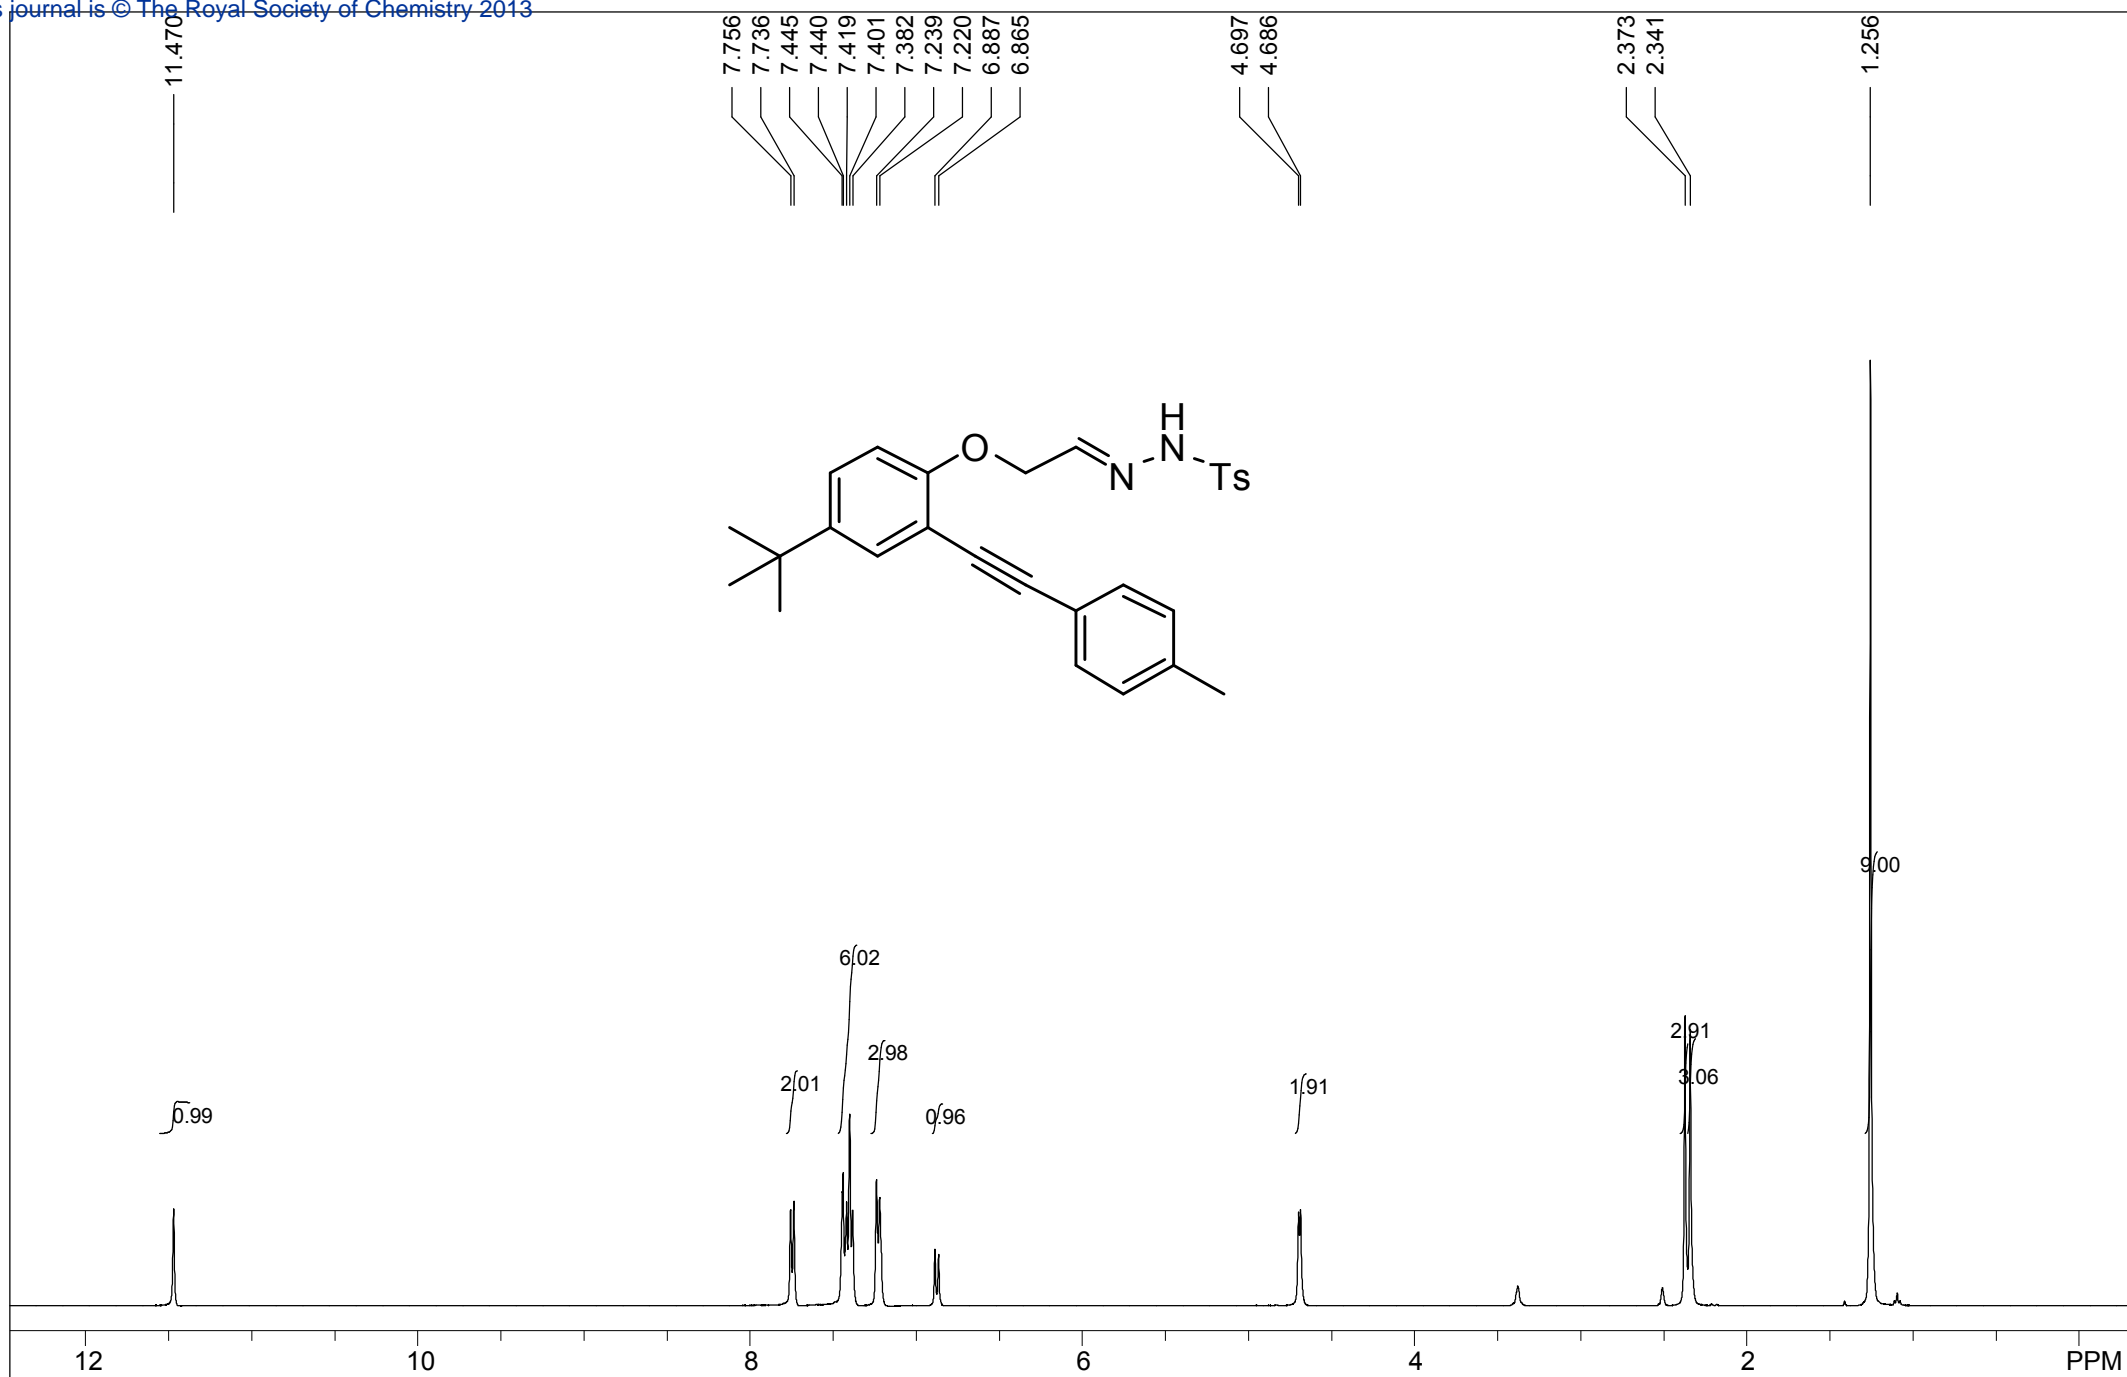

USER: Administr -- DATE: Wed Aug 24 23:15:58 2011

|             |           |             |             |             |         |                      |                     |
|-------------|-----------|-------------|-------------|-------------|---------|----------------------|---------------------|
| F1: 400.132 | F2: 1.000 | SW1: 8224   |             | OF1: 2471.0 |         | PTS1d: 32768 , 32768 |                     |
| EX: zg30    |           | PW: 13.6 us | PD: 1.0 sec | NA: 2       | LB: 0.0 |                      | Nuts - \$GWQ-2057_2 |

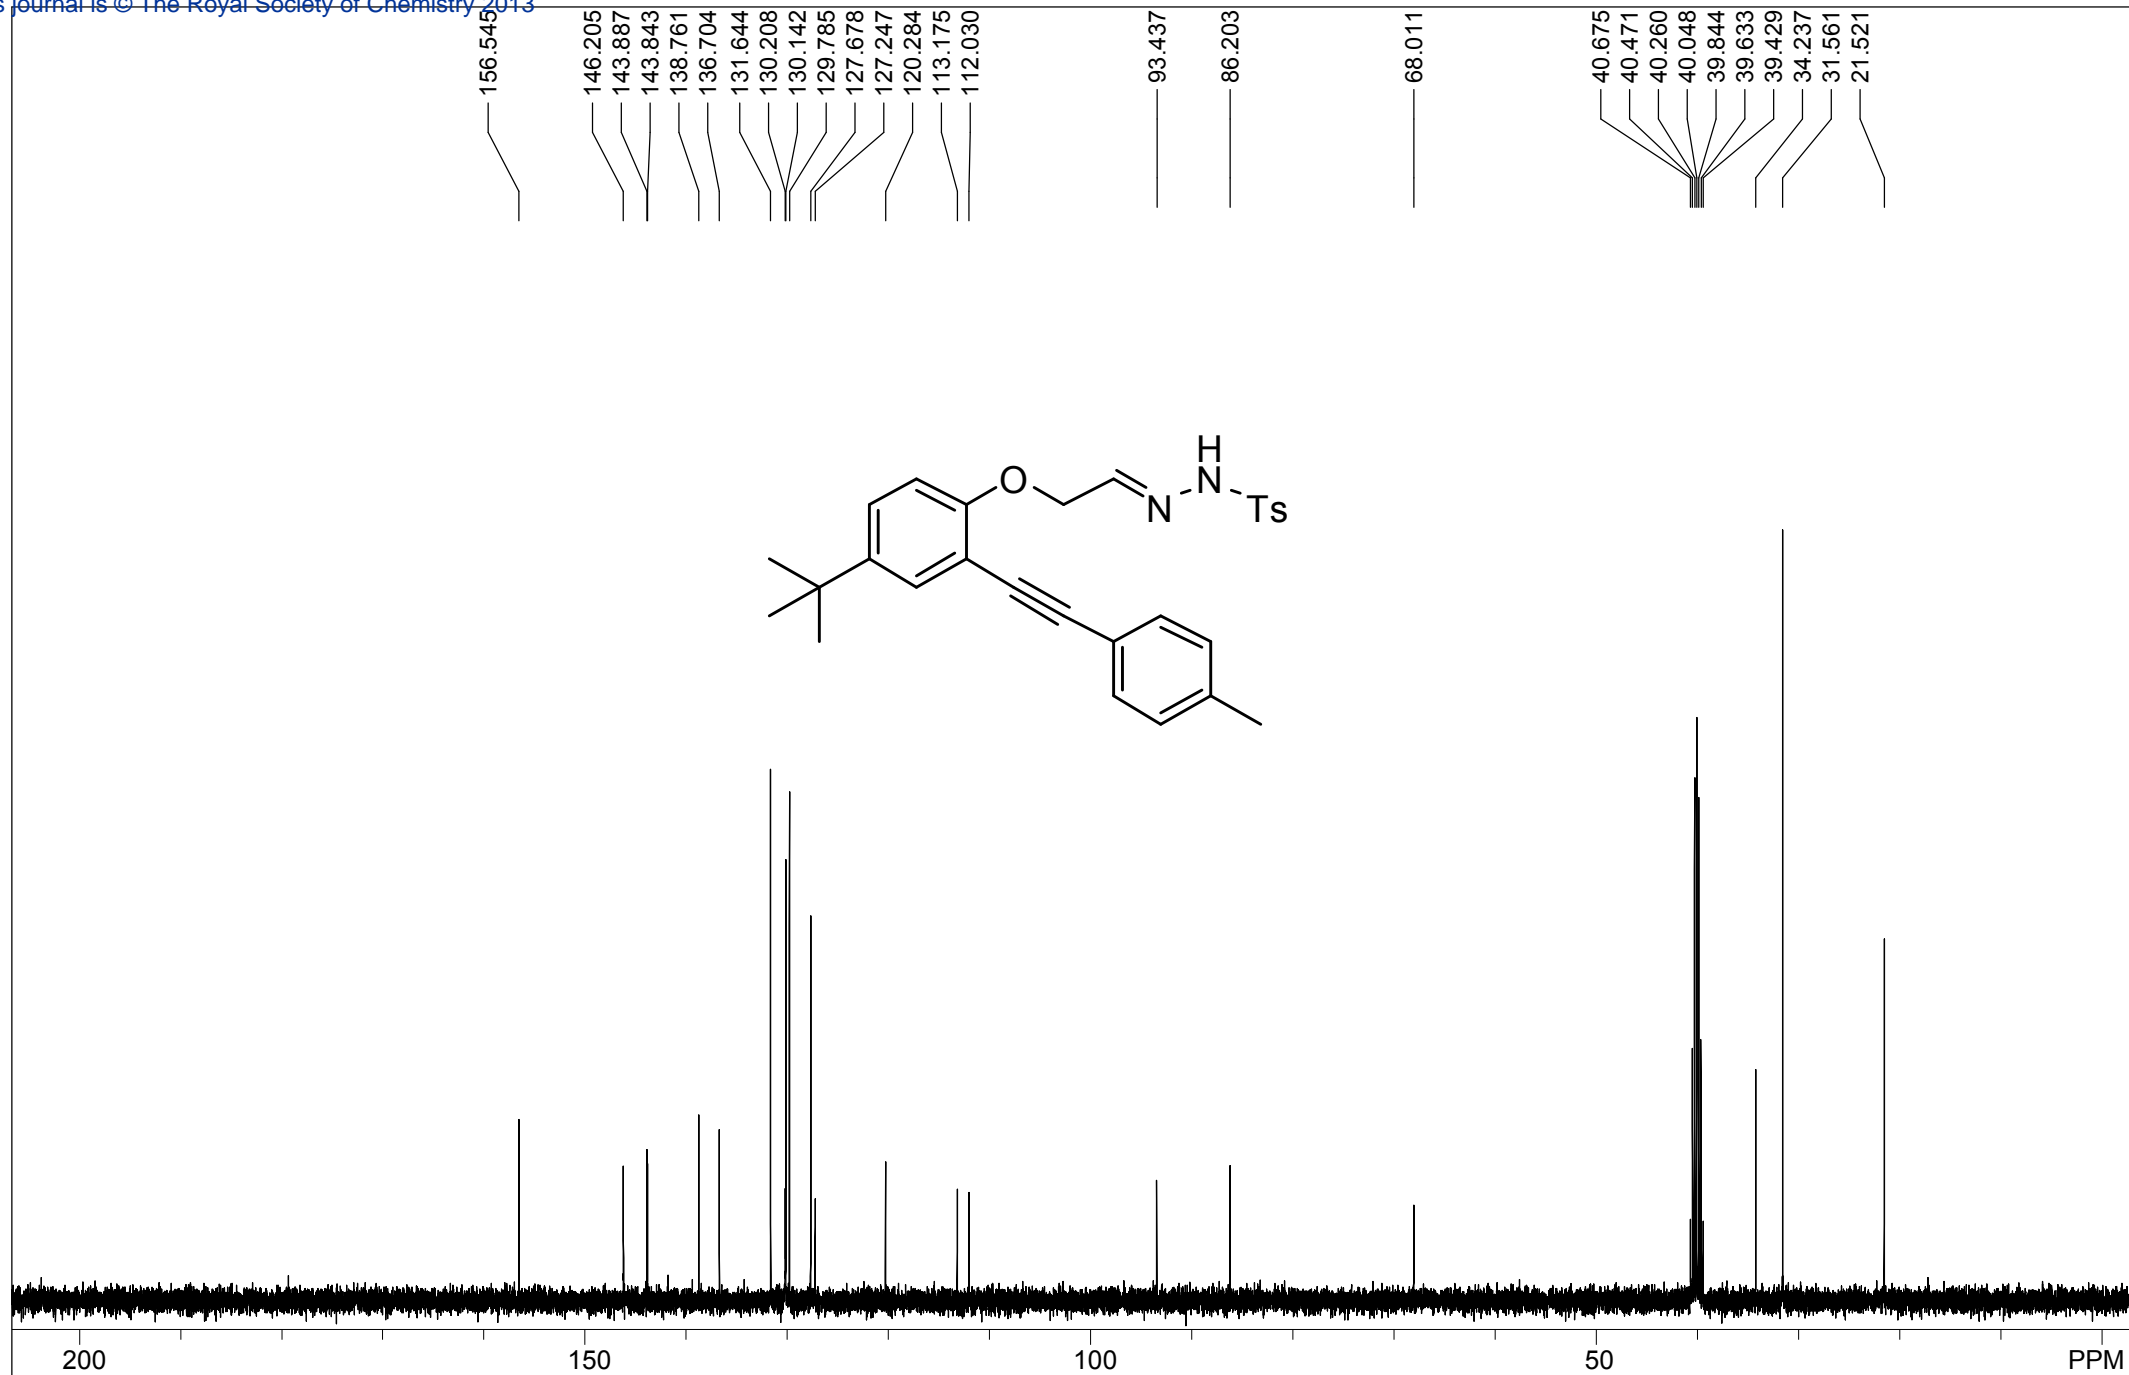

USER: Administr -- DATE: Wed Aug 24 23:19:37 2011

|             |            |             |              |                      |                     |
|-------------|------------|-------------|--------------|----------------------|---------------------|
| F1: 100.623 | F2: 1.000  | SW1: 24038  | OF1: 10063.0 | PTS1d: 32768 , 32768 |                     |
| EX: zgpg30  | PW: 9.5 us | PD: 2.0 sec | NA: 50       | LB: 0.0              | Nuts - \$GWQ-2057_3 |



7.560  
7.540  
7.477  
7.466  
7.316  
7.296  
7.260  
7.147  
7.141  
7.126  
7.120  
6.950  
6.928

4.962

2.459

1.208

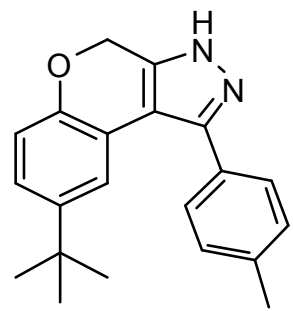

1.95 1.93  
0.90 0.94 0.93

1.84

3.00

9.04

8

6

4

2

0 PPM

USER: Administr -- DATE: Tue Jun 07 11:15:04 2011

|             |           |             |             |             |         |                      |                     |
|-------------|-----------|-------------|-------------|-------------|---------|----------------------|---------------------|
| F1: 400.132 | F2: 1.000 | SW1: 8224   |             | OF1: 2461.3 |         | PTS1d: 32768 , 32768 |                     |
| EX: zg30    |           | PW: 13.6 us | PD: 1.0 sec | NA: 2       | LB: 0.0 |                      | Nuts - \$GWQ-2058_1 |

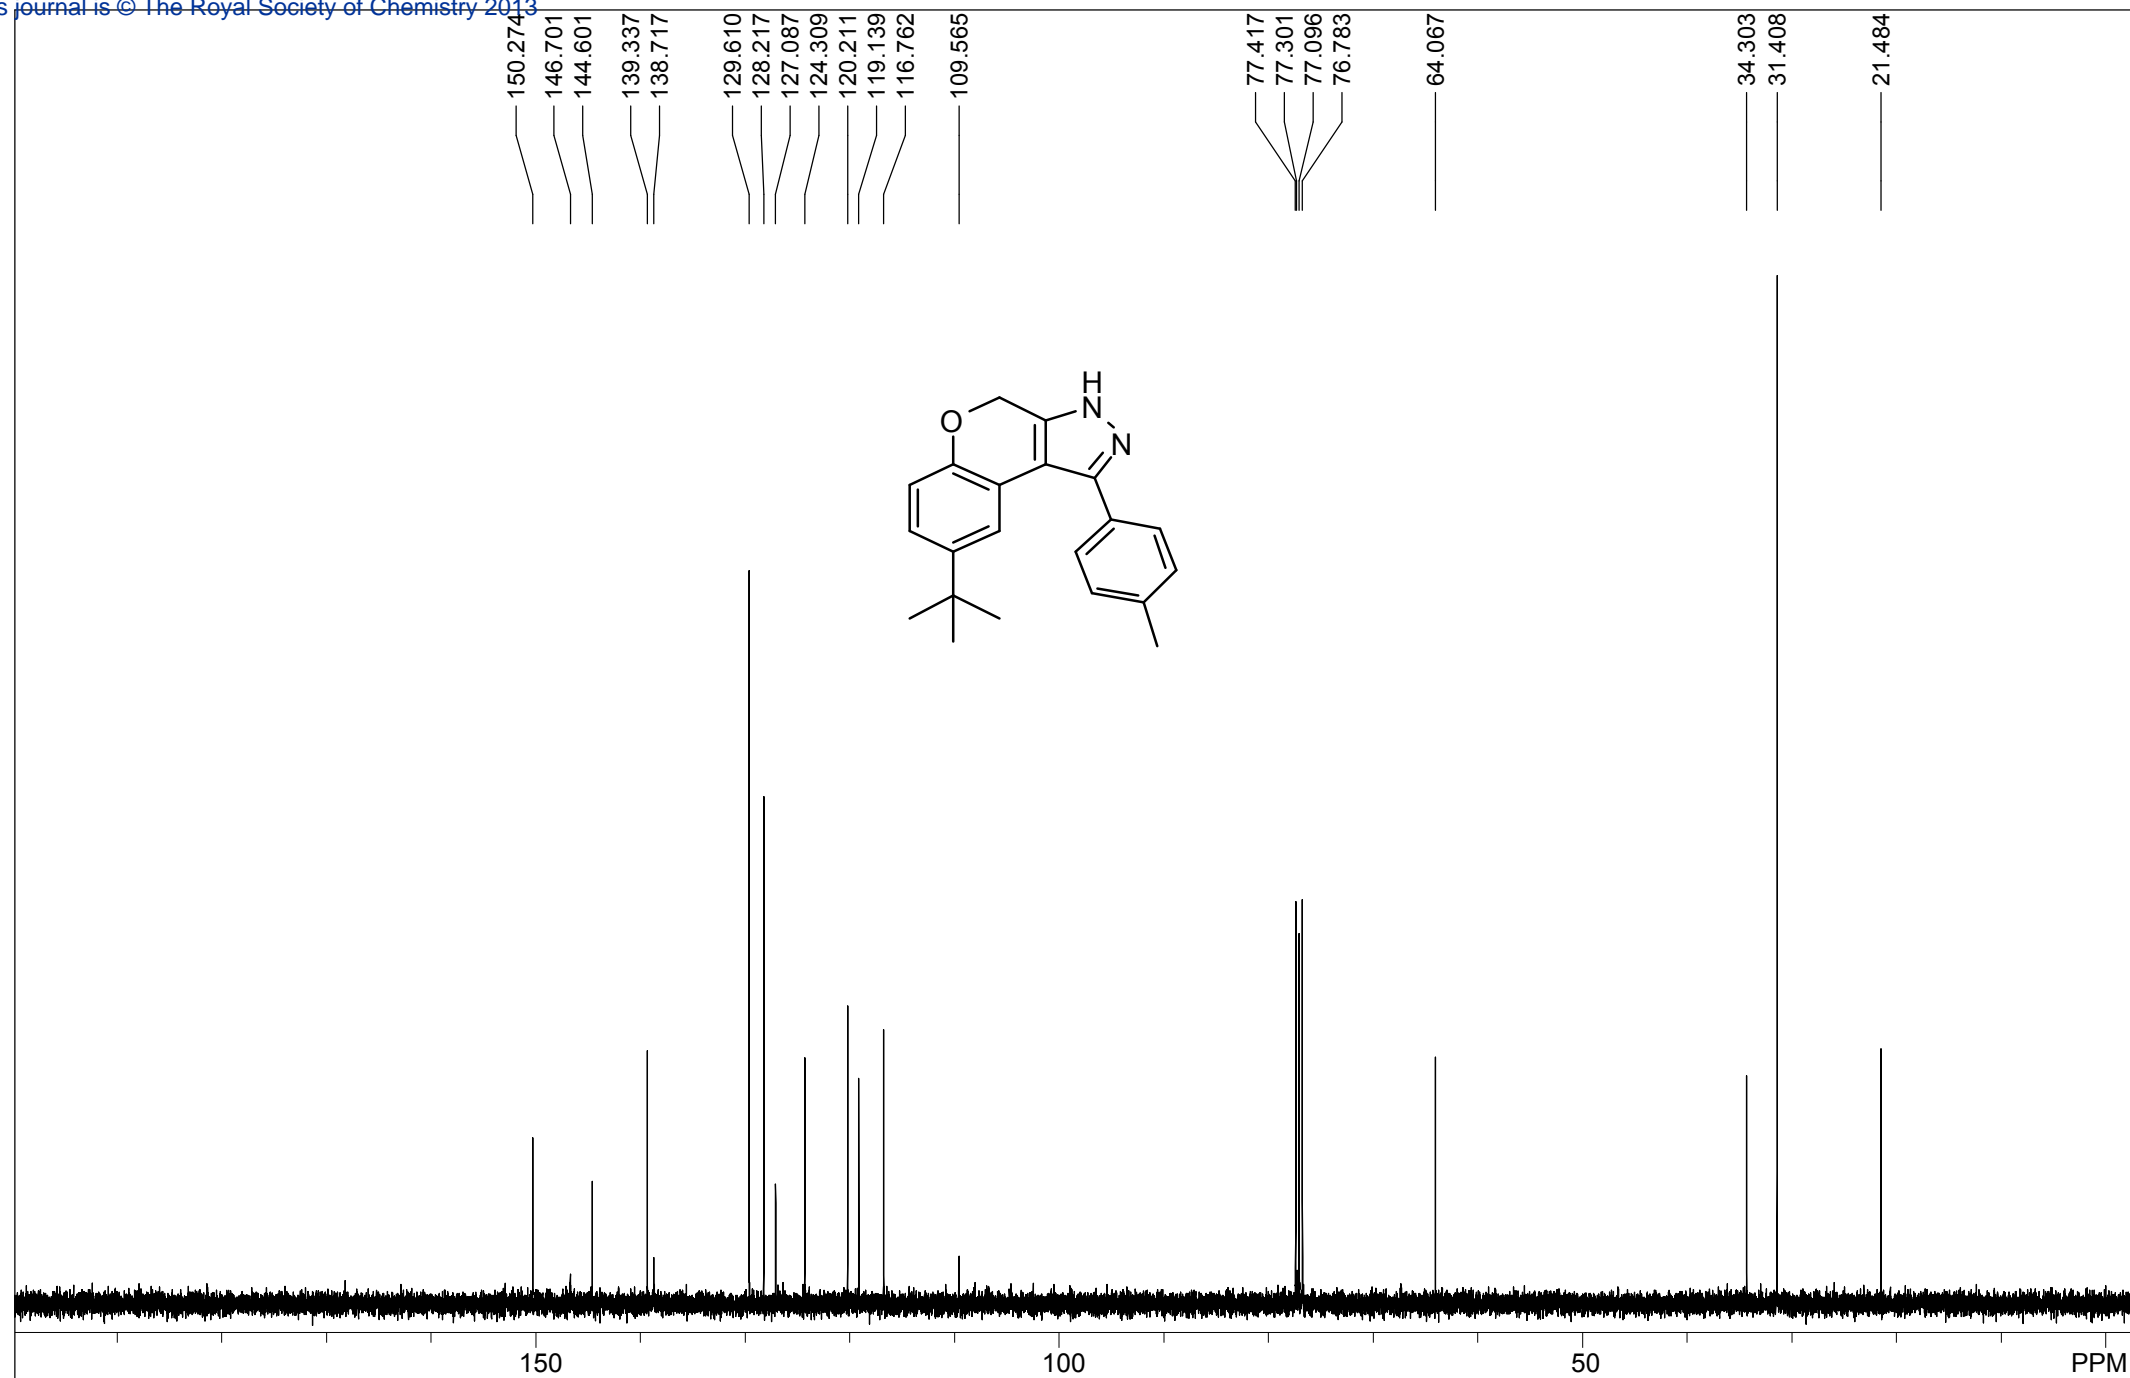

|             |  |            |  |             |  |              |  |                      |  |                                                   |  |
|-------------|--|------------|--|-------------|--|--------------|--|----------------------|--|---------------------------------------------------|--|
| F1: 100.623 |  | F2: 1.000  |  | SW1: 24038  |  | OF1: 10063.0 |  | PTS1d: 32768 , 32768 |  | USER: Administr -- DATE: Tue Jun 07 11:19:27 2011 |  |
| EX: zgpg30  |  | PW: 9.5 us |  | PD: 2.0 sec |  | NA: 50       |  | LB: 0.0              |  | Nuts - \$GWQ-2058_2                               |  |

7.520  
7.512  
7.506  
7.503  
7.497  
7.263  
7.257  
7.241  
7.235  
6.872  
6.867  
6.855  
6.850  
6.767  
6.745

4.709  
4.277  
4.260  
4.241  
4.224  
3.792

1.295  
1.275  
1.265  
1.257

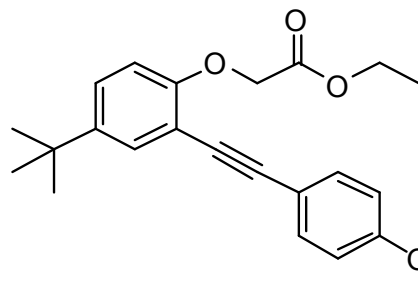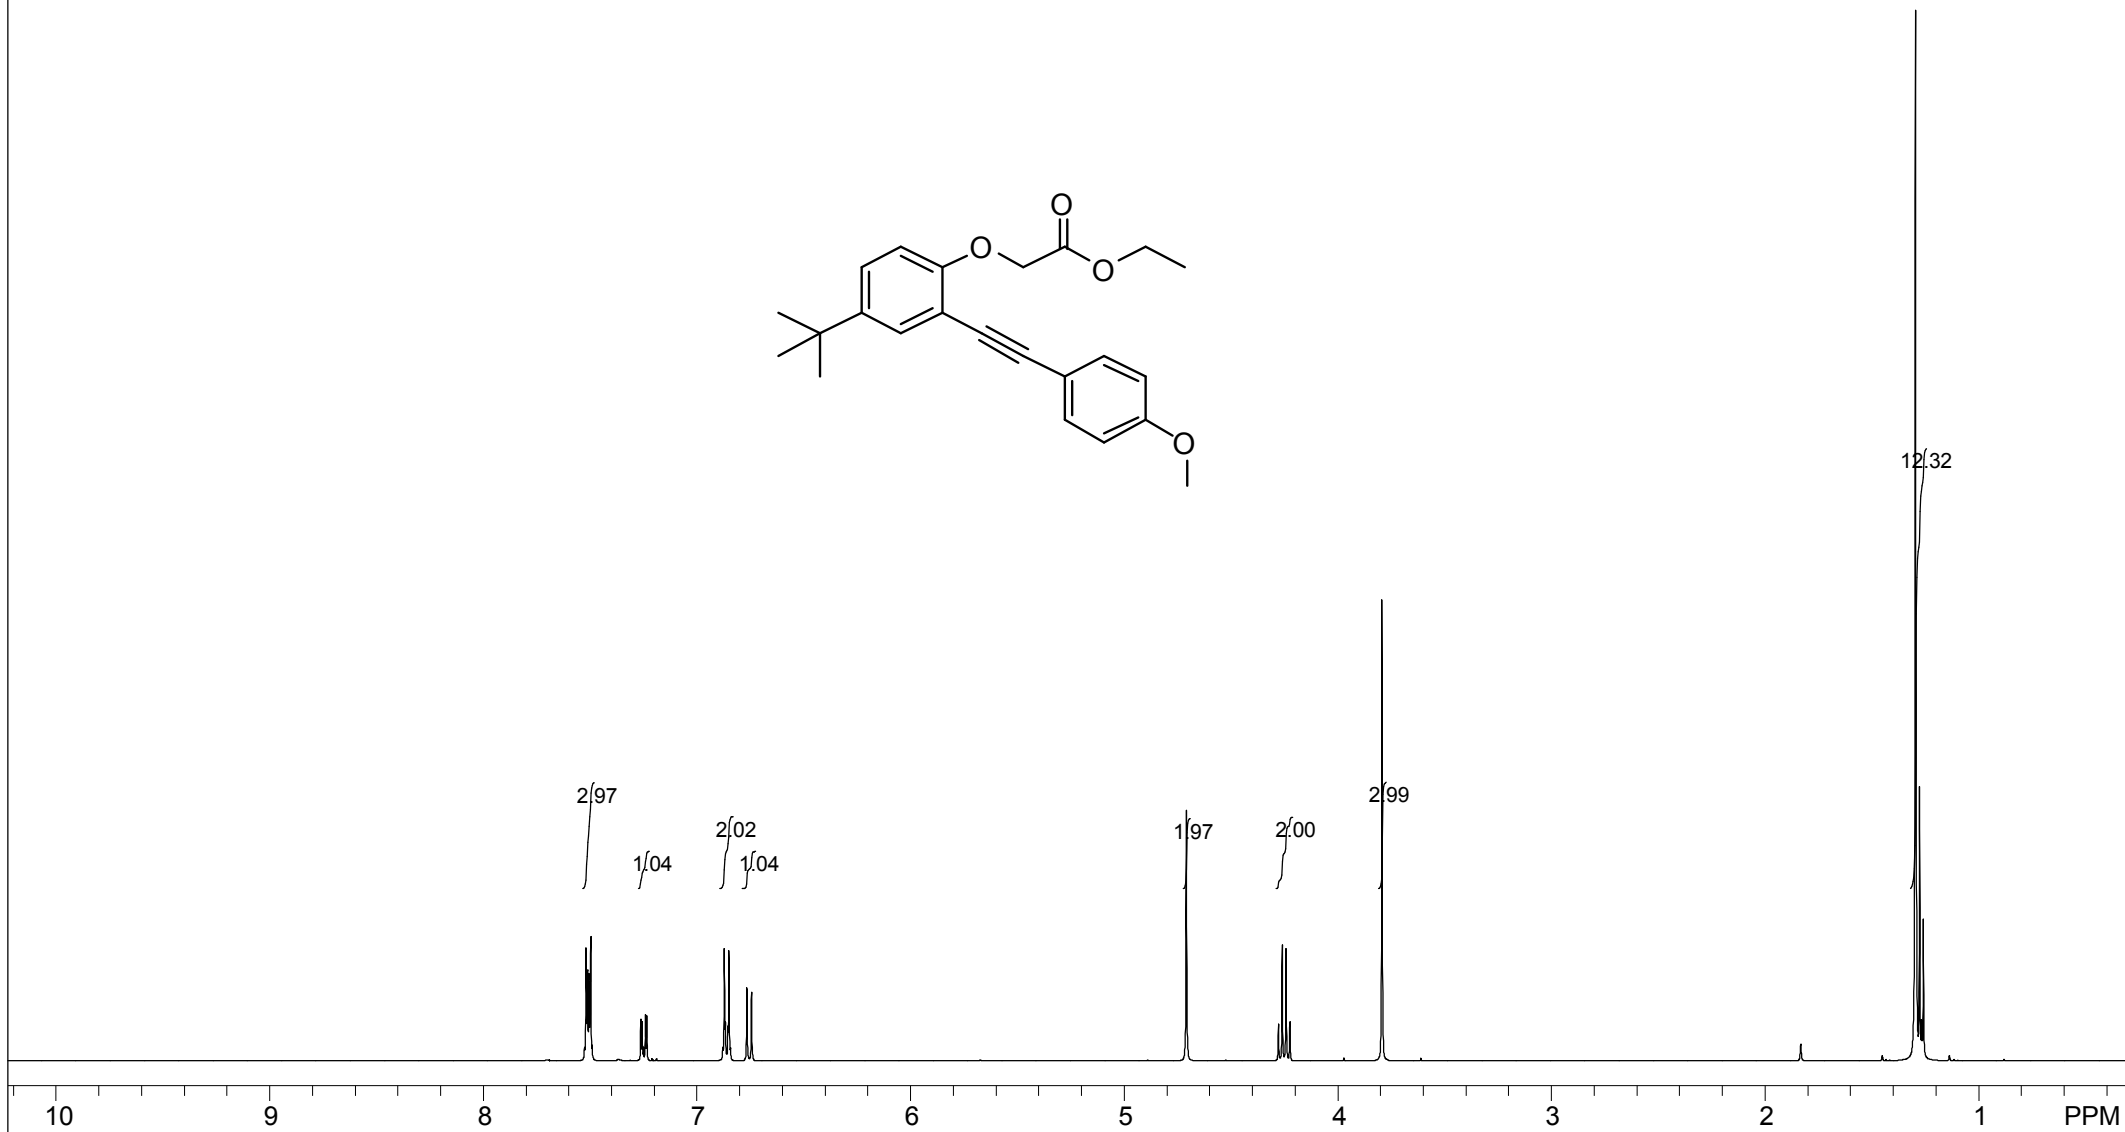

PROTON CDCl3 {D:\data\research\2011-6-21} nmr 9, ,

USER: nmr -- DATE: Tue Jun 21 15:57:21 2011

|             |           |             |             |             |         |                      |                      |
|-------------|-----------|-------------|-------------|-------------|---------|----------------------|----------------------|
| F1: 400.132 | F2: 1.000 | SW1: 8224   |             | OF1: 2457.4 |         | PTS1d: 32768 , 32768 |                      |
| EX: zg30    |           | PW: 14.9 us | PD: 1.0 sec | NA: 16      | LB: 0.0 |                      | Nuts - \$GWQ-2063_10 |

168.996  
159.585  
156.216  
144.645  
133.124  
130.536  
126.292  
115.756  
113.955  
113.204  
113.095  
93.459  
84.636  
77.476  
77.155  
76.841  
66.662  
61.288  
55.288  
34.171  
31.393  
14.207

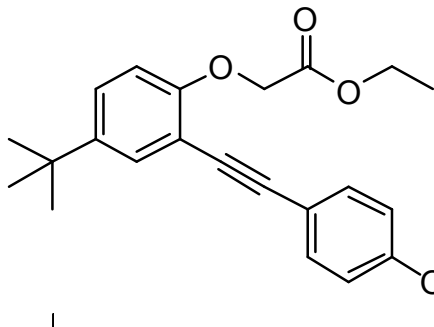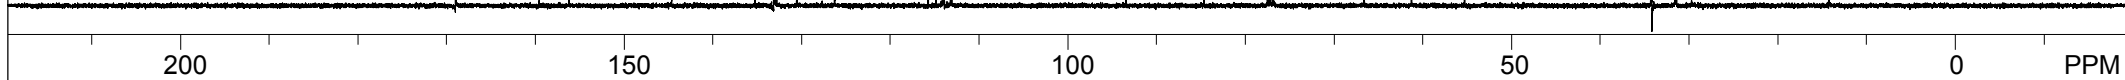

|                                                    |           |            |             |                                             |         |                      |                      |
|----------------------------------------------------|-----------|------------|-------------|---------------------------------------------|---------|----------------------|----------------------|
| C13CPD CDCI3 {D:\data\research\2011-6-21} nmr 9, , |           |            |             | USER: nmr -- DATE: Tue Jun 21 16:21:16 2011 |         |                      |                      |
| F1: 100.623                                        | F2: 1.000 | SW1: 24038 |             | OF1: 10063.0                                |         | PTS1d: 32768 , 32768 |                      |
| EX: zgpg30                                         |           | PW: 9.0 us | PD: 2.0 sec | NA: 400                                     | LB: 0.0 |                      | Nuts - \$GWQ-2063_11 |

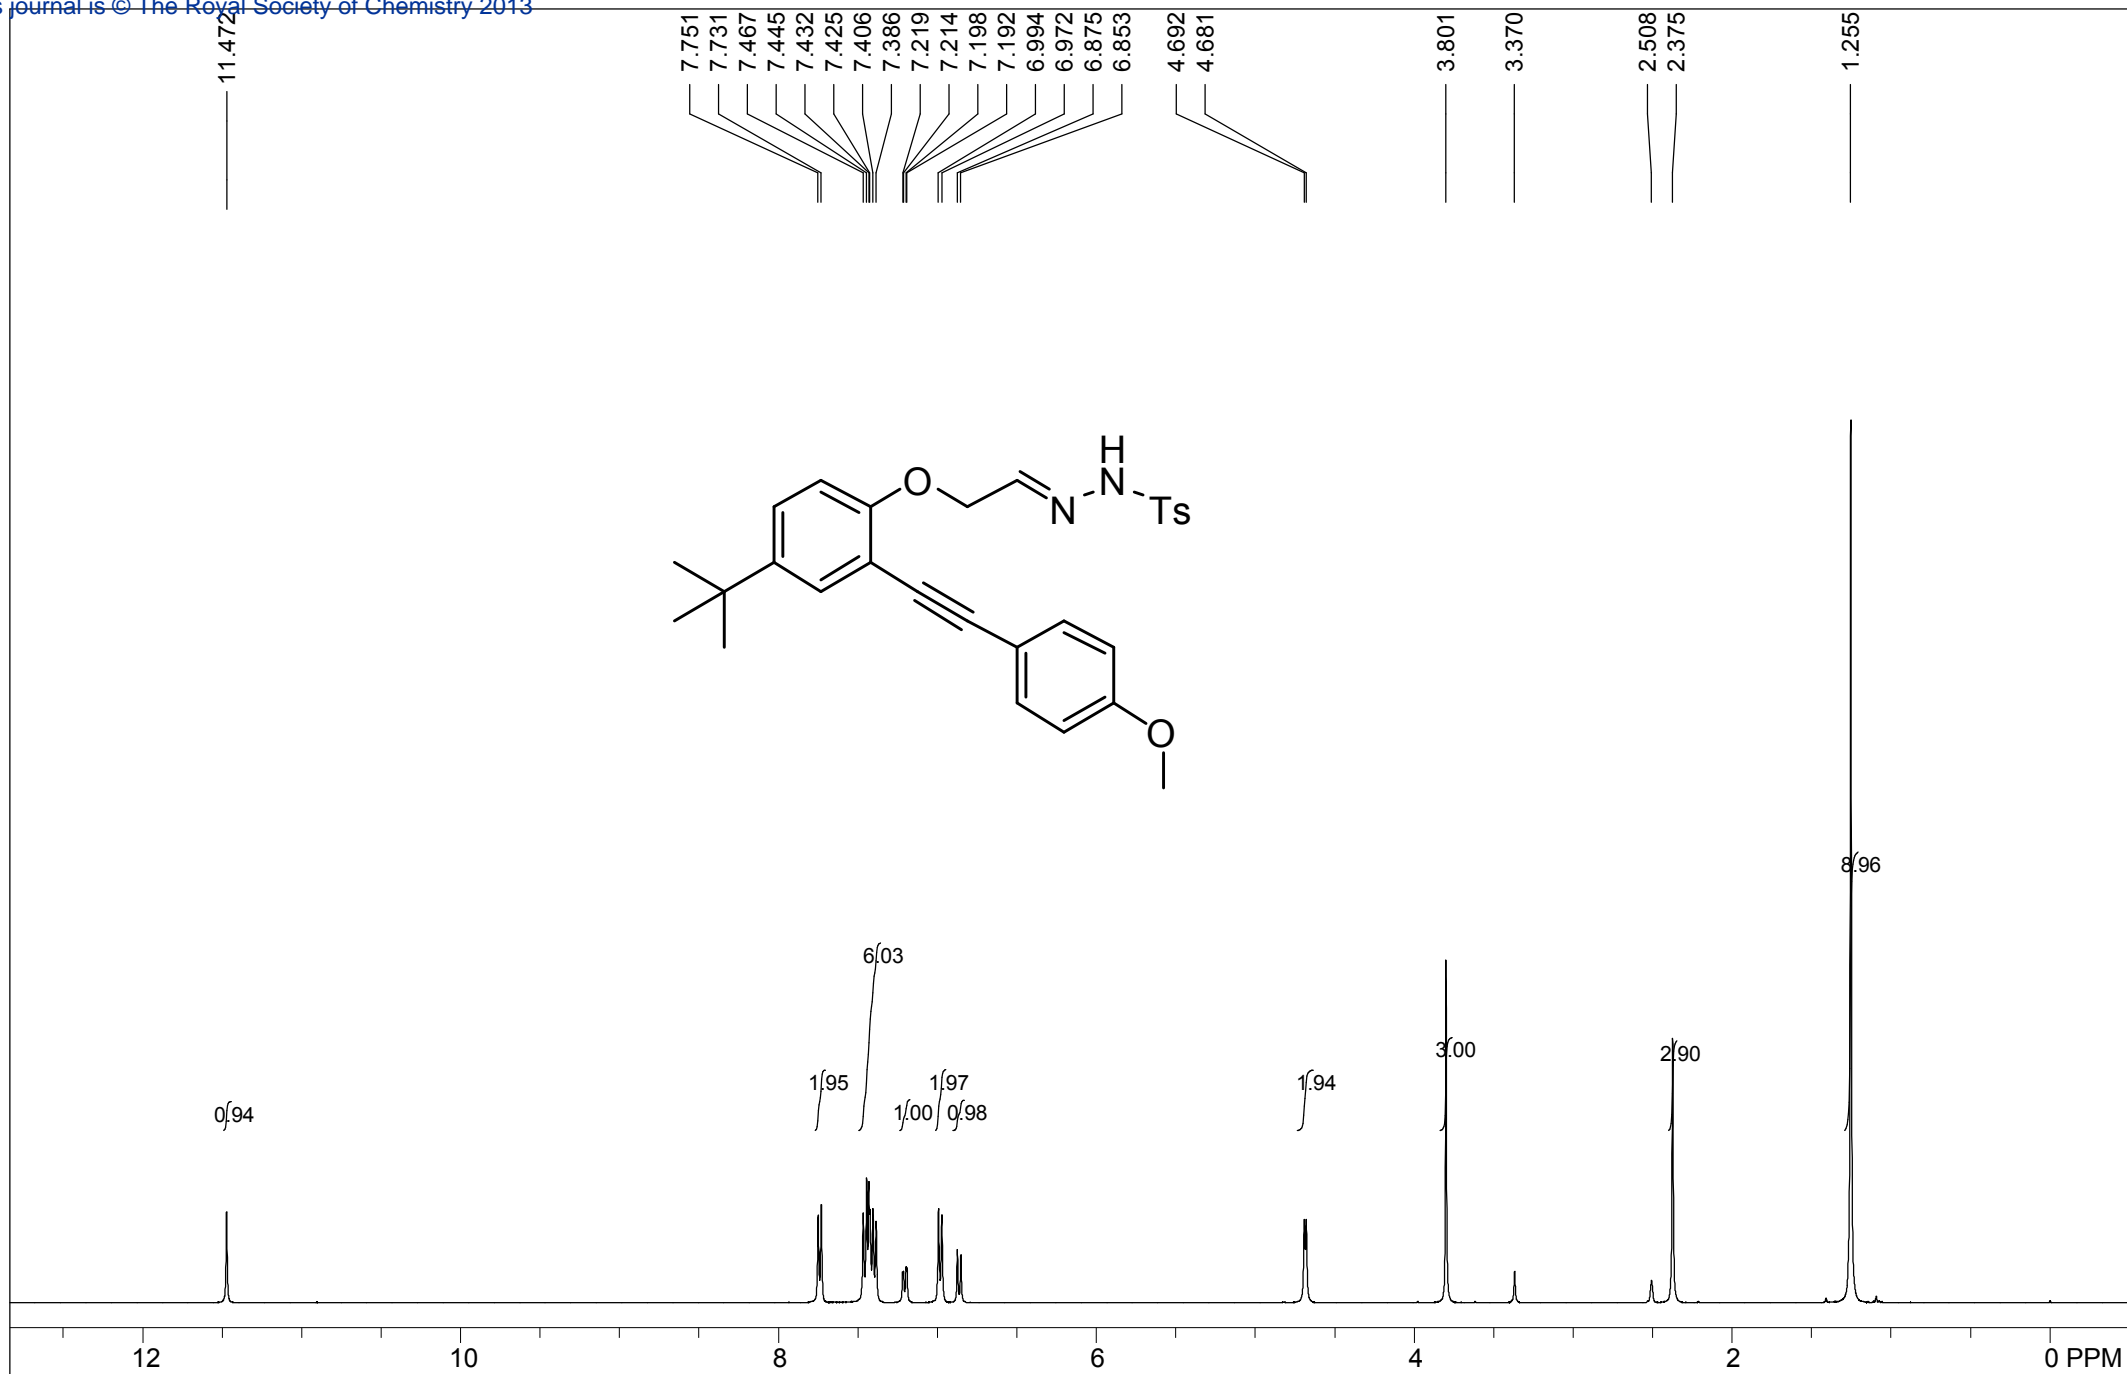

USER: Administr -- DATE: Thu Jun 30 11:26:18 2011

|             |           |             |             |             |         |                      |
|-------------|-----------|-------------|-------------|-------------|---------|----------------------|
| F1: 400.132 | F2: 1.000 | SW1: 8224   |             | OF1: 2471.0 |         | PTS1d: 32768 , 32768 |
| EX: zg30    |           | PW: 13.6 us | PD: 1.0 sec | NA: 2       | LB: 0.0 | Nuts - \$GWQ-2071_1  |

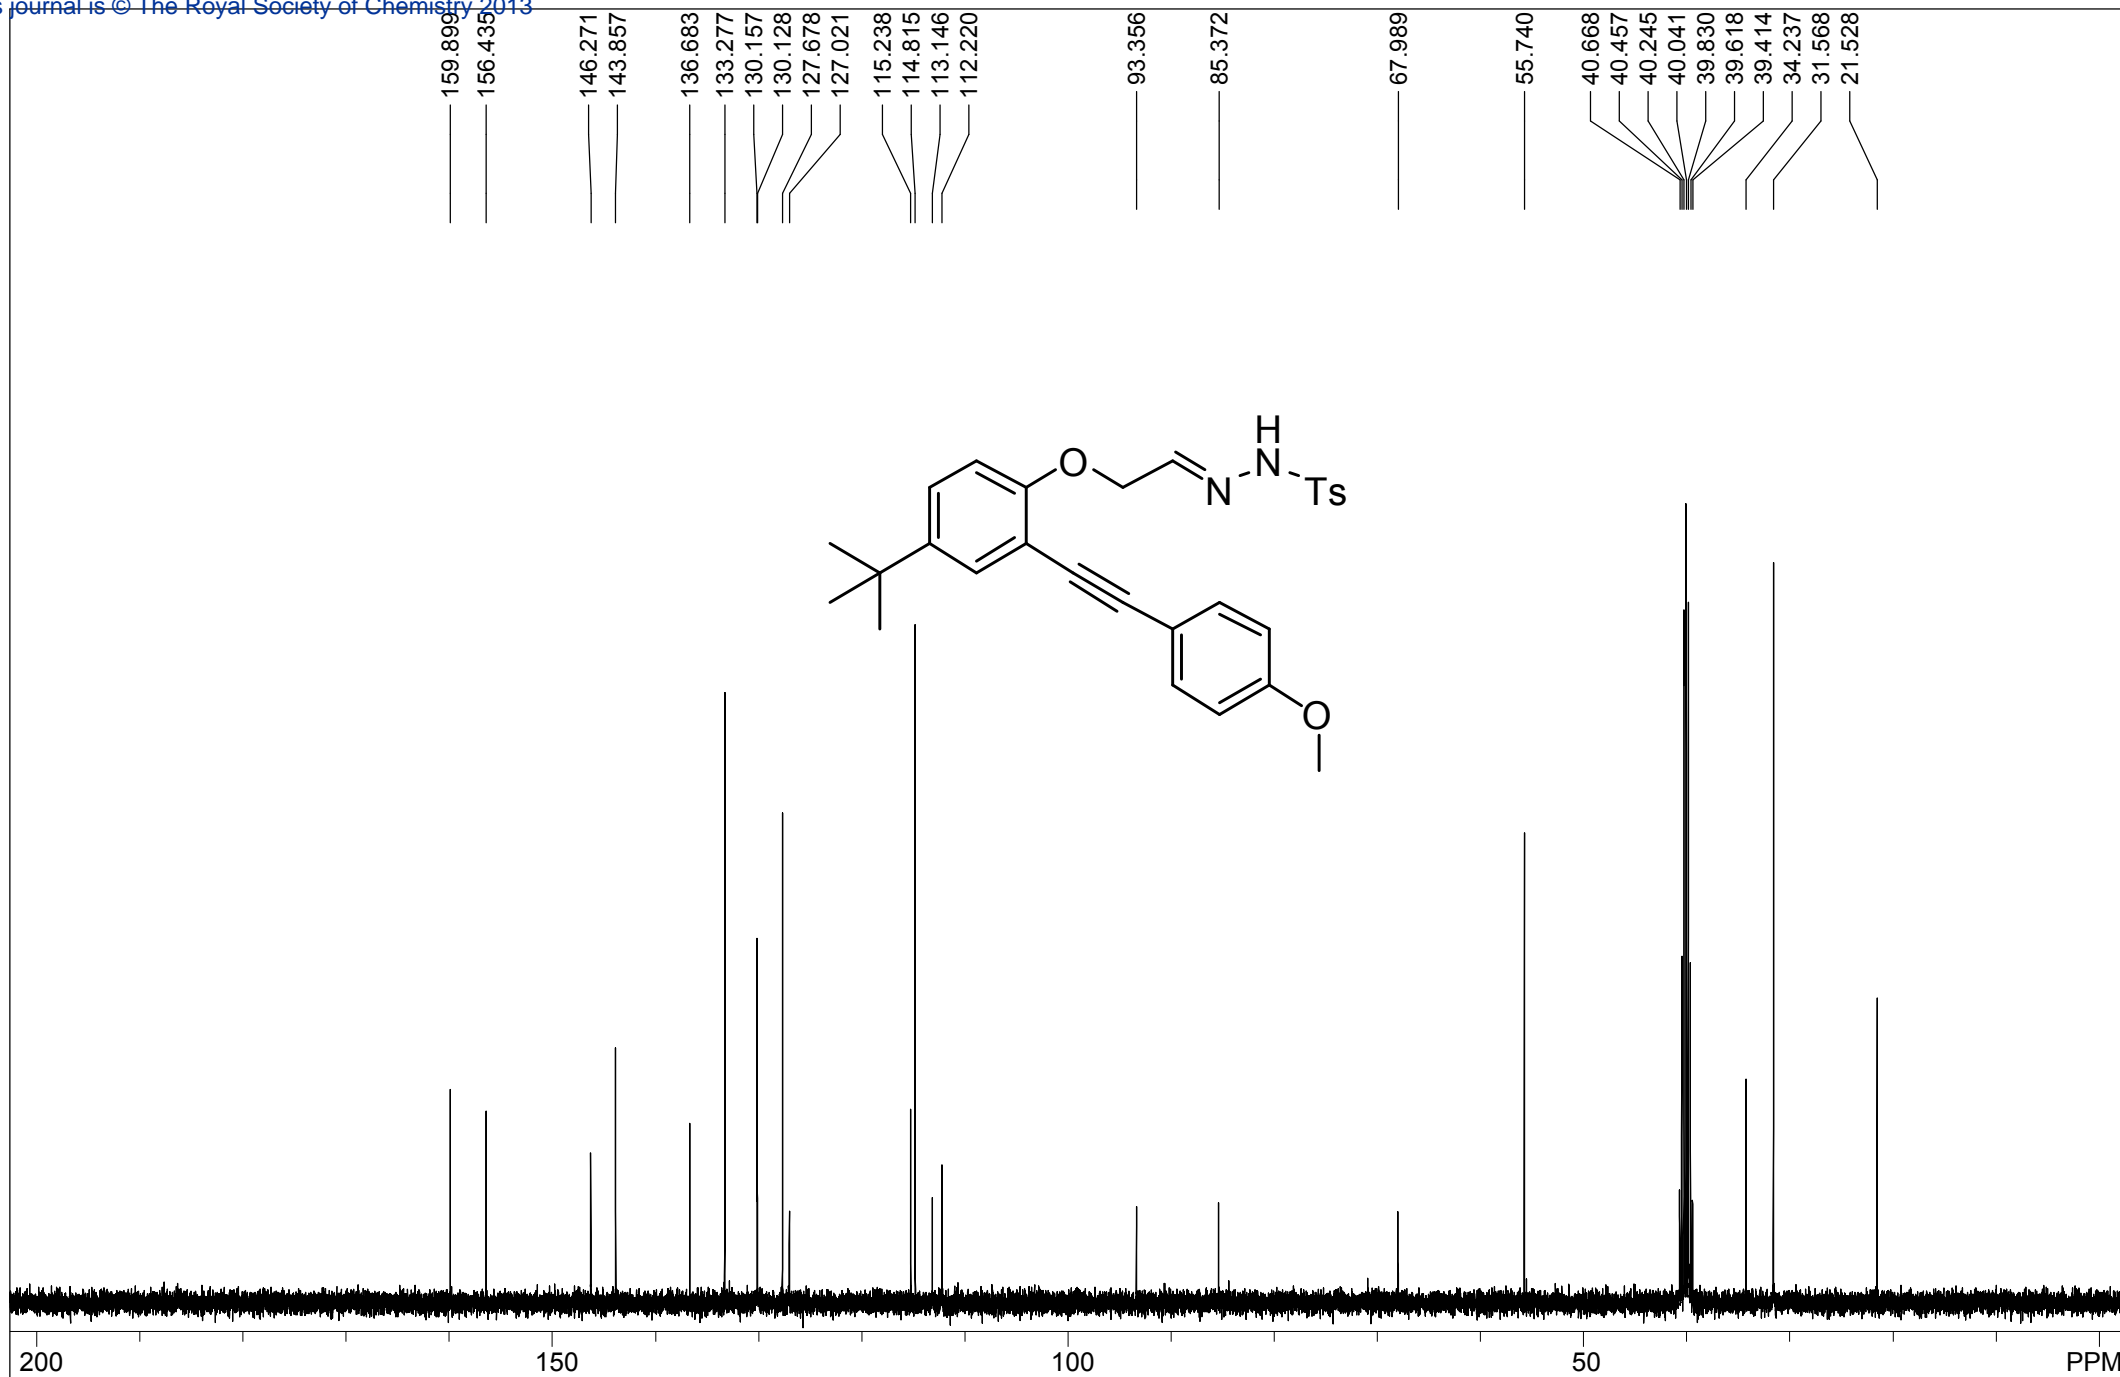

|             |            |             |              |                      |                                                   |
|-------------|------------|-------------|--------------|----------------------|---------------------------------------------------|
| F1: 100.623 | F2: 1.000  | SW1: 24038  | OF1: 10063.0 | PTS1d: 32768 , 32768 | USER: Administr -- DATE: Thu Jun 30 11:42:02 2011 |
| EX: zgpg30  | PW: 9.5 us | PD: 2.0 sec | NA: 100      | LB: 0.0              | Nuts - \$GWQ-2071_4                               |

7.535  
7.514  
7.426  
7.421  
7.101  
7.096  
7.080  
7.075  
6.968  
6.947  
6.905  
6.884

4.920

3.820

1.172

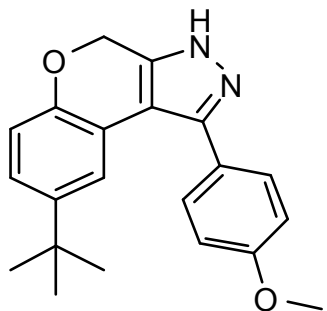

2.10  
1.02  
2.06  
1.06  
1.07

2.00

3.14

9.11

10 8 6 4 2 PPM

USER: Administr -- DATE: Thu Jun 30 23:22:07 2011

|             |           |             |             |             |         |                      |
|-------------|-----------|-------------|-------------|-------------|---------|----------------------|
| F1: 400.132 | F2: 1.000 | SW1: 8224   |             | OF1: 2441.1 |         | PTS1d: 32768 , 32768 |
| EX: zg30    |           | PW: 13.6 us | PD: 1.0 sec | NA: 2       | LB: 0.0 | Nuts - \$GWQ-2076_1  |

160.358  
150.237  
146.460  
144.638  
138.702  
129.748  
124.258  
122.347  
120.065  
119.234  
116.799  
114.356  
109.427  
77.476  
77.162  
76.841  
64.045  
55.448  
34.295  
31.437

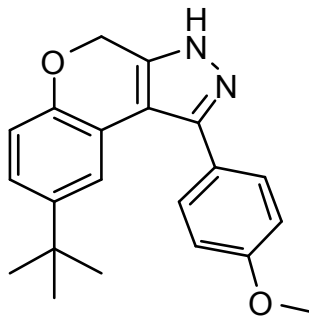

150 100 50 PPM

USER: Administr -- DATE: Thu Jun 30 23:27:37 2011

|             |            |             |              |                      |
|-------------|------------|-------------|--------------|----------------------|
| F1: 100.623 | F2: 1.000  | SW1: 24038  | OF1: 10063.0 | PTS1d: 32768 , 32768 |
| EX: zgpg30  | PW: 9.5 us | PD: 2.0 sec | NA: 50       | LB: 0.0              |
|             |            |             |              | Nuts - \$GWQ-2076_2  |



7.375  
7.369  
7.260  
7.202  
7.195  
7.180  
7.174  
6.707  
6.685

4.288  
4.270  
4.659  
4.252  
4.234

1.648  
1.536  
1.521  
1.516  
1.496  
1.488  
1.469  
1.314  
1.296  
1.278  
1.260  
0.874  
0.869  
0.860  
0.856  
0.853  
0.850  
0.846  
0.843

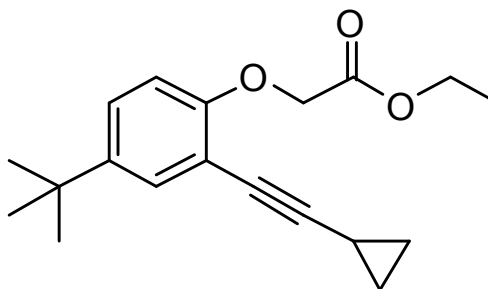

0.880/93  
0.93

1.87  
1.90

0.89

8/70

3.00

3/78

10

8

6

4

2

0PPM

USER: Administr -- DATE: Sat Jun 11 11:00:08 2011

F1: 400.132

F2: 1.000

SW1: 8224

OF1: 2461.3

PTS1d: 32768 , 32768

EX: zg30

PW: 13.6 us

PD: 1.0 sec

NA: 3

LB: 0.0

Nuts - \$GWQ-2060\_1

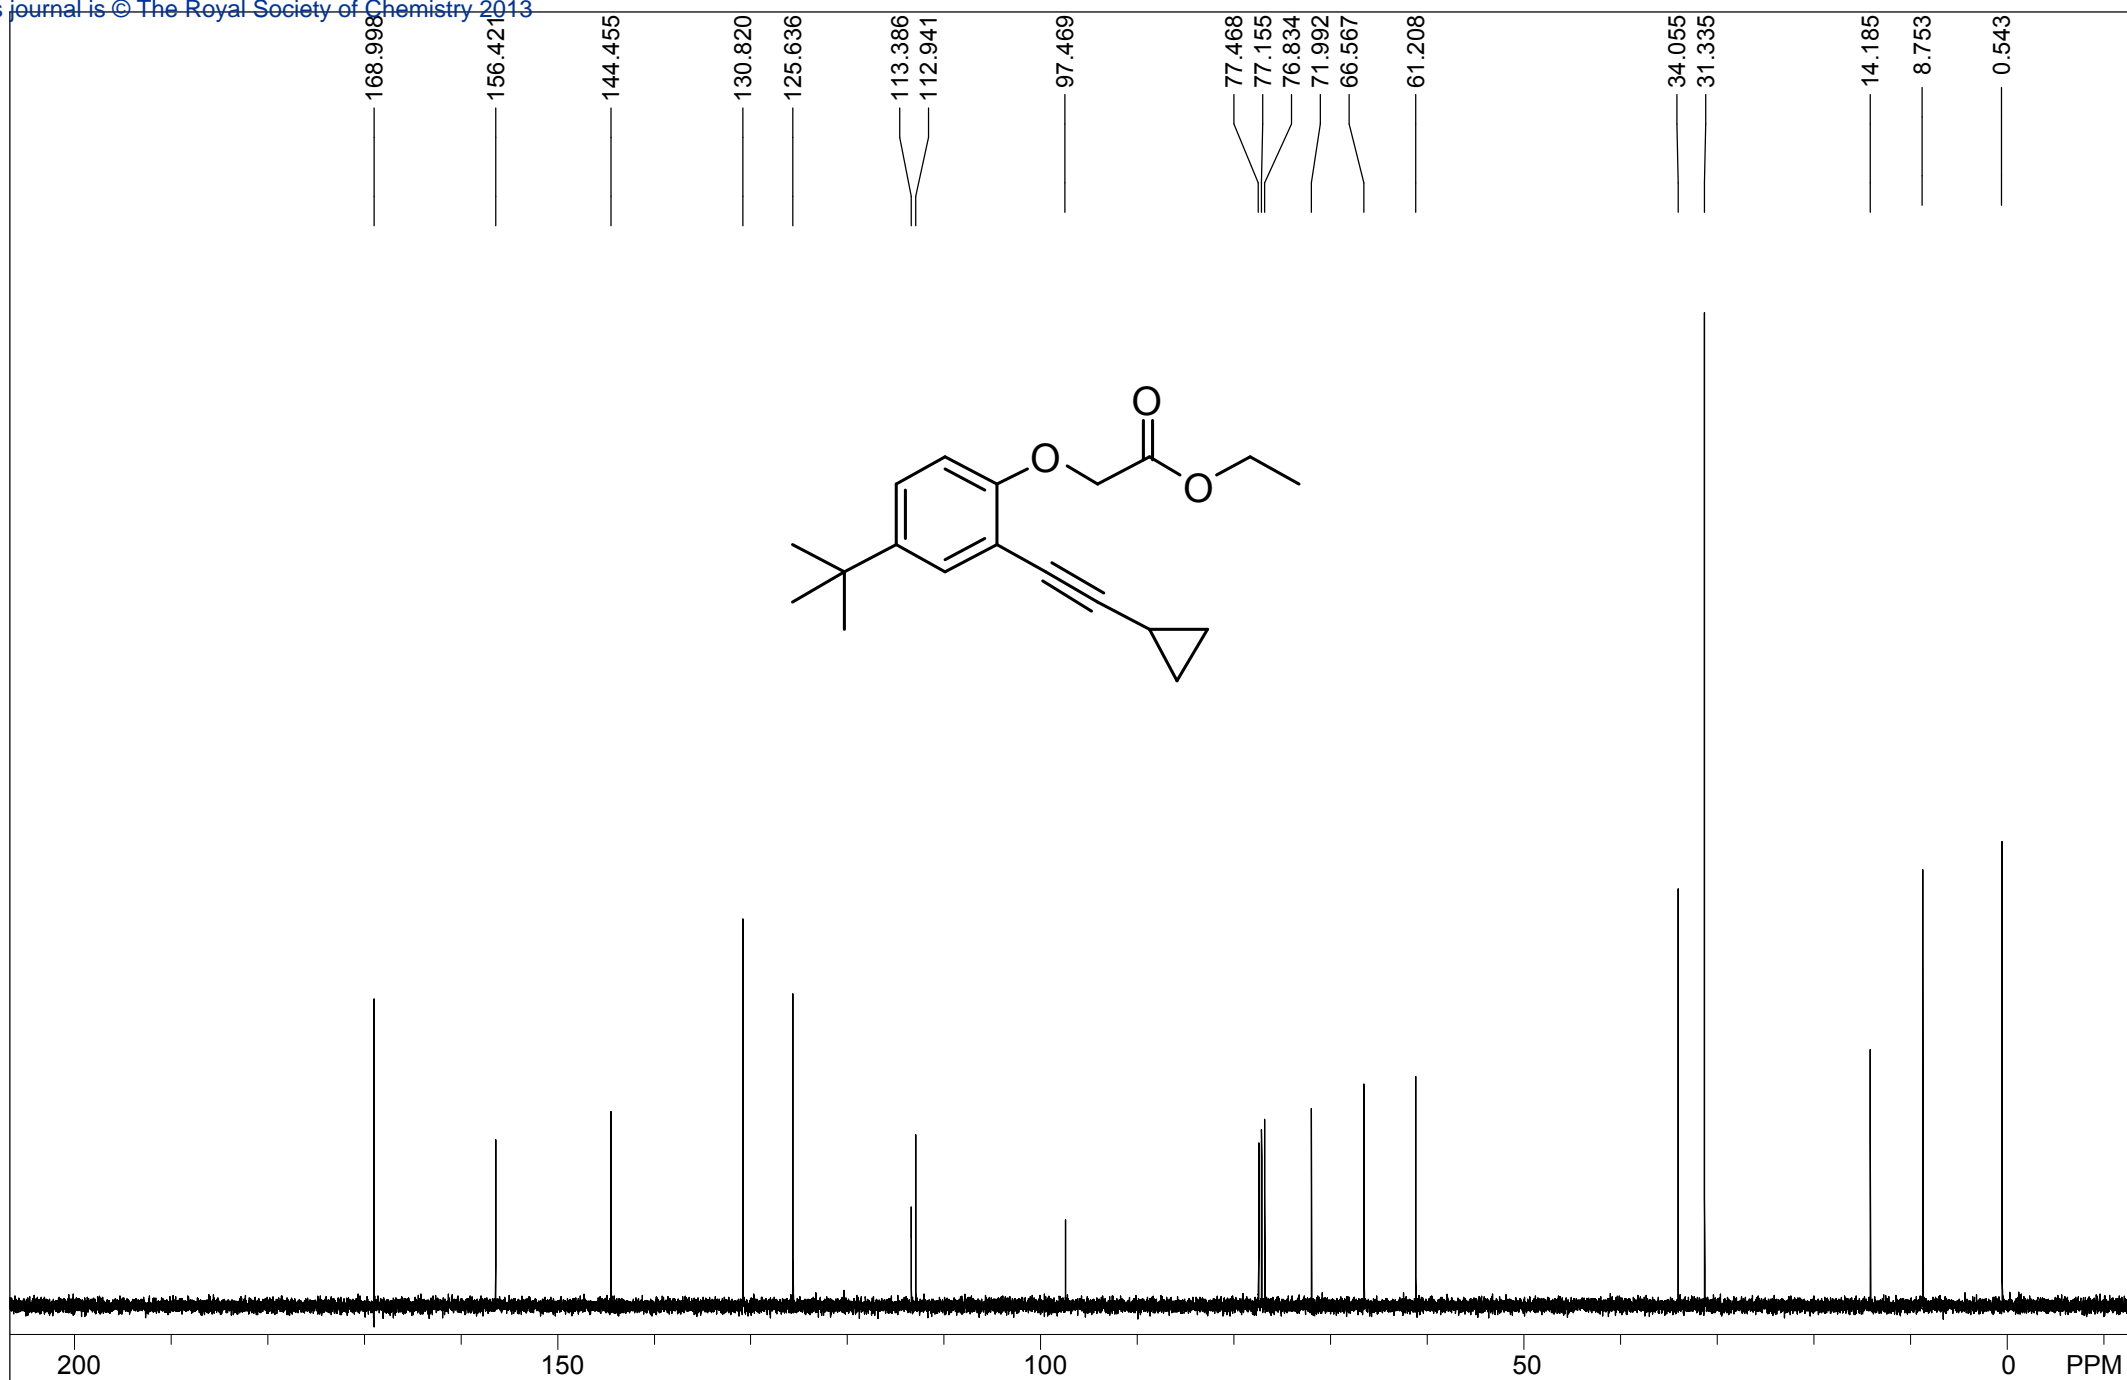

USER: Administr -- DATE: Fri Jun 10 11:45:07 2011

|             |           |            |             |              |         |                      |                     |
|-------------|-----------|------------|-------------|--------------|---------|----------------------|---------------------|
| F1: 100.623 | F2: 1.000 | SW1: 24038 |             | OF1: 10063.0 |         | PTS1d: 32768 , 32768 |                     |
| EX: zgpg30  |           | PW: 9.5 us | PD: 2.0 sec | NA: 24       | LB: 0.0 |                      | Nuts - \$GWQ-2060_5 |

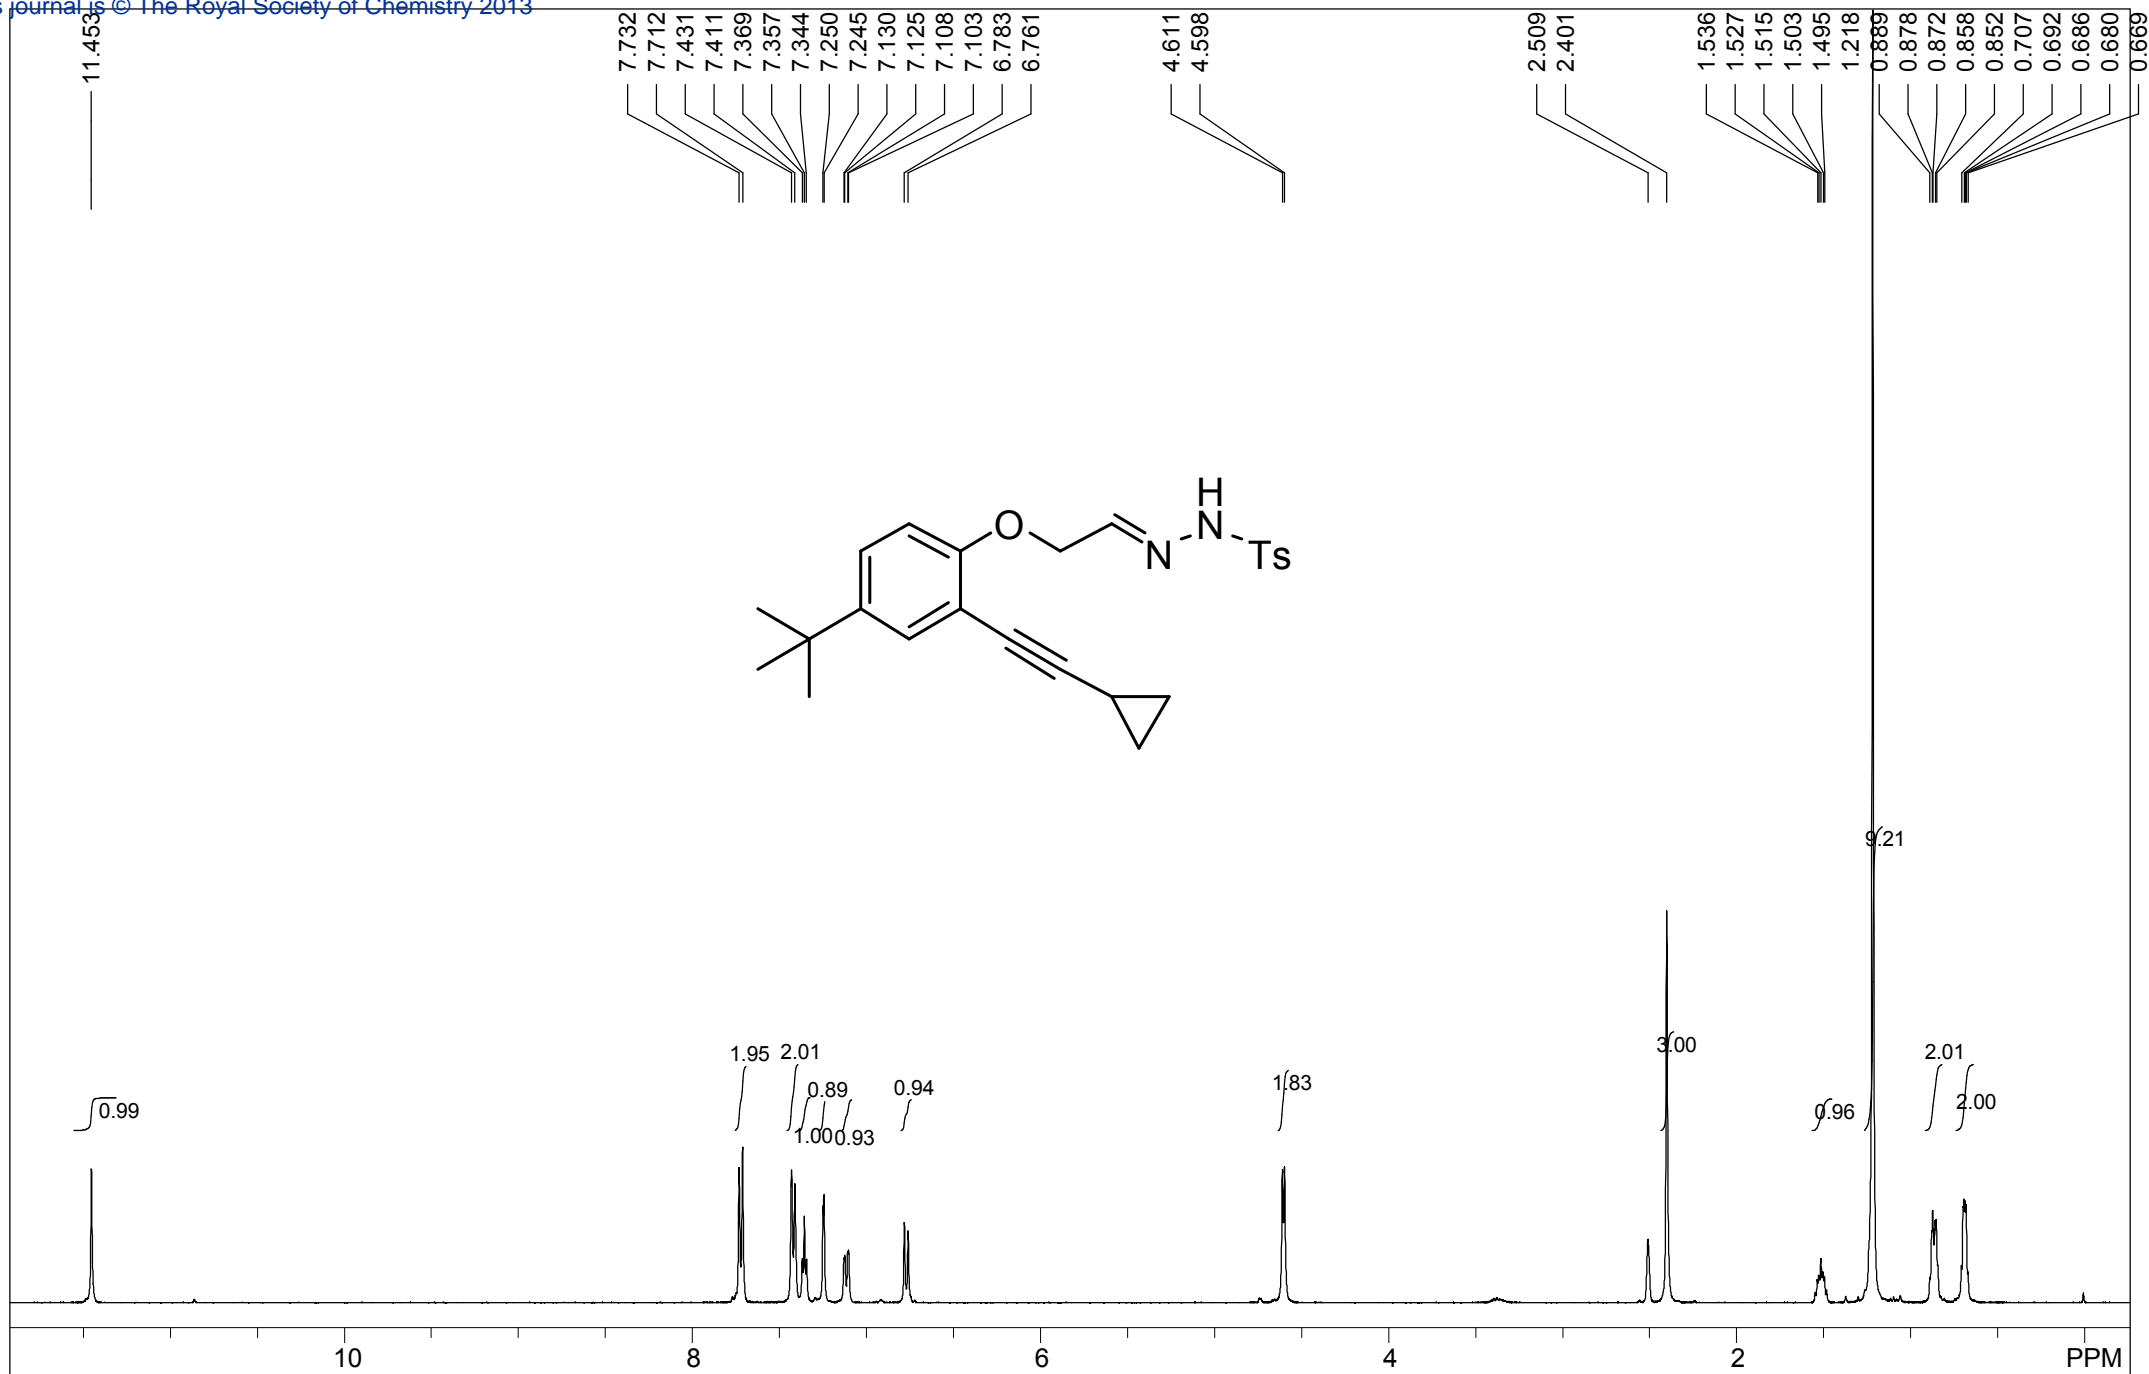

USER: Administr -- DATE: Mon Jun 13 12:09:39 2011

|             |             |             |             |                      |
|-------------|-------------|-------------|-------------|----------------------|
| F1: 400.132 | F2: 1.000   | SW1: 8224   | OF1: 2471.0 | PTS1d: 32768 , 32768 |
| EX: zg30    | PW: 13.6 us | PD: 1.0 sec | NA: 2       | LB: 0.0              |

Nuts - \$GWQ-2061\_1

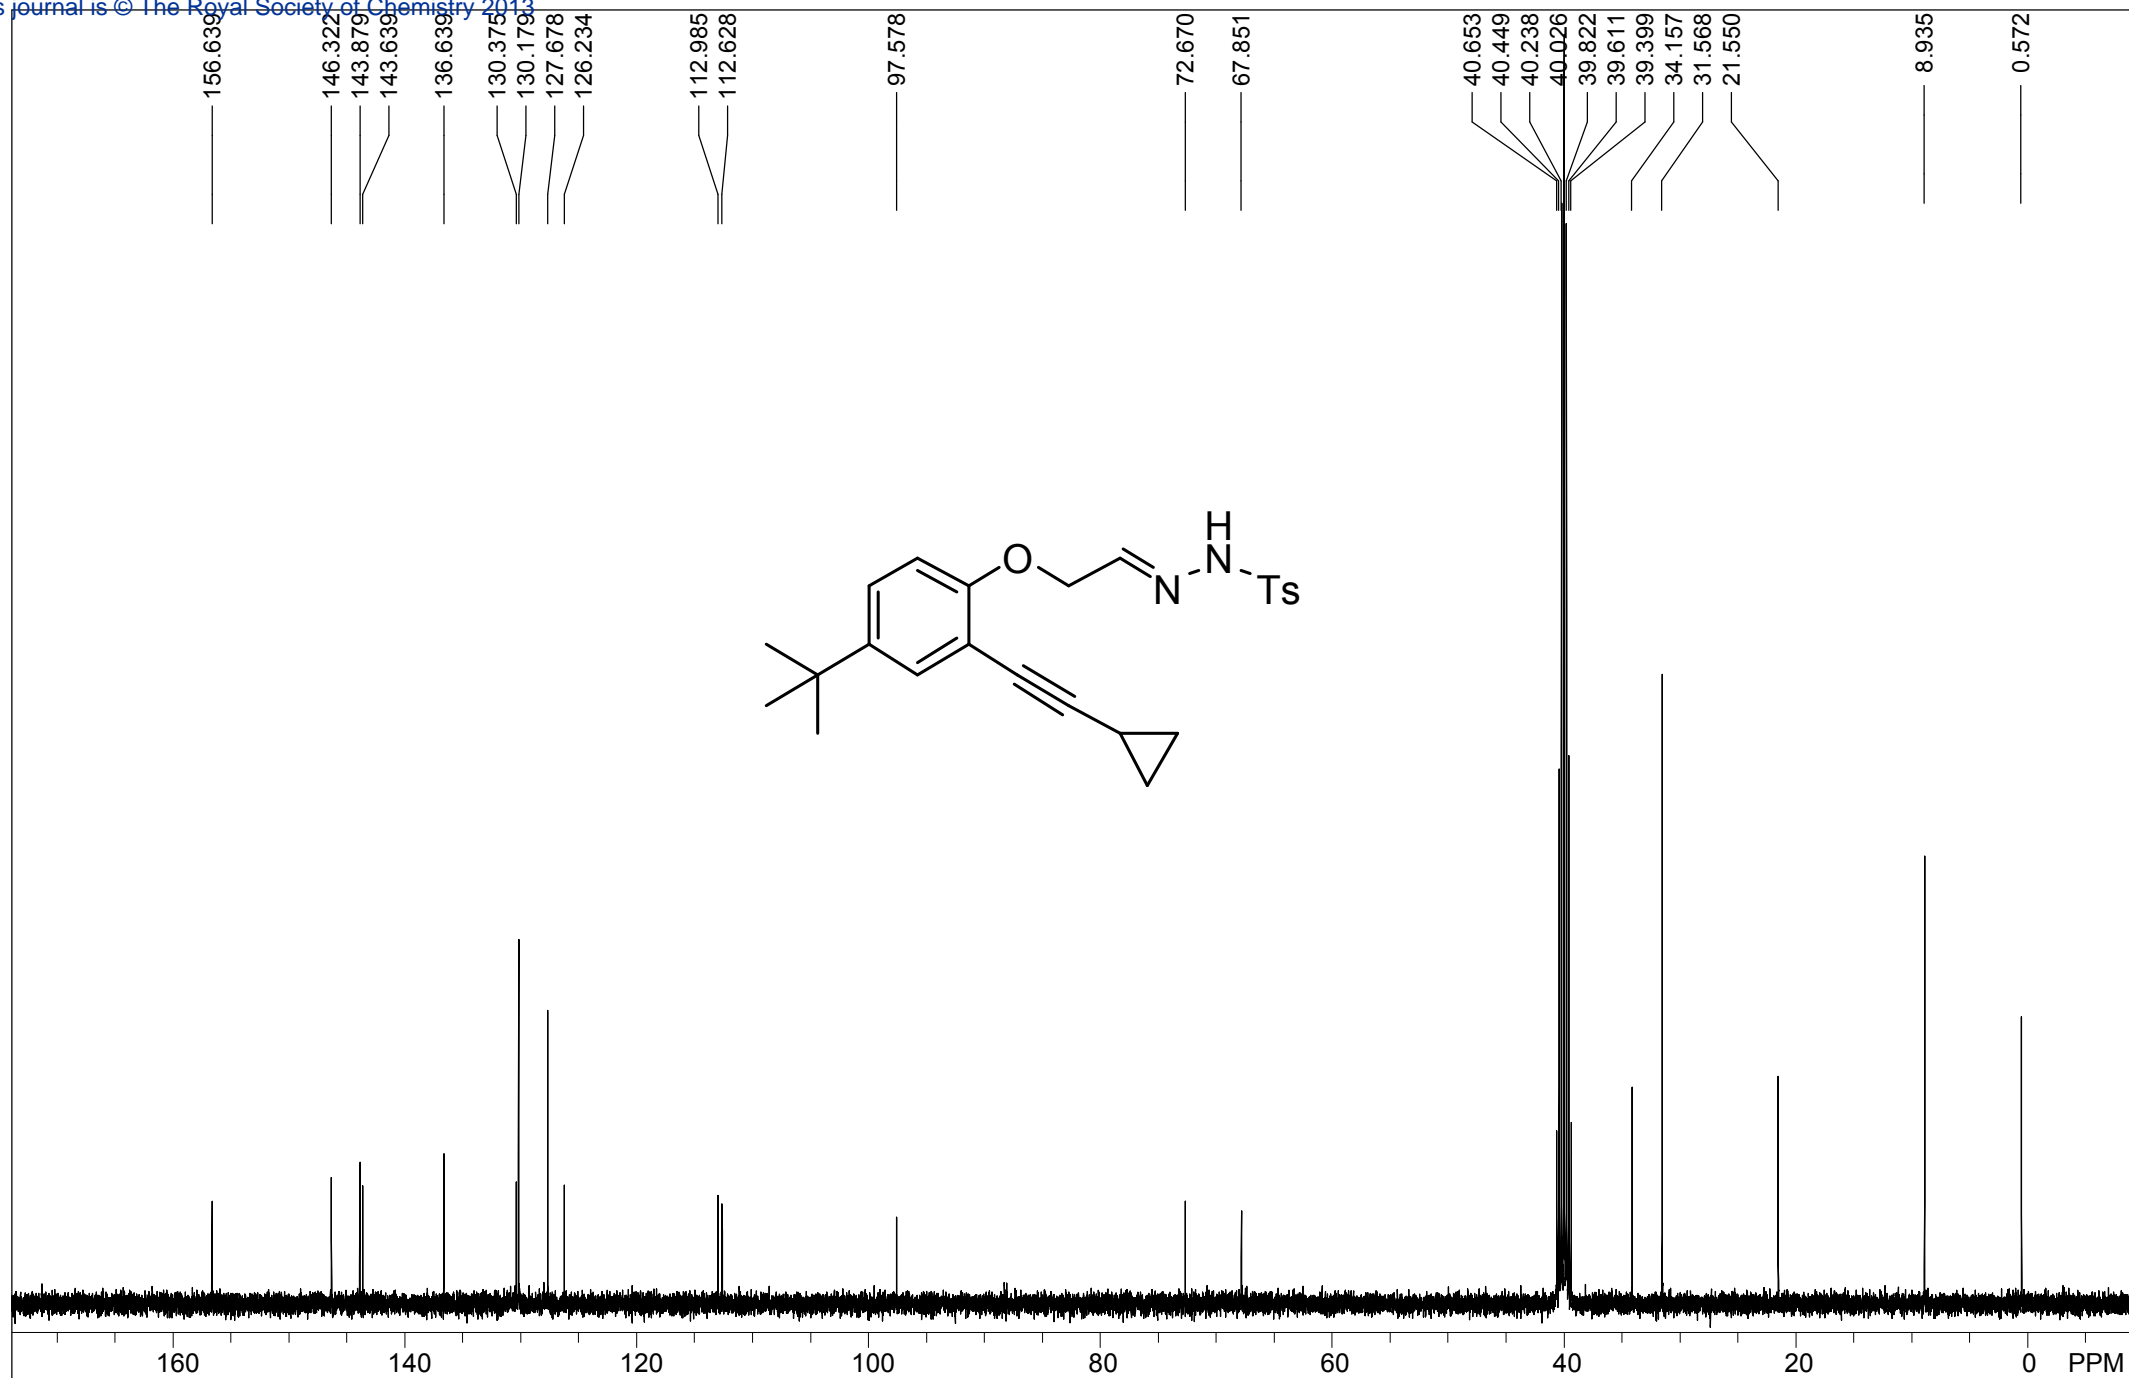

USER: Administr -- DATE: Mon Jun 13 12:16:29 2011

|             |           |            |             |              |         |                      |                     |
|-------------|-----------|------------|-------------|--------------|---------|----------------------|---------------------|
| F1: 100.623 | F2: 1.000 | SW1: 24038 |             | OF1: 10063.0 |         | PTS1d: 32768 , 32768 |                     |
| EX: zgpg30  |           | PW: 9.5 us | PD: 2.0 sec | NA: 300      | LB: 0.0 |                      | Nuts - \$GWQ-2061_2 |

7.731  
7.725  
7.238  
7.155  
7.149  
7.134  
7.128  
6.931  
6.910

5.227

2.072  
2.064  
2.050  
2.044  
2.037  
2.030  
1.402  
1.353  
1.341  
1.300  
1.295  
1.266  
1.258  
1.095  
1.083  
1.079  
1.068  
1.063  
1.058  
1.047  
0.847  
0.835  
0.832  
0.823  
0.819  
0.807

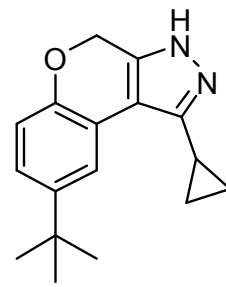

0.96  
0.98  
1.00

1.86

1.10

8.98

2.00

2.00

8 6 4 2 0 PPM

USER: Administr -- DATE: Wed Jun 15 12:53:01 2011

|             |           |             |             |             |         |                      |                     |
|-------------|-----------|-------------|-------------|-------------|---------|----------------------|---------------------|
| F1: 400.132 | F2: 1.000 | SW1: 8224   |             | OF1: 2452.4 |         | PTS1d: 32768 , 32768 |                     |
| EX: zg30    |           | PW: 13.6 us | PD: 1.0 sec | NA: 2       | LB: 0.0 |                      | Nuts - \$GWQ-2062_1 |

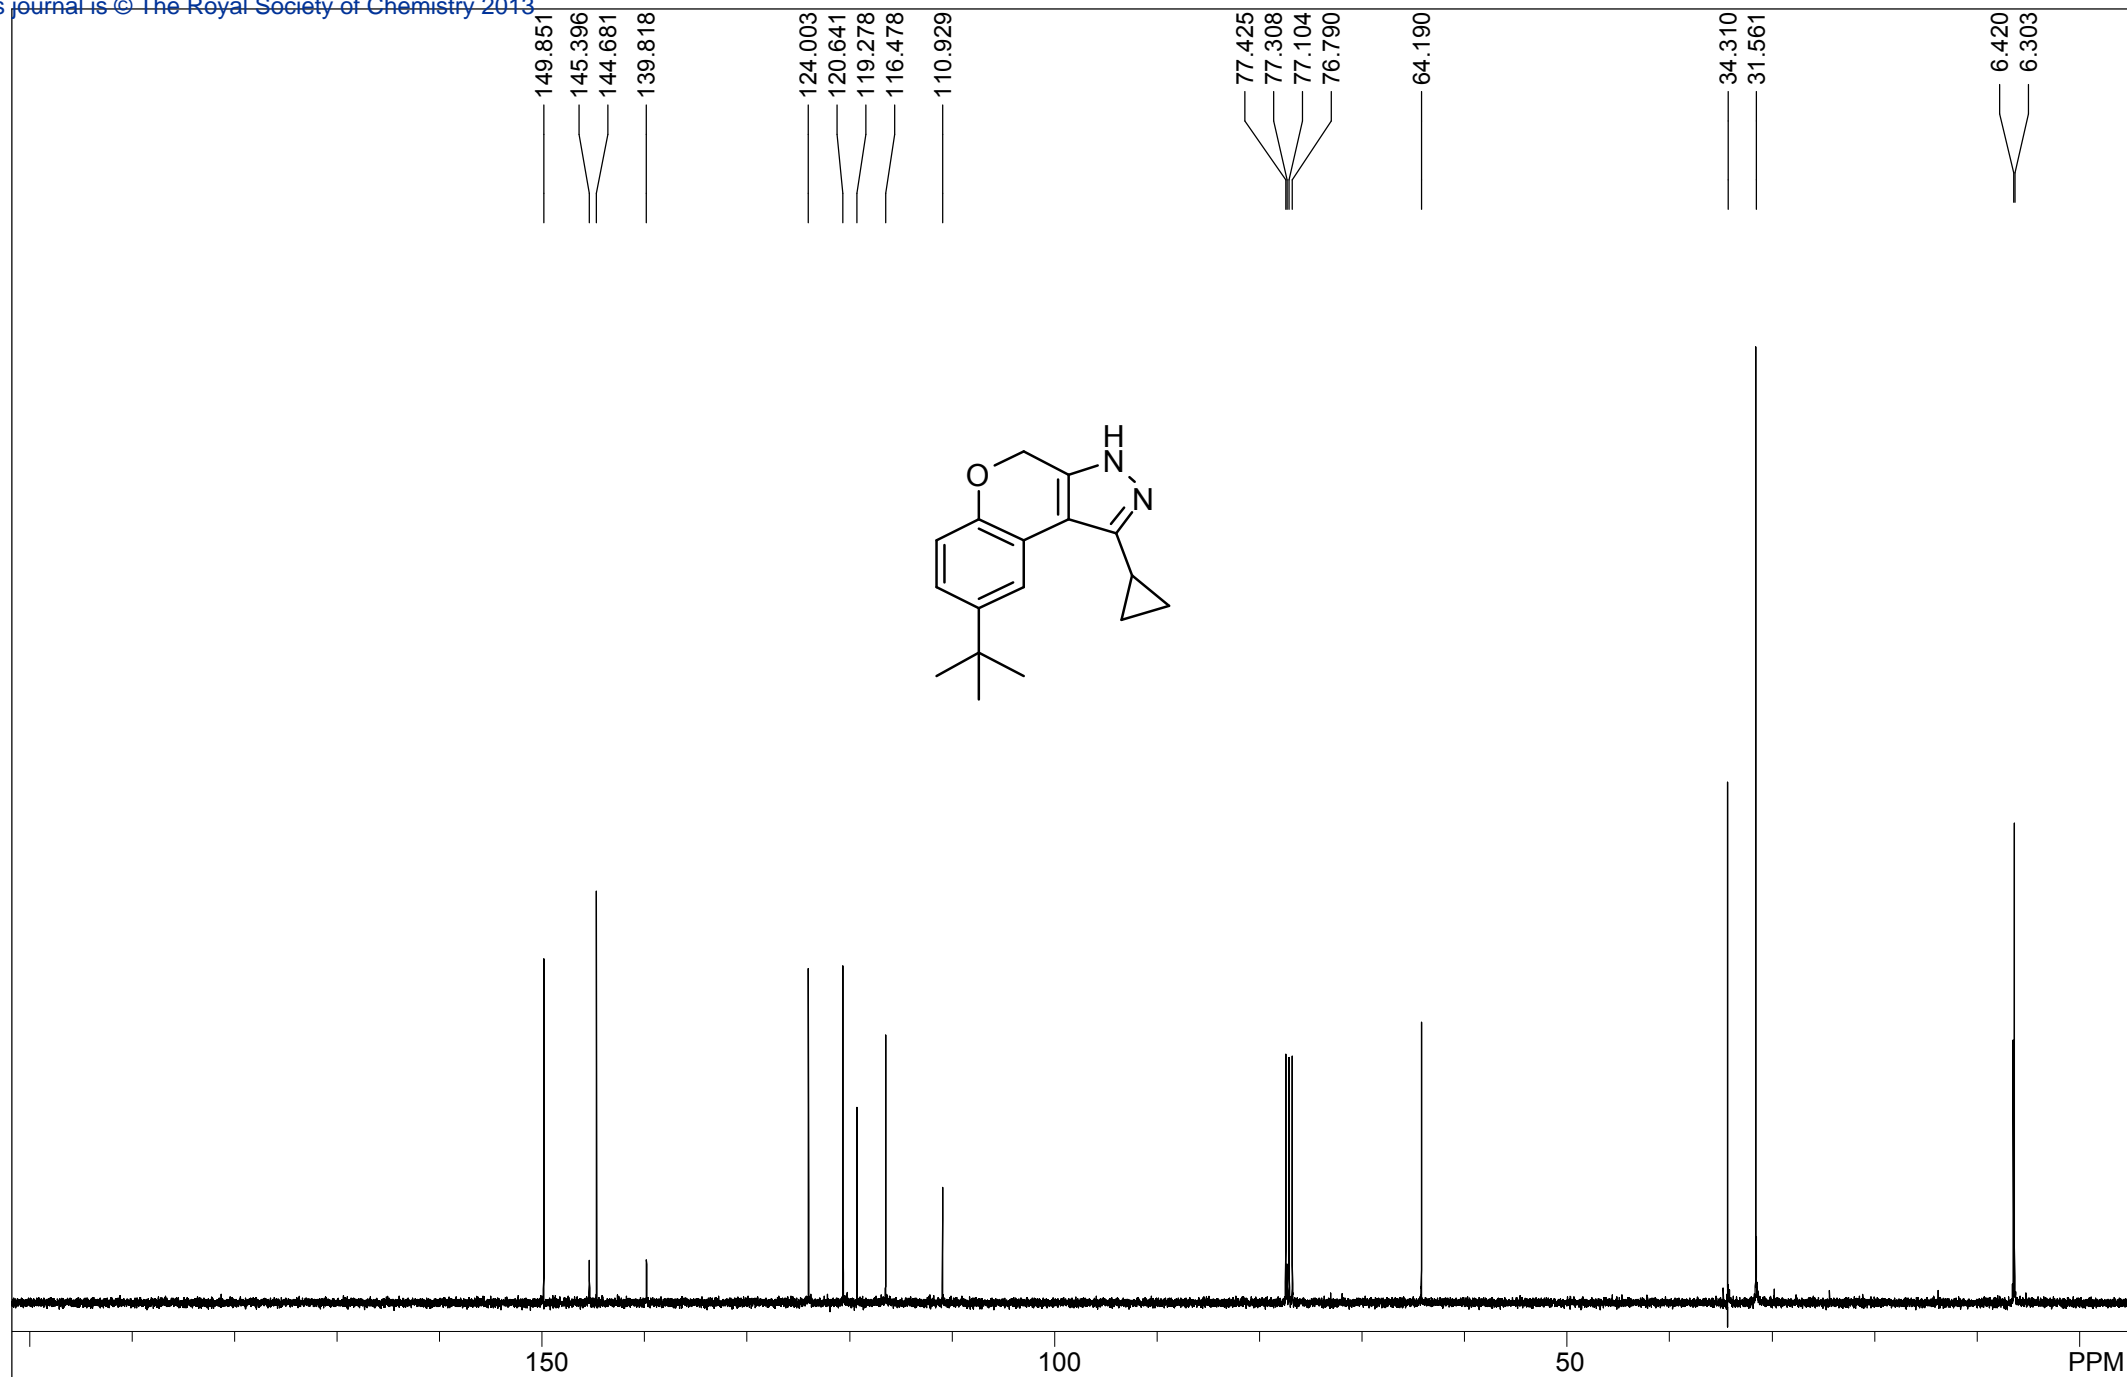

C13CPD CDCI3 {D:\data\research\2011-6-21} nmr 7, ,

USER: nmr -- DATE: Tue Jun 21 15:22:14 2011

|             |           |            |             |              |         |                      |                      |
|-------------|-----------|------------|-------------|--------------|---------|----------------------|----------------------|
| F1: 100.623 | F2: 1.000 | SW1: 24038 |             | OF1: 10063.0 |         | PTS1d: 32768 , 32768 |                      |
| EX: zgpg30  |           | PW: 9.0 us | PD: 2.0 sec | NA: 400      | LB: 0.0 |                      | Nuts - \$GWQ-2062_10 |

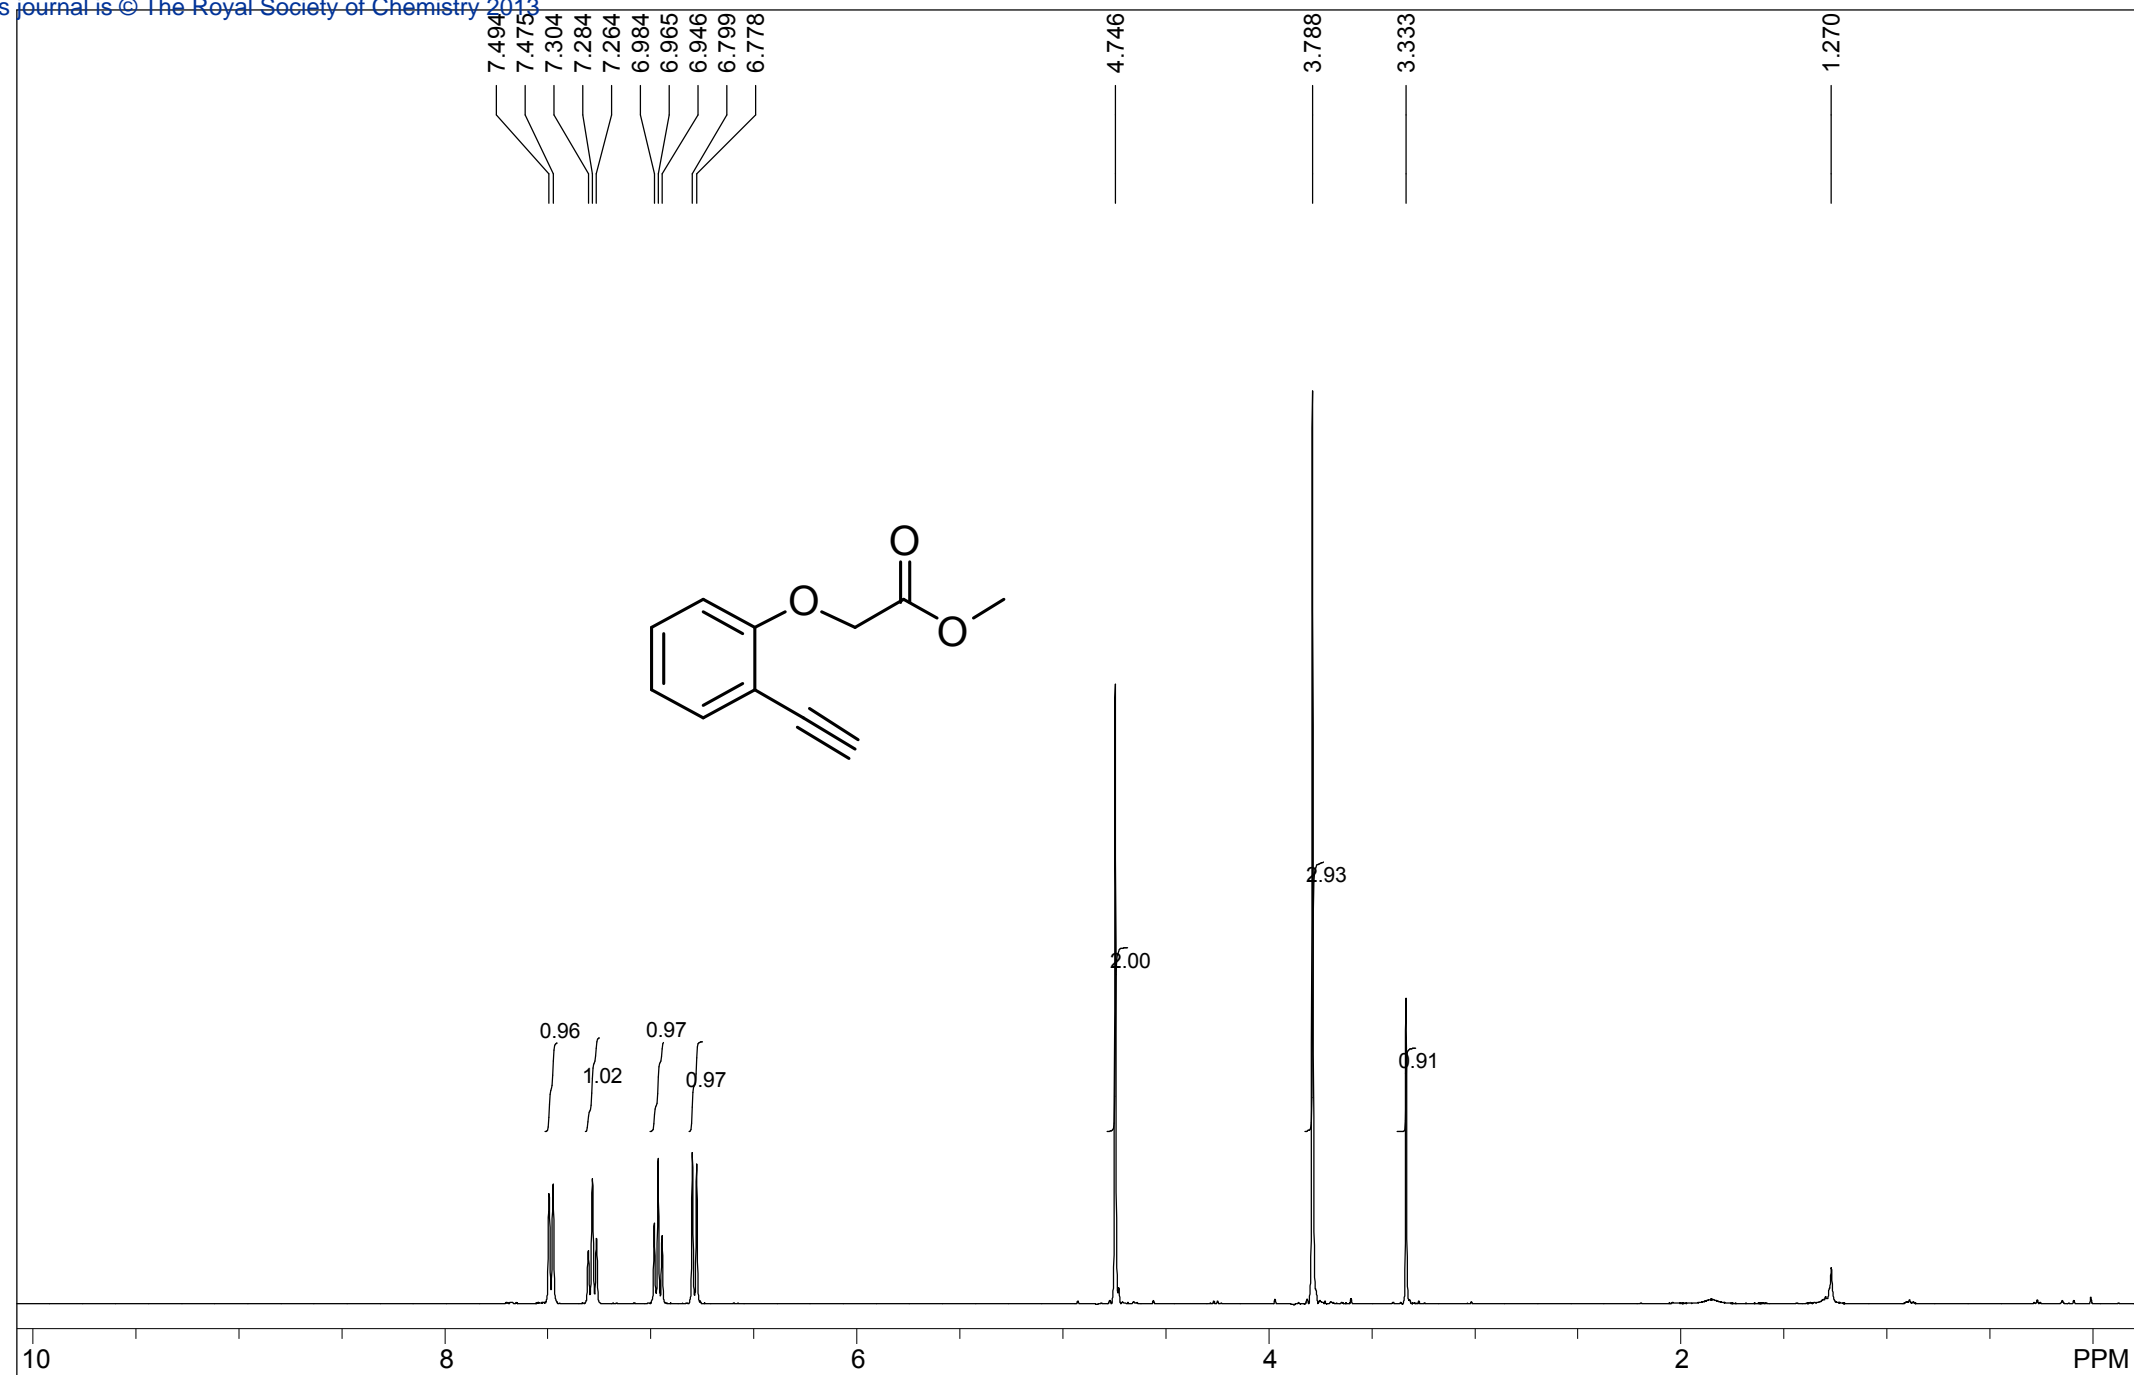

10 8 6 4 2 PPM

USER: Administr -- DATE: Fri Jul 15 11:23:23 2011

|             |           |             |             |             |         |                      |
|-------------|-----------|-------------|-------------|-------------|---------|----------------------|
| F1: 400.132 | F2: 1.000 | SW1: 8224   |             | OF1: 2471.0 |         | PTS1d: 32768 , 32768 |
| EX: zg30    |           | PW: 13.6 us | PD: 1.0 sec | NA: 2       | LB: 0.0 | Nuts - \$GWQ-2085_2  |

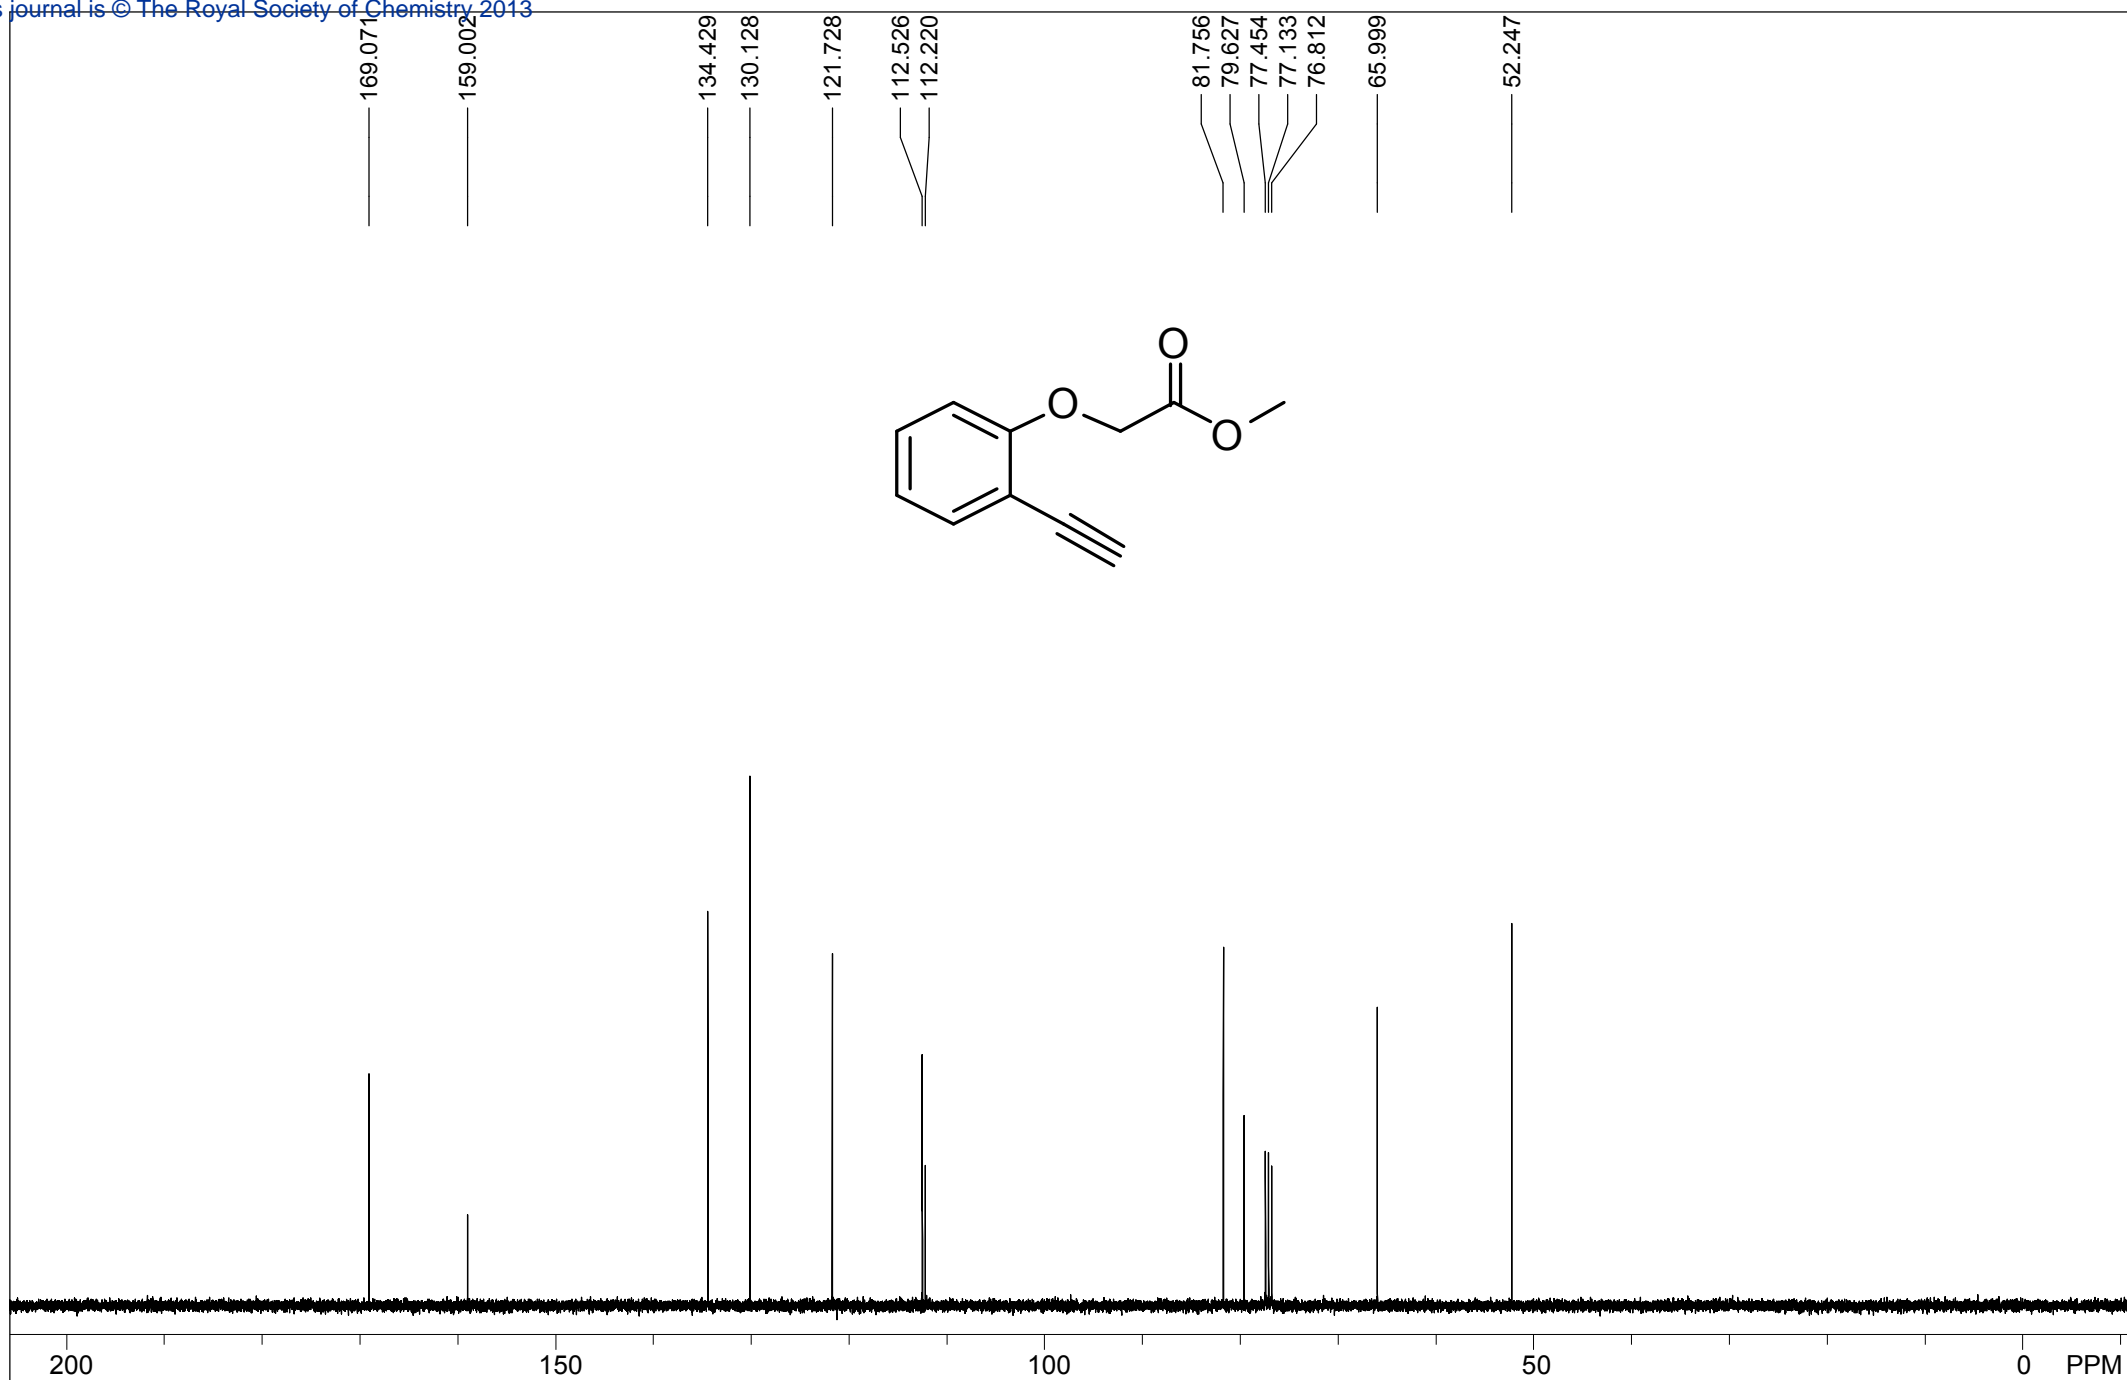

|                                                   |           |            |             |              |         |                      |
|---------------------------------------------------|-----------|------------|-------------|--------------|---------|----------------------|
| USER: Administr -- DATE: Fri Jul 15 11:28:43 2011 |           |            |             |              |         |                      |
| F1: 100.623                                       | F2: 1.000 | SW1: 24038 |             | OF1: 10063.0 |         | PTS1d: 32768 , 32768 |
| EX: zgpg30                                        |           | PW: 9.5 us | PD: 2.0 sec | NA: 71       | LB: 0.0 | Nuts - \$GWQ-2085_3  |



7.522  
7.504  
7.331  
7.322  
7.304  
7.290  
7.283  
7.282  
7.261  
7.025  
7.018  
7.015  
7.004  
6.986  
6.829  
6.808

4.751

3.800

1.303

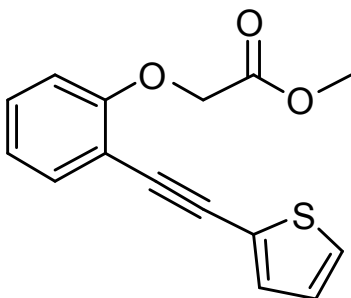

2/99

1/00

2/02

1/02

2/03

3/00

10

8

6

4

2

PPM

USER: Administr -- DATE: Tue Aug 16 22:40:19 2011

F1: 400.132

F2: 1.000

SW1: 8224

OF1: 2471.0

PTS1d: 32768 , 32768

EX: zg30

PW: 13.6 us

PD: 1.0 sec

NA: 2

LB: 0.0

Nuts - \$GWQ-2093\_1

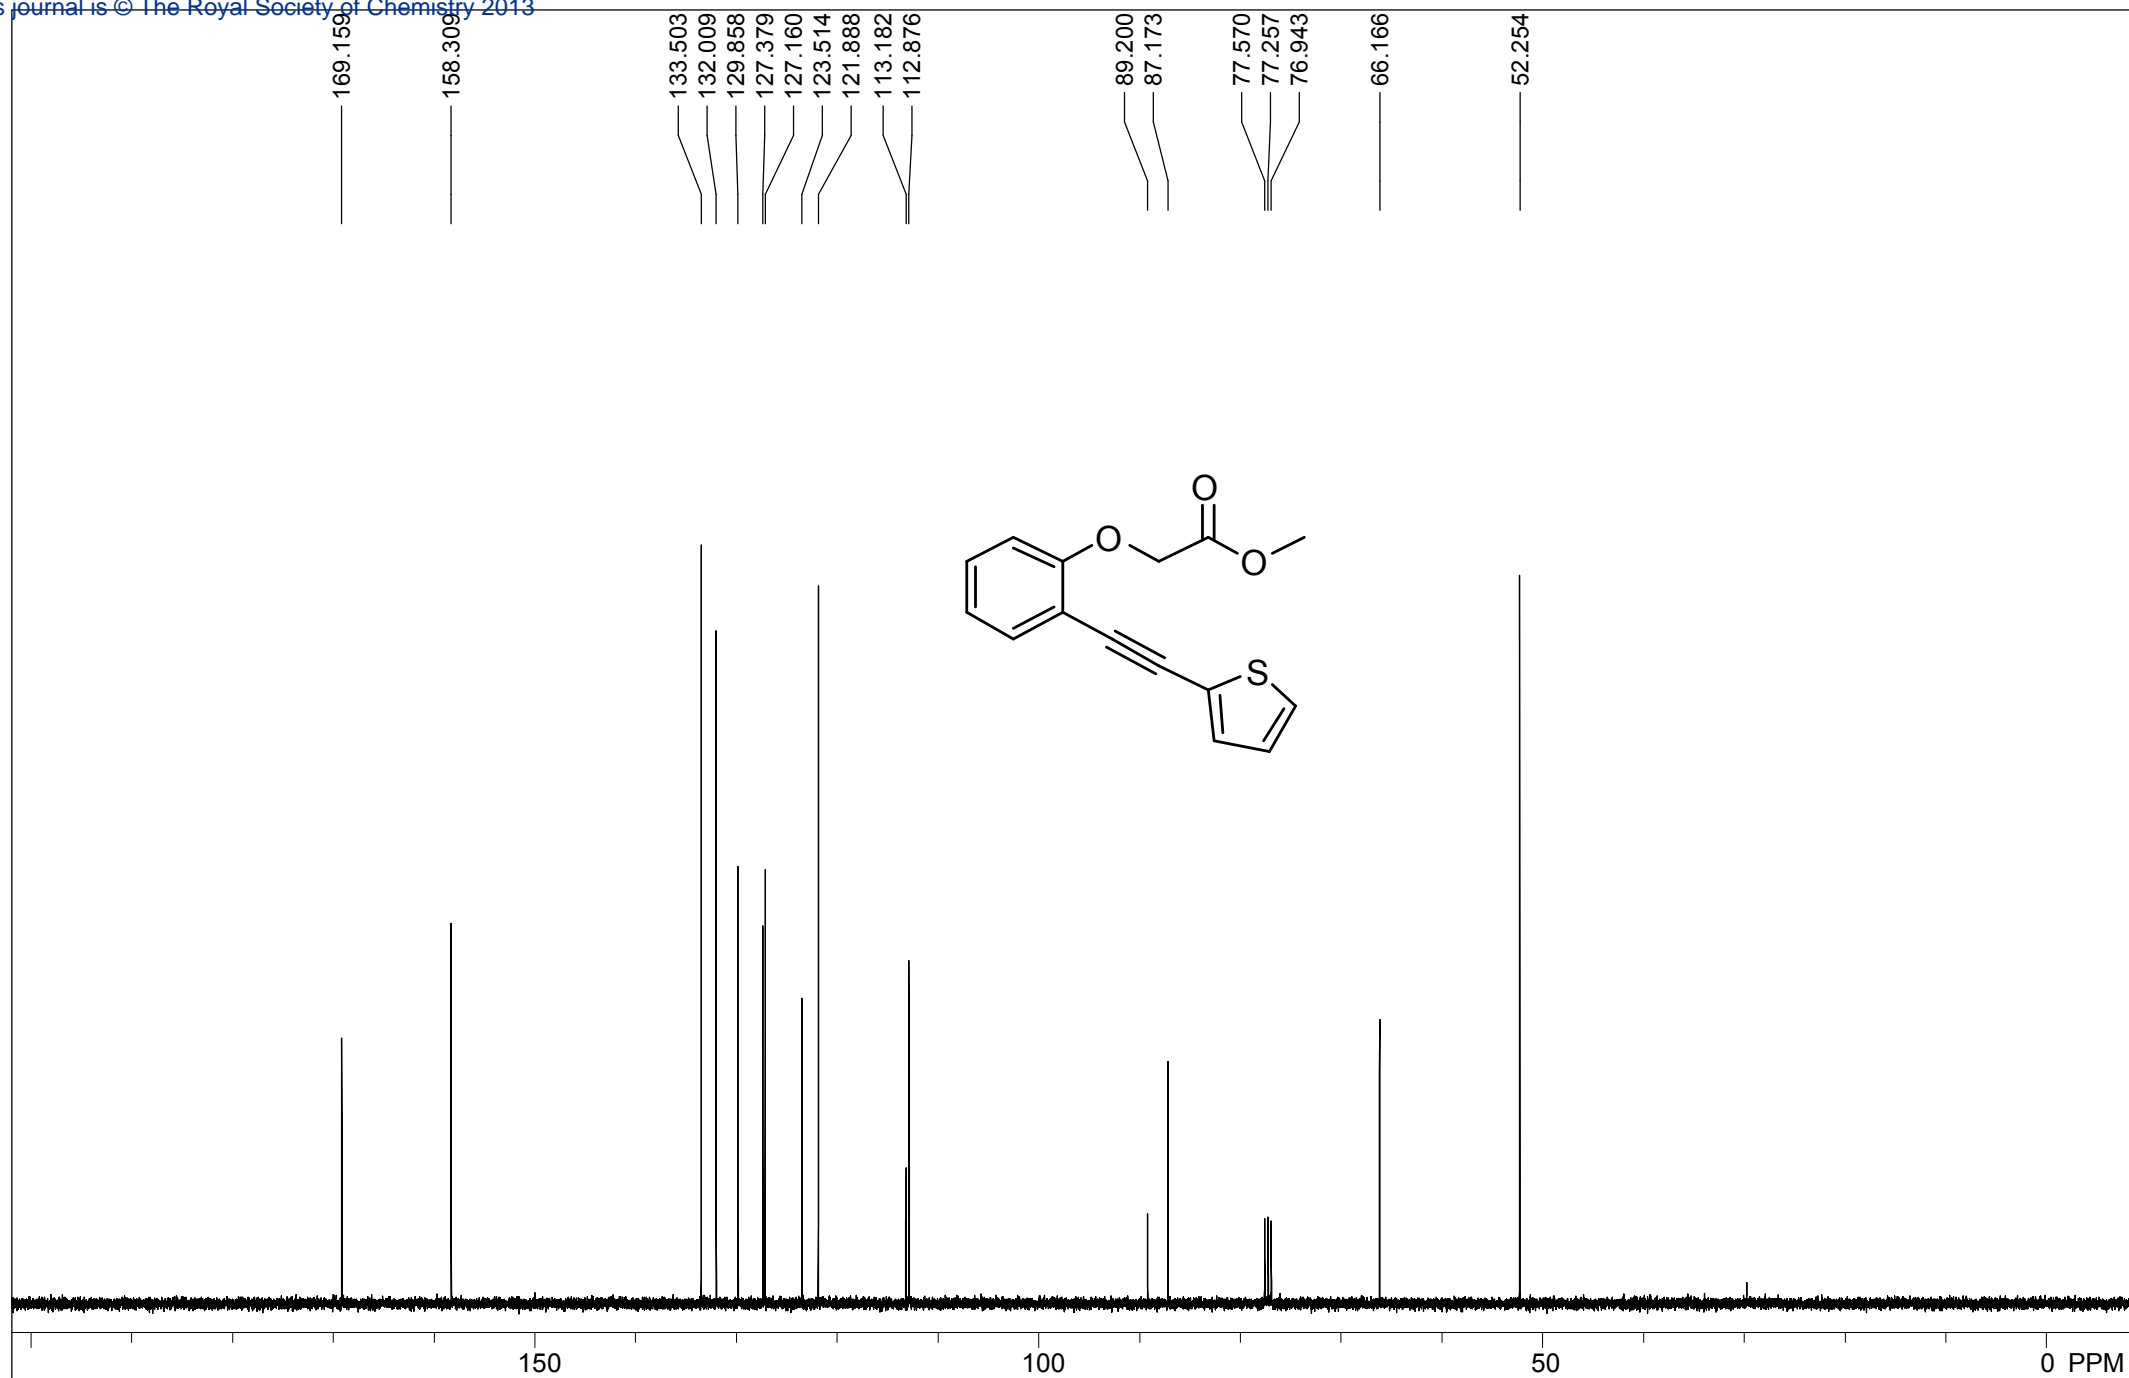

|                                                   |           |            |             |              |         |                      |
|---------------------------------------------------|-----------|------------|-------------|--------------|---------|----------------------|
| USER: Administr -- DATE: Tue Aug 16 22:46:04 2011 |           |            |             |              |         |                      |
| F1: 100.623                                       | F2: 1.000 | SW1: 24038 |             | OF1: 10063.0 |         | PTS1d: 32768 , 32768 |
| EX: zgpg30                                        |           | PW: 9.5 us | PD: 2.0 sec | NA: 85       | LB: 0.0 | Nuts - \$GWQ-2093_2  |

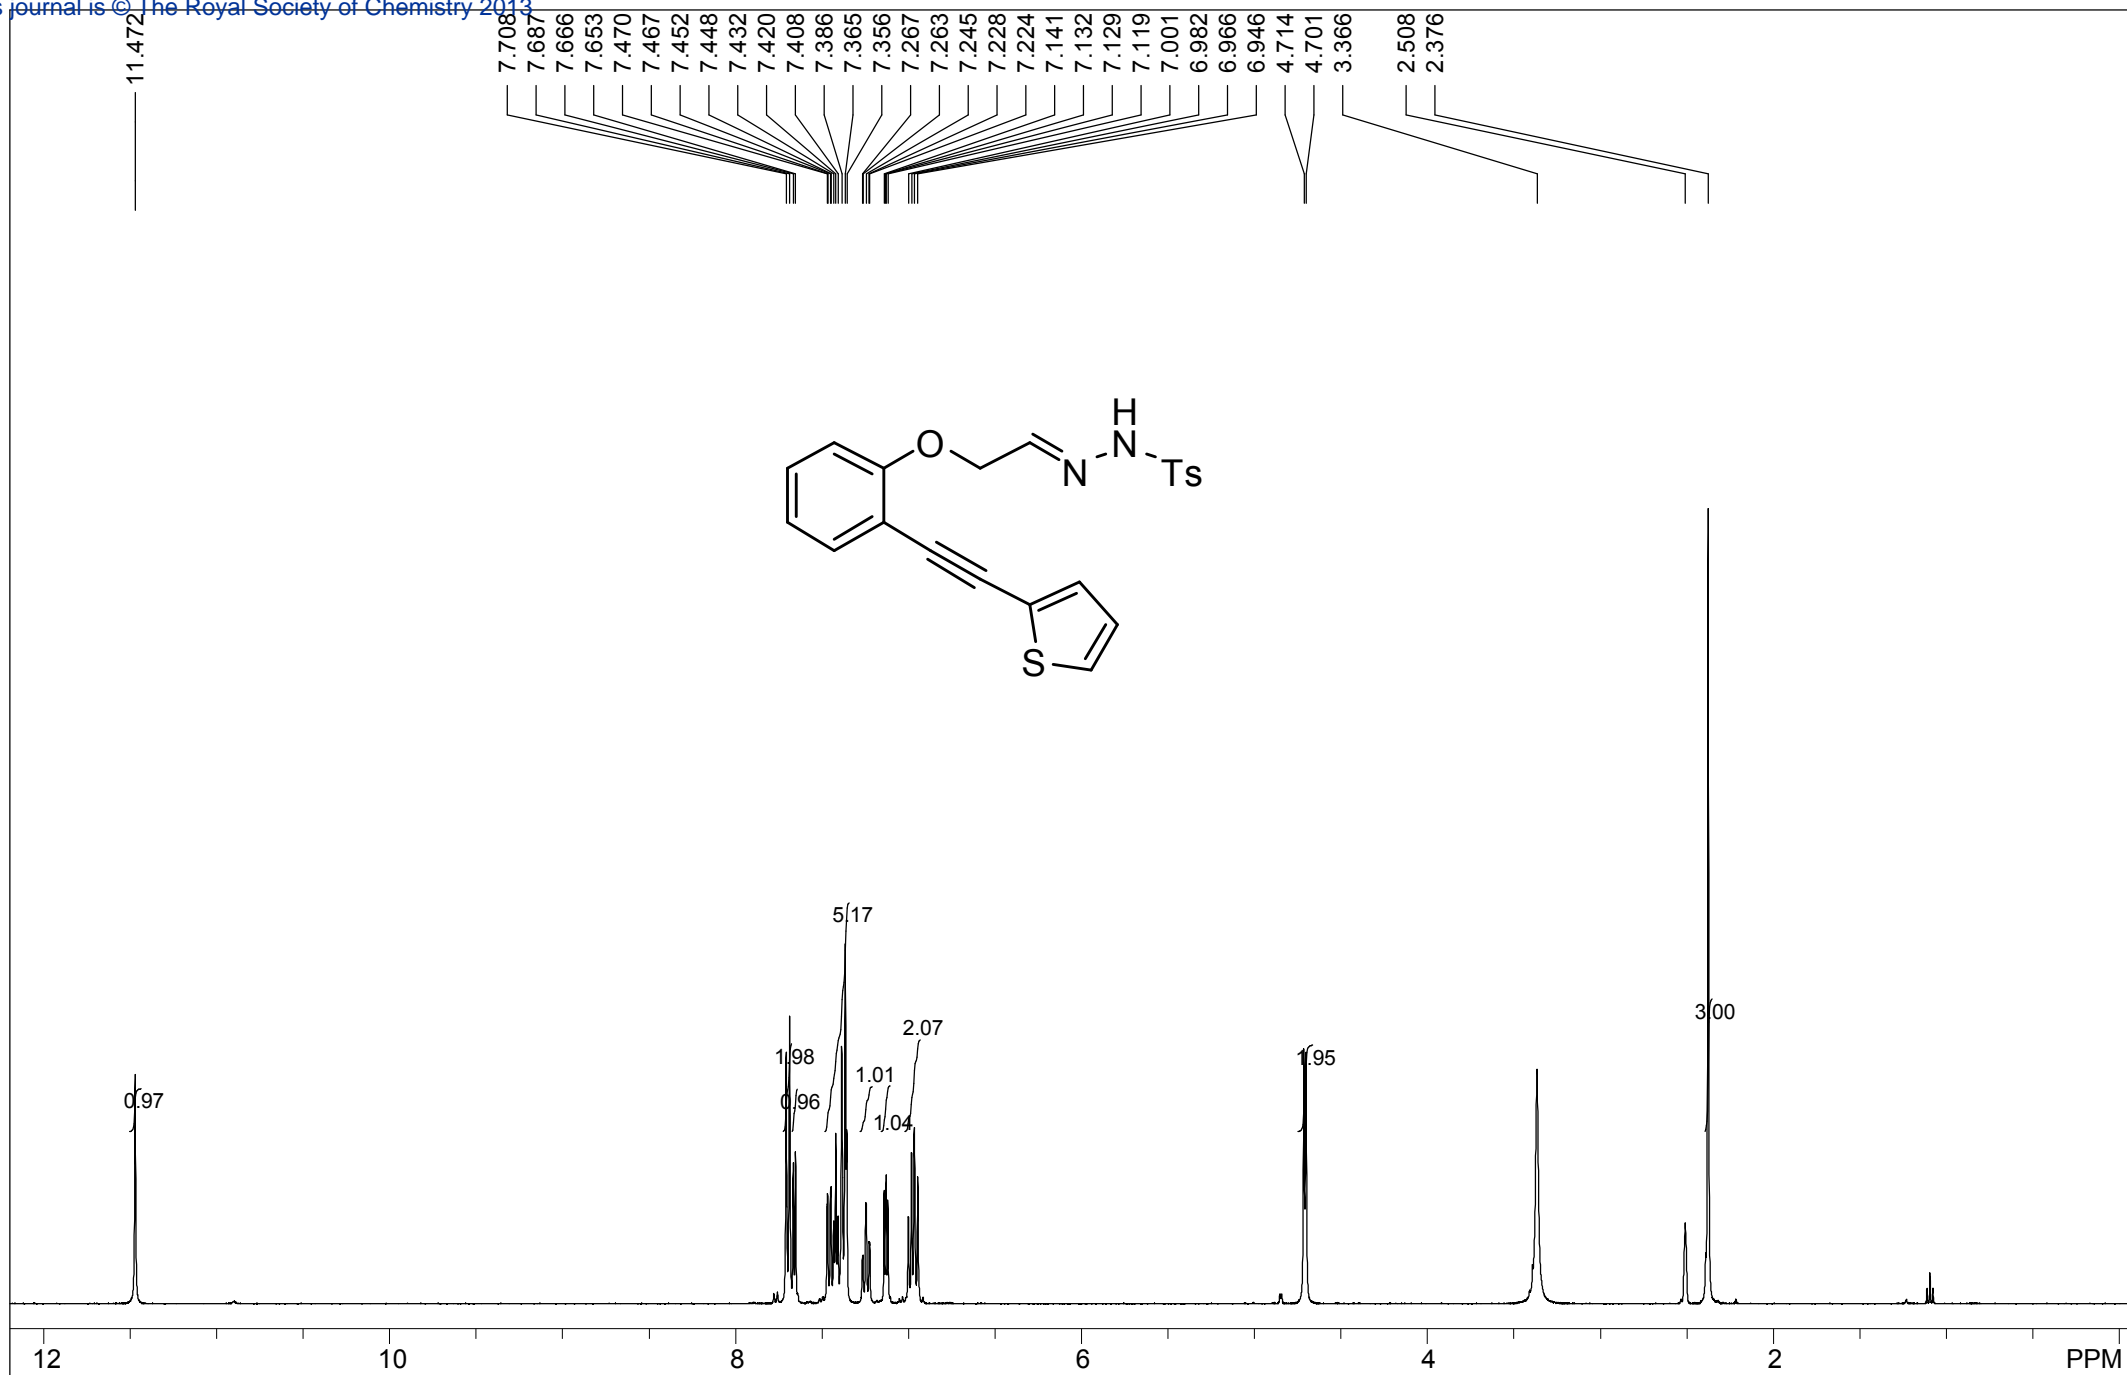

USER: Administr -- DATE: Fri Aug 19 22:37:17 2011

|             |             |             |             |                      |
|-------------|-------------|-------------|-------------|----------------------|
| F1: 400.132 | F2: 1.000   | SW1: 8224   | OF1: 2471.0 | PTS1d: 32768 , 32768 |
| EX: zg30    | PW: 13.6 us | PD: 1.0 sec | NA: 2       | LB: 0.0              |

Nuts - \$GWQ-2094\_1

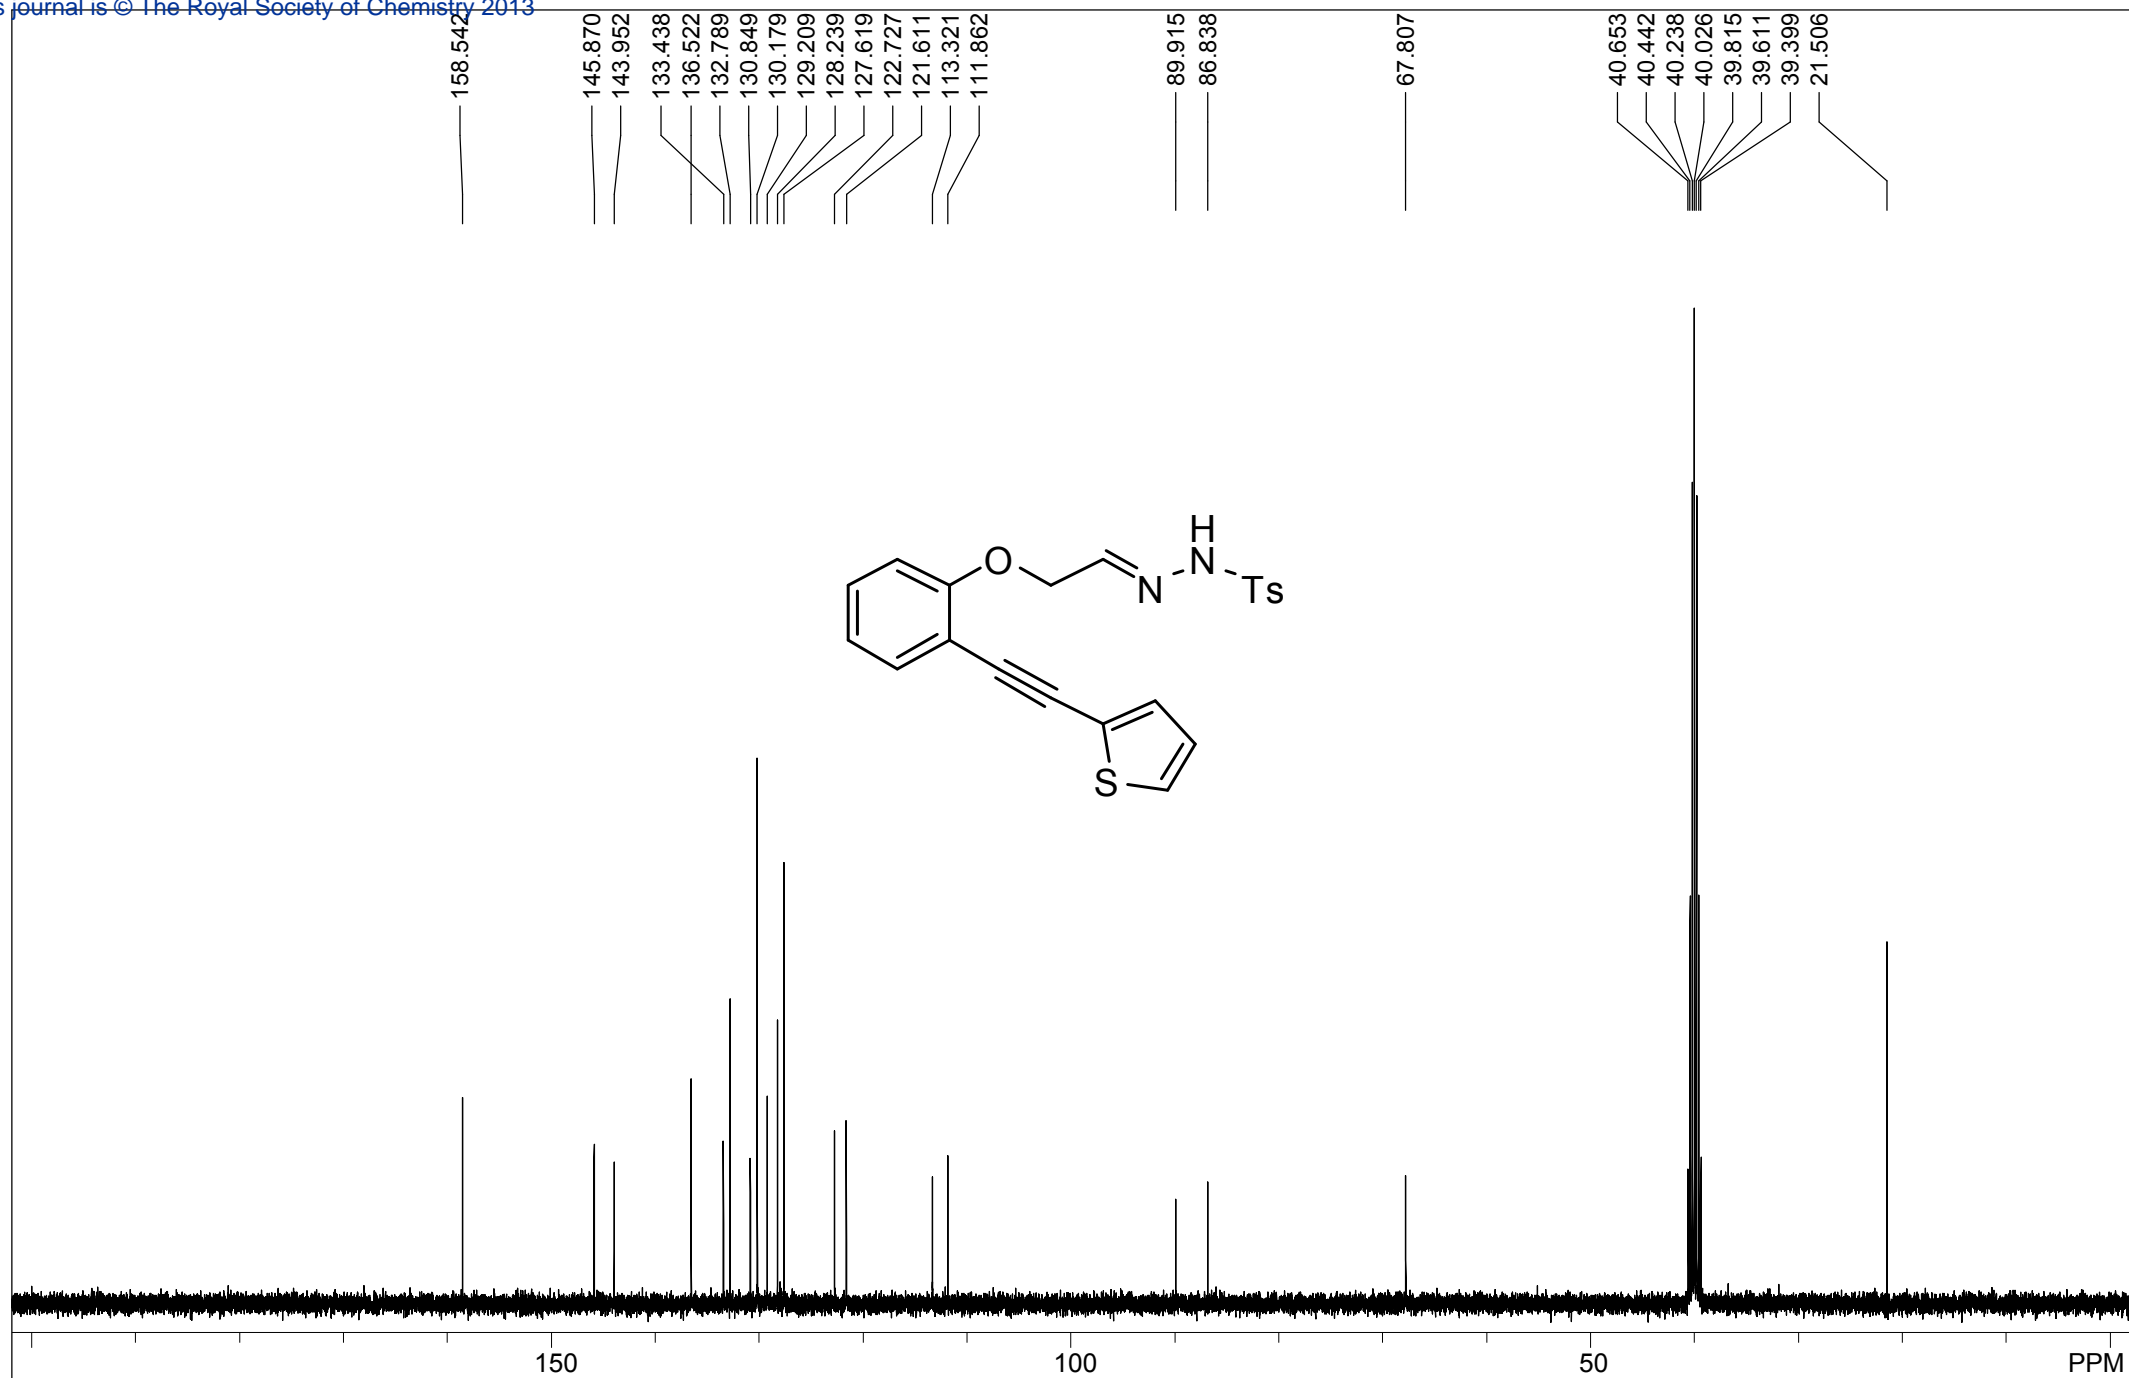

|             |  |            |  |             |  |              |  |                                                   |  |                     |  |
|-------------|--|------------|--|-------------|--|--------------|--|---------------------------------------------------|--|---------------------|--|
| F1: 100.623 |  | F2: 1.000  |  | SW1: 24038  |  | OF1: 10063.0 |  | USER: Administr -- DATE: Fri Aug 19 22:42:19 2011 |  |                     |  |
| EX: zgpg30  |  | PW: 9.5 us |  | PD: 2.0 sec |  | NA: 200      |  | PTS1d: 32768 , 32768                              |  |                     |  |
|             |  |            |  |             |  |              |  | LB: 0.0                                           |  | Nuts - \$GWQ-2094_2 |  |

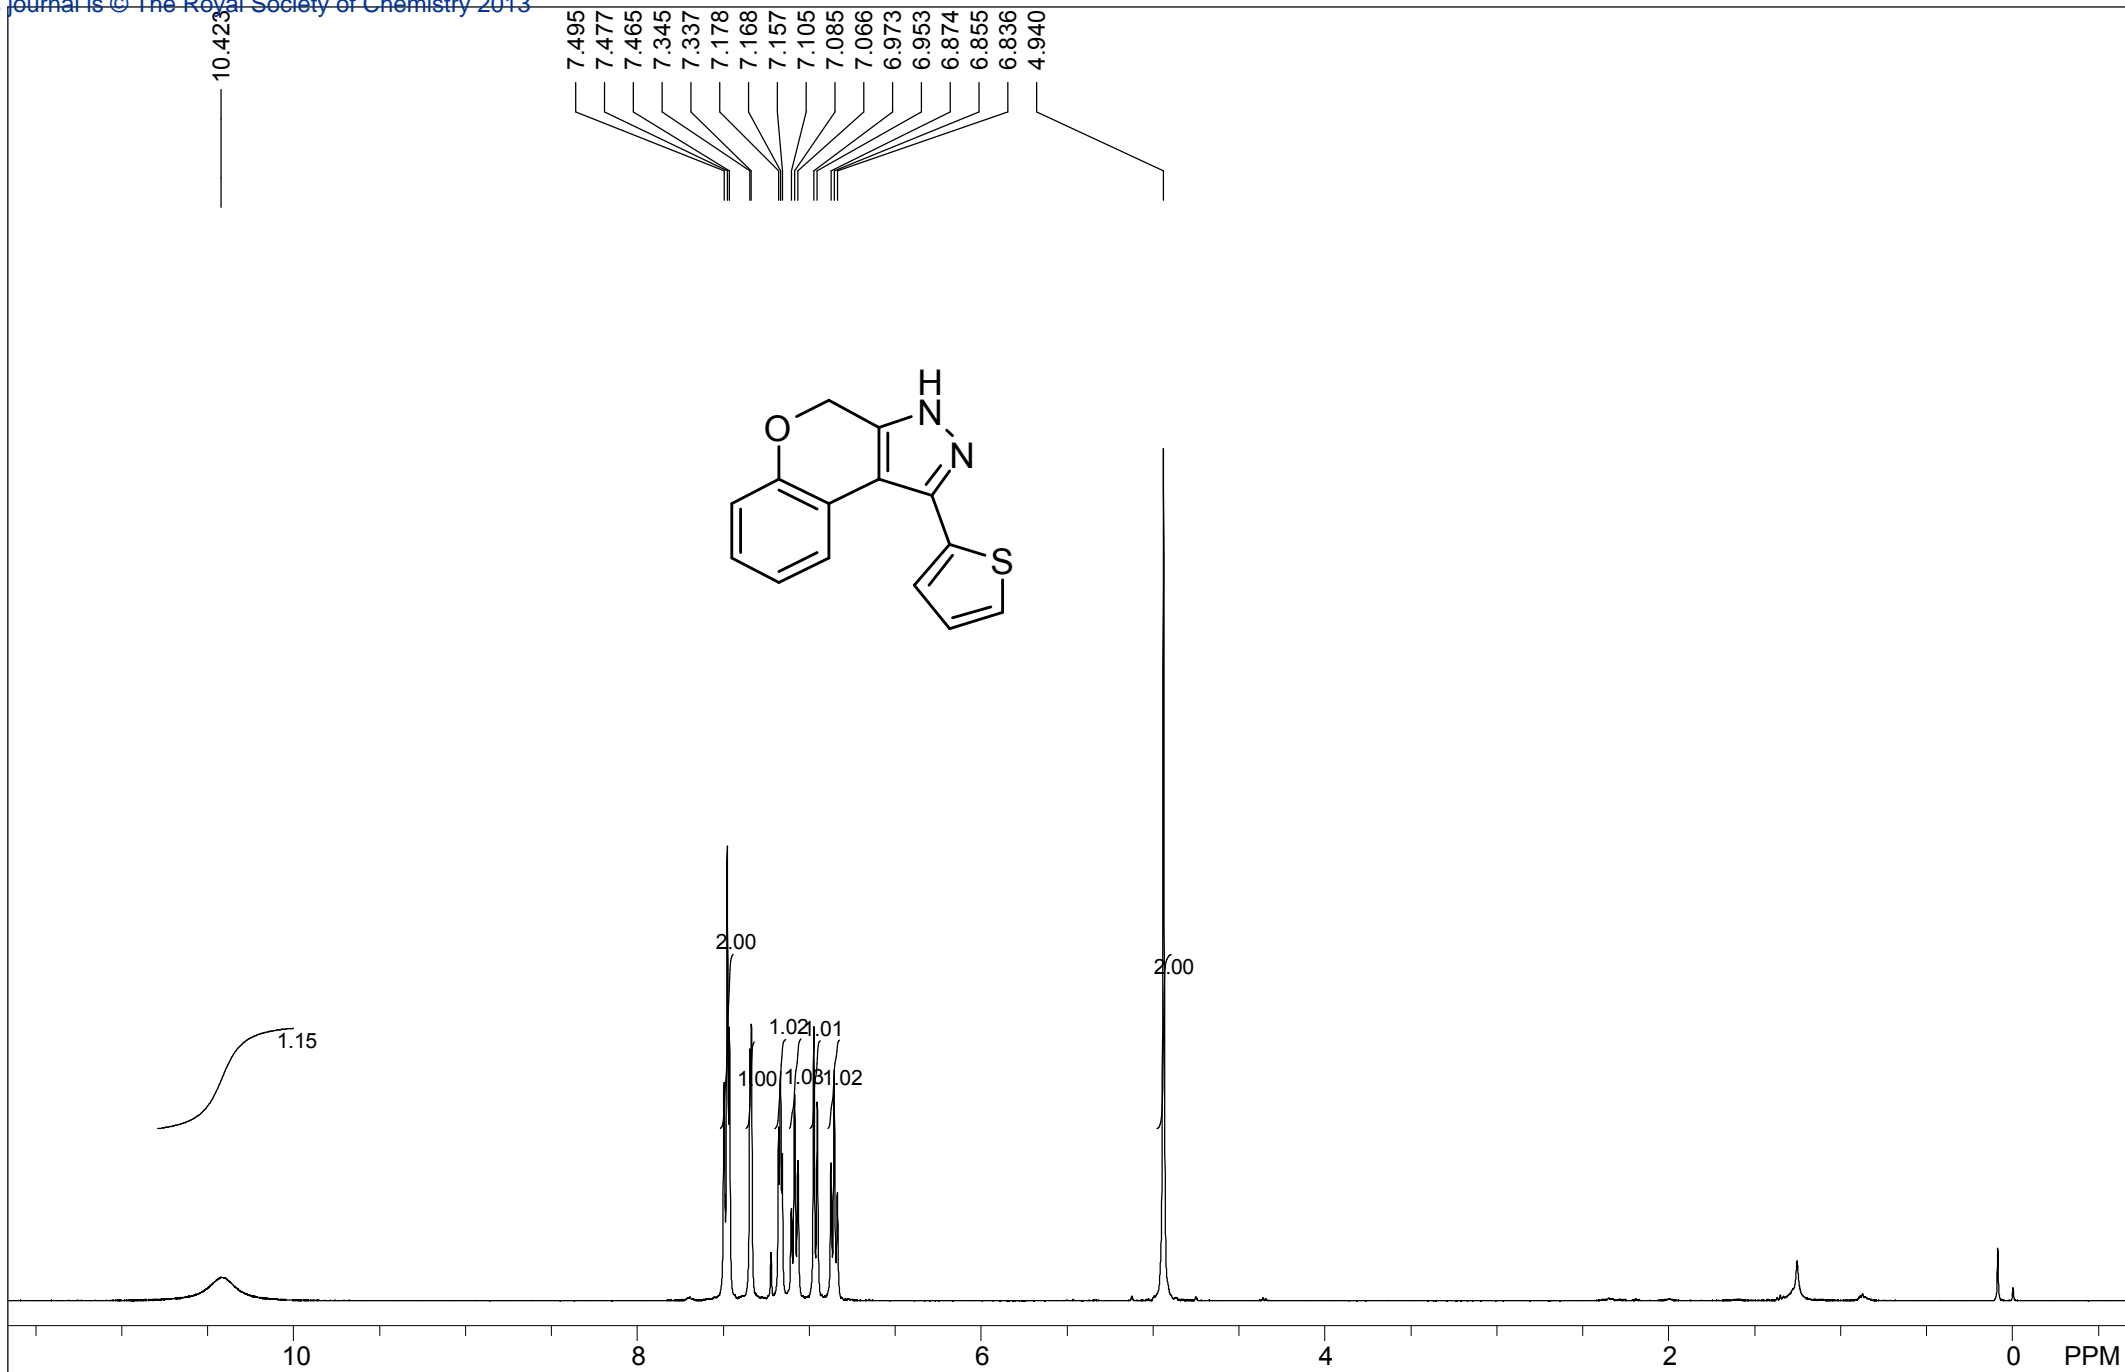

USER: Administr -- DATE: Sun Aug 21 03:38:33 2011

|                       |             |             |             |                      |
|-----------------------|-------------|-------------|-------------|----------------------|
| F1: 400.132           | F2: 1.000   | SW1: 8224   | OF1: 2446.3 | PTS1d: 32768 , 32768 |
| EX: zg30              | PW: 13.6 us | PD: 1.0 sec | NA: 2       | LB: 0.0              |
| Nuts - \$GWQ-2095-2_1 |             |             |             |                      |

152.542  
145.855  
132.483  
130.266  
128.509  
127.962  
127.889  
127.561  
123.128  
122.070  
119.263  
117.491  
110.812  
77.439  
77.126  
76.805  
63.709

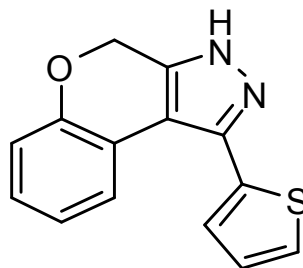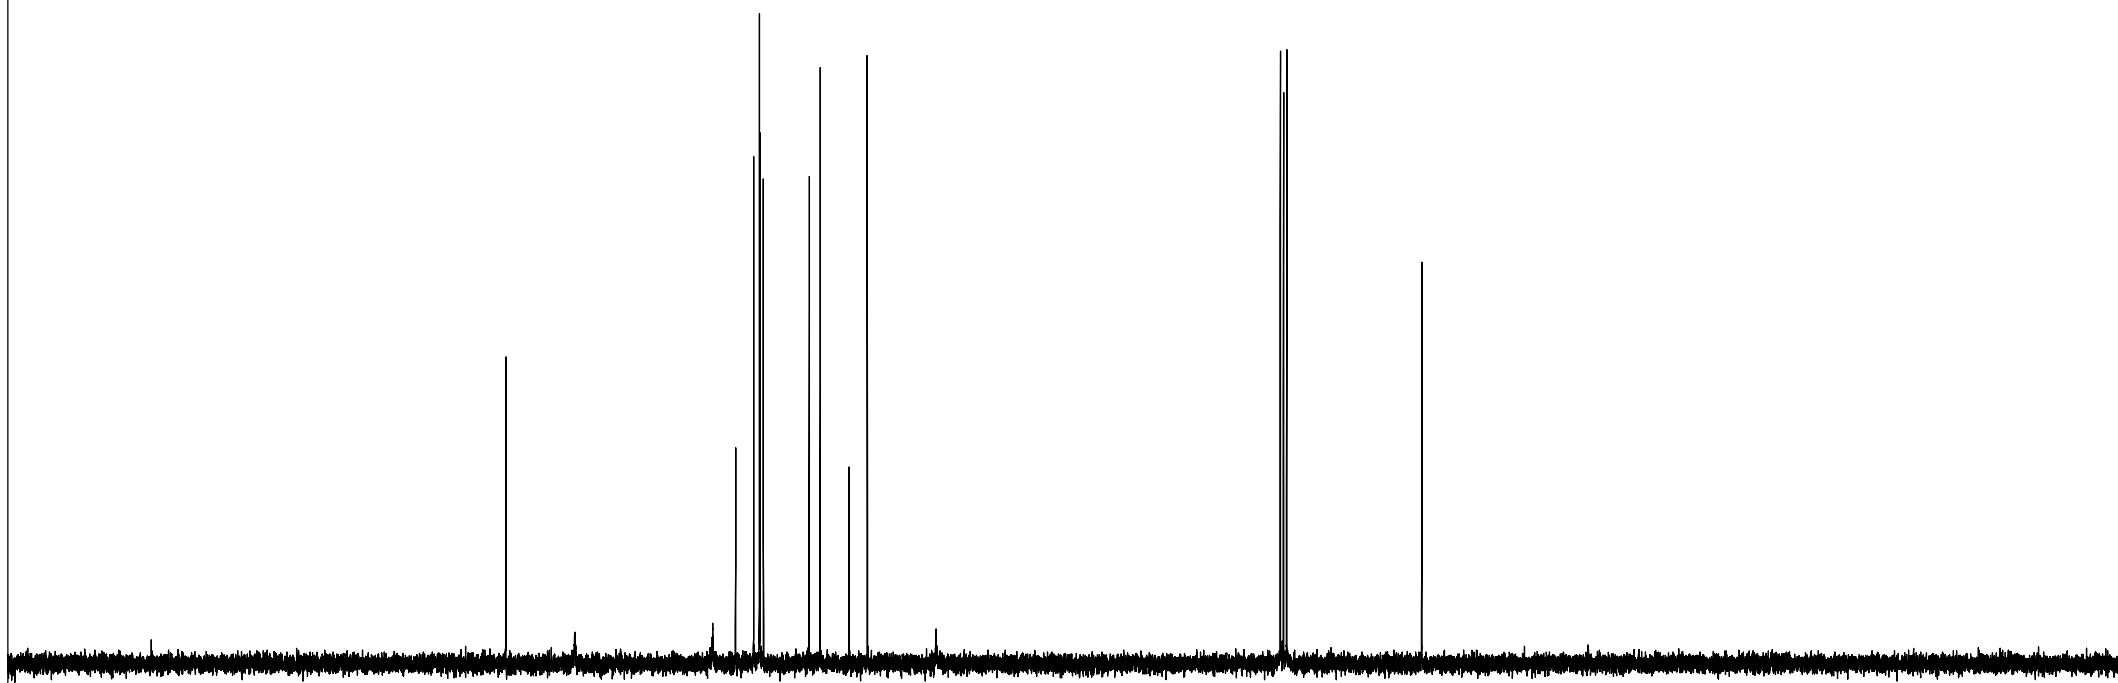

150

100

50

PPM

USER: Administr -- DATE: Sun Aug 21 03:44:08 2011

F1: 100.623

F2: 1.000

SW1: 24038

OF1: 10063.0

PTS1d: 32768 , 32768

EX: zgpg30

PW: 9.5 us

PD: 2.0 sec

NA: 200

LB: 0.0

Nuts - \$GWQ-2095-2\_2

7.961  
7.955  
7.949  
7.395  
7.386  
7.376  
7.285  
7.085  
7.073  
7.070  
6.881  
6.874  
4.473  
3.952  
3.933  
3.916  
3.898  
0.959  
0.941  
0.940  
0.923

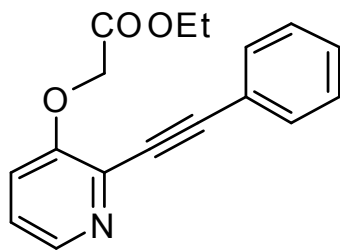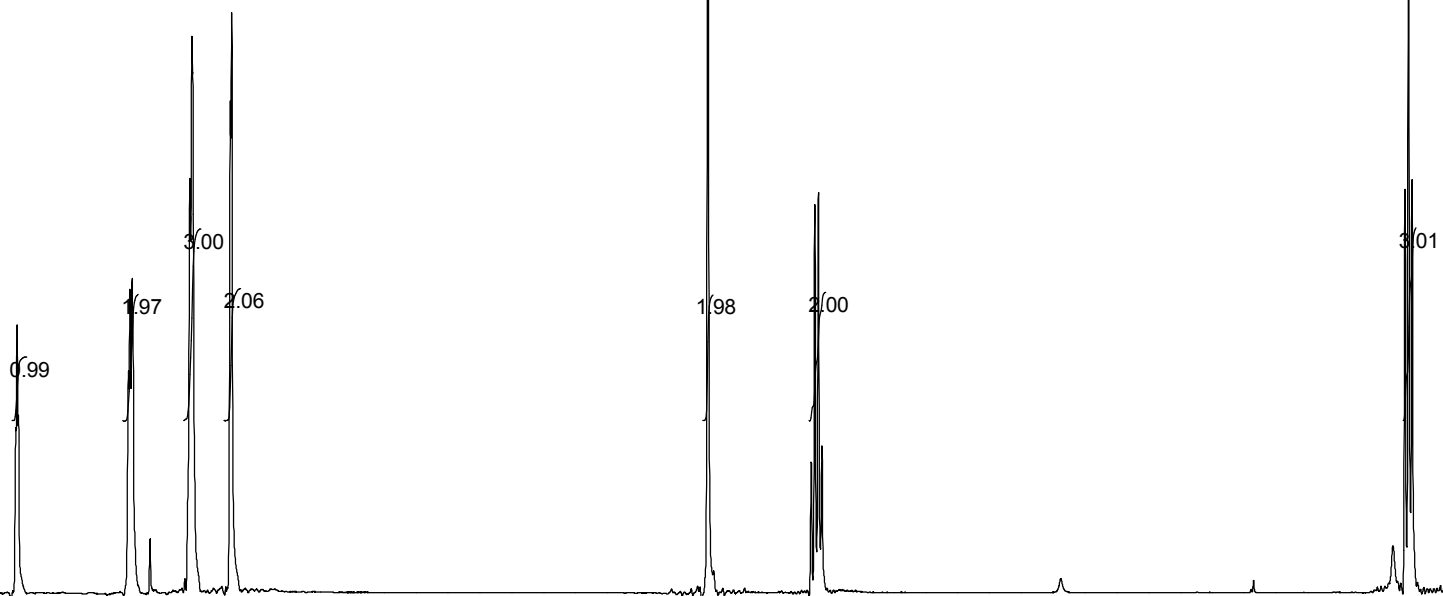

10 8 6 4 2 0 PPM

USER: Administr -- DATE: Sat Jul 16 11:36:03 2011

|             |           |             |             |             |         |                      |
|-------------|-----------|-------------|-------------|-------------|---------|----------------------|
| F1: 400.132 | F2: 1.000 | SW1: 8224   |             | OF1: 2471.0 |         | PTS1d: 32768 , 32768 |
| EX: zg30    |           | PW: 13.6 us | PD: 1.0 sec | NA: 2       | LB: 0.0 | Nuts - \$GWQ-2086_1  |

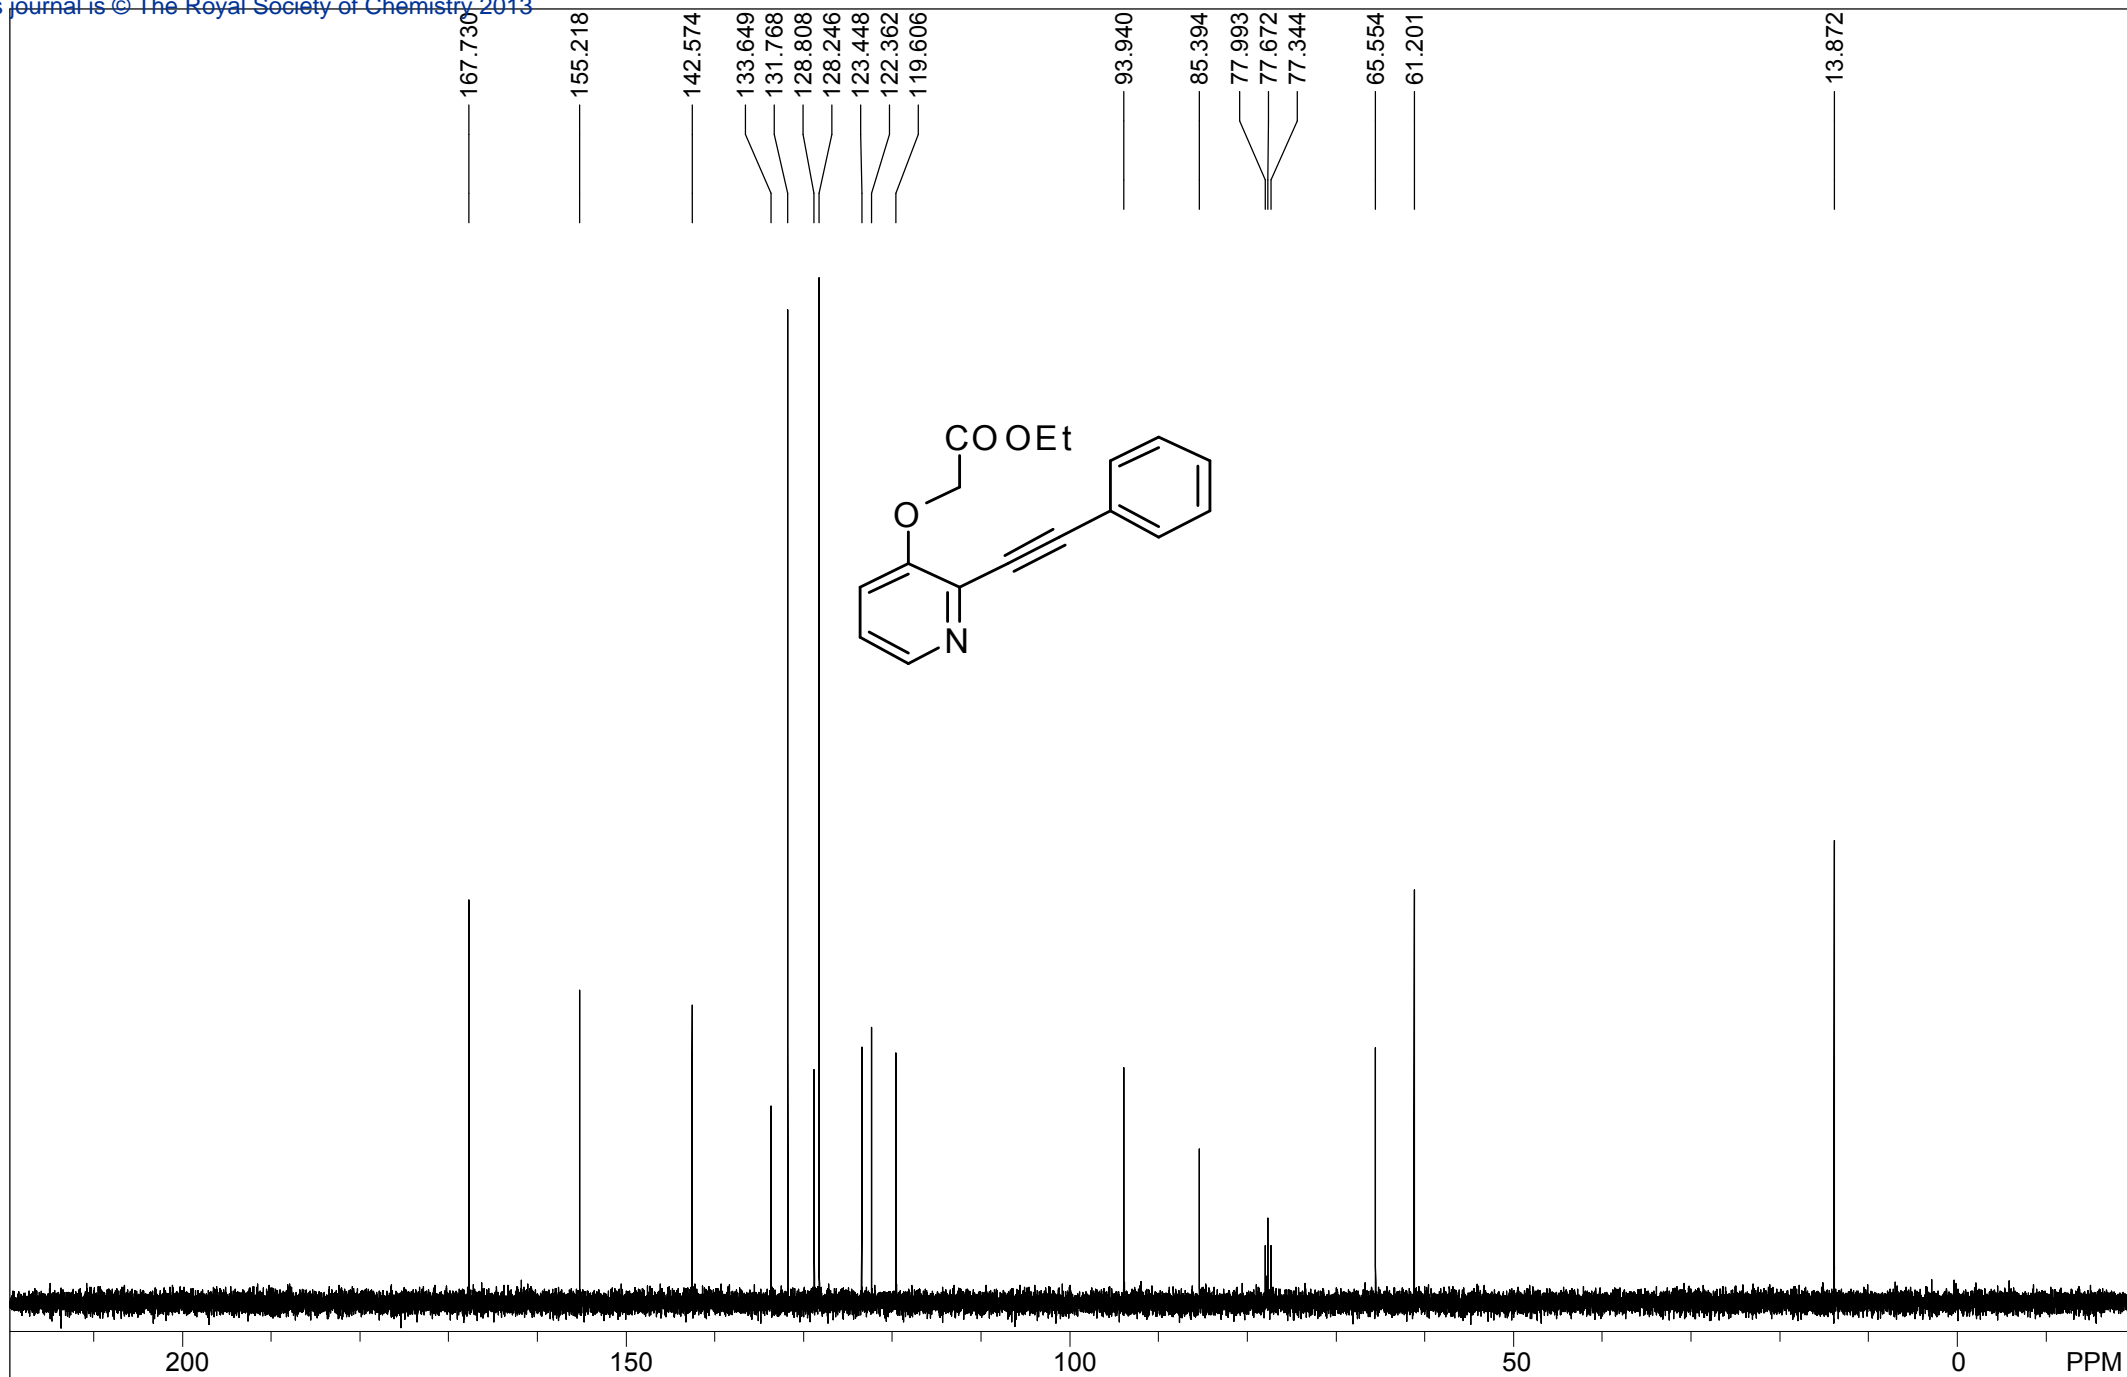

USER: Administr -- DATE: Sat Jul 16 11:40:39 2011

|             |           |            |             |              |         |                      |                     |
|-------------|-----------|------------|-------------|--------------|---------|----------------------|---------------------|
| F1: 100.623 | F2: 1.000 | SW1: 24038 |             | OF1: 10063.0 |         | PTS1d: 32768 , 32768 |                     |
| EX: zgpg30  |           | PW: 9.5 us | PD: 2.0 sec | NA: 2        | LB: 0.0 |                      | Nuts - \$GWQ-2086_3 |



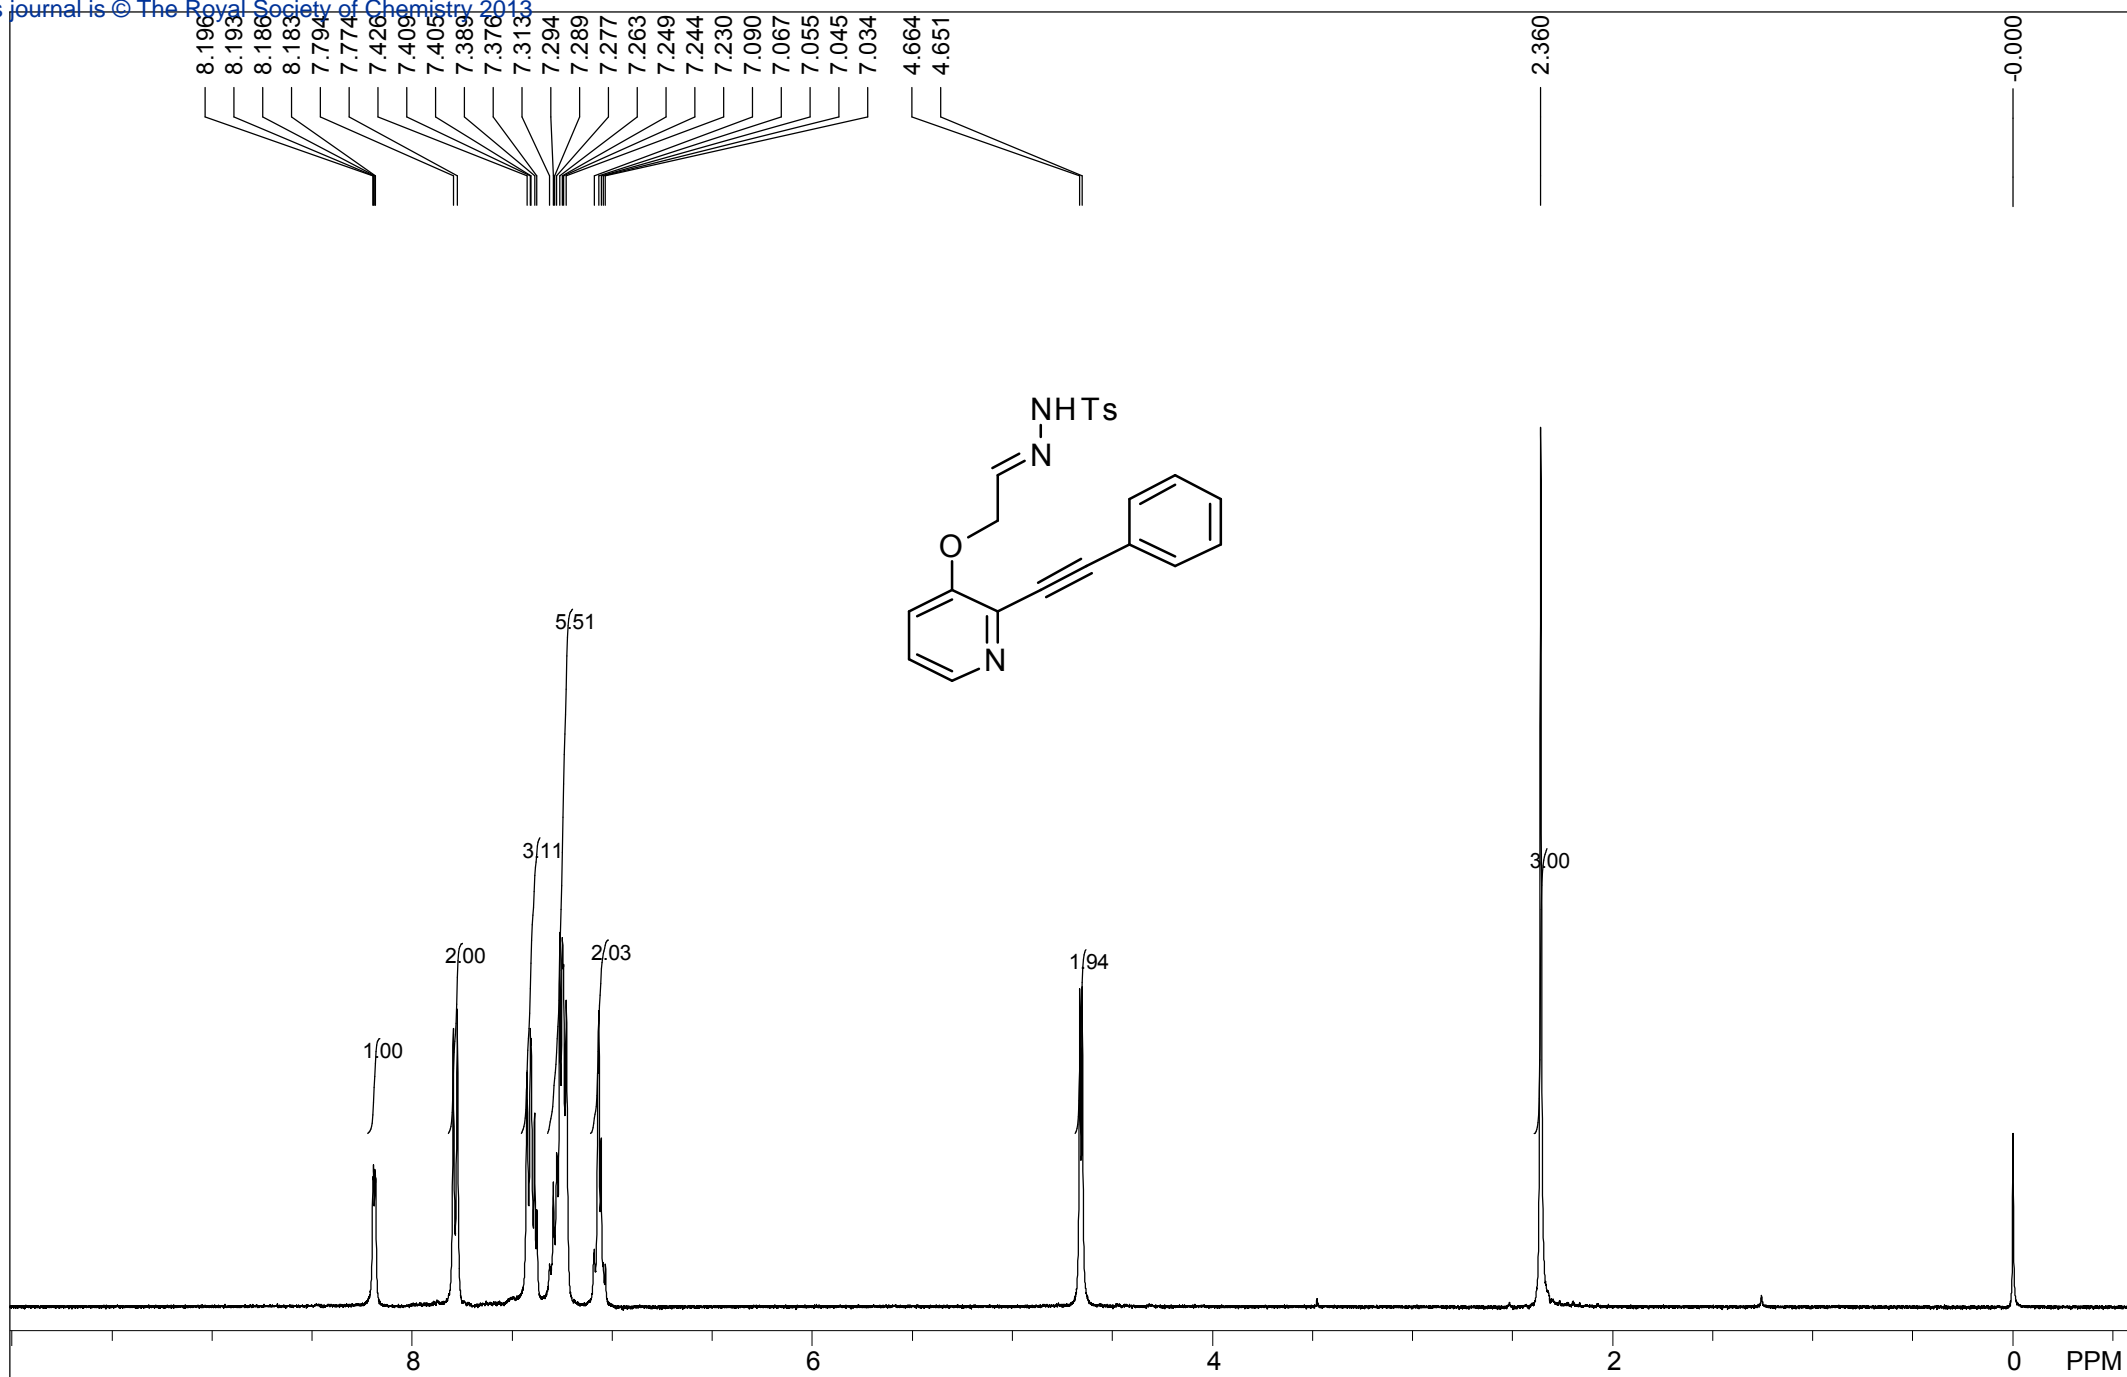

USER: nmr -- DATE: Wed Sep 21 22:15:40 2011

|             |           |             |             |             |         |                      |
|-------------|-----------|-------------|-------------|-------------|---------|----------------------|
| F1: 400.132 | F2: 1.000 | SW1: 8224   |             | OF1: 2462.6 |         | PTS1d: 32768 , 32768 |
| EX: zg30    |           | PW: 13.3 us | PD: 1.0 sec | NA: 2       | LB: 0.0 | Nuts - \$GWQ-2107_1  |

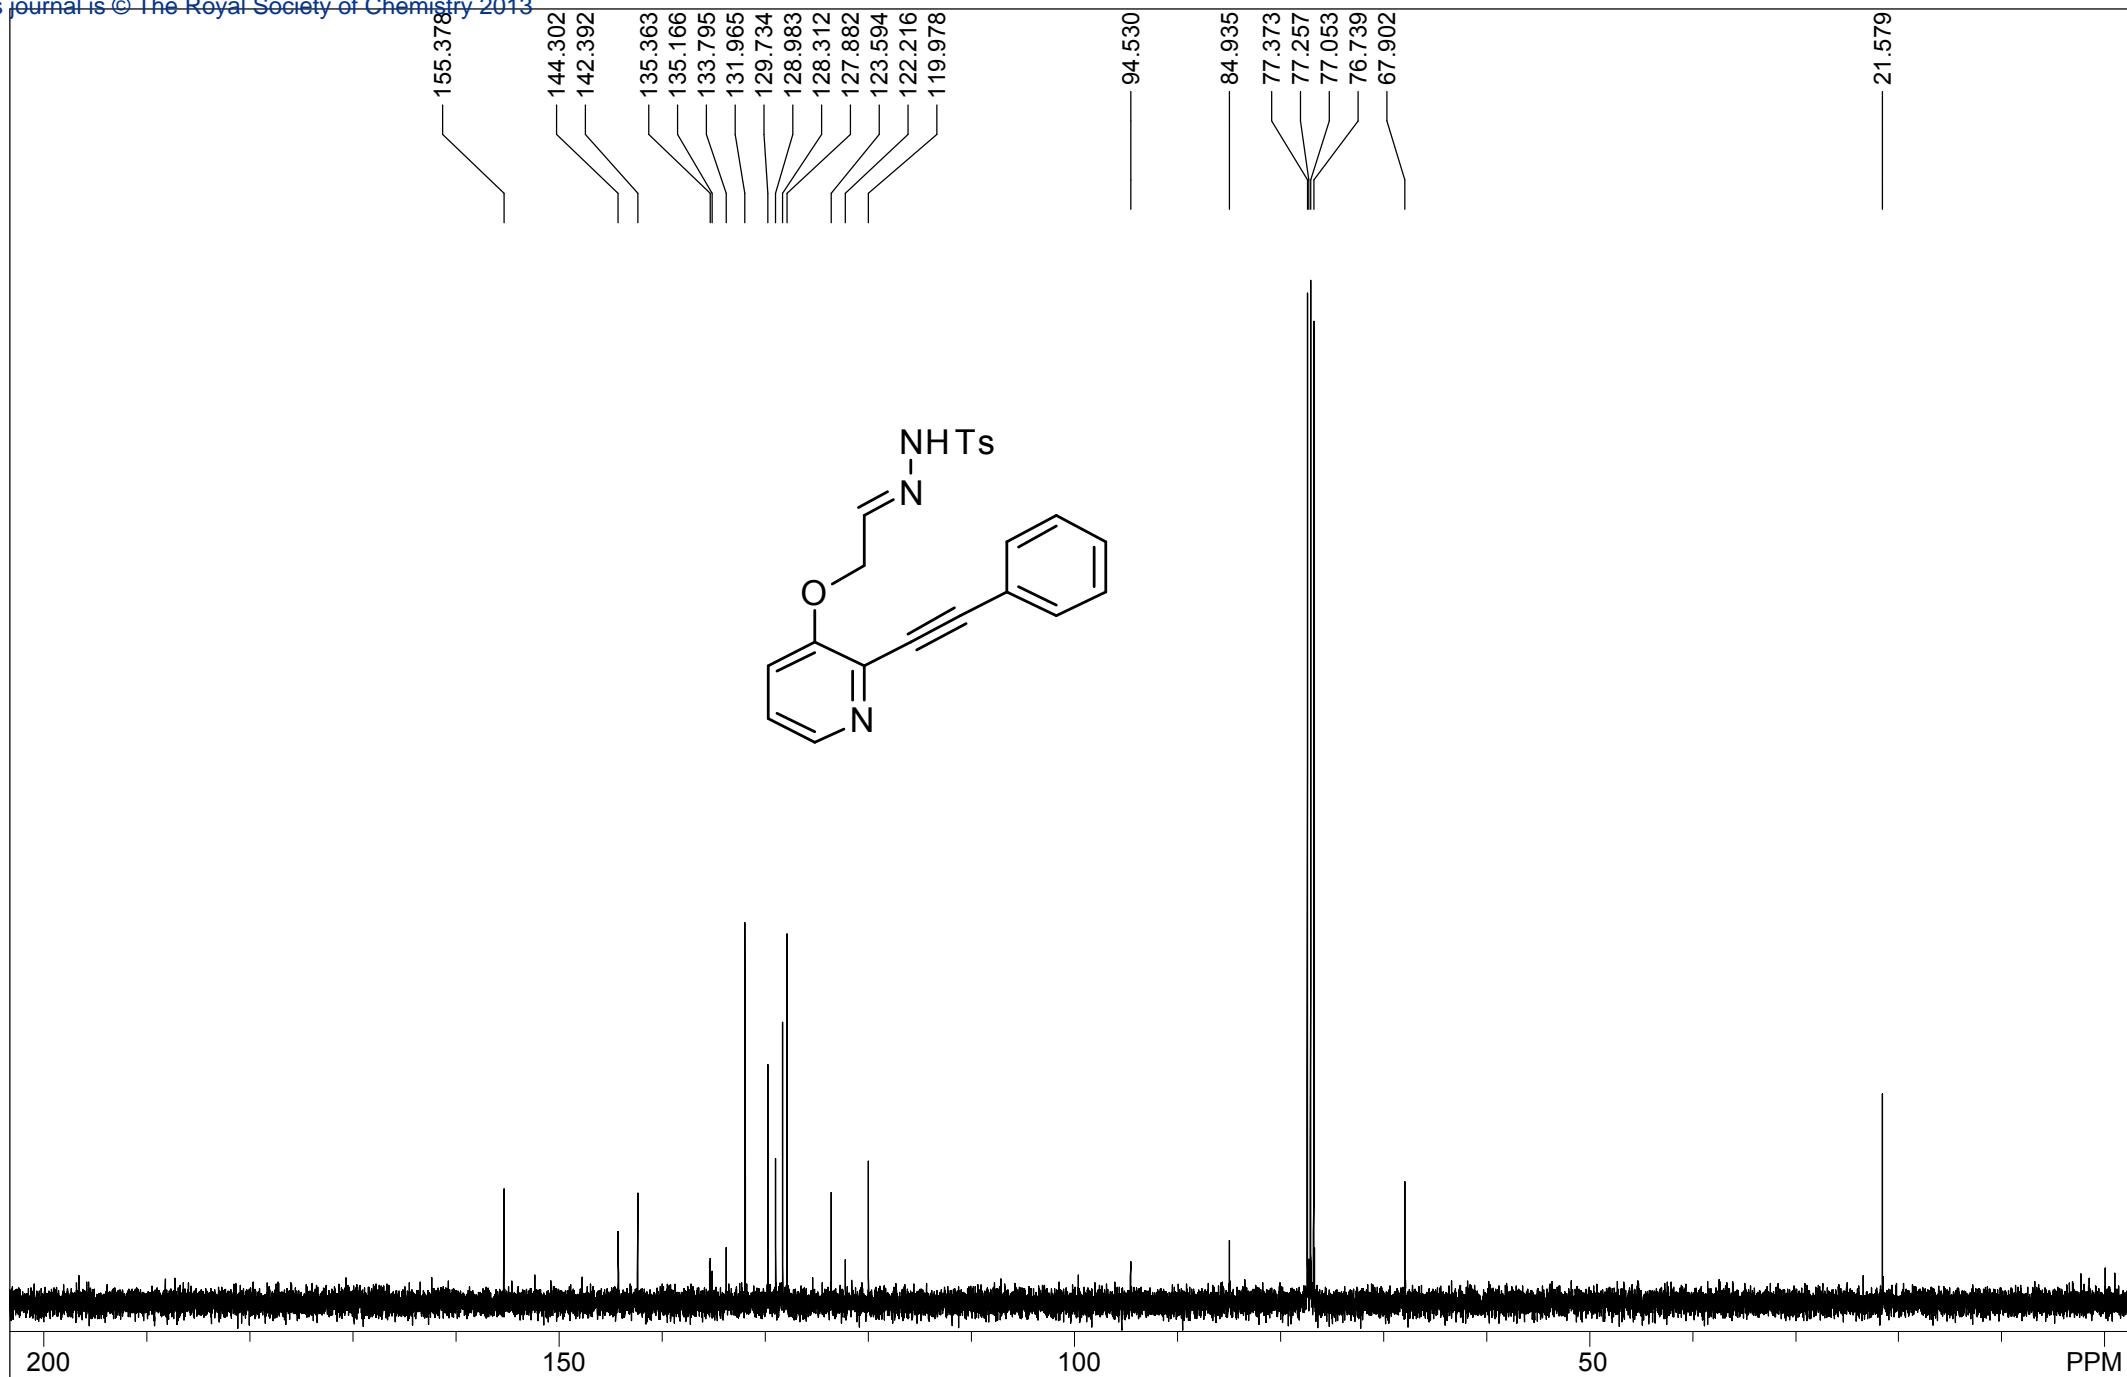

200 150 100 50 PPM

USER: nmr -- DATE: Wed Sep 21 22:23:14 2011

|             |           |            |             |              |         |                      |                     |
|-------------|-----------|------------|-------------|--------------|---------|----------------------|---------------------|
| F1: 100.623 | F2: 1.000 | SW1: 24038 |             | OF1: 10063.0 |         | PTS1d: 32768 , 32768 |                     |
| EX: zgpg30  |           | PW: 9.4 us | PD: 2.0 sec | NA: 300      | LB: 0.0 |                      | Nuts - \$GWQ-2107_2 |

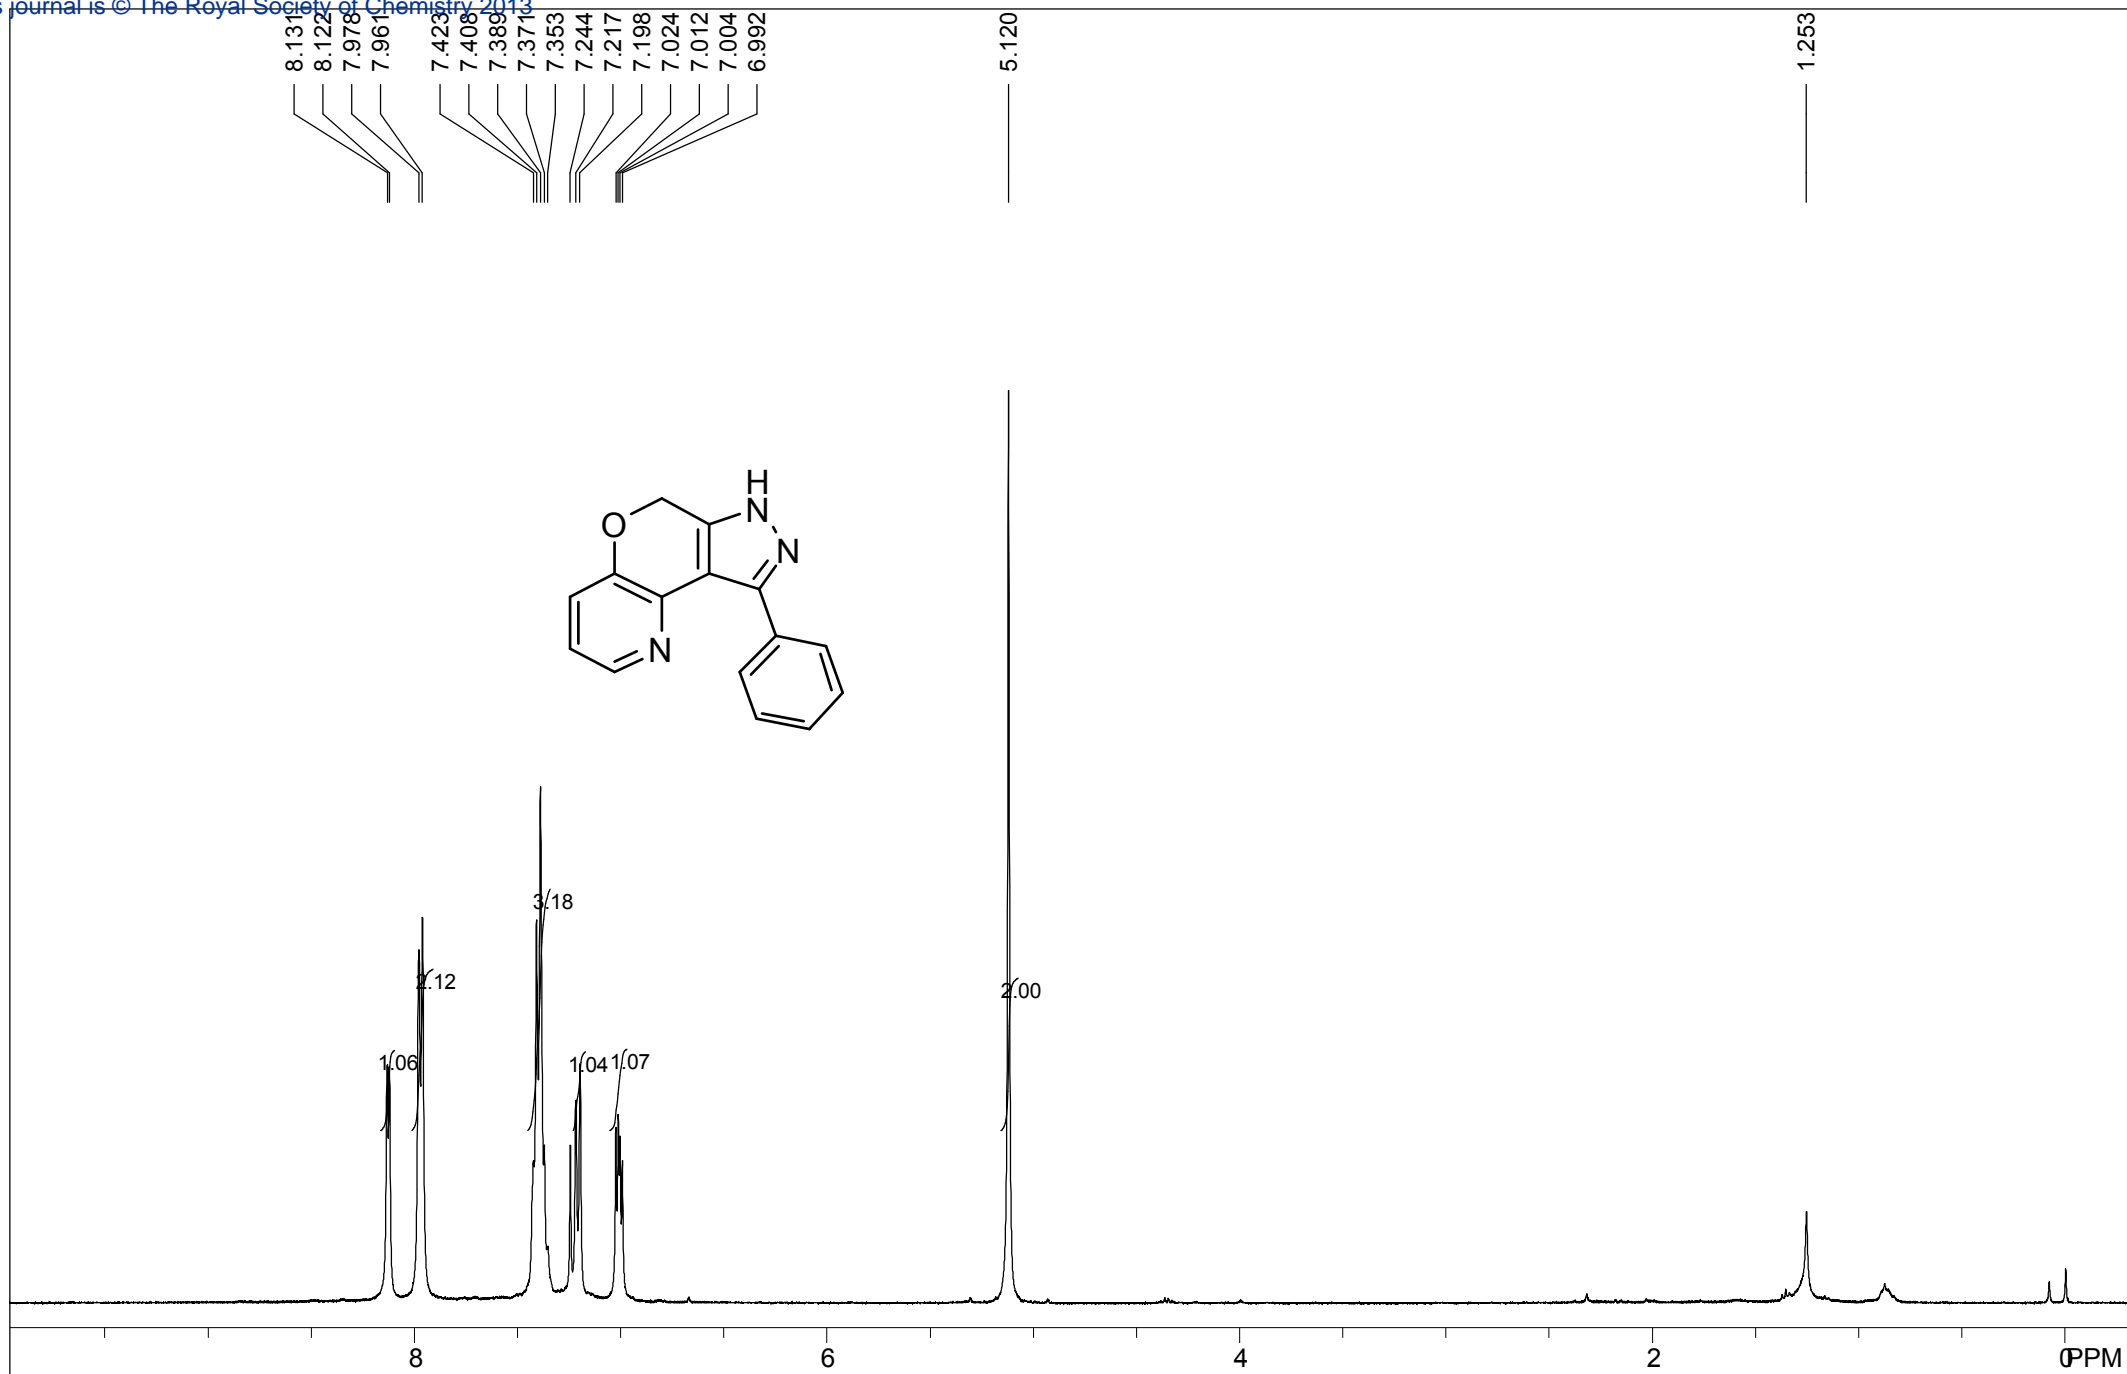

USER: Administr -- DATE: Thu Aug 25 22:22:23 2011

|             |           |             |             |             |         |                      |
|-------------|-----------|-------------|-------------|-------------|---------|----------------------|
| F1: 400.132 | F2: 1.000 | SW1: 8224   |             | OF1: 2454.9 |         | PTS1d: 32768 , 32768 |
| EX: zg30    |           | PW: 13.6 us | PD: 1.0 sec | NA: 2       | LB: 0.0 | Nuts - \$GWQ-2097_1  |

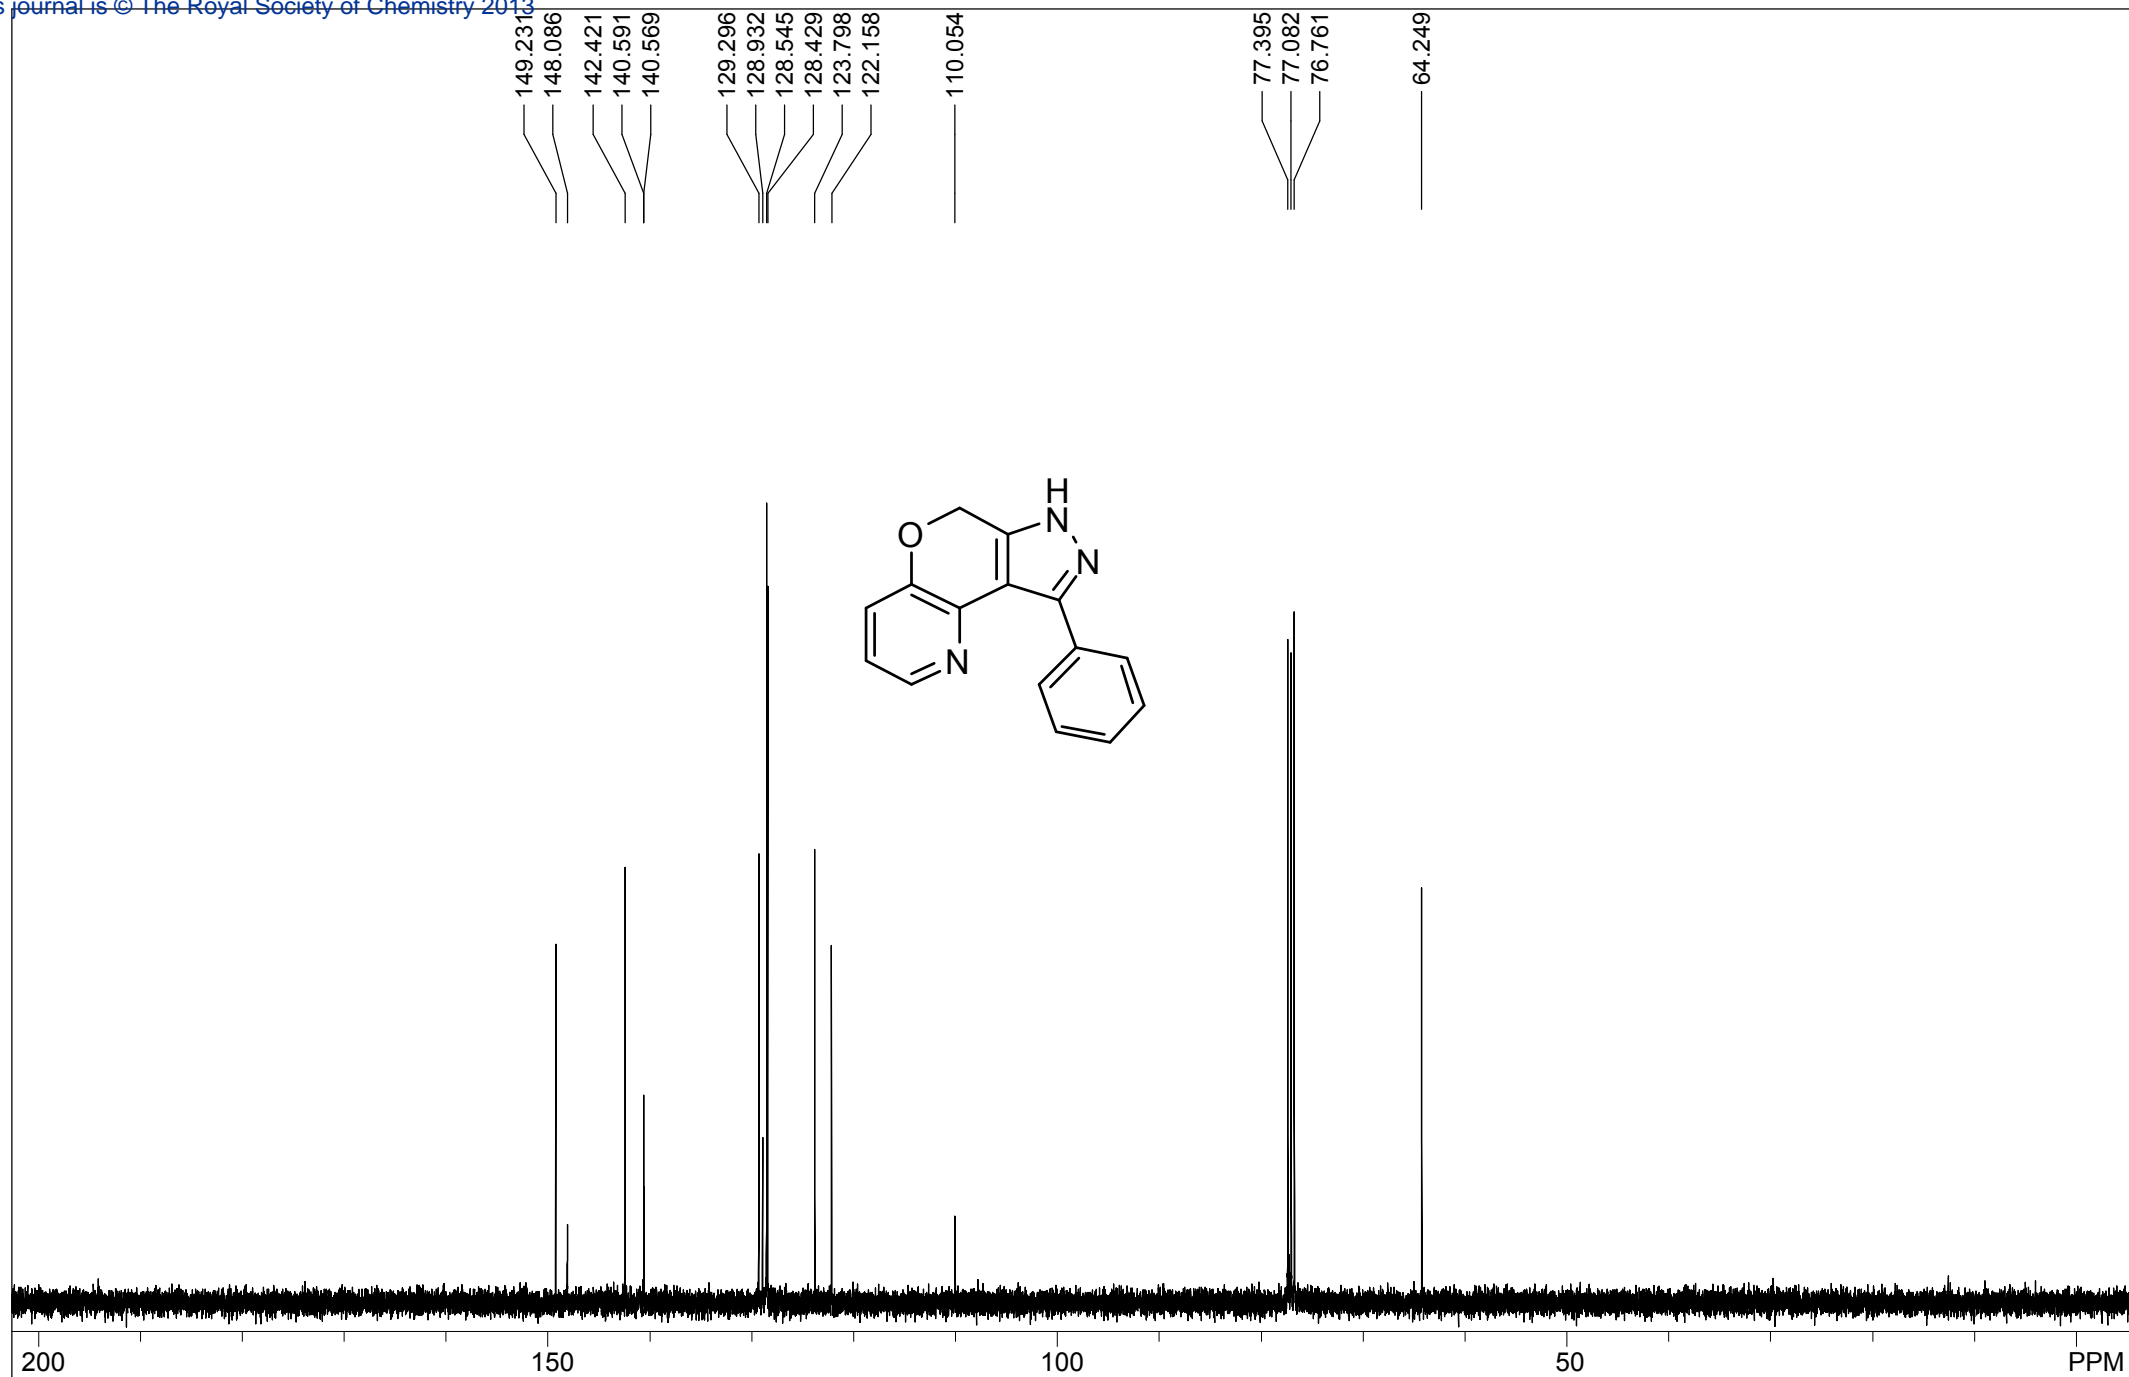

200

150

100

50

PPM

USER: Administr -- DATE: Thu Aug 25 22:31:03 2011

F1: 100.623

F2: 1.000

SW1: 24038

OF1: 10063.0

PTS1d: 32768 , 32768

EX: zgpg30

PW: 9.5 us

PD: 2.0 sec

NA: 209

LB: 0.0

Nuts - \$GWQ-2097\_2
